# Supplementary material
Source: PubMed Central journal article supplement (PMC5189681)

## TABLE OF CONTENTS

|                                                                               |    |
|-------------------------------------------------------------------------------|----|
| TABLE OF CONTENTS .....                                                       | 1  |
| MATERIALS AND METHODS .....                                                   | 9  |
| EXPERIMENTAL DATA .....                                                       | 10 |
| Syntheses of Labeling Precursors .....                                        | 10 |
| Table S1. Pd-catalyzed fluoroacetophenonation of arenes .....                 | 10 |
| General procedure of Pd-catalyzed fluoroacetophenonation .....                | 11 |
| (Methylenedioxy)phenyl-fluoroacetophenone ( <b>2a</b> ).....                  | 11 |
| (4- <i>N</i> -Boc-methylamino)phenyl-fluoroacetophenone ( <b>2b</b> ).....    | 12 |
| (3-Cyanocyclopropyl)phenyl-fluoroacetophenone ( <b>2c</b> ).....              | 12 |
| (3-Hydroxypropanyl)phenyl-fluoroacetophenone ( <b>2d</b> ) .....              | 13 |
| 1-Bromo-3-chloro-5-(phenylethynyl)benzene ( <b>S11</b> ).....                 | 14 |
| (3-Chloro-5-phenylacetylenyl)phenyl-fluoroacetophenone ( <b>2e</b> ).....     | 14 |
| (4-Pyrazolyl)phenyl-fluoroacetophenone ( <b>2f</b> ).....                     | 15 |
| (3-Morpholino)phenyl-fluoroacetophenone ( <b>2g</b> ) .....                   | 16 |
| (3-Nitro)phenyl-fluoroacetophenone ( <b>2h</b> ).....                         | 17 |
| Fluoren-9-onyl-fluoroacetophenone ( <b>2i</b> ) .....                         | 17 |
| (4-Ethyl-carboxyl)phenyl-fluoroacetophenone ( <b>2j</b> ).....                | 18 |
| (3-Dioxolanyl)phenyl-fluoroacetophenone ( <b>S1</b> ) .....                   | 19 |
| (3-Formyl)phenyl-fluoroacetophenone ( <b>2k</b> ) .....                       | 19 |
| (2-Chlorophenyl-methanonyl)phenyl-fluoroacetophenone ( <b>2l</b> ) .....      | 20 |
| Quinoline-6-fluoroacetophenone ( <b>2m</b> ) .....                            | 21 |
| (2-Methylbenzo[ <i>d</i> ]thiazol-5-yl)-fluoroacetophenone ( <b>2n</b> )..... | 21 |
| Pyridine-3-fluoroacetophenone ( <b>2o</b> ) .....                             | 22 |
| Quinoline-3-fluoroacetophenone ( <b>2p</b> ) .....                            | 23 |
| (Morpholinomethyl)phenyl-fluoroacetophenone ( <b>2q</b> ).....                | 23 |
| Mesitylenyl-fluoroacetophenone ( <b>2s</b> ).....                             | 24 |
| (3-Chloro)phenyl-fluoroacetophenone ( <b>S2</b> ) .....                       | 25 |
| (1-Fluoro-2-oxo-2-phenylethyl)-fenofibrate ( <b>S3</b> ) .....                | 25 |
| (1-Fluoro-2-oxo-2-phenylethyl)-DAA1106 ( <b>S4</b> ) .....                    | 26 |
| (1-Fluoro-2-oxo-2-phenylethyl)-estrone ( <b>S5</b> ) .....                    | 27 |
| (1-Fluoro-2-oxo-2-phenylethyl)-claritin ( <b>S6</b> ).....                    | 28 |
| 4-Bromo- <i>N,N</i> -diethyl-3-methoxybenzamide ( <b>S12</b> ).....           | 29 |
| (1-Fluoro-2-oxo-2-phenylethyl)-analepticon ( <b>S7</b> ).....                 | 29 |
| (1-Fluoro-2-oxo-2-phenylethyl)- <i>N</i> -Boc-fluoxetine ( <b>S8</b> ).....   | 30 |

|                                                                                                                |    |
|----------------------------------------------------------------------------------------------------------------|----|
| (1-Fluoro-2-oxo-2-phenylethyl)-SC-58125 ( <b>S9</b> ) .....                                                    | 31 |
| Hydroquinidine 4-(1-fluoro-2-oxo-2-phenylethyl)-benzoate ( <b>S10</b> ) .....                                  | 32 |
| Phenyl-bromo-fluoroacetophenone ( <b>2r'</b> ) .....                                                           | 32 |
| Quinoline-6-bromo-fluoroacetophenone ( <b>2m'</b> ) .....                                                      | 33 |
| Syntheses of Difluoromethyl-arenes .....                                                                       | 34 |
| Difluoromethyl-benzodioxole ( <b>3a</b> ) .....                                                                | 34 |
| 3-Cyanocyclopropyl-difluoromethylbenzene ( <b>3c</b> ) .....                                                   | 34 |
| 3-Isopropanolyl-difluoromethylbenzene ( <b>3d</b> ) .....                                                      | 35 |
| 3-Chloro-(5-phenylethynyl)-difluoromethylbenzene ( <b>3e</b> ) .....                                           | 36 |
| 4-Pyrazolyl-difluoromethylbenzene ( <b>3f</b> ) .....                                                          | 37 |
| 3-Morpholino-difluoromethylbenzene ( <b>3g</b> ) .....                                                         | 37 |
| 2-Difluoromethylfluoren-9-one ( <b>3i</b> ) .....                                                              | 38 |
| 2-Chlorophenyl-(4-difluoromethyl)phenyl-methanone ( <b>3l</b> ) .....                                          | 39 |
| 5-Difluoromethyl-2-methylbenzo[ <i>d</i> ]thiazole ( <b>3n</b> ) .....                                         | 39 |
| 3-Difluoromethylquinoline ( <b>3p</b> ) .....                                                                  | 40 |
| 4-Morpholinomethyl-difluoromethylbenzene ( <b>3q</b> ) .....                                                   | 41 |
| Difluoromethyl-fenofibrate .....                                                                               | 42 |
| Difluoromethyl-DAA1106 .....                                                                                   | 42 |
| Difluoromethyl-estrone .....                                                                                   | 43 |
| Difluoromethyl-Clarithin .....                                                                                 | 44 |
| Difluoromethyl- <i>N</i> -Boc-Fluoxetine .....                                                                 | 45 |
| Difluoromethyl-SC-58125 .....                                                                                  | 45 |
| Hydroquinidine 4-difluoromethylbenzoate .....                                                                  | 46 |
| Syntheses of <sup>18</sup> F-Difluoromethylarenes .....                                                        | 48 |
| General Methods for Radioisotope Preparation .....                                                             | 48 |
| General Methods for Analysis of Radiofluorination Reactions .....                                              | 48 |
| Table S2. Optimization of <sup>18</sup> F-Labeling Conditions .....                                            | 49 |
| General Procedure for Syntheses of <sup>18</sup> F-Difluoromethylarenes .....                                  | 50 |
| Method of the RCY determination by SPE .....                                                                   | 50 |
| [ <sup>18</sup> F]Difluoromethyl-benzodioxole ([ <sup>18</sup> F] <b>3a</b> ) .....                            | 51 |
| [ <sup>18</sup> F] <i>N</i> -Boc- <i>N</i> -methyl-difluoromethylaniline ([ <sup>18</sup> F] <b>3b</b> ) ..... | 52 |
| [ <sup>18</sup> F]3-Cyanocyclopropyl-difluoromethylbenzene ([ <sup>18</sup> F] <b>3c</b> ) .....               | 53 |
| [ <sup>18</sup> F]3-Isopropanolyl-difluoromethylbenzene ([ <sup>18</sup> F] <b>3d</b> ) .....                  | 54 |
| [ <sup>18</sup> F]3-Chloro-5-(phenylethynyl)-difluoromethylbenzene ([ <sup>18</sup> F] <b>3e</b> ) .....       | 55 |
| [ <sup>18</sup> F]4-Pyrazolyl-difluoromethylbenzene ([ <sup>18</sup> F] <b>3f</b> ) .....                      | 56 |
| [ <sup>18</sup> F]3-Morpholino-difluoromethylbenzene ([ <sup>18</sup> F] <b>3g</b> ) .....                     | 57 |
| [ <sup>18</sup> F]3-Nitro-difluoromethylbenzene ([ <sup>18</sup> F] <b>3h</b> ) .....                          | 58 |

|                                                                                                    |    |
|----------------------------------------------------------------------------------------------------|----|
| [ <sup>18</sup> F]2-Difluoromethylfluoren-9-one ([ <sup>18</sup> F]3i) .....                       | 59 |
| [ <sup>18</sup> F]Ethyl 4-difluoromethyl-benzoate ([ <sup>18</sup> F]3j) .....                     | 60 |
| [ <sup>18</sup> F]3-Difluoromethyl-benzoaldehyde ([ <sup>18</sup> F]3k) .....                      | 61 |
| [ <sup>18</sup> F]2-Chlorophenyl-(4-difluoromethyl)phenyl-methanone ([ <sup>18</sup> F]3l) .....   | 62 |
| [ <sup>18</sup> F]6-Difluoromethylquinoline ([ <sup>18</sup> F]3m) .....                           | 63 |
| [ <sup>18</sup> F]5-Difluoromethyl-2-methylbenzo[d]thiazole ([ <sup>18</sup> F]3n) .....           | 64 |
| [ <sup>18</sup> F]3-Difluoromethylpyridine ([ <sup>18</sup> F]3o) .....                            | 65 |
| [ <sup>18</sup> F]3-Difluoromethylquinoline ([ <sup>18</sup> F]3p) .....                           | 66 |
| [ <sup>18</sup> F]Difluoromethyl-fenofibrate .....                                                 | 67 |
| [ <sup>18</sup> F]Difluoromethyl-DAA1106 .....                                                     | 68 |
| [ <sup>18</sup> F]Difluoromethyl-estrone .....                                                     | 69 |
| [ <sup>18</sup> F]Difluoromethyl-claritin .....                                                    | 70 |
| [ <sup>18</sup> F]Difluoromethyl-analepticon .....                                                 | 71 |
| [ <sup>18</sup> F]Difluoromethyl-fluoxetine .....                                                  | 72 |
| [ <sup>18</sup> F]Difluoromethyl-SC-58125 .....                                                    | 73 |
| [ <sup>18</sup> F]4-Morpholinomethyl-difluoromethylbenzene ([ <sup>18</sup> F]3q) .....            | 74 |
| [ <sup>18</sup> F]Hydroquinidine 4-difluoromethylbenzoate .....                                    | 75 |
| HPLC Separation .....                                                                              | 76 |
| Table S3 .....                                                                                     | 77 |
| [ <sup>18</sup> F]6-Difluoromethylquinoline ([ <sup>18</sup> F]3m) .....                           | 77 |
| [ <sup>18</sup> F]Difluoromethyl-fenofibrate .....                                                 | 79 |
| [ <sup>18</sup> F]Difluoromethyl-SC-58125 .....                                                    | 81 |
| Specific Activity of [ <sup>18</sup> F]3m (General Method) .....                                   | 83 |
| Improvement of Specific Activity .....                                                             | 85 |
| References .....                                                                                   | 87 |
| <sup>1</sup> H NMR of (Methylenedioxy)phenyl-fluoroacetophenone ( <b>2a</b> ) .....                | 88 |
| <sup>19</sup> F NMR of (Methylenedioxy)phenyl-fluoroacetophenone ( <b>2a</b> ) .....               | 89 |
| <sup>13</sup> C NMR of (Methylenedioxy)phenyl-fluoroacetophenone ( <b>2a</b> ) .....               | 90 |
| <sup>1</sup> H NMR of (4- <i>N</i> -Boc-methylamino)phenyl-fluoroacetophenone ( <b>2b</b> ) .....  | 91 |
| <sup>19</sup> F NMR of (4- <i>N</i> -Boc-methylamino)phenyl-fluoroacetophenone ( <b>2b</b> ) ..... | 92 |
| <sup>13</sup> C NMR of (4- <i>N</i> -Boc-methylamino)phenyl-fluoroacetophenone ( <b>2b</b> ) ..... | 93 |
| <sup>1</sup> H NMR of (3-Hydroxypropanyl)phenyl-fluoroacetophenone ( <b>2c</b> ) .....             | 94 |
| <sup>19</sup> F NMR of (3-Hydroxypropanyl)phenyl-fluoroacetophenone ( <b>2c</b> ) .....            | 95 |
| <sup>13</sup> C NMR of (3-Hydroxypropanyl)phenyl-fluoroacetophenone ( <b>2c</b> ) .....            | 96 |
| <sup>1</sup> H NMR of (3-Hydroxypropanyl)phenyl-fluoroacetophenone ( <b>2d</b> ) .....             | 97 |

---

|                                                                                                   |     |
|---------------------------------------------------------------------------------------------------|-----|
| <sup>19</sup> F NMR of (3-Hydroxypropanyl)phenyl-fluoroacetophenone ( <b>2d</b> ) .....           | 98  |
| <sup>13</sup> C NMR of (3-Hydroxypropanyl)phenyl-fluoroacetophenone ( <b>2d</b> ).....            | 99  |
| <sup>1</sup> H NMR of 1-Bromo-3-chloro-5-(phenylethynyl)benzene ( <b>S11</b> ).....               | 100 |
| <sup>13</sup> C NMR of 1-Bromo-3-chloro-5-(phenylethynyl)benzene ( <b>S11</b> ) .....             | 101 |
| <sup>1</sup> H NMR of (3-Phenylacetylenyl-5-chlorophenyl)-fluoroacetophenone ( <b>2e</b> ) .....  | 102 |
| <sup>19</sup> F NMR of (3-Phenylacetylenyl-5-chlorophenyl)-fluoroacetophenone ( <b>2e</b> ) ..... | 103 |
| <sup>13</sup> C NMR of (3-Phenylacetylenyl-5-chlorophenyl)-fluoroacetophenone ( <b>2e</b> ).....  | 104 |
| <sup>1</sup> H NMR of (4-Pyrazolyl)phenyl-fluoroacetophenone ( <b>2f</b> ).....                   | 105 |
| <sup>19</sup> F NMR of (4-Pyrazolyl)phenyl-fluoroacetophenone ( <b>2f</b> ).....                  | 106 |
| <sup>13</sup> C NMR of (4-Pyrazolyl)phenyl-fluoroacetophenone ( <b>2f</b> ) .....                 | 107 |
| <sup>1</sup> H NMR of (3-Morpholino)phenyl-fluoroacetophenone ( <b>2g</b> ) .....                 | 108 |
| <sup>19</sup> F NMR of (3-Morpholino)phenyl-fluoroacetophenone ( <b>2g</b> ) .....                | 109 |
| <sup>13</sup> C NMR of (3-Morpholino)phenyl-fluoroacetophenone ( <b>2g</b> ).....                 | 110 |
| <sup>1</sup> H NMR of (3-Nitro)phenyl-fluoroacetophenone ( <b>2h</b> ).....                       | 111 |
| <sup>19</sup> F NMR of (3-Nitro)phenyl-fluoroacetophenone ( <b>2h</b> ).....                      | 112 |
| <sup>13</sup> C NMR of (3-Nitro)phenyl-fluoroacetophenone ( <b>2h</b> ) .....                     | 113 |
| <sup>1</sup> H NMR of Fluoren-9-onyl-fluoroacetophenone ( <b>2i</b> ) .....                       | 114 |
| <sup>19</sup> F NMR of Fluoren-9-onyl-fluoroacetophenone ( <b>2i</b> ).....                       | 115 |
| <sup>13</sup> C NMR of Fluoren-9-onyl-fluoroacetophenone ( <b>2i</b> ) .....                      | 116 |
| <sup>1</sup> H NMR of (4-Ethyl-carboxyl)phenyl-fluoroacetophenone ( <b>2j</b> ).....              | 117 |
| <sup>19</sup> F NMR of (4-Ethyl-carboxyl)phenyl-fluoroacetophenone ( <b>2j</b> ).....             | 118 |
| <sup>13</sup> C NMR of (4-Ethyl-carboxyl)phenyl-fluoroacetophenone ( <b>2j</b> ) .....            | 119 |
| <sup>1</sup> H NMR of (3-Dioxolanyl)phenyl-fluoroacetophenone ( <b>S1</b> ) .....                 | 120 |
| <sup>19</sup> F NMR of (3-Dioxolanyl)phenyl-fluoroacetophenone ( <b>S1</b> ) .....                | 121 |
| <sup>13</sup> C NMR of (3-Dioxolanyl)phenyl-fluoroacetophenone ( <b>S1</b> ) .....                | 122 |
| <sup>1</sup> H NMR of (3-Formyl)phenyl-fluoroacetophenone ( <b>2k</b> ) .....                     | 123 |
| <sup>19</sup> F NMR of (3-Formyl)phenyl-fluoroacetophenone ( <b>2k</b> ) .....                    | 124 |
| <sup>13</sup> C NMR of (3-Formyl)phenyl-fluoroacetophenone ( <b>2k</b> ) .....                    | 125 |
| <sup>1</sup> H NMR of (2-Chlorophenylmethanonyl)phenyl-fluoroacetophenone ( <b>2l</b> ) .....     | 126 |

|                                                                                                |     |
|------------------------------------------------------------------------------------------------|-----|
| <sup>19</sup> F NMR of (2-Chlorophenylmethanonyl)phenyl-fluoroacetophenone ( <b>2l</b> ).....  | 127 |
| <sup>13</sup> C NMR of (2-Chlorophenylmethanonyl)phenyl-fluoroacetophenone ( <b>2l</b> ) ..... | 128 |
| <sup>1</sup> H NMR of Quinoline-6-fluoroacetophenone ( <b>2m</b> ) .....                       | 129 |
| <sup>19</sup> F NMR of Quinoline-6-fluoroacetophenone ( <b>2m</b> ) .....                      | 130 |
| <sup>13</sup> C NMR of Quinoline-6-fluoroacetophenone ( <b>2m</b> ).....                       | 131 |
| <sup>1</sup> H NMR of (2-Methylbenzo[d]thiazol-5-yl)-fluoroacetophenone ( <b>2n</b> ).....     | 132 |
| <sup>19</sup> F NMR of (2-Methylbenzo[d]thiazol-5-yl)-fluoroacetophenone ( <b>2n</b> ).....    | 133 |
| <sup>13</sup> C NMR of (2-Methylbenzo[d]thiazol-5-yl)-fluoroacetophenone ( <b>2n</b> ).....    | 134 |
| <sup>1</sup> H NMR of Pyridine-3-fluoroacetophenone ( <b>2o</b> ) .....                        | 135 |
| <sup>19</sup> F NMR of Pyridine-3-fluoroacetophenone ( <b>2o</b> ) .....                       | 136 |
| <sup>13</sup> C NMR of Pyridine-3-fluoroacetophenone ( <b>2o</b> ) .....                       | 137 |
| <sup>1</sup> H NMR of Quinoline-3-fluoroacetophenone ( <b>2p</b> ).....                        | 138 |
| <sup>19</sup> F NMR of Quinoline-3-fluoroacetophenone ( <b>2p</b> ) .....                      | 139 |
| <sup>13</sup> C NMR of Quinoline-3-fluoroacetophenone ( <b>2p</b> ).....                       | 140 |
| <sup>1</sup> H NMR of (3-Morpholinomethyl)phenyl-fluoroacetophenone ( <b>2q</b> ).....         | 141 |
| <sup>19</sup> F NMR of (3-Morpholinomethyl)phenyl-fluoroacetophenone ( <b>2q</b> ).....        | 142 |
| <sup>13</sup> C NMR of (3-Morpholinomethyl)phenyl-fluoroacetophenone ( <b>2q</b> ) .....       | 143 |
| <sup>1</sup> H NMR of Mesitylenyl-fluoroacetophenone ( <b>2s</b> ).....                        | 144 |
| <sup>19</sup> F NMR of Mesitylenyl-fluoroacetophenone ( <b>2s</b> ) .....                      | 145 |
| <sup>13</sup> C NMR of Mesitylenyl-fluoroacetophenone ( <b>2s</b> ).....                       | 146 |
| <sup>1</sup> H NMR of (3-Chloro)phenyl-fluoroacetophenone ( <b>S2</b> ) .....                  | 147 |
| <sup>19</sup> F NMR of (3-Chloro)phenyl-fluoroacetophenone ( <b>S2</b> ).....                  | 148 |
| <sup>13</sup> C NMR of (3-Chloro)phenyl-fluoroacetophenone ( <b>S2</b> ) .....                 | 149 |
| <sup>1</sup> H NMR of (1-Fluoro-2-oxo-2-phenylethyl)-fenofibrate ( <b>S2</b> ) .....           | 150 |
| <sup>19</sup> F NMR of (1-Fluoro-2-oxo-2-phenylethyl)-fenofibrate ( <b>S2</b> ) .....          | 151 |
| <sup>13</sup> C NMR of (1-Fluoro-2-oxo-2-phenylethyl)-fenofibrate ( <b>S2</b> ).....           | 152 |
| <sup>1</sup> H NMR of (1-Fluoro-2-oxo-2-phenylethyl)-DAA1106 ( <b>S3</b> ) .....               | 153 |
| <sup>19</sup> F NMR of (1-Fluoro-2-oxo-2-phenylethyl)-DAA1106 ( <b>S3</b> ).....               | 154 |
| <sup>13</sup> C NMR of (1-Fluoro-2-oxo-2-phenylethyl)-DAA1106 ( <b>S3</b> ).....               | 155 |

|                                                                                                     |     |
|-----------------------------------------------------------------------------------------------------|-----|
| <sup>1</sup> H NMR of (1-Fluoro-2-oxo-2-phenylethyl)-estrone ( <b>S4</b> ) .....                    | 156 |
| <sup>19</sup> F NMR of (1-Fluoro-2-oxo-2-phenylethyl)-estrone ( <b>S4</b> ) .....                   | 157 |
| <sup>13</sup> C NMR of (1-Fluoro-2-oxo-2-phenylethyl)-estrone ( <b>S4</b> ) .....                   | 158 |
| <sup>1</sup> H NMR of (1-Fluoro-2-oxo-2-phenylethyl)-claritin ( <b>S5</b> ) .....                   | 159 |
| <sup>19</sup> F NMR of (1-Fluoro-2-oxo-2-phenylethyl)-claritin ( <b>S5</b> ) .....                  | 160 |
| <sup>13</sup> C NMR of (1-Fluoro-2-oxo-2-phenylethyl)-claritin ( <b>S5</b> ).....                   | 161 |
| <sup>1</sup> H NMR of 4-Bromo- <i>N,N</i> -diethyl-3-methoxybenzamide ( <b>S12</b> ).....           | 162 |
| <sup>13</sup> C NMR of 4-Bromo- <i>N,N</i> -diethyl-3-methoxybenzamide ( <b>S12</b> ) .....         | 163 |
| <sup>1</sup> H NMR of (1-Fluoro-2-oxo-2-phenylethyl)-analepticon ( <b>S6</b> ).....                 | 164 |
| <sup>19</sup> F NMR of (1-Fluoro-2-oxo-2-phenylethyl)-analepticon ( <b>S6</b> ) .....               | 165 |
| <sup>13</sup> C NMR of (1-Fluoro-2-oxo-2-phenylethyl)-analepticon ( <b>S6</b> ).....                | 166 |
| <sup>1</sup> H NMR of (1-Fluoro-2-oxo-2-phenylethyl)- <i>N</i> -Boc-fluoxetine ( <b>S7</b> ).....   | 167 |
| <sup>19</sup> F NMR of (1-Fluoro-2-oxo-2-phenylethyl)- <i>N</i> -Boc-fluoxetine ( <b>S7</b> ).....  | 168 |
| <sup>13</sup> C NMR of (1-Fluoro-2-oxo-2-phenylethyl)- <i>N</i> -Boc-fluoxetine ( <b>S7</b> ) ..... | 169 |
| <sup>1</sup> H NMR of (1-Fluoro-2-oxo-2-phenylethyl)-SC-58125 ( <b>S8</b> ) .....                   | 170 |
| <sup>19</sup> F NMR of (1-Fluoro-2-oxo-2-phenylethyl)-SC-58125 ( <b>S8</b> ) .....                  | 171 |
| <sup>13</sup> C NMR of (1-Fluoro-2-oxo-2-phenylethyl)-SC-58125 ( <b>S8</b> ).....                   | 172 |
| <sup>1</sup> H NMR of Hydroquinidine 4-(1-Fluoro-2-oxo-2-phenylethyl)-benzoate ( <b>S9</b> ) .....  | 173 |
| <sup>19</sup> F NMR of Hydroquinidine 4-(1-Fluoro-2-oxo-2-phenylethyl)-benzoate ( <b>S9</b> ) ..... | 174 |
| <sup>13</sup> C NMR of Hydroquinidine 4-(1-Fluoro-2-oxo-2-phenylethyl)-benzoate ( <b>S9</b> ).....  | 175 |
| <sup>1</sup> H NMR of Phenyl-bromo-fluoroacetophenone ( <b>2r'</b> ).....                           | 176 |
| <sup>19</sup> F NMR of Phenyl-bromo-fluoroacetophenone ( <b>2r'</b> ).....                          | 177 |
| <sup>13</sup> C NMR of Phenyl-bromo-fluoroacetophenone ( <b>2r'</b> ).....                          | 178 |
| <sup>1</sup> H NMR of Quinoline-6-bromo-fluoroacetophenone ( <b>2m'</b> ).....                      | 179 |
| <sup>19</sup> F NMR of Quinoline-6-bromo-fluoroacetophenone ( <b>2m'</b> ).....                     | 180 |
| <sup>13</sup> C NMR of Quinoline-6-bromo-fluoroacetophenone ( <b>2m'</b> ) .....                    | 181 |
| <sup>1</sup> H NMR of Difluoromethyl-benzodioxole ( <b>3a</b> ) .....                               | 182 |
| <sup>19</sup> F NMR of Difluoromethyl-benzodioxole ( <b>3a</b> ) .....                              | 183 |
| <sup>13</sup> C NMR of Difluoromethyl-benzodioxole ( <b>3a</b> ).....                               | 184 |

|                                                                                             |     |
|---------------------------------------------------------------------------------------------|-----|
| <sup>1</sup> H NMR of 3-Cyanocyclopropyl-difluoromethylbenzene ( <b>3c</b> ).....           | 185 |
| <sup>19</sup> F NMR of 3-Cyanocyclopropyl-difluoromethylbenzene ( <b>3c</b> ).....          | 186 |
| <sup>13</sup> C NMR of 3-Cyanocyclopropyl-difluoromethylbenzene ( <b>3c</b> ).....          | 187 |
| <sup>1</sup> H NMR of 3-Isopropanolyl-difluoromethylbenzene ( <b>3d</b> ).....              | 188 |
| <sup>19</sup> F NMR of 3-Isopropanolyl-difluoromethylbenzene ( <b>3d</b> ).....             | 189 |
| <sup>13</sup> C NMR of 3-Isopropanolyl-difluoromethylbenzene ( <b>3d</b> ).....             | 190 |
| <sup>1</sup> H NMR of 3-Chloro-5-(phenylethynyl)-difluoromethylbenzene ( <b>3e</b> ).....   | 191 |
| <sup>19</sup> F NMR of 3-Chloro-5-(phenylethynyl)-difluoromethylbenzene ( <b>3e</b> ).....  | 192 |
| <sup>13</sup> C NMR of 3-Chloro-5-(phenylethynyl)-difluoromethylbenzene ( <b>3e</b> ).....  | 193 |
| <sup>1</sup> H NMR of 4-Pyrazolyl-difluoromethylbenzene ( <b>3f</b> ).....                  | 194 |
| <sup>19</sup> F NMR of 4-Pyrazolyl-difluoromethylbenzene ( <b>3f</b> ).....                 | 195 |
| <sup>13</sup> C NMR of 4-Pyrazolyl-difluoromethylbenzene ( <b>3f</b> ).....                 | 196 |
| <sup>1</sup> H NMR of 3-Morpholino-difluoromethylbenzene ( <b>3g</b> ).....                 | 197 |
| <sup>19</sup> F NMR of 3-Morpholino-difluoromethylbenzene ( <b>3g</b> ).....                | 198 |
| <sup>13</sup> C NMR of 3-Morpholino-difluoromethylbenzene ( <b>3g</b> ).....                | 199 |
| <sup>1</sup> H NMR of 2-Difluoromethylfluoren-9-one ( <b>3i</b> ).....                      | 200 |
| <sup>19</sup> F NMR of 2-Difluoromethylfluoren-9-one ( <b>3i</b> ).....                     | 201 |
| <sup>13</sup> C NMR of 2-Difluoromethylfluoren-9-one ( <b>3i</b> ).....                     | 202 |
| <sup>1</sup> H NMR of 2-Chlorophenyl-(4-difluoromethyl)phenyl-methanone ( <b>3l</b> ).....  | 203 |
| <sup>19</sup> F NMR of 2-Chlorophenyl-(4-difluoromethyl)phenyl-methanone ( <b>3l</b> )..... | 204 |
| <sup>13</sup> C NMR of 2-Chlorophenyl-(4-difluoromethyl)phenyl-methanone ( <b>3l</b> )..... | 205 |
| <sup>1</sup> H NMR of 5-Difluoromethyl-2-methylbenzo[d]thiazole ( <b>3n</b> ).....          | 206 |
| <sup>19</sup> F NMR of 5-Difluoromethyl-2-methylbenzo[d]thiazole ( <b>3n</b> ).....         | 207 |
| <sup>13</sup> C NMR of 5-Difluoromethyl-2-methylbenzo[d]thiazole ( <b>3n</b> ).....         | 208 |
| <sup>1</sup> H NMR of 3-Difluoromethylquinoline ( <b>3p</b> ).....                          | 209 |
| <sup>19</sup> F NMR of 3-Difluoromethylquinoline ( <b>3p</b> ).....                         | 210 |
| <sup>13</sup> C NMR of 3-Difluoromethylquinoline ( <b>3p</b> ).....                         | 211 |
| <sup>1</sup> H NMR of 4-Morpholinomethyl-difluoromethylbenzene ( <b>3q</b> ).....           | 212 |
| <sup>19</sup> F NMR of 4-Morpholinomethyl-difluoromethylbenzene ( <b>3q</b> ).....          | 213 |

---

|                                                                                     |     |
|-------------------------------------------------------------------------------------|-----|
| <sup>13</sup> C NMR of 4-Morpholinomethyl-difluoromethylbenzene ( <b>3q</b> ) ..... | 214 |
| <sup>1</sup> H NMR of Difluoromethyl-fenofibrate .....                              | 215 |
| <sup>19</sup> F NMR of Difluoromethyl-fenofibrate .....                             | 216 |
| <sup>13</sup> C NMR of Difluoromethyl-fenofibrate .....                             | 217 |
| <sup>1</sup> H NMR of Difluoromethyl-DAA1106 .....                                  | 218 |
| <sup>19</sup> F NMR of Difluoromethyl-DAA1106 .....                                 | 219 |
| <sup>13</sup> C NMR of Difluoromethyl-DAA1106 .....                                 | 220 |
| <sup>1</sup> H NMR of Difluoromethyl-estrone .....                                  | 221 |
| <sup>19</sup> F NMR of Difluoromethyl-estrone .....                                 | 222 |
| <sup>13</sup> C NMR of Difluoromethyl-estrone .....                                 | 223 |
| <sup>1</sup> H NMR of Difluoromethyl-claritin .....                                 | 224 |
| <sup>19</sup> F NMR of Difluoromethyl-claritin .....                                | 225 |
| <sup>13</sup> C NMR of Difluoromethyl-claritin .....                                | 226 |
| <sup>1</sup> H NMR of Difluoromethyl- <i>N</i> -Boc-fluoxetine .....                | 227 |
| <sup>19</sup> F NMR of Difluoromethyl- <i>N</i> -Boc-fluoxetine .....               | 228 |
| <sup>13</sup> C NMR of Difluoromethyl- <i>N</i> -Boc-fluoxetine .....               | 229 |
| <sup>1</sup> H NMR of Difluoromethyl-SC-58125 .....                                 | 230 |
| <sup>19</sup> F NMR of Difluoromethyl-SC-58125 .....                                | 231 |
| <sup>13</sup> C NMR of Difluoromethyl-SC-58125 .....                                | 232 |
| <sup>1</sup> H NMR of Hydroquinidine 4-difluoromethylbenzoate .....                 | 233 |
| <sup>19</sup> F NMR of Hydroquinidine 4-difluoromethylbenzoate .....                | 234 |
| <sup>13</sup> C NMR of Hydroquinidine 4-difluoromethylbenzoate .....                | 235 |



## MATERIALS AND METHODS

All manipulations were performed using flame-dried glassware and standard Schlenk techniques under an atmosphere of nitrogen, unless otherwise stated.

### Solvents

Dry toluene, tetrahydrofuran, acetonitrile, dichloromethane, methanol, chlorobenzene and benzene were purchased from Sigma-Aldrich. Chloroform- $d_1$  was purchased from Cambridge Isotope Laboratories.

### Chromatography

Thin layer chromatography (TLC) was performed using EMD TLC plates pre-coated with 250  $\mu\text{m}$  thickness silica gel 60 F<sub>254</sub> plates and visualized by fluorescence quenching under UV light and KMnO<sub>4</sub> stain. Flash chromatography was performed using silica gel (230-400 mesh) purchased from Silicycle Inc.

### Spectroscopy and Instruments

NMR spectra were recorded on a Varian Unity/Inova 500 spectrometer operating at 500 MHz, 470 MHz and 125 MHz for <sup>1</sup>H, <sup>19</sup>F and <sup>13</sup>C acquisitions. Chemical shifts are reported in ppm with the solvent resonance as the internal standard. For <sup>1</sup>H NMR: CDCl<sub>3</sub>,  $\delta$  7.26; For <sup>13</sup>C NMR: CDCl<sub>3</sub>,  $\delta$  77.16. <sup>19</sup>F chemical shifts were externally referenced with 1-fluoro-3-nitrobenzene ( $\delta = -112.0$ ). Data is reported as follows: s = singlet, d = doublet, t = triplet, q = quartet, sep = septet, m = multiplet, br = broad; coupling constants in Hz; integration.

### Starting materials

All substrates were used as received from commercial suppliers, unless otherwise stated. XPhos-Pd-G2, Pd(dba)<sub>2</sub>, Ad<sub>2</sub><sup>n</sup>BuP-Pd-G2, Ad<sub>2</sub><sup>n</sup>BuP were purchased from Sigma-Aldrich. 2-Fluoroacetophenone was purchased from Combi-Blocks. 2,2-difluoroacetophenone was purchased from Alfa Aesar. 2-Phenyl-2-fluoro-acetophenone<sup>1</sup>, *N*-Boc-*N*-methyl-difluoromethylaniline<sup>2</sup>, (6-difluoromethyl)quinoline<sup>2</sup>, and CHF<sub>2</sub>-analepticon<sup>3</sup> were prepared according to a literature procedure

## EXPERIMENTAL DATA

## Syntheses of Labeling Precursors

Table S1. Pd-catalyzed fluoroacetophenonation of arenes

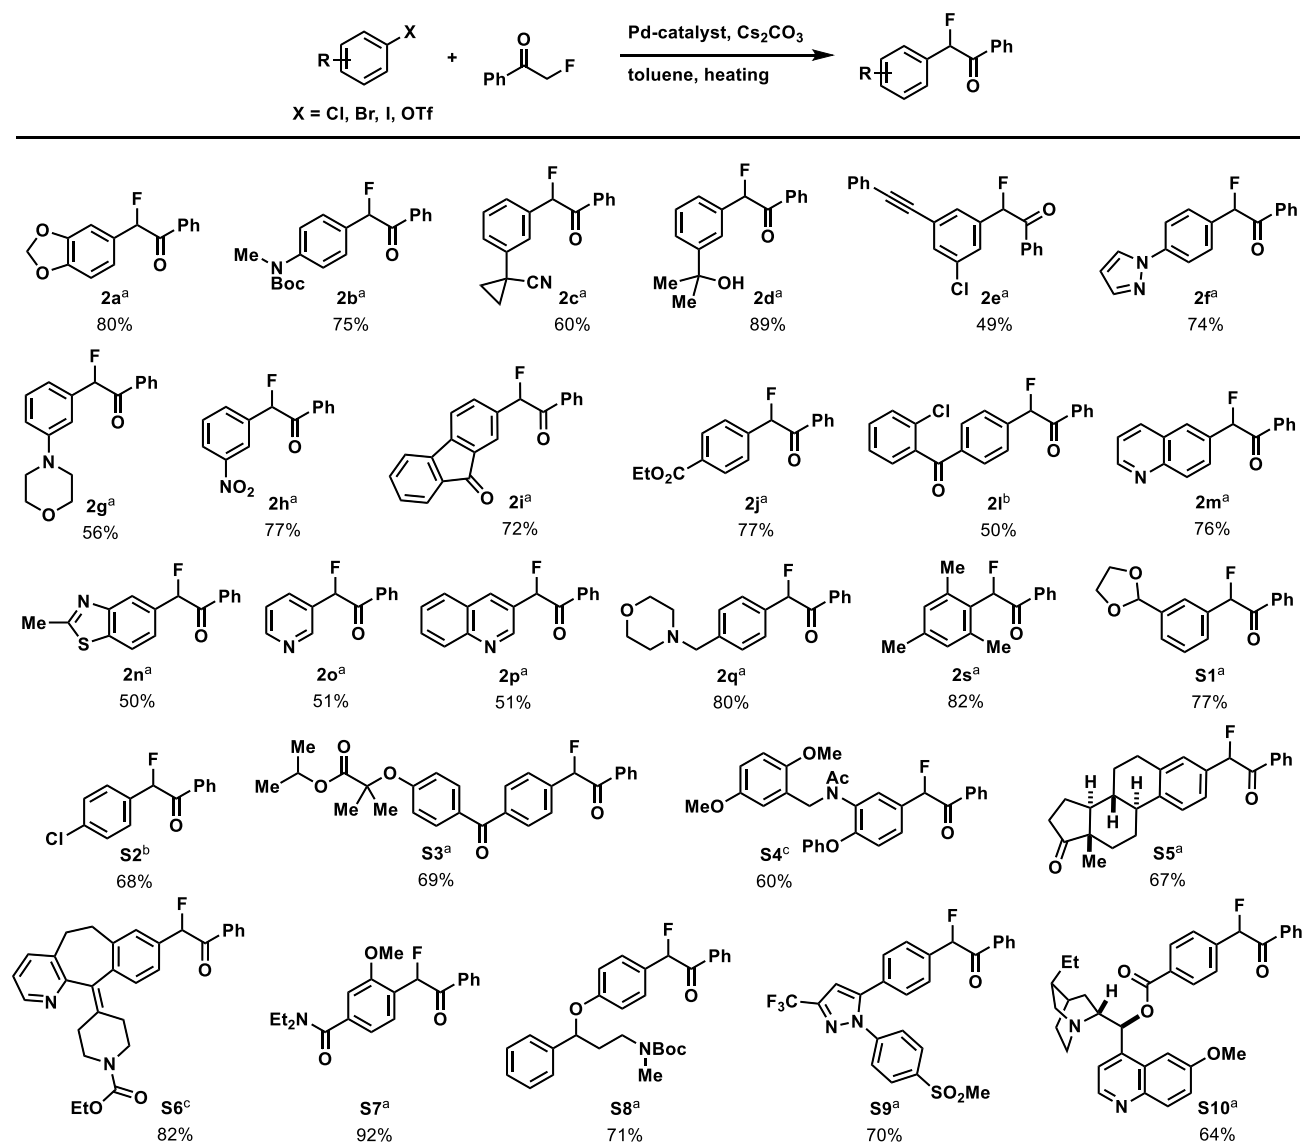

General conditions: (a) arene (1 mmol, 1 equiv.), XPhos-Pd-G2 (3 mol%), fluoroacetophenone (1.2 equiv.), Cs<sub>2</sub>CO<sub>3</sub> (1.5 equiv.), toluene (0.2 M), 100 °C. (b) 80 °C. (c) Ad<sub>2</sub><sup>n</sup>BuP-Pd-G2 (3 mol%).

### General procedure of Pd-catalyzed fluoroacetophenonation

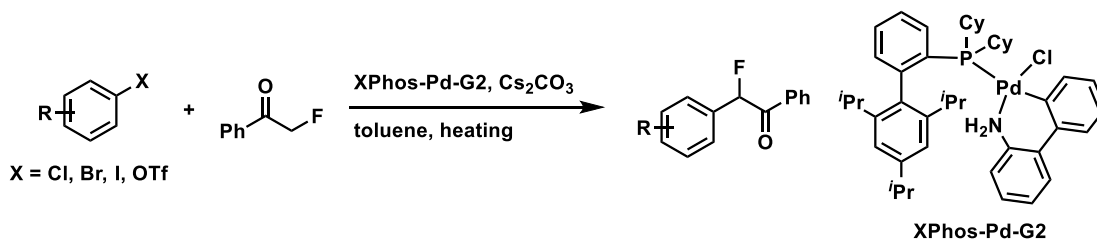

Arene (1.00 mmol, 1.00 equiv), XPhos-Pd-G2 (23.6 mg, 30.0  $\mu$ mol, 3.00 mol%) and  $\text{Cs}_2\text{CO}_3$  (489 mg, 1.50 mmol, 1.50 equiv.) were added to a flame-dried Schlenk tube. The Schlenk tube was evacuated and back-filled with nitrogen (3  $\times$ ). Toluene (5 mL) and 2-fluoroacetophenone (145  $\mu$ L, 1.20 mmol, 1.20 equiv.) were added to the mixture. The Schlenk tube was immersed into a pre-heated oil bath at 100  $^\circ\text{C}$ . After 13 to 20 hours, the oil bath was removed, and the Schlenk tube was allowed to cool to room temperature. The reaction mixture was filtered through Celite and eluted with EtOAc (3  $\times$  4 mL). The filtrate was evaporated under reduced pressure. Purification by flash silica gel column chromatography afforded the title compound.

### (Methylenedioxy)phenyl-fluoroacetophenone (2a)

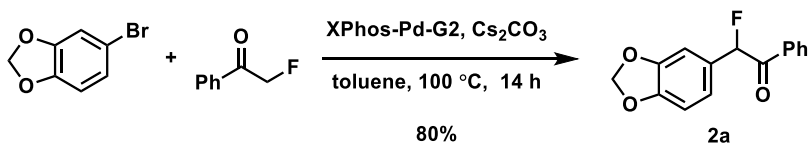

XPhos-Pd-G2 (47.3 mg, 60.0  $\mu$ mol, 3.00 mol%) and  $\text{Cs}_2\text{CO}_3$  (978 mg, 3.00 mmol, 1.50 equiv.) were added to a flame-dried Schlenk tube. The Schlenk tube was evacuated and back-filled with nitrogen (3  $\times$ ). Toluene (10 mL), 1-bromo-3,4-(methylenedioxy)benzene (241  $\mu$ L, 2.00 mmol, 1.00 equiv.) and 2-fluoroacetophenone (291  $\mu$ L, 2.40 mmol, 1.20 equiv.) were added to the mixture. The Schlenk tube was immersed into a pre-heated oil bath at 100  $^\circ\text{C}$ . After 14 h, the oil bath was removed, and the Schlenk tube was allowed to cool to room temperature. The reaction mixture was filtered through Celite and eluted with EtOAc (3  $\times$  8 mL). The filtrate was evaporated under reduced pressure. Purification by flash silica gel column chromatography (hexanes/EtOAc = 15:1 to 8:1 v/v) afforded 410 mg of the title compound as an off-white solid (80% yield).

$R_f$  = 0.45 (hexanes/EtOAc = 4:1 v/v).

### NMR Spectroscopy:

**$^1\text{H}$  NMR** (500 MHz,  $\text{CDCl}_3$ , 24  $^\circ\text{C}$ ,  $\delta$ ): 7.92 (dd,  $J$  = 8.4, 1.4 Hz, 2H), 7.54 (t,  $J$  = 7.5 Hz, 1H), 7.41 (t,  $J$  = 7.9 Hz, 2H), 6.97 (dt,  $J$  = 8.0, 2.1 Hz, 1H), 6.93 (s, 1H), 6.80 (d,  $J$  = 8.0 Hz, 1H), 6.44 (d,  $J$  = 48.6 Hz, 1H), 5.95 (d,  $J$  = 1.4 Hz, 1H), 5.94 (d,  $J$  = 1.4 Hz, 1H).

**$^{13}\text{C}$  NMR** (125 MHz,  $\text{CDCl}_3$ , 25  $^\circ\text{C}$ ,  $\delta$ ): 194.1 (d,  $J$  = 21.1 Hz), 149.0 (d,  $J$  = 3.0 Hz), 148.4, 134.1, 133.9, 129.0 (d,  $J$  = 2.3 Hz), 128.8, 127.9 (d,  $J$  = 20.3 Hz), 122.4 (d,  $J$  = 6.1 Hz), 108.9 (d,  $J$  = 1.4 Hz), 108.0 (d,  $J$  = 4.6 Hz), 101.6, 93.4 (d,  $J$  = 185.9 Hz).

$^{19}\text{F}$  NMR (470 MHz,  $\text{CDCl}_3$ , 24 °C,  $\delta$ ): -174.5 (d,  $J$  = 48.9 Hz).

HRMS-FIA( $m/z$ ) calc'd for  $\text{C}_{15}\text{H}_{11}\text{FNaO}_3$  [ $\text{M}+\text{Na}$ ] $^+$ : 281.0584; found: 281.0572.

#### (4-*N*-Boc-methylamino)phenyl-fluoroacetophenone (2b)

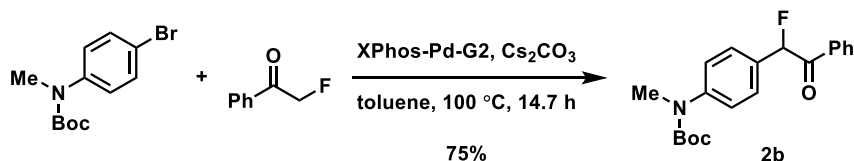

4-Bromo-*N*-Boc-methylaniline (286 mg, 1.00 mmol, 1.00 equiv.), XPhos-Pd-G2 (23.6 mg, 30.0  $\mu\text{mol}$ , 3.00 mol%) and  $\text{Cs}_2\text{CO}_3$  (489 mg, 1.50 mmol, 1.50 equiv.) were added to a flame-dried Schlenk tube. The Schlenk tube was evacuated and back-filled with nitrogen (3  $\times$ ). Toluene (5 mL) and 2-fluoroacetophenone (145  $\mu\text{L}$ , 1.20 mmol, 1.20 equiv.) were added to the mixture. The Schlenk tube was immersed into a pre-heated oil bath at 100 °C. After 14.7 h, the oil bath was removed, and the Schlenk tube was allowed to cool to room temperature. The reaction mixture was filtered through Celite and eluted with EtOAc (3  $\times$  4 mL). The filtrate was evaporated under reduced pressure. Purification by flash silica gel column chromatography (hexanes/EtOAc = 3:1 v/v) afforded 257 mg of the title compound as an orange liquid (75% yield).

$R_f$  = 0.15 (hexanes/EtOAc = 8:1 v/v).

#### NMR Spectroscopy:

$^1\text{H}$  NMR (500 MHz,  $\text{CDCl}_3$ , 25 °C,  $\delta$ ): 7.94 (d,  $J$  = 8.0 Hz, 2H), 7.58 (t,  $J$  = 7.5 Hz, 1H), 7.45 (t,  $J$  = 8.0 Hz, 2H), 7.40–7.37 (m, 3H), 7.35–7.33 (m, 1H), 6.50 (d,  $J$  = 48.5 Hz), 1.74 (dd,  $J$  = 7.0 Hz, 4.5 Hz, 2H), 1.40 (dd,  $J$  = 7.0 Hz, 4.5 Hz, 2H).

$^{13}\text{C}$  NMR (125 MHz,  $\text{CDCl}_3$ , 25 °C,  $\delta$ ): 194.2 (d,  $J$  = 21.1 Hz), 154.6, 145.1 (d,  $J$  = 2.8 Hz), 134.1, 133.9, 130.8 (d,  $J$  = 20.2 Hz), 129.2 (d,  $J$  = 2.5 Hz), 128.8, 127.9 (d,  $J$  = 5.3 Hz), 125.7, 93.5 (d,  $J$  = 185.7 Hz), 80.9, 37.1, 28.4.

$^{19}\text{F}$  NMR (470 MHz,  $\text{CDCl}_3$ , 25 °C,  $\delta$ ): -180.2 (d,  $J$  = 48.0 Hz).

HRMS-FIA( $m/z$ ) calc'd for  $\text{C}_{20}\text{H}_{22}\text{FKNO}_3$  [ $\text{M}+\text{K}$ ] $^+$ : 382.1215; found: 382.1226.

#### (3-Cyanocyclopropyl)phenyl-fluoroacetophenone (2c)

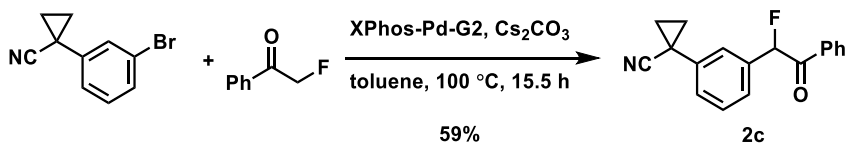

1-(3-Bromophenyl)cyclopropanecarbonitrile (222 mg, 1.00 mmol, 1.00 equiv.), XPhos-Pd-G2 (23.6 mg, 30.0  $\mu\text{mol}$ , 3.00 mol%) and  $\text{Cs}_2\text{CO}_3$  (489 mg, 1.50 mmol, 1.50 equiv.) were added to a flame-dried Schlenk tube. The Schlenk tube was evacuated and back-filled with nitrogen (3  $\times$ ). Toluene (5 mL) and 2-

fluoroacetophenone (145  $\mu$ L, 1.20 mmol, 1.20 equiv.) were added to the mixture. The Schlenk tube was immersed into a pre-heated oil bath at 100  $^{\circ}$ C. After 15.5 h, the oil bath was removed, and the Schlenk tube was allowed to cool to room temperature. The reaction mixture was filtered through Celite and eluted with EtOAc (3  $\times$  4 mL). The filtrate was evaporated under reduced pressure. Purification by flash silica gel column chromatography (hexanes/EtOAc = 3:1 v/v) afforded 166 mg of the title compound as an orange solid (59% yield).

$R_f$  = 0.40 (hexanes/EtOAc = 2:1 v/v).

#### NMR Spectroscopy:

$^1\text{H NMR}$  (500 MHz,  $\text{CDCl}_3$ , 22  $^{\circ}$ C,  $\delta$ ): 7.94 (d,  $J$  = 8.0 Hz, 2H), 7.58 (t,  $J$  = 7.5 Hz, 1H), 7.45 (t,  $J$  = 8.0 Hz, 2H), 7.40–7.37 (m, 3H), 7.35–7.33 (m, 1H), 6.50 (d,  $J$  = 48.5 Hz), 1.74 (dd,  $J$  = 7.0 Hz, 4.5 Hz, 2H), 1.40 (dd,  $J$  = 7.0 Hz, 4.5 Hz, 2H).

$^{13}\text{C NMR}$  (125 MHz,  $\text{CDCl}_3$ , 25  $^{\circ}$ C,  $\delta$ ): 194.1 (d,  $J$  = 21.5 Hz), 137.3, 135.3 (d,  $J$  = 20.5 Hz), 134.1, 134.0, 129.8, 129.2 (d,  $J$  = 3.3 Hz), 128.9, 127.3 (d,  $J$  = 2.1 Hz), 126.5 (d,  $J$  = 5.4 Hz), 124.3 (d,  $J$  = 5.4 Hz), 122.2, 93.6 (d,  $J$  = 187.4 Hz), 18.6, 18.5, 13.9.

$^{19}\text{F NMR}$  (470 MHz,  $\text{CDCl}_3$ , 23  $^{\circ}$ C,  $\delta$ ): –180.2 (d,  $J$  = 48.0 Hz).

HRMS-FIA( $m/z$ ) calc'd for  $\text{C}_{18}\text{H}_{14}\text{FNNaO}$  [ $\text{M}+\text{Na}$ ] $^+$ : 302.0952; found: 302.0941.

#### (3-Hydroxypropenyl)phenyl-fluoroacetophenone (2d)

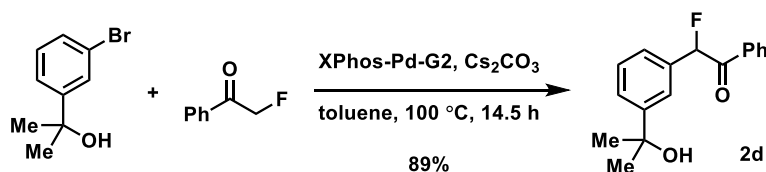

XPhos-Pd-G2 (23.6 mg, 30.0  $\mu$ mol, 3.00 mol%) and  $\text{Cs}_2\text{CO}_3$  (489 mg, 1.50 mmol, 1.50 equiv.) were added to a flame-dried Schlenk tube. The Schlenk tube was evacuated and back-filled with nitrogen (3  $\times$ ). A solution of 2-(3-bromophenyl)propan-2-ol (215 mg, 1.00 mmol, 1.00 equiv.) in toluene (5 mL) and 2-fluoroacetophenone (145  $\mu$ L, 1.20 mmol, 1.20 equiv.) were added to the mixture. The Schlenk tube was immersed into a pre-heated oil bath at 100  $^{\circ}$ C. After 14.5 h, the oil bath was removed, and the Schlenk tube was allowed to cool to room temperature. The reaction mixture was filtered through Celite and eluted with EtOAc (3  $\times$  4 mL). The filtrate was evaporated under reduced pressure. Purification by flash silica gel column chromatography (hexanes/EtOAc = 5:1 v/v to 4/1 v/v) afforded 243 mg of the title compound as a yellow solid (89% yield).

$R_f$  = 0.17 (hexanes/EtOAc = 6:1 v/v).

#### NMR Spectroscopy:

$^1\text{H NMR}$  (500 MHz,  $\text{CDCl}_3$ , 25  $^{\circ}$ C,  $\delta$ ): 7.96 (d,  $J$  = 7.0 Hz, 2H), 7.65 (s, 1H), 7.56 (t,  $J$  = 8.0 Hz, 1H),

7.53–7.50 (m, 1H), 7.44 (t,  $J = 7.5$  Hz, 2H), 7.39–7.37 (m, 2H), 6.53 (d,  $J = 48.5$  Hz, 1H), 1.78 (s, 1H), 1.573 (s, 3H), 1.567 (s, 3H).

$^{13}\text{C}$  NMR (125 MHz,  $\text{CDCl}_3$ , 25 °C,  $\delta$ ): 194.5 (d,  $J = 21.3$  Hz), 150.4, 134.2 (d,  $J = 10.1$  Hz), 134.2, 133.9, 129.2, 129.1 (d,  $J = 13.8$  Hz), 128.8, 126.0 (d,  $J = 3.3$  Hz), 125.8 (d,  $J = 5.3$  Hz), 123.7 (d,  $J = 5.4$  Hz), 93.7 (d,  $J = 29.9$  Hz), 72.5, 31.8, 31.8.

$^{19}\text{F}$  NMR (470 MHz,  $\text{CDCl}_3$ , 25 °C,  $\delta$ ): -178.4 (d,  $J = 48.0$  Hz).

HRMS-FIA( $m/z$ ) calc'd for  $\text{C}_{17}\text{H}_{17}\text{FNaO}_2$  [ $\text{M}+\text{Na}$ ] $^+$ : 295.1105; found: 295.1107.

### 1-Bromo-3-chloro-5-(phenylethynyl)benzene (S11)

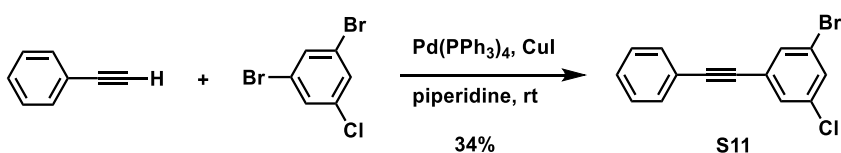

1,3-Dibromo-5-chlorobenzene (3.63 g, 13.4 mmol, 2.03 equiv.), Pd(PPh<sub>3</sub>)<sub>4</sub> (194 mg, 168  $\mu\text{mol}$ , 2.54 mol%) and Cul (61.5 mg, 324  $\mu\text{mol}$ , 4.91 mol%) were added to a flame-dried Schlenk flask. Piperidine (40 mL) and phenylacetylene (725  $\mu\text{L}$ , 6.60 mmol, 1.00 equiv.) were added. The solution was degassed by letting bubbling nitrogen inside for 20 min. The resulting mixture was stirred at room temperature for 24.5 h. The reaction mixture was poured into  $\text{NH}_4\text{Cl}$  aqueous solution (100 mL) and extracted with DCM (3  $\times$  50 mL). The combined organic layers were washed with  $\text{NH}_4\text{Cl}$  aqueous solution (3  $\times$  150 mL) and then dried with  $\text{MgSO}_4$ . After the solvent was removed in vacuo, purification by flash silica gel column chromatography (hexanes) afforded 650 mg of the title compound as a white solid (34% yield).

$R_f = 0.68$  (hexanes).

### NMR Spectroscopy:

$^1\text{H}$  NMR (500 MHz,  $\text{CDCl}_3$ , 25 °C,  $\delta$ ): 7.57 (t,  $J = 1.5$  Hz, 1H), 7.54–7.50 (m, 2H), 7.48 (t,  $J = 1.9$  Hz, 1H), 7.45 (t,  $J = 1.6$  Hz, 1H), 7.40–7.34 (m, 3H).

$^{13}\text{C}$  NMR (125 MHz,  $\text{CDCl}_3$ , 25 °C,  $\delta$ ): 135.1, 132.7, 131.9, 131.4, 130.3, 129.1, 128.6, 126.6, 122.6, 122.4, 92.0, 86.7.

HRMS-FIA( $m/z$ ) calc'd for  $\text{C}_{14}\text{H}_9\text{BrCl}$  [ $\text{M}+\text{H}$ ] $^+$ : 290.9571; found: 290.9566.

### (3-Chloro-5-phenylacetylenyl)phenyl-fluoroacetophenone (2e)

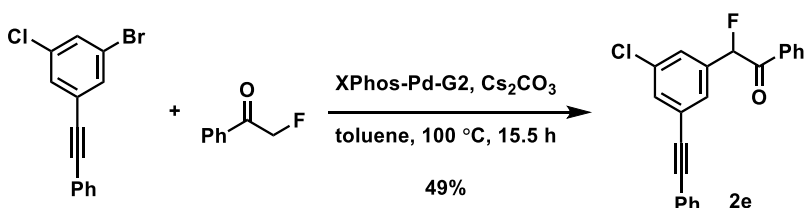

Aryl bromide **S11** (320 mg, 1.00 mmol, 1.00 equiv.), XPhos-Pd-G2 (23.6 mg, 30.0  $\mu$ mol, 3.00 mol%) and  $\text{Cs}_2\text{CO}_3$  (489 mg, 1.50 mmol, 1.50 equiv.) were added to a flame-dried Schlenk tube. The Schlenk tube was evacuated and back-filled with nitrogen (3  $\times$ ). Toluene (5 mL) and 2-fluoroacetophenone (145  $\mu$ L, 1.20 mmol, 1.20 equiv.) were added to the mixture. The Schlenk tube was immersed into a pre-heated oil bath at 100  $^\circ\text{C}$ . After 15.5 h, the oil bath was removed, and the Schlenk tube was allowed to cool to room temperature. The reaction mixture was filtered through Celite and eluted with EtOAc (3  $\times$  4 mL). The filtrate was evaporated under reduced pressure. Purification by flash silica gel column chromatography (hexanes/EtOAc = 8:1 v/v) afforded 171 mg of the title compound as an orange oil (49% yield).

$R_f$  = 0.45 (hexanes/EtOAc = 8:1 v/v).

#### NMR Spectroscopy:

$^1\text{H}$  NMR (500 MHz,  $\text{CDCl}_3$ , 25  $^\circ\text{C}$ ,  $\delta$ ): 7.96 (d,  $J$  = 7.5 Hz, 2H), 7.59 (t,  $J$  = 7.0 Hz, 1H), 7.54 (s, 1H), 7.53–7.51 (m, 3H), 7.49–7.45 (m, 3H), 7.38–7.35 (m, 3H), 6.43 (d,  $J$  = 48.5 Hz, 1H).

$^{13}\text{C}$  NMR (125 MHz,  $\text{CDCl}_3$ , 25  $^\circ\text{C}$ ,  $\delta$ ): 193.7 (d,  $J$  = 22.6 Hz), 136.4 (d,  $J$  = 20.4 Hz), 135.1, 134.3, 133.7, 132.4, 131.8, 129.3 (d,  $J$  = 3.3 Hz), 129.0, 129.0, 128.5, 128.1 (d,  $J$  = 6.4 Hz), 126.7 (d,  $J$  = 6.4 Hz), 125.9, 122.4, 93.0 (d,  $J$  = 188.4 Hz), 91.7, 87.3.

$^{19}\text{F}$  NMR (470 MHz,  $\text{CDCl}_3$ , 25  $^\circ\text{C}$ ,  $\delta$ ): –181.8 (d,  $J$  = 48.0 Hz).

HRMS-FIA( $m/z$ ) calc'd for  $\text{C}_{22}\text{H}_{14}\text{ClFNaO}$  [ $\text{M}+\text{Na}$ ] $^+$ : 371.0609; found: 371.0594.

#### (4-Pyrazolyl)phenyl-fluoroacetophenone (2f)

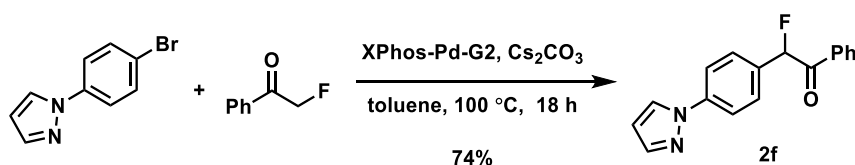

1-(4-Bromophenyl)-1H-pyrazole (223 mg, 1.00 mmol, 1.00 equiv.), XPhos-Pd-G2 (23.6 mg, 30.0  $\mu$ mol, 3.00 mol%) and  $\text{Cs}_2\text{CO}_3$  (489 mg, 1.50 mmol, 1.50 equiv.) were added to a flame-dried Schlenk tube. The Schlenk tube was evacuated and back-filled with nitrogen (3  $\times$ ). Toluene (5 mL) and 2-fluoroacetophenone (145  $\mu$ L, 1.20 mmol, 1.20 equiv.) were added to the mixture. The Schlenk tube was immersed into a pre-heated oil bath at 100  $^\circ\text{C}$ . After 18 h, the oil bath was removed, and the Schlenk tube was allowed to cool to room temperature. The reaction mixture was filtered through Celite and eluted with EtOAc (3  $\times$  4 mL). The filtrate was evaporated under reduced pressure. Purification by flash silica gel column chromatography (hexanes/EtOAc = 6:1 v/v) afforded 208 mg of the title compound as a yellow solid (74% yield).

$R_f$  = 0.63 (hexanes/EtOAc = 2:1 v/v).

#### NMR Spectroscopy:

$^1\text{H}$  NMR (500 MHz,  $\text{CDCl}_3$ , 25  $^\circ\text{C}$ ,  $\delta$ ): 7.99–7.91 (m, 3H), 7.75 (t,  $J$  = 8.1 Hz, 3H), 7.62–7.53 (m, 3H),

7.45 (t,  $J = 7.7$  Hz, 2H), 6.57 (d,  $J = 48.5$  Hz, 1H), 6.48 (s, 1H).

$^{13}\text{C}$  NMR (125 MHz,  $\text{CDCl}_3$ , 25 °C,  $\delta$ ): 194.2 (d,  $J = 21.6$  Hz), 141.7, 141.1, 134.1, 132.3 (d,  $J = 20.0$  Hz), 129.20 (d,  $J = 2.8$  Hz), 128.9, 128.8 (d,  $J = 5.3$  Hz), 126.9, 119.7, 108.2, 93.5 (d,  $J = 185.9$  Hz).

$^{19}\text{F}$  NMR (470 MHz,  $\text{CDCl}_3$ , 24 °C,  $\delta$ ):  $-178.5$  (d,  $J = 47.9$  Hz).

HRMS-FIA( $m/z$ ) calc'd for  $\text{C}_{17}\text{H}_{14}\text{FN}_2\text{O}$  [ $\text{M}+\text{H}$ ] $^+$ : 281.1085; found: 281.1091.

### (3-Morpholino)phenyl-fluoroacetophenone (2g)

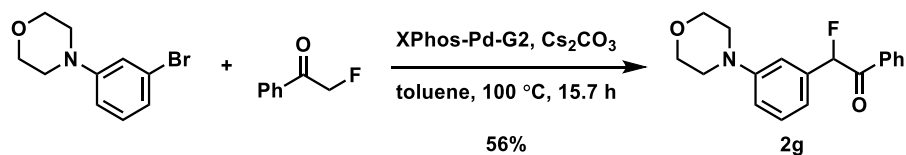

XPhos-Pd-G2 (23.6 mg, 30.0  $\mu\text{mol}$ , 3.00 mol%) and  $\text{Cs}_2\text{CO}_3$  (489 mg, 1.50 mmol, 1.50 equiv.) were added to a flame-dried Schlenk tube. The Schlenk tube was evacuated and back-filled with nitrogen (3  $\times$ ). A solution of 4-(3-bromophenyl)morpholine (242 mg, 1.00 mmol, 1.00 equiv.) in toluene (5 mL) and 2-fluoroacetophenone (145  $\mu\text{L}$ , 1.20 mmol, 1.20 equiv.) were added to the mixture. The Schlenk tube was immersed into a pre-heated oil bath at 100 °C. After 15.7 h, the oil bath was removed, and the Schlenk tube was allowed to cool to room temperature. The reaction mixture was filtered through Celite and eluted with EtOAc (3  $\times$  4 mL). The filtrate was evaporated under reduced pressure. Purification by flash silica gel column chromatography (hexanes/EtOAc = 4:1 v/v) afforded 166 mg of the title compound as an orange solid (56% yield).

$R_f = 0.22$  (hexanes/EtOAc = 4:1 v/v).

### NMR Spectroscopy:

$^1\text{H}$  NMR (500 MHz,  $\text{CDCl}_3$ , 25 °C,  $\delta$ ): 7.94 (d,  $J = 8.0$  Hz, 2H), 7.54 (t,  $J = 7.5$  Hz, 1H), 7.42 (t,  $J = 7.5$  Hz, 2H), 7.29 (t,  $J = 7.5$  Hz, 1H), 6.99 (s, 1H), 6.98 (d,  $J = 7.5$  Hz, 1H), 6.90 (d,  $J = 8.0$  Hz, 1H), 6.46 (d,  $J = 48.5$  Hz, 1H), 3.83 (t,  $J = 5.0$  Hz, 4H), 3.15 (t,  $J = 5.0$  Hz, 4H).

$^{13}\text{C}$  NMR (125 MHz,  $\text{CDCl}_3$ , 25 °C,  $\delta$ ): 194.4 (d,  $J = 21.5$  Hz), 151.9, 135.3 (d,  $J = 20.5$  Hz), 134.2, 133.8, 130.0, 129.2 (d,  $J = 2.1$  Hz), 128.8, 118.8 (d,  $J = 5.3$  Hz), 116.6 (d,  $J = 3.2$  Hz), 114.0 (d,  $J = 6.4$  Hz), 94.1 (d,  $J = 185.2$  Hz), 66.9, 49.0.

$^{19}\text{F}$  NMR (470 MHz,  $\text{CDCl}_3$ , 23 °C,  $\delta$ ):  $-178.9$  (d,  $J = 50.4$  Hz).

HRMS-FIA( $m/z$ ) calc'd for  $\text{C}_{18}\text{H}_{18}\text{FNNaO}_2$  [ $\text{M}+\text{Na}$ ] $^+$ : 322.1214; found: 322.1199.



**(3-Nitro)phenyl-fluoroacetophenone (2h)**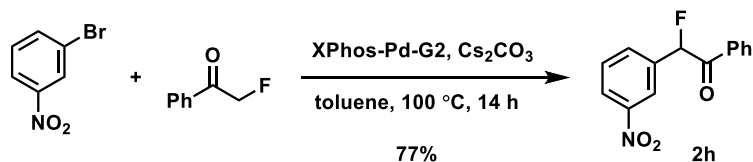

1-Bromo-3-nitrobenzene (404 mg, 2.00 mmol, 1.00 equiv.), XPhos-Pd-G2 (47.3 mg, 60.0  $\mu\text{mol}$ , 3.00 mol%) and  $\text{Cs}_2\text{CO}_3$  (978 mg, 3.00 mmol, 1.50 equiv.) were added to a flame-dried Schlenk tube. The Schlenk tube was evacuated and back-filled with nitrogen (3  $\times$ ). Toluene (10 mL) and 2-fluoroacetophenone (291  $\mu\text{L}$ , 2.40 mmol, 1.20 equiv.) were added to the mixture. The Schlenk tube was immersed into a pre-heated oil bath at 100  $^\circ\text{C}$ . After 14 h, the oil bath was removed, and the Schlenk tube was allowed to cool to room temperature. The reaction mixture was filtered through Celite and eluted with EtOAc (3  $\times$  8 mL). The filtrate was evaporated under reduced pressure. Purification by flash silica gel column chromatography (hexanes/EtOAc = 6:1 v/v) afforded 400 mg of the title compound as an orange solid (77% yield).

$R_f$  = 0.28 (hexanes/EtOAc = 4:1 v/v).

**NMR Spectroscopy:**

$^1\text{H NMR}$  (500 MHz,  $\text{CDCl}_3$ , 23  $^\circ\text{C}$ ,  $\delta$ ): 8.39 (s, 1H), 8.25 (dd,  $J$  = 8.2, 2.3 Hz, 1H), 7.98 (d,  $J$  = 7.9 Hz, 2H), 7.82 (d,  $J$  = 7.6 Hz, 1H), 7.67–7.56 (m, 2H), 7.48 (t,  $J$  = 7.8 Hz, 2H), 6.57 (d,  $J$  = 48.0 Hz, 1H).

$^{13}\text{C NMR}$  (125 MHz,  $\text{CDCl}_3$ , 25  $^\circ\text{C}$ ,  $\delta$ ): 193.5 (d,  $J$  = 21.4 Hz), 148.5, 136.4 (d,  $J$  = 20.9 Hz), 134.4, 133.7, 132.8 (d,  $J$  = 5.9 Hz), 130.2, 129.3 (d,  $J$  = 3.6 Hz), 129.0, 124.4, 122.0 (d,  $J$  = 7.2 Hz), 92.7 (d,  $J$  = 188.5 Hz).

$^{19}\text{F NMR}$  (470 MHz,  $\text{CDCl}_3$ , 23  $^\circ\text{C}$ ,  $\delta$ ): -178.9 (d,  $J$  = 50.4 Hz).

**HRMS-FIA(m/z)** calc'd for  $\text{C}_{14}\text{H}_{10}\text{FNaNO}_3$   $[\text{M}+\text{Na}]^+$ : 282.0537; found: 282.0540

**Fluoren-9-onyl-fluoroacetophenone (2i)**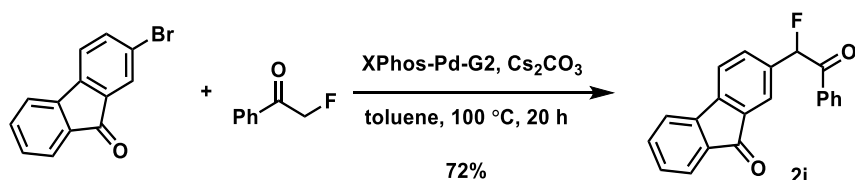

2-Bromo-9-fluorenone (518 mg, 2.00 mmol, 1.00 equiv.), XPhos-Pd-G2 (47.3 mg, 60.0  $\mu\text{mol}$ , 3.00 mol%) and  $\text{Cs}_2\text{CO}_3$  (977 mg, 3.00 mmol, 1.50 equiv.) were added to a flame-dried Schlenk tube. The Schlenk tube was evacuated and back-filled with nitrogen (3  $\times$ ). Toluene (10 mL) and 2-fluoroacetophenone (291  $\mu\text{L}$ , 2.40 mmol, 1.20 equiv.) were added to the mixture. The Schlenk tube was immersed into a pre-heated oil bath at 100  $^\circ\text{C}$ . After 20 h, the oil bath was removed, and the Schlenk tube was allowed to cool to room temperature. The reaction mixture was filtered through Celite and eluted with EtOAc (3  $\times$  8 mL). The filtrate was

evaporated under reduced pressure. Purification by flash silica gel column chromatography (hexanes/EtOAc = 8:1 v/v) afforded 456 mg of the title compound as a yellow solid (72% yield).

$R_f$  = 0.21 (hexanes/EtOAc = 6:1 v/v).

#### NMR Spectroscopy:

$^1\text{H NMR}$  (500 MHz,  $\text{CDCl}_3$ , 25 °C,  $\delta$ ): 7.96 (d,  $J$  = 7.5 Hz, 2H), 7.79 (s, 1H), 7.66 (d,  $J$  = 7.5 Hz, 1H), 7.61 (d,  $J$  = 8.0 Hz, 1H), 7.58–7.40 (m, 6H), 7.32 (t,  $J$  = 7.1 Hz, 1H), 6.52 (d,  $J$  = 48.0 Hz, 1H).

$^{13}\text{C NMR}$  (125 MHz,  $\text{CDCl}_3$ , 25 °C,  $\delta$ ): 193.8 (d,  $J$  = 21.5 Hz), 192.9, 145.6 (d,  $J$  = 2.1 Hz), 143.6, 135.4 (d,  $J$  = 20.1 Hz), 135.0, 134.9, 134.3, 134.1, 133.8, 133.6 (d,  $J$  = 6.6 Hz), 129.7, 129.1 (d,  $J$  = 2.1 Hz), 128.9, 124.6, 123.2 (d,  $J$  = 5.4 Hz), 121.0, 120.8, 93.3 (d,  $J$  = 187.2 Hz).

$^{19}\text{F NMR}$  (470 MHz,  $\text{CDCl}_3$ , 25 °C,  $\delta$ ): –180.0 (d,  $J$  = 48.0 Hz).

HRMS-FIA( $m/z$ ) calc'd for  $\text{C}_{22}\text{H}_{14}\text{FO}_2$  [ $\text{M}+\text{H}$ ] $^+$ : 317.0972; found: 317.0975.

#### (4-Ethyl-carboxyl)phenyl-fluoroacetophenone (2j)

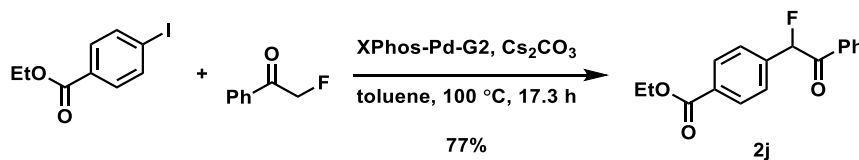

XPhos-Pd-G2 (23.6 mg, 30.0  $\mu\text{mol}$ , 3.00 mol%) and  $\text{Cs}_2\text{CO}_3$  (489 mg, 1.50 mmol, 1.50 equiv.) were added to a flame-dried Schlenk tube. The Schlenk tube was evacuated and back-filled with nitrogen (3  $\times$ ). Toluene (5 mL), ethyl 4-iodobenzoate (276 mg, 1.00 mmol, 1.00 equiv.) and 2-fluoroacetophenone (145  $\mu\text{L}$ , 1.20 mmol, 1.20 equiv.) were added to the mixture. The Schlenk tube was immersed into a pre-heated oil bath at 100 °C. After 17.3 h, the oil bath was removed, and the Schlenk tube was allowed to cool to room temperature. The reaction mixture was filtered through Celite and eluted with EtOAc (3  $\times$  4 mL). The filtrate was evaporated under reduced pressure. Purification by flash silica gel column chromatography (hexanes/EtOAc = 5:1 v/v) afforded 221 mg of the title compound as a white solid (77% yield).

$R_f$  = 0.40 (hexanes/EtOAc = 2:1 v/v).

#### NMR Spectroscopy:

$^1\text{H NMR}$  (500 MHz,  $\text{CDCl}_3$ , 23 °C,  $\delta$ ): 8.06 (d,  $J$  = 8.6 Hz, 2H), 7.93 (d,  $J$  = 7.2 Hz, 2H), 7.63–7.50 (m, 3H), 7.42 (t,  $J$  = 7.5 Hz, 2H), 6.53 (d,  $J$  = 48.4 Hz, 1H), 4.36 (q,  $J$  = 7.1 Hz, 2H), 1.36 (t,  $J$  = 7.1 Hz, 3H).

$^{13}\text{C NMR}$  (125 MHz,  $\text{CDCl}_3$ , 25 °C,  $\delta$ ): 194.0 (d,  $J$  = 21.1 Hz), 166.0, 138.9 (d,  $J$  = 19.6 Hz), 134.1, 133.9, 131.6 (d,  $J$  = 2.1 Hz), 130.3, 129.3 (d,  $J$  = 3.1 Hz), 128.9, 126.9 (d,  $J$  = 6.1 Hz), 93.8 (d,  $J$  = 187.6 Hz), 61.3, 14.4.

$^{19}\text{F NMR}$  (470 MHz,  $\text{CDCl}_3$ , 23 °C,  $\delta$ ): –182.6 (d,  $J$  = 48.9 Hz).

**HRMS-FIA(m/z)** calc'd for  $C_{17}H_{16}FO_3$   $[M+H]^+$ : 287.1078; found: 287.1087.

**(3-Dioxolanyl)phenyl-fluoroacetophenone (S1)**

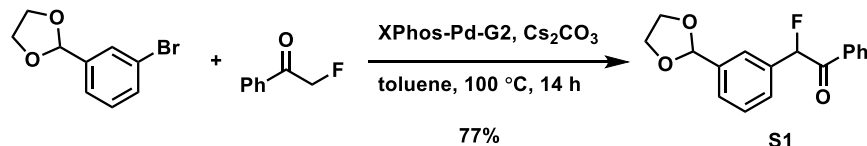

XPhos-Pd-G2 (23.6 mg, 30.0  $\mu$ mol, 3.00 mol%) and  $Cs_2CO_3$  (489 mg, 1.50 mmol, 1.50 equiv.) were added to a flame-dried Schlenk tube. The Schlenk tube was evacuated and back-filled with nitrogen (3  $\times$ ). Toluene (5 mL), 2-(3-bromophenyl)-1,3-dioxolane (152 mL, 1.00 mmol, 1.00 equiv.) and 2-fluoroacetophenone (145  $\mu$ L, 1.20 mmol, 1.20 equiv.) were added to the mixture. The Schlenk tube was immersed into a pre-heated oil bath at 100  $^{\circ}C$ . After 14 h, the oil bath was removed, and the Schlenk tube was allowed to cool to room temperature. The reaction mixture was filtered through Celite and eluted with EtOAc (3  $\times$  4 mL). The filtrate was evaporated under reduced pressure. Purification by flash silica gel column chromatography (hexanes/EtOAc = 6:1 v/v) afforded 220 mg of the title compound as a yellow liquid (77% yield).

$R_f$  = 0.25 (hexanes/EtOAc = 4:1 v/v).

**NMR Spectroscopy:**

$^1H$  NMR (500 MHz,  $CDCl_3$ , 25  $^{\circ}C$ ,  $\delta$ ): 7.93 (d,  $J$  = 8.0 Hz, 2H), 7.63 (s, 1H), 7.58–7.46 (m, 3H), 7.46–7.38 (m, 3H), 6.52 (d,  $J$  = 48.5 Hz, 1H), 5.80 (s, 1H), 4.20–3.92 (m, 4H).

$^{13}C$  NMR (125 MHz,  $CDCl_3$ , 23  $^{\circ}C$ ,  $\delta$ ): 194.2 (d,  $J$  = 21.5 Hz), 139.2, 134.5 (d,  $J$  = 20.2 Hz), 134.0, 133.9, 129.3, 129.2 (d,  $J$  = 2.9 Hz), 128.8, 128.1 (d,  $J$  = 5.5 Hz), 127.9 (d,  $J$  = 2.5 Hz), 125.6 (d,  $J$  = 5.8 Hz), 103.2 (d,  $J$  = 4.6 Hz), 93.9 (d,  $J$  = 187.3 Hz), 65.4.

$^{19}F$  NMR (470 MHz,  $CDCl_3$ , 25  $^{\circ}C$ ,  $\delta$ ): -179.3 (d,  $J$  = 48.9 Hz).

**HRMS-FIA(m/z)** calc'd for  $C_{17}H_{16}FO_3$   $[M+H]^+$ : 287.1078; found: 287.1091.

**(3-Formyl)phenyl-fluoroacetophenone (2k)**

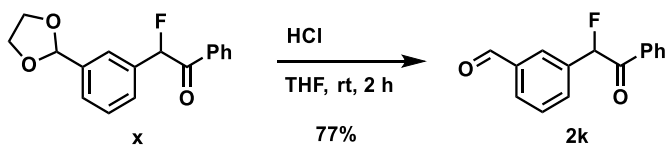

(3-Dioxolanyl)phenyl-fluoroacetophenone, x, (100 mg, 0.350 mmol) was dissolved in THF (5 mL). HCl aqueous solution (2 N, 1.2 mL) was added. The reaction mixture was stirred at room temperature for 2 h. EtOAc (30 mL) was added. The mixture was washed with NaOH aqueous solution (1 N, 5 mL) and brine (5 mL). The organic layer was dried over  $Na_2SO_4$ , filtered and evaporated. Purification by flash silica gel column chromatography (hexanes/EtOAc = 4:1 v/v) afforded 65.0 mg of the title compound as a white solid

(77% yield).

$R_f$  = 0.61 (hexanes/EtOAc = 2:1 v/v).

#### NMR Spectroscopy:

**$^1\text{H}$  NMR** (500 MHz,  $\text{CDCl}_3$ , 25 °C,  $\delta$ ): 10.01 (d,  $J$  = 0.8 Hz, 1H), 8.02 (s, 1H), 7.96 (d,  $J$  = 7.7 Hz, 2H), 7.89 (d,  $J$  = 7.7 Hz, 1H), 7.75 (d,  $J$  = 7.9 Hz, 1H), 7.63–7.52 (m, 2H), 7.45 (t,  $J$  = 7.7 Hz, 2H), 6.58 (d,  $J$  = 48.2 Hz, 1H).

**$^{13}\text{C}$  NMR** (125 MHz,  $\text{CDCl}_3$ , 23 °C,  $\delta$ ):  $\delta$  194.0 (d,  $J$  = 21.4 Hz), 191.6 (d,  $J$  = 7.0 Hz), 137.1, 135.7 (d,  $J$  = 20.6 Hz), 134.3, 133.9, 132.8 (d,  $J$  = 5.6 Hz), 130.8 (d,  $J$  = 2.1 Hz), 130.0, 129.3 (d,  $J$  = 3.4 Hz), 129.0, 128.24 (d,  $J$  = 6.3 Hz), 93.4 (dd,  $J$  = 187.3, 2.7 Hz).

**$^{19}\text{F}$  NMR** (470 MHz,  $\text{CDCl}_3$ , 25 °C,  $\delta$ ): –181.3 (d,  $J$  = 48.4 Hz).

**HRMS-FIA(m/z)** calc'd for  $\text{C}_{15}\text{H}_{12}\text{FO}_2$   $[\text{M}+\text{H}]^+$ : 243.0816; found: 243.0807.

#### (2-Chlorophenyl-methanonyl)phenyl-fluoroacetophenone (2I)

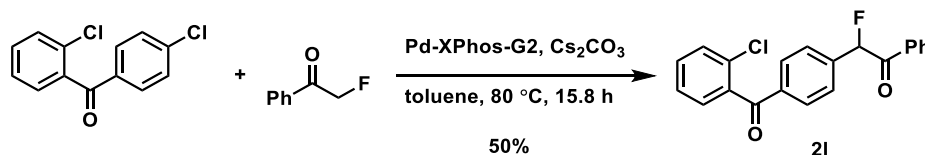

2-Chlorophenyl-4-chlorophenyl-methanone (243 mg, 1.00 mmol, 1.00 equiv.), XPhos-Pd-G2 (23.6 mg, 30.0  $\mu\text{mol}$ , 3.00 mol%) and  $\text{Cs}_2\text{CO}_3$  (489 mg, 1.50 mmol, 1.50 equiv.) were added to a flame-dried Schlenk tube. The Schlenk tube was evacuated and back-filled with nitrogen (3  $\times$ ). Toluene (5 mL) and 2-fluoroacetophenone (145  $\mu\text{L}$ , 1.20 mmol, 1.20 equiv.) were added to the mixture. The Schlenk tube was immersed into a pre-heated oil bath at 80 °C. After 15.8 h, the oil bath was removed, and the Schlenk tube was allowed to cool to room temperature. The reaction mixture was filtered through Celite and eluted with EtOAc (3  $\times$  4 mL). The filtrate was evaporated under reduced pressure. Purification by flash silica gel column chromatography (hexanes/EtOAc = 5:1 v/v) afforded 176 mg of the title compound as an orange oil (50% yield).

$R_f$  = 0.33 (hexanes/EtOAc = 4:1 v/v).

#### NMR Spectroscopy:

**$^1\text{H}$  NMR** (500 MHz,  $\text{CDCl}_3$ , 25 °C,  $\delta$ ): 7.97 (d,  $J$  = 8.1 Hz, 2H), 7.85 (d,  $J$  = 8.1 Hz, 2H), 7.64–7.56 (m, 3H), 7.50–7.42 (m, 4H), 7.40–7.34 (m, 2H), 6.56 (d,  $J$  = 48.4 Hz, 1H).

**$^{13}\text{C}$  NMR** (125 MHz,  $\text{CDCl}_3$ , 25 °C,  $\delta$ ): 194.6, 193.9 (d,  $J$  = 21.4 Hz), 139.7 (d,  $J$  = 19.8 Hz), 138.2, 137.3 (d,  $J$  = 2.0 Hz), 134.2, 133.9, 131.5, 131.5, 130.7, 130.3, 129.3 (d,  $J$  = 3.5 Hz), 129.3, 128.9, 127.0 (d,  $J$  = 6.3 Hz), 126.9, 93.8 (d,  $J$  = 188.2 Hz).

**$^{19}\text{F}$  NMR** (470 MHz,  $\text{CDCl}_3$ , 23 °C,  $\delta$ ): –183.3 (d,  $J$  = 47.9 Hz).

**HRMS-FIA(m/z)** calc'd for  $C_{21}H_{15}ClFO_2$   $[M+H]^+$ : 353.0739; found: 353.0730.

### Quinoline-6-fluoroacetophenone (2m)

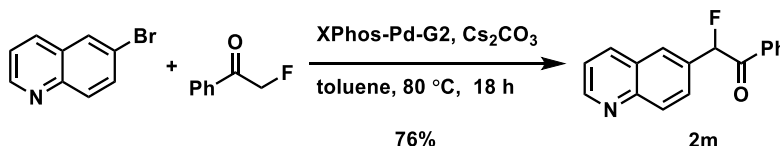

XPhos-Pd-G2 (23.6 mg, 30.0  $\mu$ mol, 3.00 mol%) and  $Cs_2CO_3$  (489 mg, 1.50 mmol, 1.50 equiv.) were added to a flame-dried Schlenk tube. The Schlenk tube was evacuated and back-filled with nitrogen (3  $\times$ ). A solution of 6-bromoquinoline (135  $\mu$ L, 1.00 mmol, 1.00 equiv.) in toluene (5 mL) and 2-fluoroacetophenone (145  $\mu$ L, 1.20 mmol, 1.20 equiv.) were added to the mixture. The Schlenk tube was immersed into a pre-heated oil bath at 80  $^\circ C$ . After 13.7 h, the oil bath was removed, and the Schlenk tube was allowed to cool to room temperature. The reaction mixture was filtered through Celite and eluted with EtOAc (3  $\times$  4 mL). The filtrate was evaporated under reduced pressure. Purification by flash silica gel column chromatography (hexanes/EtOAc = 3:1 v/v) afforded 201 mg of the title compound as a white solid (76% yield).

**R<sub>f</sub>** = 0.10 (hexanes/EtOAc = 4:1 v/v).

### NMR Spectroscopy:

**$^1H$  NMR** (500 MHz,  $CDCl_3$ , 24  $^\circ C$ ,  $\delta$ ): 8.94 (d,  $J$  = 4.2 Hz, 1H), 8.16 (t,  $J$  = 9.4 Hz, 2H), 8.01–7.94 (m, 3H), 7.82 (d,  $J$  = 8.7 Hz, 1H), 7.55 (t,  $J$  = 7.4 Hz, 1H), 7.46–7.39 (m, 3H), 6.69 (d,  $J$  = 48.5 Hz, 1H).

**$^{13}C$  NMR** (125 MHz,  $CDCl_3$ , 25  $^\circ C$ ,  $\delta$ ): 194.2 (d,  $J$  = 21.4 Hz), 151.6, 148.5 (d,  $J$  = 2.0 Hz), 136.5, 134.1, 134.1, 132.7 (d,  $J$  = 19.9 Hz), 130.8, 129.3 (d,  $J$  = 3.1 Hz), 128.9, 128.2, 127.8 (d,  $J$  = 4.9 Hz), 127.0 (d,  $J$  = 6.9 Hz), 121.9, 93.9 (d,  $J$  = 187.1 Hz).

**$^{19}F$  NMR** (470 MHz,  $CDCl_3$ , 24  $^\circ C$ ,  $\delta$ ): -179.8 (d,  $J$  = 47.9 Hz).

**HRMS-FIA(m/z)** calc'd for  $C_{17}H_{13}FNO$   $[M+H]^+$ : 266.0976; found: 266.0966.

### (2-Methylbenzo[*d*]thiazol-5-yl)-fluoroacetophenone (2n)

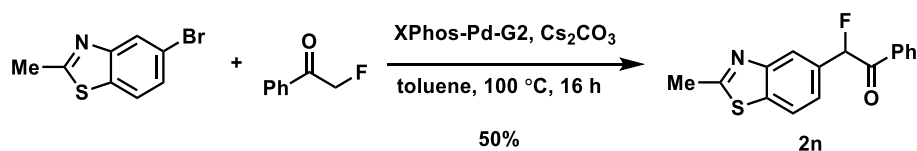

5-Bromo-2-methylbenzothiazole (228 mg, 1.00 mmol, 1.00 equiv.), XPhos-Pd-G2 (23.6 mg, 30.0  $\mu$ mol, 3.00 mol%) and  $Cs_2CO_3$  (489 mg, 1.50 mmol, 1.50 equiv.) were added to a flame-dried Schlenk tube. The Schlenk tube was evacuated and back-filled with nitrogen (3  $\times$ ). Toluene (5 mL) and 2-fluoroacetophenone (145  $\mu$ L, 1.28 mmol, 1.20 equiv.) were added to the mixture. The Schlenk tube was immersed into a pre-heated oil bath at 100  $^\circ C$ . After 16 h, the oil bath was removed, and the Schlenk tube was allowed to cool to

room temperature. The reaction mixture was filtered through Celite and eluted with EtOAc (3 × 4 mL). The filtrate was evaporated under reduced pressure. Purification by flash silica gel column chromatography (hexanes/EtOAc = 3:1 v/v) afforded 142 mg of the title compound as a yellow-white solid (50% yield).

$R_f$  = 0.35 (hexanes/EtOAc = 2:1 v/v).

#### NMR Spectroscopy:

$^1\text{H NMR}$  (500 MHz,  $\text{CDCl}_3$ , 25 °C,  $\delta$ ): 8.10 (s, 1H), 7.98 (d,  $J$  = 7.0 Hz, 2H), 7.85 (d,  $J$  = 8.0 Hz, 1H), 7.54 (t,  $J$  = 8.0 Hz, 1H), 7.48 (d,  $J$  = 8.0 Hz, 1H), 7.42 (t,  $J$  = 8.0 Hz, 2H), 6.66 (d,  $J$  = 49.0 Hz, 1H), 2.84 (s, 3H).

$^{13}\text{C NMR}$  (125 MHz,  $\text{CDCl}_3$ , 25 °C,  $\delta$ ): 193.0 (d, 21.5 Hz), 168.5, 153.7, 137.1, 134.0, 133.9, 132.4 (d,  $J$  = 20.4 Hz), 129.2 (d,  $J$  = 2.3 Hz), 128.8, 123.5 (d,  $J$  = 5.4 Hz), 122.3, 121.7 (d,  $J$  = 5.3 Hz), 93.8 (d,  $J$  = 187.4 Hz), 20.3.

$^{19}\text{F NMR}$  (470 MHz,  $\text{CDCl}_3$ , 25 °C,  $\delta$ ): -177.7 (d,  $J$  = 49.4 Hz).

HRMS-FIA( $m/z$ ) calc'd for  $\text{C}_{16}\text{H}_{13}\text{FNOS}$  [ $\text{M}+\text{H}$ ] $^+$ : 286.0696; found: 286.0687.

#### Pyridine-3-fluoroacetophenone (2o)

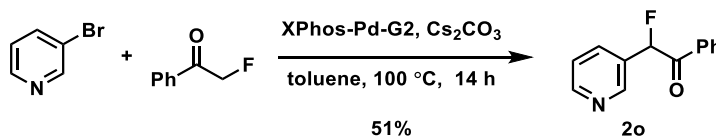

XPhos-Pd-G2 (47.3 mg, 60.0  $\mu\text{mol}$ , 3.00 mol%) and  $\text{Cs}_2\text{CO}_3$  (978 mg, 3.00 mmol, 1.50 equiv.) were added to a flame-dried Schlenk tube. The Schlenk tube was evacuated and back-filled with nitrogen (3 ×). Toluene (10 mL), 3-bromo-pyridine (193  $\mu\text{L}$ , 2.00 mmol, 1.00 equiv.) and 2-fluoroacetophenone (291  $\mu\text{L}$ , 2.40 mmol, 1.20 equiv.) were added to the mixture. The Schlenk tube was immersed into a pre-heated oil bath at 100 °C. After 14 h, the oil bath was removed, and the Schlenk tube was allowed to cool to room temperature. The reaction mixture was filtered through Celite and eluted with EtOAc (3 × 8 mL). The filtrate was evaporated under reduced pressure. Purification by flash silica gel column chromatography (hexanes/EtOAc = 4:1 v/v to 3:2 v/v) afforded 220 mg of the title compound as a yellow liquid (51% yield).

$R_f$  = 0.25 (hexanes/EtOAc = 2:1 v/v).

#### NMR Spectroscopy:

$^1\text{H NMR}$  (500 MHz,  $\text{CDCl}_3$ , 25 °C,  $\delta$ ): 8.77 (s, 1H), 8.63 (d,  $J$  = 4.8 Hz, 1H), 7.95 (s, 1H), 7.79 (dd,  $J$  = 8.0, 1.8 Hz, 1H), 7.58 (t,  $J$  = 7.5 Hz, 1H), 7.45 (t,  $J$  = 15.7 Hz, 1H), 7.34 (dd,  $J$  = 8.0, 4.8 Hz, 1H), 6.57 (d,  $J$  = 48.0 Hz, 1H).

$^{13}\text{C NMR}$  (125 MHz,  $\text{CDCl}_3$ , 23 °C,  $\delta$ ): 193.6 (d,  $J$  = 21.5 Hz), 150.8, 148.7, 135.0 (d,  $J$  = 5.0 Hz), 134.5, 133.8, 130.5 (d,  $J$  = 20.7 Hz), 129.2 (d,  $J$  = 3.2 Hz), 129.0, 124.0, 91.8 (dd,  $J$  = 187.2, 2.3 Hz).

$^{19}\text{F}$  NMR (470 MHz,  $\text{CDCl}_3$ , 25 °C,  $\delta$ ): -182.1 (d,  $J$  = 48.9 Hz).

HRMS-FIA( $m/z$ ) calc'd for  $\text{C}_{13}\text{H}_{11}\text{FNO}$  [ $\text{M}+\text{H}$ ] $^+$ : 216.0819; found: 216.0824.

### Quinoline-3-fluoroacetophenone (2p)

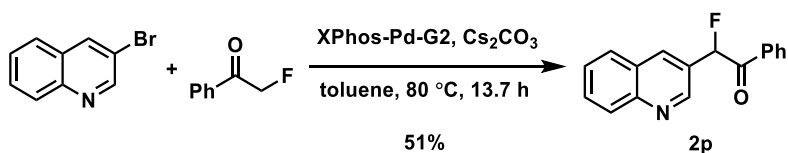

XPhos-Pd-G2 (23.6 mg, 30.0  $\mu\text{mol}$ , 2.80 mol%) and  $\text{Cs}_2\text{CO}_3$  (489 mg, 1.50 mmol, 1.40 equiv.) were added to a flame-dried Schlenk tube. The Schlenk tube was evacuated and back-filled with nitrogen (3  $\times$ ). A solution of 3-bromoquinoline (157  $\mu\text{L}$ , 1.07 mmol, 1.00 equiv.) in toluene (5 mL) and 2-fluoroacetophenone (223 mg, 1.28 mmol, 1.20 equiv.) were added to the mixture. The Schlenk tube was immersed into a pre-heated oil bath at 80 °C. After 13.7 h, the oil bath was removed, and the Schlenk tube was allowed to cool to room temperature. The reaction mixture was filtered through Celite and eluted with EtOAc (3  $\times$  4 mL). The filtrate was evaporated under reduced pressure. Purification by flash silica gel column chromatography (hexanes/EtOAc = 4:1 v/v) afforded 136 mg of the title compound as a yellow-white solid (51% yield).

$R_f$  = 0.17 (hexanes/EtOAc = 4:1 v/v).

### NMR Spectroscopy:

$^1\text{H}$  NMR (500 MHz,  $\text{CDCl}_3$ , 22 °C,  $\delta$ ): 9.05 (s, 1H), 8.26 (s, 1H), 8.11 (d,  $J$  = 9.0 Hz, 1H), 7.98 (d,  $J$  = 7.5 Hz, 2H), 7.82 (d,  $J$  = 8.0 Hz, 1H), 7.75 (t,  $J$  = 8.5 Hz, 1H), 7.59–7.55 (m, 2H), 7.44 (t,  $J$  = 7.5 Hz, 2H), 6.76 (d,  $J$  = 48.0 Hz, 1H).

$^{13}\text{C}$  NMR (125 MHz,  $\text{CDCl}_3$ , 25 °C,  $\delta$ ): 193.6 (d,  $J$  = 21.4 Hz), 149.0 (d,  $J$  = 4.3 Hz), 148.5, 135.1 (d,  $J$  = 6.4 Hz), 134.3, 133.8, 130.8, 129.5, 129.2, 129.0, 128.3, 127.6, 127.5, 127.3 (d,  $J$  = 20.5 Hz), 92.1 (d,  $J$  = 187.4 Hz).

$^{19}\text{F}$  NMR (470 MHz,  $\text{CDCl}_3$ , 25 °C,  $\delta$ ): -180.4 (d,  $J$  = 48.5 Hz).

HRMS-FIA( $m/z$ ) calc'd for  $\text{C}_{17}\text{H}_{13}\text{FNO}$  [ $\text{M}+\text{H}$ ] $^+$ : 266.0976; found: 266.0988.

### (Morpholinomethyl)phenyl-fluoroacetophenone (2q)

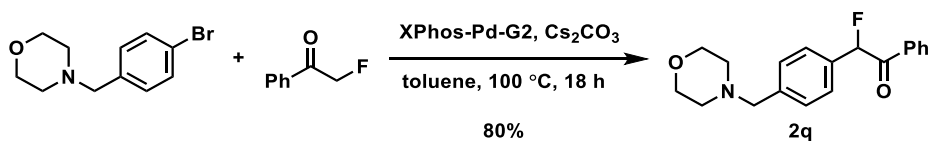

XPhos-Pd-G2 (23.6 mg, 30.0  $\mu\text{mol}$ , 3.00 mol%) and  $\text{Cs}_2\text{CO}_3$  (489 mg, 1.50 mmol, 1.50 equiv.) were added to a flame-dried Schlenk tube. The Schlenk tube was evacuated and back-filled with nitrogen (3  $\times$ ). A solution of 4-(4-bromobenzyl)morpholine (256 mg, 1.00 mmol, 1.00 equiv.) in toluene (5 mL) and 2-

fluoroacetophenone (145  $\mu$ L, 1.20 mmol, 1.20 equiv.) were added to the mixture. The Schlenk tube was immersed into a pre-heated oil bath at 100  $^{\circ}$ C. After 18 h, the oil bath was removed, and the Schlenk tube was allowed to cool to room temperature. The reaction mixture was filtered through Celite and eluted with EtOAc (3  $\times$  4 mL). The filtrate was evaporated under reduced pressure. Purification by flash silica gel column chromatography (hexanes/EtOAc = 2:1 v/v with 1% Et<sub>3</sub>N) afforded 250 mg of the title compound as a colorless liquid (80% yield).

$R_f$  = 0.40 (hexanes/EtOAc = 1:1 v/v with 1% Et<sub>3</sub>N).

#### NMR Spectroscopy:

<sup>1</sup>H NMR (500 MHz, CDCl<sub>3</sub>, 25  $^{\circ}$ C,  $\delta$ ): 7.94 (d,  $J$  = 7.5 Hz, 2H), 7.55 (t,  $J$  = 7.5 Hz, 1H), 7.45–7.41 (m, 4H), 7.36 (d,  $J$  = 7.9 Hz, 2H), 6.50 (d,  $J$  = 48.6 Hz, 1H), 3.68 (t,  $J$  = 4.6 Hz, 4H), 3.47 (s, 2H), 2.41 (t,  $J$  = 4.5 Hz, 4H).

<sup>13</sup>C NMR (125 MHz, CDCl<sub>3</sub>, 25  $^{\circ}$ C,  $\delta$ ): 194.3 (d,  $J$  = 21.4 Hz), 139.8, 134.2, 133.9, 133.2 (d,  $J$  = 20.4 Hz), 129.9, 129.2 (d,  $J$  = 3.0 Hz), 128.8, 127.5 (d,  $J$  = 6.0 Hz), 93.9 (d,  $J$  = 181.7 Hz), 67.1, 63.0, 53.7.

<sup>19</sup>F NMR (470 MHz, CDCl<sub>3</sub>, 24  $^{\circ}$ C,  $\delta$ ): –178.0 (d,  $J$  = 48.0 Hz).

HRMS-FIA( $m/z$ ) calc'd for C<sub>19</sub>H<sub>21</sub>FNO<sub>2</sub> [M+H]<sup>+</sup>: 314.1551; found: 314.1549.

#### Mesitylynyl-fluoroacetophenone (2s)

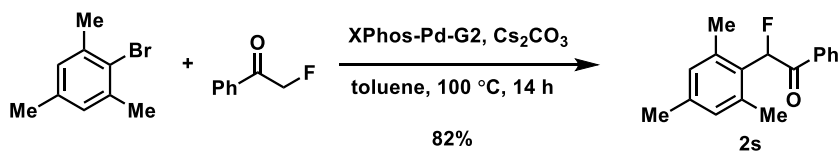

XPhos-Pd-G2 (23.6 mg, 30.0  $\mu$ mol, 3.00 mol%) and Cs<sub>2</sub>CO<sub>3</sub> (489 mg, 1.50 mmol, 1.50 equiv.) were added to a flame-dried Schlenk tube. The Schlenk tube was evacuated and back-filled with nitrogen (3  $\times$ ). Toluene (5 mL), 2-Bromomesitylene (153 mL, 1.00 mmol, 1.00 equiv.) and 2-fluoroacetophenone (145  $\mu$ L, 1.20 mmol, 1.20 equiv.) were added to the mixture. The Schlenk tube was immersed into a pre-heated oil bath at 100  $^{\circ}$ C. After 14 h, the oil bath was removed, and the Schlenk tube was allowed to cool to room temperature. The reaction mixture was filtered through Celite and eluted with EtOAc (3  $\times$  4 mL). The filtrate was evaporated under reduced pressure. Purification by flash silica gel column chromatography (hexanes/EtOAc = 20:1 v/v) afforded 209 mg of the title compound as a white solid (82% yield).

$R_f$  = 0.56 (hexanes/EtOAc = 6:1 v/v).

#### NMR Spectroscopy:

<sup>1</sup>H NMR (500 MHz, CDCl<sub>3</sub>, 25  $^{\circ}$ C,  $\delta$ ): 7.85 (dd,  $J$  = 8.2, 1.0 Hz, 2H), 7.53 (t,  $J$  = 7.4 Hz, 1H), 7.40 (t,  $J$  = 7.8 Hz, 2H), 6.89 (s, 2H), 6.69 (d,  $J$  = 45.9 Hz, 1H), 2.35 (d,  $J$  = 2.1 Hz, 6H), 2.28 (d,  $J$  = 2.6 Hz, 3H).

<sup>13</sup>C NMR (125 MHz, CDCl<sub>3</sub>, 23  $^{\circ}$ C,  $\delta$ ): 196.6 (d,  $J$  = 21.4 Hz), 139.7 (d,  $J$  = 3.5 Hz), 137.9 (d,  $J$  = 3.3 Hz),



135.0, 133.5, 130.3 (d,  $J = 2.4$  Hz), 129.5 (d,  $J = 17.6$  Hz), 128.67, 128.65 (d,  $J = 3.1$  Hz), 91.9 (d,  $J = 183.6$  Hz), 21.1, 20.4.

$^{19}\text{F}$  NMR (470 MHz,  $\text{CDCl}_3$ , 25 °C,  $\delta$ ):  $-180.9$  (d,  $J = 45.6$  Hz).

HRMS-FIA( $m/z$ ) calc'd for  $\text{C}_{17}\text{H}_{17}\text{FNaO}$  [ $\text{M}+\text{Na}$ ] $^+$ : 279.1156; found: 279.1149.

### (3-Chloro)phenyl-fluoroacetophenone (S2)

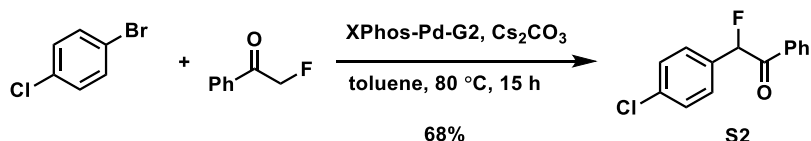

4-Chloro-bromobenzene (191 mg, 1.00 mmol, 1.00 equiv.), XPhos-Pd-G2 (23.6 mg, 30.0  $\mu\text{mol}$ , 3.00 mol%) and  $\text{Cs}_2\text{CO}_3$  (489 mg, 1.50 mmol, 1.50 equiv.) were added to a flame-dried Schlenk tube. The Schlenk tube was evacuated and back-filled with nitrogen (3  $\times$ ). Toluene (5 mL), and 2-fluoroacetophenone (145  $\mu\text{L}$ , 1.20 mmol, 1.20 equiv.) were added to the mixture. The Schlenk tube was immersed into a pre-heated oil bath at 80 °C. After 15 h, the oil bath was removed, and the Schlenk tube was allowed to cool to room temperature. The reaction mixture was filtered through Celite and eluted with EtOAc (3  $\times$  4 mL). The filtrate was evaporated under reduced pressure. Purification by flash silica gel column chromatography (hexanes/EtOAc = 15:1 v/v) afforded 170 mg of the title compound as an off-white solid (68% yield).

$R_f = 0.48$  (hexanes/EtOAc = 6:1 v/v).

### NMR Spectroscopy:

$^1\text{H}$  NMR (500 MHz,  $\text{CDCl}_3$ , 23 °C,  $\delta$ ): 7.92 (d,  $J = 6.9$  Hz, 2H), 7.56 (t,  $J = 7.4$  Hz, 1H), 7.46–7.40 (m, 4H), 7.37 (dd,  $J = 8.8, 1.0$  Hz, 2H), 6.48 (d,  $J = 48.4$  Hz, 1H).

$^{13}\text{C}$  NMR (125 MHz,  $\text{CDCl}_3$ , 25 °C,  $\delta$ ): 195.1 (d,  $J = 21.6$  Hz), 136.9 (d,  $J = 3.2$  Hz), 135.1, 134.9, 133.9 (d,  $J = 20.3$  Hz), 130.5, 130.2 (d,  $J = 3.0$  Hz), 129.9, 129.7 (d,  $J = 5.6$  Hz), 94.3 (d,  $J = 186.4$  Hz).

$^{19}\text{F}$  NMR (470 MHz,  $\text{CDCl}_3$ , 23 °C,  $\delta$ ):  $-179.6$  (d,  $J = 48.9$  Hz).

HRMS-FIA( $m/z$ ) calc'd for  $\text{C}_{14}\text{H}_{10}\text{ClFNaO}$  [ $\text{M}+\text{Na}$ ] $^+$ : 271.0296; found: 271.0307.

### (1-Fluoro-2-oxo-2-phenylethyl)-fenofibrate (S3)

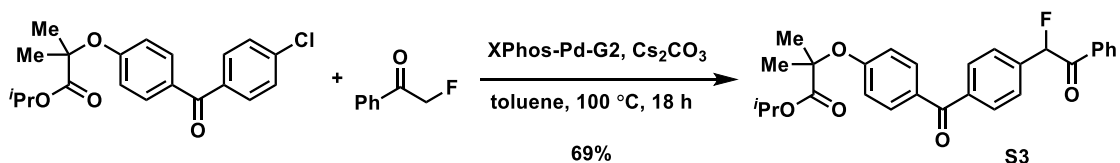

Fenofibrate (361 mg, 1.00 mmol, 1.00 equiv.), XPhos-Pd-G2 (23.6 mg, 30.0  $\mu\text{mol}$ , 3.00 mol%) and  $\text{Cs}_2\text{CO}_3$  (489 mg, 1.50 mmol, 1.50 equiv.) were added to a flame-dried Schlenk tube. The Schlenk tube was

evacuated and back-filled with nitrogen (3 ×). Toluene (5 mL) and 2-fluoroacetophenone (145 μL, 1.20 mmol, 1.20 equiv.) were added to the mixture. The Schlenk tube was immersed into a pre-heated oil bath at 100 °C. After 18 h, the oil bath was removed, and the Schlenk tube was allowed to cool to room temperature. The reaction mixture was filtered through Celite and eluted with EtOAc (3 × 4 mL). The filtrate was evaporated under reduced pressure. Purification by flash silica gel column chromatography (hexanes/EtOAc = 8:1 v/v) afforded 320 mg of the title compound as an orange liquid (69% yield).

$R_f = 0.23$  (hexanes/EtOAc = 6:1 v/v).

#### NMR Spectroscopy:

$^1\text{H NMR}$  (500 MHz,  $\text{CDCl}_3$ , 25 °C,  $\delta$ ): 7.97 (d,  $J = 8.0$  Hz, 2H), 7.76 (d,  $J = 8.5$  Hz, 2H), 7.73 (d,  $J = 9.0$  Hz, 2H), 7.61–7.56 (m, 3H), 7.45 (t,  $J = 8.0$  Hz, 2H), 6.84 (d,  $J = 7.0$  Hz, 2H), 6.56 (d,  $J = 48.5$  Hz, 1H), 5.07 (sep,  $J = 6.3$  Hz, 1H), 1.65 (s, 6H), 1.19 (d,  $J = 6.0$  Hz, 6H).

$^{13}\text{C NMR}$  (125 MHz,  $\text{CDCl}_3$ , 25 °C,  $\delta$ ): 194.8, 194.1 (d,  $J = 22.6$  Hz), 173.2, 159.9, 139.2 (d,  $J = 2.3$  Hz), 137.9 (d,  $J = 19.3$  Hz), 134.2, 134.0, 132.2, 130.4, 130.2, 129.3 (d,  $J = 3.2$  Hz), 128.9, 126.9 (d,  $J = 6.6$  Hz), 117.3, 93.8 (d,  $J = 187.4$  Hz), 79.5, 69.5, 25.5, 21.6.

$^{19}\text{F NMR}$  (470 MHz,  $\text{CDCl}_3$ , 24 °C,  $\delta$ ): –181.9 (d,  $J = 48.5$  Hz).

**HRMS-FIA(m/z)** calc'd for  $\text{C}_{28}\text{H}_{28}\text{FO}_5$   $[\text{M}+\text{H}]^+$ : 463.1915; found: 463.1910.

#### (1-Fluoro-2-oxo-2-phenylethyl)-DAA1106 (S4)

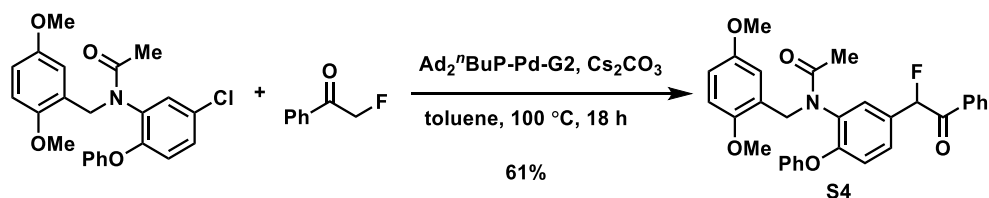

*N*-(5-Chloro-2-phenoxyphenyl)-*N*-(2,5-dimethoxybenzyl)acetamide<sup>4</sup> (412 mg, 1.00 mmol, 1.00 equiv.),  $\text{Ad}_2^n\text{BuP-Pd-G2}$  (20.1 mg, 30.0 μmol, 3.00 mol%) and  $\text{Cs}_2\text{CO}_3$  (489 mg, 1.50 mmol, 1.50 equiv.) were added to a flame-dried Schlenk tube. The Schlenk tube was evacuated and back-filled with nitrogen (3 ×). Toluene (5 mL), and 2-fluoroacetophenone (145 μL, 1.20 mmol, 1.20 equiv.) were added to the mixture. The Schlenk tube was immersed into a pre-heated oil bath at 100 °C. After 18 h, the oil bath was removed, and the Schlenk tube was allowed to cool to room temperature. The reaction mixture was filtered through Celite and eluted with EtOAc (3 × 4 mL). The filtrate was evaporated under reduced pressure. Purification by flash silica gel column chromatography (hexanes/EtOAc = 2:1 v/v) afforded 315 mg of the title compound as a yellow liquid (61% yield).

$R_f = 0.20$  (hexanes/EtOAc = 2:1 v/v).

#### NMR Spectroscopy:

**<sup>1</sup>H NMR** (500 MHz, CDCl<sub>3</sub>, 55 °C, compound exists as a 1:1 mixture of rotamers  $\delta$ ): 7.86 (d,  $J$  = 7.8 Hz, 2H), 7.57 (t,  $J$  = 7.4 Hz, 1H), 7.43 (t,  $J$  = 7.6 Hz, 2H), 7.33 (t,  $J$  = 7.7 Hz, 2H), 7.30–7.22 (m, 1H), 7.20–7.10 (m, 2H), 6.98–6.86 (m, 3H), 6.81 (d,  $J$  = 8.5 Hz, 1H), 6.72–6.61 (m, 1H), 6.56 (dd,  $J$  = 22.7, 9.0 Hz, 1H), 6.32 (d,  $J$  = 48.6 Hz, 1H), 5.24–5.03 (m, 1H), 4.79–4.63 (m, 1H), 3.65 (s, 3H), 3.44 (d,  $J$  = 11.3 Hz, 3H), 1.88 (d,  $J$  = 11.3 Hz, 3H).

**<sup>13</sup>C NMR** (125 MHz, CDCl<sub>3</sub>, 25 °C, compound exists as a 1:1 mixture of rotamers,  $\delta$ ): 193.9 (d,  $J$  = 22.7 Hz), 193.7 (d,  $J$  = 22.7 Hz), 170.7, 170.7, 155.3, 155.3, 155.2 (d,  $J$  = 2.6 Hz), 155.1 (d,  $J$  = 2.2 Hz), 153.5 (d,  $J$  = 4.0 Hz), 151.9 (d,  $J$  = 7.2 Hz), 134.0, 134.0, 133.2 (d,  $J$  = 5.5 Hz), 130.1, 129.1 (d,  $J$  = 2.8 Hz), 129.1 (d,  $J$  = 2.6 Hz), 128.9, 128.9, 128.4 (d,  $J$  = 4.9 Hz), 128.3 (d,  $J$  = 5.1 Hz), 126.2, 126.1, 124.8, 119.9, 118.04, 117.99, 116.7, 116.7, 113.9, 111.5, 111.4, 92.9 (d,  $J$  = 186.4 Hz), 92.8 (d,  $J$  = 186.4 Hz), 55.79, 55.75, 55.7, 46.0, 45.8, 22.4.

**<sup>19</sup>F NMR** (470 MHz, CDCl<sub>3</sub>, 25 °C, compound exists as a 1:1 mixture of rotamers,  $\delta$ ): –176.6 (d,  $J$  = 48.9 Hz), –176.7 (d,  $J$  = 47.5 Hz).

**HRMS-FIA(m/z)** calc'd for C<sub>31</sub>H<sub>29</sub>FNO<sub>5</sub> [M+H]<sup>+</sup>: 514.2024; found: 514.2043.

#### (1-Fluoro-2-oxo-2-phenylethyl)-estrone (S5)

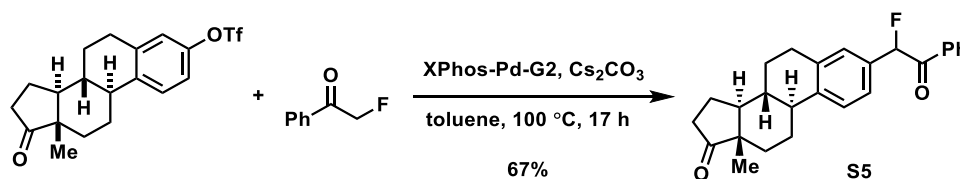

Estrone-triflate (402 mg, 1.00 mmol, 1.00 equiv.)<sup>5</sup>, XPhos-Pd-G2 (23.6 mg, 30.0  $\mu$ mol, 3.00 mol%) and Cs<sub>2</sub>CO<sub>3</sub> (489 mg, 1.50 mmol, 1.50 equiv.) were added to a flame-dried Schlenk tube. The Schlenk tube was evacuated and back-filled with nitrogen (3  $\times$ ). Toluene (5 mL) and 2-fluoroacetophenone (145  $\mu$ L, 1.20 mmol, 1.20 equiv.) were added to the mixture. The Schlenk tube was immersed into a pre-heated oil bath at 100 °C. After 17 h, the oil bath was removed, and the Schlenk tube was allowed to cool to room temperature. The reaction mixture was filtered through Celite and eluted with EtOAc (3  $\times$  4 mL). The filtrate was evaporated under reduced pressure. Purification by flash silica gel column chromatography (hexanes/EtOAc = 6:1 v/v) afforded 262 mg of the title compound as a yellow-white solid (67% yield).

**R<sub>f</sub>** = 0.31 (hexanes/EtOAc = 4:1 v/v).

#### NMR Spectroscopy:

**<sup>1</sup>H NMR** (500 MHz, CDCl<sub>3</sub>, 25 °C,  $\delta$ ): 7.95 (d,  $J$  = 7.5 Hz, 2H), 7.54 (t,  $J$  = 7.5 Hz, 1H), 7.42 (t,  $J$  = 7.5 Hz, 2H), 7.31 (d,  $J$  = 6.5 Hz, 1H), 7.2, 7.20 (s, 1H), 6.47 (d,  $J$  = 48.5 Hz, 1H), 2.91–2.87 (m, 2H), 2.52–2.46 (m, 1H), 2.41–2.36 (m, 1H), 2.24–2.30 (m, 1H), 2.17–2.09 (m, 1H), 2.07–1.98 (m, 2H), 1.97–1.93 (m, 1H), 1.65–1.37 (m, 6H), 0.88 (d,  $J$  = 2.0 Hz, 3H).

**<sup>13</sup>C NMR** (125 MHz, CDCl<sub>3</sub>, 25 °C,  $\delta$ ): 220.7, 194.3 (d,  $J$  = 21.5 Hz), 141.6, 137.6, 134.1, 133.8, 131.6 (d,

$J = 20.4$  Hz), 129.1, 128.7, 128.0 (d,  $J = 5.4$  Hz), 126.2, 125.0 (d,  $J = 5.3$  Hz), 93.7 (d,  $J = 185.2$  Hz), 50.5, 47.9, 44.4, 37.9, 35.9, 31.6, 29.3, 26.3, 25.6, 21.6, 13.9.

$^{19}\text{F}$  NMR (470 MHz,  $\text{CDCl}_3$ , 25 °C,  $\delta$ ):  $-177.2$  (d,  $J = 49.9$  Hz).

HRMS-FIA( $m/z$ ) calc'd for  $\text{C}_{26}\text{H}_{27}\text{FNaO}_2$  [ $\text{M}+\text{Na}$ ] $^+$ : 413.1887; found: 413.1895.

### (1-Fluoro-2-oxo-2-phenylethyl)-claritin (S6)

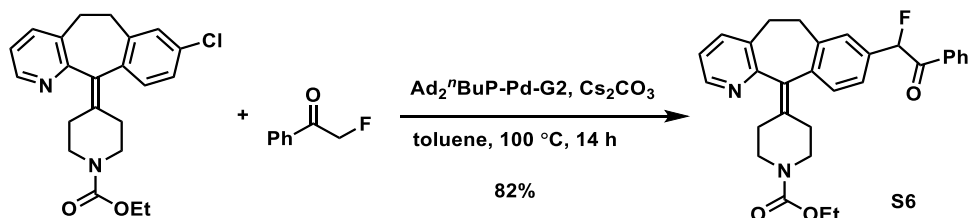

Claritin (383 mg, 1.00 mmol, 1.00 equiv.),  $\text{PAd}_2^t\text{Bu-Pd-G2}$  (20.1 mg, 30.0  $\mu\text{mol}$ , 3.00 mol%) and  $\text{Cs}_2\text{CO}_3$  (489 mg, 1.50 mmol, 1.50 equiv.) were added to a flame-dried Schlenk tube. The Schlenk tube was evacuated and back-filled with nitrogen (3  $\times$ ). Toluene (5 mL), and 2-fluoroacetophenone (145  $\mu\text{L}$ , 1.20 mmol, 1.20 equiv.) were added to the mixture. The Schlenk tube was immersed into a pre-heated oil bath at 100 °C. After 14 h, the oil bath was removed, and the Schlenk tube was allowed to cool to room temperature. The reaction mixture was filtered through Celite and eluted with EtOAc (3  $\times$  4 mL). The filtrate was evaporated under reduced pressure. Purification by flash silica gel column chromatography (hexanes/EtOAc = 1:2 v/v) afforded 398 mg of the title compound as a yellow solid (82% yield).

$R_f = 0.25$  (hexanes/EtOAc = 1:2 v/v).

### NMR Spectroscopy:

$^1\text{H}$  NMR (500 MHz,  $\text{CDCl}_3$ , 24 °C,  $\delta$ ): 8.38 (d,  $J = 4.9$  Hz, 1H), 7.99–7.91 (m, 2H), 7.60–7.50 (m, 1H), 7.46–7.39 (m, 3H), 7.33–7.27 (m, 2H), 7.22 (d,  $J = 7.8$  Hz, 1H), 7.13–7.04 (m, 1H), 6.46 (d,  $J = 48.6$  Hz, 1H), 4.12 (q,  $J = 7.1$  Hz, 2H), 3.79 (brs, 2H), 3.48–3.27 (m, 2H), 3.20–3.04 (m, 2H), 2.90–2.74 (m, 2H), 2.55–2.41 (m, 1H), 2.38–2.24 (m, 3H), 1.24 (t,  $J = 7.1$  Hz, 2H).

$^{13}\text{C}$  NMR (125 MHz,  $\text{CDCl}_3$ , 25 °C, compound exists as a 1:1 mixture of rotamers,  $\delta$ ): 194.2 (d,  $J = 21.7$  Hz), 194.2 (d,  $J = 21.8$  Hz), 157.2, 155.6, 146.8, 140.8, 138.8, 137.7 (d,  $J = 4.2$  Hz), 137.6 (d,  $J = 3.2$  Hz), 134.8, 134.7, 134.2, 134.2, 134.0, 133.7, 133.5, 133.3, 130.21, 130.19, 129.34 (d,  $J = 2.7$  Hz), 129.31 (d,  $J = 2.7$  Hz), 128.9, 128.1 (d,  $J = 5.0$  Hz), 125.5 (d,  $J = 5.5$  Hz), 125.4, 122.4, 93.7 (d,  $J = 185.6$  Hz), 93.6 (d,  $J = 185.5$  Hz), 61.5, 45.0, 44.9, 32.0, 31.7, 30.9, 30.7, 14.8.

$^{19}\text{F}$  NMR (470 MHz,  $\text{CDCl}_3$ , 24 °C,  $\delta$ ):  $-178.2$  (d,  $J = 48.9$  Hz).

HRMS-FIA( $m/z$ ) calc'd for  $\text{C}_{30}\text{H}_{29}\text{FNaN}_2\text{O}_3$  [ $\text{M}+\text{Na}$ ] $^+$ : 507.2054; found: 507.2070.

**4-Bromo-*N,N*-diethyl-3-methoxybenzamide (S12)**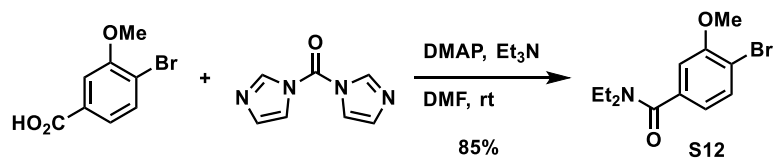

To a solution of 4-bromo-3-methoxybenzoic acid (1.00 g, 4.33 mmol, 1.00 equiv.) in DMF (20 mL) were added CDI (1.05 g, 6.50 mmol, 1.50 equiv.), DMAP (793 mg, 6.50 mmol, 1.50 equiv.) and Et<sub>3</sub>N (0.899 mL, 8.66 mmol, 2 equiv.). The reaction mixture was stirred at room temperature overnight. Water (40 mL) was added and extracted with EtOAc (3 × 30 mL). The combined organic layer was washed with water (30 mL) and brine (30 mL). The solution was dried with MgSO<sub>4</sub>. After the solvent was removed in vacuo, purification by flash silica gel column chromatography (hexanes/EtOAc = 2:1 v/v) afforded 1.05 g of the title compound as a white solid (85% yield).

R<sub>f</sub> = 0.19 (hexanes/EtOAc = 12:1 v/v).

**NMR Spectroscopy:**

<sup>1</sup>H NMR (500 MHz, CDCl<sub>3</sub>, -15 °C, compound exists as a 1:1 mixture of rotamers, δ): 7.55 (d, *J* = 7.9 Hz, 1H), 6.92 (s, 1H), 6.83 (d, *J* = 7.9 Hz, 1H), 3.92 (s, 3H), 3.53 (q, *J* = 7.1 Hz, 2H), 3.24 (q, *J* = 7.1 Hz, 2H), 1.24 (t, *J* = 7.1 Hz, 3H), 1.12 (t, *J* = 7.0 Hz, 3H).

<sup>13</sup>C NMR (125 MHz, CDCl<sub>3</sub>, -15 °C, compound exists as a 1:1 mixture of rotamers, δ): 170.2, 155.8, 137.5, 133.2, 119.20, 119.17, 112.4, 110.0, 109.9, 56.4, 56.3, 43.3, 39.3, 14.43, 14.39, 13.0, 12.9.

HRMS-FIA(*m/z*) calc'd for C<sub>12</sub>H<sub>16</sub>BrNaNO<sub>2</sub> [M+Na]<sup>+</sup>: 308.0257; found: 308.0271.

**(1-Fluoro-2-oxo-2-phenylethyl)-analepticon (S7)**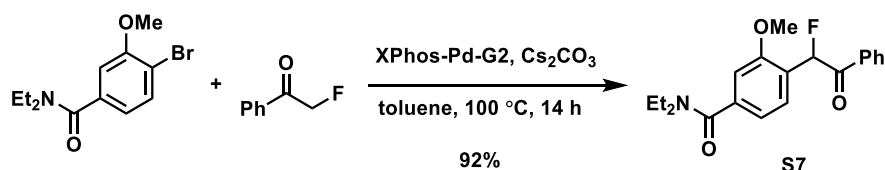

4-Bromo-*N,N*-diethyl-3-methoxybenzamide (286 mg, 1.00 mmol, 1.00 equiv.), XPhos-Pd-G2 (23.6 mg, 30.0 μmol, 3.00 mol%) and Cs<sub>2</sub>CO<sub>3</sub> (489 mg, 1.50 mmol, 1.50 equiv.) were added to a flame-dried Schlenk tube. The Schlenk tube was evacuated and back-filled with nitrogen (3 ×). Toluene (5 mL), and 2-fluoroacetophenone (145 μL, 1.20 mmol, 1.20 equiv.) were added to the mixture. The Schlenk tube was immersed into a pre-heated oil bath at 100 °C. After 14 h, the oil bath was removed, and the Schlenk tube was allowed to cool to room temperature. The reaction mixture was filtered through Celite and eluted with EtOAc (3 × 4 mL). The filtrate was evaporated under reduced pressure. Purification by flash silica gel column chromatography (hexanes/EtOAc = 3:2 v/v) afforded 315 mg of the title compound as a colorless liquid (92% yield).

$R_f = 0.37$  (hexanes/EtOAc = 1:1 v/v).

### NMR Spectroscopy:

**$^1\text{H}$  NMR** (500 MHz,  $\text{CDCl}_3$ ,  $-15\text{ }^\circ\text{C}$ , compound exists as a 1:1 mixture of rotamers,  $\delta$ ): 7.90 (d,  $J = 7.8$  Hz, 2H), 7.55 (t,  $J = 7.4$  Hz, 1H), 7.40 (t,  $J = 7.6$  Hz, 2H), 7.34 (d,  $J = 7.8$  Hz, 1H), 7.10 (d,  $J = 47.3$  Hz, 1H), 6.97 (s, 1H), 6.91 (d,  $J = 7.8$  Hz, 1H), 3.96 (s, 3H), 3.51 (q,  $J = 7.2$  Hz, 2H), 3.22 (q,  $J = 7.1$  Hz, 2H), 1.22 (t,  $J = 7.1$  Hz, 3H), 1.10 (t,  $J = 7.1$  Hz, 3H).

**$^{13}\text{C}$  NMR** (125 MHz,  $\text{CDCl}_3$ ,  $-15\text{ }^\circ\text{C}$ , compound exists as a 1:1 mixture of rotamers,  $\delta$ ): 194.0 (d,  $J = 20.5$  Hz), 170.3, 156.7 (d,  $J = 3.4$  Hz), 140.2 (d,  $J = 4.4$  Hz), 134.1, 133.4, 129.4, 128.8, 128.5, 123.1 (d,  $J = 19.6$  Hz), 118.5, 109.5, 86.7 (d,  $J = 180.6$  Hz), 56.0, 55.9, 43.3, 39.2, 14.4, 14.3, 12.90, 12.87.

**$^{19}\text{F}$  NMR** (470 MHz,  $\text{CDCl}_3$ ,  $25\text{ }^\circ\text{C}$ ,  $\delta$ ):  $-181.9$  (d,  $J = 47.5$  Hz).

**HRMS-FIA(m/z)** calc'd for  $\text{C}_{20}\text{H}_{23}\text{FNO}_3$   $[\text{M}+\text{H}]^+$ : 344.1656; found: 344.1663.

### (1-Fluoro-2-oxo-2-phenylethyl)-*N*-Boc-fluoxetine (S8)

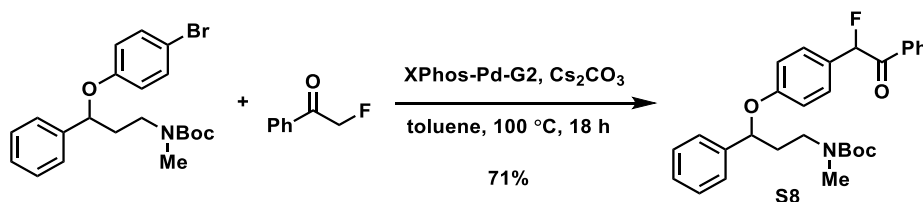

*t*-Butyl (3-(4-bromophenoxy)-3-phenylpropyl)(methyl)carbamate<sup>6</sup> (420 mg, 1.00 mmol, 1.00 equiv.), XPhos-Pd-G2 (23.6 mg, 30.0  $\mu\text{mol}$ , 3.00 mol%) and Cs<sub>2</sub>CO<sub>3</sub> (489 mg, 1.50 mmol, 1.50 equiv.) were added to a flame-dried Schlenk tube. The Schlenk tube was evacuated and back-filled with nitrogen (3  $\times$ ). Toluene (5 mL), and 2-fluoroacetophenone (145  $\mu\text{L}$ , 1.20 mmol, 1.20 equiv.) were added to the mixture. The Schlenk tube was immersed into a pre-heated oil bath at 100  $^\circ\text{C}$ . After 18 h, the oil bath was removed, and the Schlenk tube was allowed to cool to room temperature. The reaction mixture was filtered through Celite and eluted with EtOAc (3  $\times$  4 mL). The filtrate was evaporated under reduced pressure. Purification by flash silica gel column chromatography (hexanes/EtOAc = 5:1 v/v) afforded 341 mg of the title compound as a yellow liquid (71% yield).

$R_f = 0.28$  (hexanes/EtOAc = 4:1 v/v).

### NMR Spectroscopy:

**$^1\text{H}$  NMR** (500 MHz,  $\text{CDCl}_3$ ,  $55\text{ }^\circ\text{C}$ ,  $\delta$ ): 7.91 (d,  $J = 7.7$  Hz, 2H), 7.52 (t,  $J = 7.5$  Hz, 1H), 7.40 (t,  $J = 7.7$  Hz, 2H), 7.36–7.30 (m, 6H), 7.29–7.22 (m, 1H), 6.87 (d,  $J = 8.3$  Hz, 2H), 6.40 (d,  $J = 48.9$  Hz, 1H), 5.13 (dd,  $J = 8.7, 4.2$  Hz, 1H), 3.48–3.30 (m, 2H), 2.84 (s, 3H), 2.26–2.13 (m, 1H), 2.13–2.02 (m, 1H), 1.38 (s, 9H).

**$^{13}\text{C}$  NMR** (125 MHz,  $\text{CDCl}_3$ ,  $55\text{ }^\circ\text{C}$ , compound exists as a 1:1 mixture of diastereoisomers,  $\delta$ ): 194.4 (d,  $J = 22.0$  Hz), 194.4 (d,  $J = 22.0$  Hz), 159.4, 155.8, 141.4, 134.6, 133.6, 129.27 (d,  $J = 4.9$  Hz), 129.25 (d,  $J$

= 4.9 Hz), 129.2, 129.1, 128.9, 128.7, 127.9, 126.8 (d,  $J = 20.7$  Hz), 125.9, 116.6, 93.6 (d,  $J = 185.3$  Hz), 79.5, 78.3, 45.9, 37.1, 34.6, 28.5.

$^{19}\text{F}$  NMR (470 MHz,  $\text{CDCl}_3$ , 25 °C,  $\delta$ ): -174.4 (brs).

HRMS-FIA( $m/z$ ) calc'd for  $\text{C}_{29}\text{H}_{32}\text{FNaNO}_4$  [ $\text{M}+\text{Na}$ ] $^+$ : 500.2208; found: 500.2229.

#### (1-Fluoro-2-oxo-2-phenylethyl)-SC-58125 (S9)

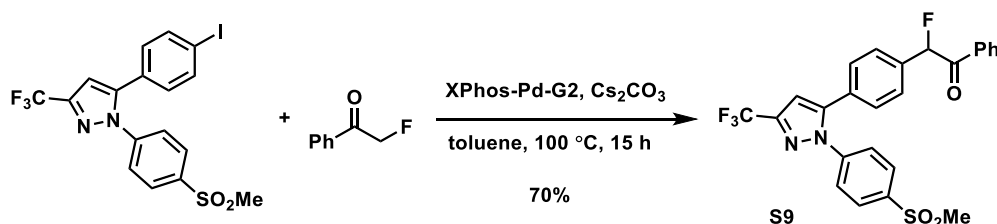

Aryl iodide<sup>7</sup> (492 mg, 1.00 mmol, 1.00 equiv.), XPhos-Pd-G2 (23.6 mg, 30.0  $\mu\text{mol}$ , 3.00 mol%) and  $\text{Cs}_2\text{CO}_3$  (489 mg, 1.50 mmol, 1.50 equiv.) were added to a flame-dried Schlenk tube. The Schlenk tube was evacuated and back-filled with nitrogen (3  $\times$ ). Toluene (5 mL), and 2-fluoroacetophenone (145  $\mu\text{L}$ , 1.20 mmol, 1.20 equiv.) were added to the mixture. The Schlenk tube was immersed into a pre-heated oil bath at 100 °C. After 15 h, the oil bath was removed, and the Schlenk tube was allowed to cool to room temperature. The reaction mixture was filtered through Celite and eluted with EtOAc (3  $\times$  4 mL). The filtrate was evaporated under reduced pressure. Purification by flash silica gel column chromatography (hexanes/EtOAc = 3:1 v/v) afforded 350 mg of the title compound as a yellow solid (70% yield).

$R_f = 0.23$  (hexanes/EtOAc = 2:1 v/v).

#### NMR Spectroscopy:

$^1\text{H}$  NMR (500 MHz,  $\text{CDCl}_3$ , 23 °C,  $\delta$ ): 7.96 (d,  $J = 7.4$  Hz, 2H), 7.94–7.88 (m, 2H), 7.61 (t,  $J = 7.5$  Hz, 1H), 7.56–7.43 (m, 6H), 7.28 (d,  $J = 7.8$  Hz, 2H), 6.78 (s, 1H), 6.51 (d,  $J = 48.3$  Hz, 1H), 3.07 (s, 3H).

$^{13}\text{C}$  NMR (125 MHz,  $\text{CDCl}_3$ , 23 °C,  $\delta$ ): 194.0 (d,  $J = 22.1$  Hz), 144.6 (d,  $J = 38.7$  Hz), 144.3, 143.2, 140.3, 136.0 (d,  $J = 20.3$  Hz), 134.3, 134.0, 129.8 (d,  $J = 2.3$  Hz), 129.5, 129.3 (d,  $J = 3.7$  Hz), 129.0, 128.8, 127.8 (d,  $J = 6.1$  Hz), 125.8, 121.0 (q,  $J = 269.2$  Hz), 107.2, 93.5 (d,  $J = 187.5$  Hz), 44.6.

$^{19}\text{F}$  NMR (470 MHz,  $\text{CDCl}_3$ , 23 °C,  $\delta$ ): -65.9, -182.0 (d,  $J = 48.4$  Hz).

HRMS-FIA( $m/z$ ) calc'd for  $\text{C}_{25}\text{H}_{19}\text{F}_4\text{N}_2\text{O}_3\text{S}$  [ $\text{M}+\text{H}$ ] $^+$ : 503.1047; found: 503.1045.

### Hydroquinidine 4-(1-fluoro-2-oxo-2-phenylethyl)-benzoate (S10)

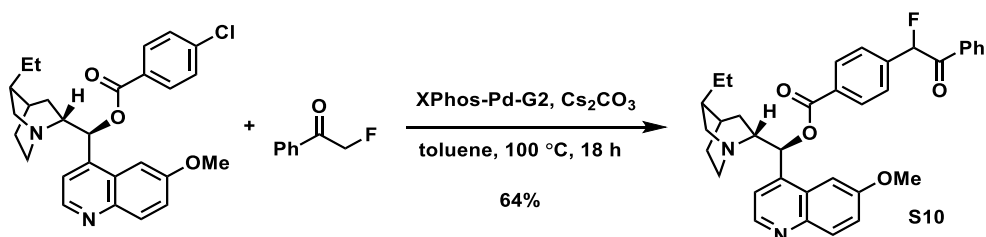

Hydroquinidine 4-chlorobenzoate (465 mg, 1.00 mmol, 1.00 equiv.), XPhos-Pd-G2 (23.6 mg, 30.0  $\mu\text{mol}$ , 3.00 mol%) and  $\text{Cs}_2\text{CO}_3$  (489 mg, 1.50 mmol, 1.50 equiv.) were added to a flame-dried Schlenk tube. The Schlenk tube was evacuated and back-filled with nitrogen (3  $\times$ ). Toluene (5 mL), and 2-fluoroacetophenone (145  $\mu\text{L}$ , 1.20 mmol, 1.20 equiv.) were added to the mixture. The Schlenk tube was immersed into a pre-heated oil bath at 100 °C. After 18 h, the oil bath was removed, and the Schlenk tube was allowed to cool to room temperature. The reaction mixture was filtered through Celite and eluted with EtOAc (3  $\times$  4 mL). The filtrate was evaporated under reduced pressure. Purification by flash silica gel column chromatography (hexanes/EtOAc/DCM/ $\text{Et}_3\text{N}$  = 4:1:1:1 v/v/v/v to 2:1:1:1 v/v/v/v) afforded 362 mg of the title compound as an off-white solid (64% yield).

$R_f$  = 0.26 (hexanes/EtOAc/DCM/ $\text{Et}_3\text{N}$  = 3:1:1:1 v/v/v/v).

#### NMR Spectroscopy:

$^1\text{H NMR}$  (500 MHz,  $\text{CDCl}_3$ , 55 °C,  $\delta$ ): 8.70 (d,  $J$  = 4.6 Hz, 1H), 8.12 (d,  $J$  = 8.1 Hz, 2H), 8.01 (d,  $J$  = 9.2 Hz, 1H), 7.94 (d,  $J$  = 7.8 Hz, 2H), 7.66–7.51 (m, 5H), 7.43 (t,  $J$  = 7.8 Hz, 2H), 7.40–7.34 (m, 2H), 6.91 (brs, 1H), 6.50 (d,  $J$  = 48.5 Hz, 1H), 3.99 (s, 3H), 3.44 (q,  $J$  = 8.6 Hz, 1H), 3.14–2.57 (m, 4H), 2.11–1.85 (m, 1H), 1.79 (s, 1H), 1.72–1.43 (m, 5H), 0.89 (t,  $J$  = 7.1 Hz, 3H).

$^{13}\text{C NMR}$  (125 MHz,  $\text{CDCl}_3$ , 25 °C, compound exists as a 1:1 mixture of diastereoisomers,  $\delta$ ): 193.9 (d,  $J$  = 21.3 Hz), 193.9 (d,  $J$  = 21.4 Hz), 164.9, 158.2, 147.4, 144.8, 143.5, 139.6 (d,  $J$  = 20.3 Hz), 134.2, 133.8, 131.9, 130.7, 130.4, 129.3 (d,  $J$  = 1.4 Hz), 129.2 (d,  $J$  = 1.4 Hz), 128.9, 127.1 (d,  $J$  = 6.3 Hz), 127.0 (d,  $J$  = 6.3 Hz), 122.1, 118.6, 101.4, 93.6 (d,  $J$  = 187.9 Hz), 93.6 (d,  $J$  = 187.8 Hz), 74.2, 59.4, 55.9, 50.8, 49.9, 37.2, 26.9, 26.1, 25.5, 23.7, 11.9.

$^{19}\text{F NMR}$  (470 MHz,  $\text{CDCl}_3$ , 23 °C, compound exists as a 1:1 mixture of diastereoisomers,  $\delta$ ): –183.2 (d,  $J$  = 47.9 Hz), –183.4 (d,  $J$  = 47.5 Hz)

HRMS-FIA( $m/z$ ) calc'd for  $\text{C}_{35}\text{H}_{36}\text{FN}_2\text{O}_4$  [ $\text{M}+\text{H}$ ] $^+$ : 567.2654; found: 567.2677.

#### Phenyl-bromo-fluoroacetophenone (2r')

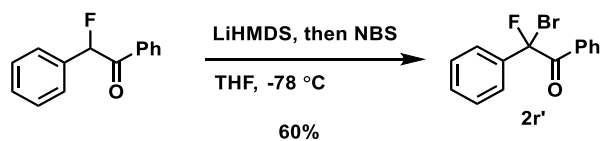



Phenyl-fluoroacetophenone<sup>1</sup> (428 mg, 2.00 mmol, 1.00 equiv.) was dissolved in dry THF (16 mL), and then the solution was cooled to  $-78\text{ }^{\circ}\text{C}$ . LiHMDS (1.0 M in THF, 2.10 mL, 2.10 mmol, 1.05 equiv.) was added dropwise. The reaction mixture was stirred at for 50 min. NBS (392 mg, 1.10 mmol, 1.10 equiv.) was added in one portion. After 3 h, a saturated aqueous solution of  $\text{NH}_4\text{Cl}$  (15 mL) was added and the mixture was extracted with EtOAc ( $3 \times 15\text{ mL}$ ). The combined organic layers were dried over anhydrous  $\text{NaSO}_4$  and concentrated in vacuo to give a crude residue. Purification by flash silica gel column chromatography (hexanes/EtOAc = 40:1 v/v) afforded 354 mg of the title compound as a colorless liquid (60% yield).

$R_f = 0.52$  (hexanes/EtOAc = 10:1 v/v).

#### NMR Spectroscopy:

**$^1\text{H}$  NMR** (500 MHz,  $\text{CDCl}_3$ ,  $25\text{ }^{\circ}\text{C}$ ,  $\delta$ ): 8.04 (d,  $J = 7.6\text{ Hz}$ , 2H), 7.75–7.67 (m, 2H), 7.60 (td,  $J = 7.5, 1.1\text{ Hz}$ , 1H), 7.51–7.41 (m, 5H).

**$^{13}\text{C}$  NMR** (125 MHz,  $\text{CDCl}_3$ ,  $25\text{ }^{\circ}\text{C}$ ,  $\delta$ ): 89.3 (d,  $J = 28.5\text{ Hz}$ ), 137.4 (d,  $J = 21.4\text{ Hz}$ ), 133.9, 132.2 (d,  $J = 3.1\text{ Hz}$ ), 130.8 (d,  $J = 4.9\text{ Hz}$ ), 130.4, 128.7, 128.5, 126.2 (d,  $J = 7.7\text{ Hz}$ ), 104.8 (d,  $J = 267.1\text{ Hz}$ ).

**$^{19}\text{F}$  NMR** (470 MHz,  $\text{CDCl}_3$ ,  $23\text{ }^{\circ}\text{C}$ ,  $\delta$ ):  $-112.3$ .

**HRMS-FIA(m/z)** calc'd for  $\text{C}_{14}\text{H}_{10}\text{BrFNao}$  [ $\text{M}+\text{Na}$ ]<sup>+</sup>: 314.9791; found: 314.9784.

#### Quinoline-6-bromo-fluoroacetophenone (2m')

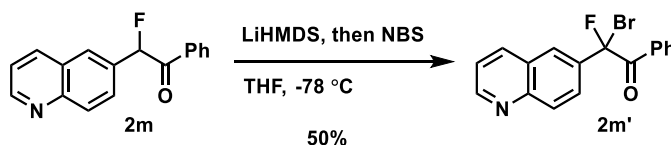

Quinoline-6-fluoroacetophenone (265 mg, 1.00 mmol, 1.00 equiv.) was dissolved in dry THF (10 mL), and then the solution was cooled to  $-78\text{ }^{\circ}\text{C}$ . LiHMDS (1.0 M in THF, 1.20 mL, 1.20 mmol, 1.20 equiv.) was added dropwise. The reaction mixture was stirred at for 45 min. NBS (214 mg, 1.20 mmol, 1.20 equiv.) was added in one portion. After 45 min, a saturated solution of  $\text{NH}_4\text{Cl}$  (6 mL) and a saturated solution of  $\text{Na}_2\text{S}_2\text{O}_3$  (6 mL) were added and the mixture was extracted with EtOAc ( $3 \times 12\text{ mL}$ ). The combined organic layers were dried over anhydrous  $\text{NaSO}_4$ , and then concentrated in vacuo to give a crude residue. Purification by flash silica gel column chromatography (hexanes/EtOAc = 6:1 v/v) afforded 173 mg of the title compound as an off-white solid (50% yield).

$R_f = 0.30$  (hexanes/EtOAc = 4:1 v/v).

#### NMR Spectroscopy:

**$^1\text{H}$  NMR** (500 MHz,  $\text{CDCl}_3$ ,  $23\text{ }^{\circ}\text{C}$ ,  $\delta$ ): 8.98 (dd,  $J = 4.3, 1.7\text{ Hz}$ , 1H), 8.20 (t,  $J = 8.5\text{ Hz}$ , 2H), 8.14 (d,  $J = 2.2\text{ Hz}$ , 1H), 8.07 (d,  $J = 8.3\text{ Hz}$ , 2H), 7.99 (dd,  $J = 8.9, 2.2\text{ Hz}$ , 1H), 7.59 (t,  $J = 7.5\text{ Hz}$ , 1H), 7.53–7.38 (m, 3H).

**<sup>13</sup>C NMR** (125 MHz, CDCl<sub>3</sub>, 25 °C, δ): 189.1 (d, *J* = 28.5 Hz), 152.0, 148.5, 137.1, 135.6 (d, *J* = 21.3 Hz), 134.2, 132.1 (d, *J* = 3.6 Hz), 130.8 (d, *J* = 5.4 Hz), 130.1, 128.7, 127.5 (d, *J* = 6.0 Hz), 127.5, 125.5 (d, *J* = 9.5 Hz), 122.2, 104.0 (d, *J* = 268.4 Hz).

**<sup>19</sup>F NMR** (470 MHz, CDCl<sub>3</sub>, 23 °C, δ): -114.5.

**HRMS-FIA(m/z)** calc'd for C<sub>17</sub>H<sub>12</sub>BrFNO [M+H]<sup>+</sup>: 344.0081; found: 344.0080.

## Syntheses of Difluoromethyl-arenes

### Difluoromethyl-benzodioxole (3a)

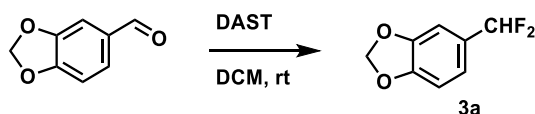

Piperonal (150 mg, 1.00 mmol, 1.00 equiv.) was dissolved in dry DCM (10 mL). DAST (396 μL, 3.00 mmol, 3.00 equiv.) was added to the solution at 0 °C. The reaction mixture was stirred at room temperature for 35 h. Cold water (8 mL) was added. The mixture was extracted with DCM (3 × 4 mL). The combined organic layers were washed with brine (5 mL), dried over Na<sub>2</sub>SO<sub>4</sub> and concentrated in vacuo to give a crude residue. Purification by flash silica gel column chromatography (hexanes/EtOAc = 10/1 v/v) afforded 110 mg of the title compound as a colorless liquid (64% yield).

*R<sub>f</sub>* = 0.52 (hexanes/EtOAc = 4:1 v/v).

### NMR Spectroscopy:

**<sup>1</sup>H NMR** (500 MHz, CDCl<sub>3</sub>, 24 °C, δ): 7.01–6.94 (m, 2H), 6.84 (d, *J* = 7.8 Hz, 1H), 6.54 (t, *J* = 56.6 Hz, 1H), 6.01 (s, 2H).

**<sup>13</sup>C NMR** (125 MHz, CDCl<sub>3</sub>, 25 °C, δ): 149.7, 148.2, 128.4 (t, *J* = 22.8 Hz), 120.3 (t, *J* = 7.1 Hz), 114.8 (t, *J* = 236.8 Hz), 108.4, 105.9 (t, *J* = 5.5 Hz), 101.7.

**<sup>19</sup>F NMR** (470 MHz, CDCl<sub>3</sub>, 24 °C, δ): -110.9 (d, *J* = 55.9 Hz).

**HRMS-FIA(m/z)** calc'd for C<sub>8</sub>H<sub>7</sub>F<sub>2</sub>O<sub>2</sub> [M+H]<sup>+</sup>: 173.0409; found: 173.0406.

### 3-Cyanocyclopropyl-difluoromethylbenzene (3c)

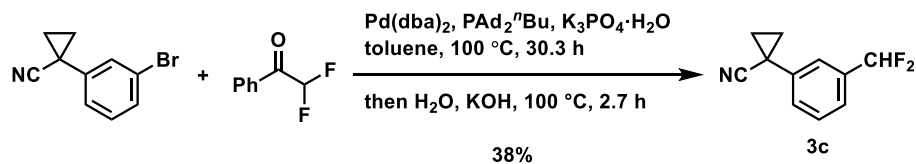

Based on a reported procedure<sup>2</sup>: 1-(3-Bromophenyl)cyclopropanecarbonitrile (222 mg, 1.00 mmol, 1.00 equiv.), Pd(dba)<sub>2</sub> (17.3 mg, 30.0 μmol, 3.00 mol%), PAd<sub>2</sub><sup>n</sup>Bu (14.3 mg, 40.0 μmol, 4.00 mol%) and

$K_3PO_4 \cdot H_2O$  (921 mg, 4.00 mmol, 4.00 equiv.) were added to a flame-dried Schlenk tube. The Schlenk tube was evacuated and back-filled with nitrogen (3  $\times$ ). Toluene (5 mL) and 2,2-difluoroacetophenone (264  $\mu$ L, 2.00 mmol, 2.00 equiv.) were added to the mixture. The Schlenk tube was immersed into a pre-heated oil bath at 100  $^\circ$ C. After 30.3 h, KOH (500 mg, 8.91 mmol, 8.91 equiv.) and  $H_2O$  (250  $\mu$ L) were added to the mixture. After 2.7 h, the oil bath was removed, and the Schlenk tube was allowed to cool to room temperature. The reaction mixture was filtered through Celite and eluted with EtOAc (3  $\times$  4 mL). The filtrate was evaporated under reduced pressure. Purification by flash silica gel column chromatography (hexanes/EtOAc = 15:1 v/v to 10/1 v/v) afforded 114 mg of the title compound as an orange liquid (38% yield).

$R_f$  = 0.29 (hexanes/EtOAc = 5:1 v/v).

#### NMR Spectroscopy:

$^1H$  NMR (500 MHz,  $CDCl_3$ , 25  $^\circ$ C,  $\delta$ ): 7.49–7.42 (m, 4H), 6.65 (t,  $J$  = 56.5 Hz, 1H), 1.79 (dd,  $J$  = 8.0 Hz, 5.5 Hz, 2H), 1.46 (dd,  $J$  = 8.0 Hz, 5.5 Hz, 2H).

$^{13}C$  NMR (125 MHz,  $CDCl_3$ , 25  $^\circ$ C,  $\delta$ ): 137.1, 135.3 (t,  $J$  = 22.6 Hz), 129.6, 128.3, 125.0 (t, 5.4 Hz), 122.9 (t,  $J$  = 6.4 Hz), 122.2, 114.3 (t,  $J$  = 240.1 Hz), 18.5, 13.9.

$^{19}F$  NMR (470 MHz,  $CDCl_3$ , 25  $^\circ$ C,  $\delta$ ): -114.0 (d,  $J$  = 55.9 Hz).

HRMS-FIA( $m/z$ ) calc'd for  $C_{11}H_9F_2NaN$  [ $M+Na$ ] $^+$ : 216.0595; found: 216.0595.

#### 3-Isopropanolyl-difluoromethylbenzene (3d)

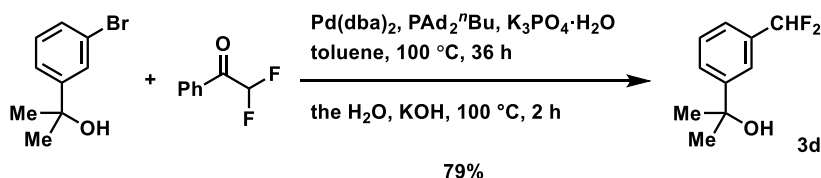

Based on a reported procedure<sup>2</sup>:  $Pd(dba)_2$  (17.3 mg, 30.0  $\mu$ mol, 3.00 mol%),  $PAd_2^nBu$  (14.3 mg, 40.0  $\mu$ mol, 4.00 mol%) and  $K_3PO_4 \cdot H_2O$  (921 mg, 4.00 mmol, 4.00 equiv.) were added to a flame-dried Schlenk tube. The Schlenk tube was evacuated and back-filled with nitrogen (3  $\times$ ). Toluene (5 mL), 2-(3-bromophenyl)propan-2-ol (215 mg, 1.00 mmol, 1.00 equiv.) and 2,2-difluoroacetophenone (264  $\mu$ L, 2.00 mmol, 2.00 equiv.) were added to the mixture. The Schlenk tube was immersed into a pre-heated oil bath at 100  $^\circ$ C. After 36 h, KOH (500 mg, 8.91 mmol, 8.91 equiv.) and  $H_2O$  (250  $\mu$ L) were added to the mixture. After 2 h, the oil bath was removed, and the Schlenk tube was allowed to cool to room temperature. The reaction mixture was filtered through Celite and eluted with EtOAc (3  $\times$  4 mL). The filtrate was evaporated under reduced pressure. Purification by flash silica gel column chromatography (hexanes/EtOAc = 7:1 v/v) afforded 147 mg of the title compound as a yellow liquid (79% yield).

$R_f$  = 0.40 (hexanes/EtOAc = 6:1 v/v).

#### NMR Spectroscopy:

**<sup>1</sup>H NMR** (500 MHz, CDCl<sub>3</sub>, 25 °C, δ): 7.65 (s, 1H), 7.60 (d, *J* = 8.0 Hz, 1H), 7.45–7.38 (m, 2H), 6.65 (t, *J* = 56.5 Hz, 1H), 1.82 (s, 1H), 1.60 (s, 6H).

**<sup>13</sup>C NMR** (125 MHz, CDCl<sub>3</sub>, 25 °C, δ): 150.0, 134.4 (t, *J* = 22.6 Hz), 128.8, 127.0, 124.0 (t, *J* = 5.4 Hz), 121.8 (t, *J* = 6.4 Hz), 115.0 (t, *J* = 239.0 Hz), 72.6, 31.9.

**<sup>19</sup>F NMR** (470 MHz, CDCl<sub>3</sub>, 25 °C, δ): -113.1 (d, *J* = 56.5 Hz).

**HRMS-FIA(m/z)** calc'd for C<sub>10</sub>H<sub>12</sub>F<sub>2</sub>NaO [M+Na]<sup>+</sup>: 209.0748; found: 209.0755.

### 3-Chloro-(5-phenylethynyl)-difluoromethylbenzene (3e)

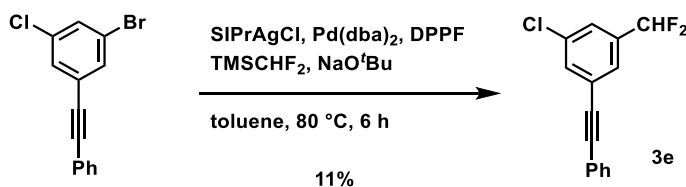

Based on a reported procedure<sup>3</sup>: In a N<sub>2</sub>-filled glove box, aryl bromide **S11** (117 mg, 0.400 mmol, 1.00 equiv), Pd(dba)<sub>2</sub> (16.1 mg, 28.0 μmol, 7.00 mol%), DPPF (31.0 mg, 56.0 μmol, 14.0 mol%), (SiPr)AgCl (42.7 mg, 80.0 μmol, 20 mol%), and NaO<sup>t</sup>Bu (96.1 mg, 1.0 mmol, 2 equiv) were combined in a 20 mL vial. To this vial was added 5.0 mL of anhydrous toluene, followed by trimethyl(difluoromethyl)silane (148.8 mg, 1.2 mmol, 2.4 equiv). The vial was sealed and moved out from the glove box. The mixture was stirred at 80 °C for 6 hours. The dark solution was diluted with H<sub>2</sub>O (12 mL). The mixture was filtered through a short plug of Celite, and washed with DCM (3 × 15 mL). The organic layer was combined, dried over Na<sub>2</sub>SO<sub>4</sub>, and concentrated under vacuum. Purification by flash silica gel column chromatography (hexanes) afforded 12.0 mg of the title compound as a colorless liquid (11% yield).

**R<sub>f</sub>** = 0.23 (hexanes).

### NMR Spectroscopy:

**<sup>1</sup>H NMR** (500 MHz, CDCl<sub>3</sub>, 23 °C, δ): 7.62 (s, 1H), 7.57–7.50 (m, 3H), 7.46 (s, 1H), 7.41–7.32 (m, 3H), 6.61 (t, *J* = 56.1 Hz, 1H).

**<sup>13</sup>C NMR** (125 MHz, CDCl<sub>3</sub>, 23 °C, δ): 136.3 (t, *J* = 23.0 Hz), 135.0, 133.6, 131.9, 129.1, 128.6, 127.1 (t, *J* = 6.3 Hz), 125.9, 125.6 (t, *J* = 6.1 Hz), 122.4, 113.4 (t, *J* = 239.4 Hz), 91.8, 87.1.

**<sup>19</sup>F NMR** (470 MHz, CDCl<sub>3</sub>, 23 °C, δ): -115.1 (d, *J* = 55.9 Hz).

**HRMS-FIA(m/z)** calc'd for C<sub>15</sub>H<sub>10</sub>ClF<sub>2</sub> [M+H]<sup>+</sup>: 263.0434; found: 263.0430.

## 4-Pyrazolyl-difluoromethylbenzene (3f)

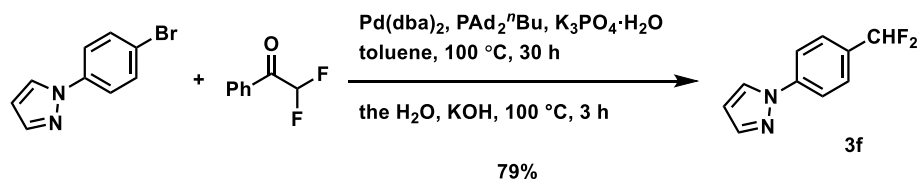

Based on a reported procedure<sup>2</sup>: Pd(dba)<sub>2</sub> (17.3 mg, 30.0 μmol, 3.00 mol%), PAd<sub>2</sub><sup>n</sup>Bu (14.3 mg, 40.0 μmol, 4.00 mol%) and K<sub>3</sub>PO<sub>4</sub>·H<sub>2</sub>O (921 mg, 4.00 mmol, 4.00 equiv.) were added to a flame-dried Schlenk tube. The Schlenk tube was evacuated and back-filled with nitrogen (3 ×). Toluene (5 mL), 1-(4-Bromophenyl)-1*H*-pyrazole (223 mg, 1.00 mmol, 1.00 equiv.) and 2,2-difluoroacetophenone (264 μL, 2.00 mmol, 2.00 equiv.) were added to the mixture. The Schlenk tube was immersed into a pre-heated oil bath at 100 °C. After 30 h, KOH (500 mg, 8.91 mmol, 8.91 equiv.) and H<sub>2</sub>O (250 μL) were added to the mixture. After 3 h, the oil bath was removed, and the Schlenk tube was allowed to cool to room temperature. The reaction mixture was filtered through Celite and eluted with EtOAc (3 × 4 mL). The filtrate was evaporated under reduced pressure. Purification by flash silica gel column chromatography (hexanes/EtOAc = 12:1 v/v) afforded 145 mg of the title compound as a white solid (75% yield).

R<sub>f</sub> = 0.48 (hexanes/EtOAc = 6:1 v/v).

## NMR Spectroscopy:

<sup>1</sup>H NMR (500 MHz, CDCl<sub>3</sub>, 23 °C, δ): 7.97 (d, *J* = 2.5 Hz, 1H), 7.86–7.69 (m, 3H), 7.60 (d, *J* = 8.2 Hz, 2H), 6.69 (t, *J* = 56.4 Hz, 1H), 6.51 (t, *J* = 2.2 Hz, 1H).

<sup>13</sup>C NMR (125 MHz, CDCl<sub>3</sub>, 23 °C, δ): 141.9, 141.8, 132.3 (t, *J* = 22.7 Hz), 127.0 (t, *J* = 6.1 Hz), 126.9, 119.1, 114.4 (td, *J* = 238.7, 3.2 Hz), 108.3.

<sup>19</sup>F NMR (470 MHz, CDCl<sub>3</sub>, 21 °C, δ): -113.4 (d, *J* = 55.9 Hz).

HRMS-FIA(*m/z*) calc'd for C<sub>10</sub>H<sub>9</sub>F<sub>2</sub>N<sub>2</sub> [M+H]<sup>+</sup>: 195.0729; found: 195.0732.

## 3-Morpholino-difluoromethylbenzene (3g)

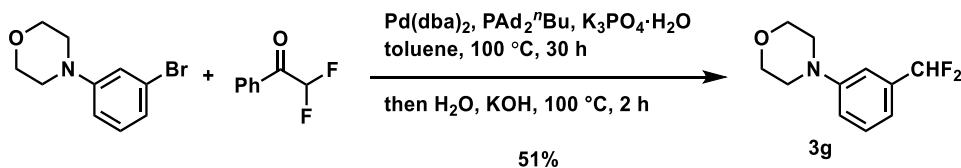

Based on a reported procedure<sup>2</sup>: Pd(dba)<sub>2</sub> (17.3 mg, 30.0 μmol, 3.00 mol%), PAd<sub>2</sub><sup>n</sup>Bu (14.3 mg, 40.0 μmol, 4.00 mol%) and K<sub>3</sub>PO<sub>4</sub>·H<sub>2</sub>O (921 mg, 4.00 mmol, 4.00 equiv.) were added to a flame-dried Schlenk tube.

The Schlenk tube was evacuated and back-filled with nitrogen (3 ×). Toluene (5 mL), 4-(3-bromophenyl)morpholine (242 mg, 1.00 mmol, 1.00 equiv.) and 2,2-difluoroacetophenone (264 μL, 2.00 mmol, 2.00 equiv.) were added to the mixture. The Schlenk tube was immersed into a pre-heated oil bath at

100 °C. After 30 h, KOH (500 mg, 8.91 mmol, 8.91 equiv.) and H<sub>2</sub>O (250 µL) were added to the mixture. After 2 h, the oil bath was removed, and the Schlenk tube was allowed to cool to room temperature. The reaction mixture was filtered through Celite and eluted with EtOAc (3 × 4 mL). The filtrate was evaporated under reduced pressure. Purification by flash silica gel column chromatography (hexanes/EtOAc = 10:1 v/v to 8/1 v/v) afforded 109 mg of the title compound as a yellow liquid (51% yield).

R<sub>f</sub> = 0.45 (hexanes/EtOAc = 6:1 v/v).

#### NMR Spectroscopy:

<sup>1</sup>H NMR (500 MHz, CDCl<sub>3</sub>, 25 °C, δ): 7.35 (t, *J* = 7.5 Hz, 1H), 7.03 (s, 1H), 7.02–6.98 (m, 2H), 6.60 (t, *J* = 57.0 Hz, 1H), 3.87 (t, *J* = 5.0 Hz, 4H), 3.20 (t, *J* = 5.0 Hz, 4H).

<sup>13</sup>C NMR (125 MHz, CDCl<sub>3</sub>, 25 °C, δ): 151.6, 135.4 (t, *J* = 21.4 Hz), 129.7, 117.8, 117.0 (t, *J* = 6.6 Hz), 115.0 (t, *J* = 240.2 Hz), 112.3 (t, *J* = 6.4 Hz), 66.9, 49.1.

<sup>19</sup>F NMR (470 MHz, CDCl<sub>3</sub>, 25 °C, δ): -113.5 (d, *J* = 55.9 Hz).

HRMS-FIA(*m/z*) calc'd for C<sub>11</sub>H<sub>14</sub>F<sub>2</sub>NO<sub>2</sub> [M+H]<sup>+</sup>: 214.1038; found: 214.1047.

#### 2-Difluoromethylfluoren-9-one (3i)

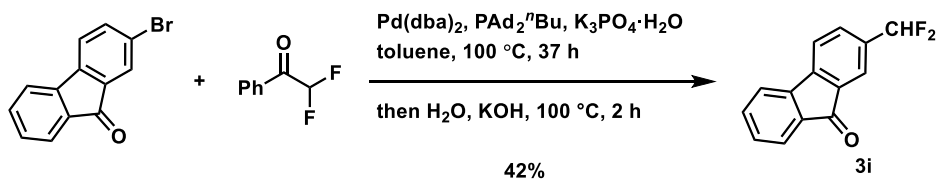

Based on a reported procedure<sup>2</sup>: 2-Bromofluoren-9-one (259 mg, 1.00 mmol, 1.00 equiv.), Pd(dba)<sub>2</sub> (17.3 mg, 30.0 µmol, 3.00 mol%), PAd<sub>2</sub><sup>n</sup>Bu (14.3 mg, 40.0 µmol, 4.00 mol%) and K<sub>3</sub>PO<sub>4</sub>·H<sub>2</sub>O (921 mg, 4.00 mmol, 4.00 equiv.) were added to a flame-dried Schlenk tube. The Schlenk tube was evacuated and back-filled with nitrogen (3 ×). Toluene (5 mL) and 2,2-difluoroacetophenone (264 µL, 2.00 mmol, 2.00 equiv.) were added to the mixture. The Schlenk tube was immersed into a pre-heated oil bath at 100 °C. After 37 h, KOH (500 mg, 8.91 mmol, 8.91 equiv.) and H<sub>2</sub>O (250 µL) were added to the mixture. After 2 h, the oil bath was removed, and the Schlenk tube was allowed to cool to room temperature. The reaction mixture was filtered through Celite and eluted with EtOAc (3 × 4 mL). The filtrate was evaporated under reduced pressure. Purification by flash silica gel column chromatography (hexanes/EtOAc = 40:1 v/v) afforded 104 mg of the title compound as a yellow solid (42% yield).

R<sub>f</sub> = 0.20 (hexanes/EtOAc = 40:1 v/v).

#### NMR Spectroscopy:

<sup>1</sup>H NMR (500 MHz, CDCl<sub>3</sub>, 25 °C, δ): 7.78 (s, 1H), 7.68 (d, *J* = 7.5 Hz, 1H), 7.63 (d, *J* = 8.0 Hz, 1H), 7.59 (d, *J* = 7.5 Hz, 1H), 7.56 (d, *J* = 7.5 Hz, 1H), 7.52 (t, *J* = 8.0 Hz, 1H), 7.35 (t, *J* = 7.5 Hz, 1H), 6.65 (t, *J* = 56.0 Hz, 1H).

**<sup>13</sup>C NMR** (125 MHz, CDCl<sub>3</sub>, 25 °C, δ): 190.3, 144.2, 141.1, 133.0 (t, *J* = 22.6 Hz), 132.7, 132.2, 132.0, 129.6 (t, *J* = 6.6 Hz), 127.5, 122.3, 119.3 (t, *J* = 5.4 Hz), 118.6, 118.2, 111.7 (t, *J* = 240.0 Hz).

**<sup>19</sup>F NMR** (470 MHz, CDCl<sub>3</sub>, 25 °C, δ): -114.1 (d, *J* = 56.5 Hz).

**HRMS-FIA(m/z)** calc'd for C<sub>14</sub>H<sub>8</sub>F<sub>2</sub>NaO [M+Na]<sup>+</sup>: 253.0435; found: 253.0433.

### 2-Chlorophenyl-(4-difluoromethyl)phenyl-methanone (3l)

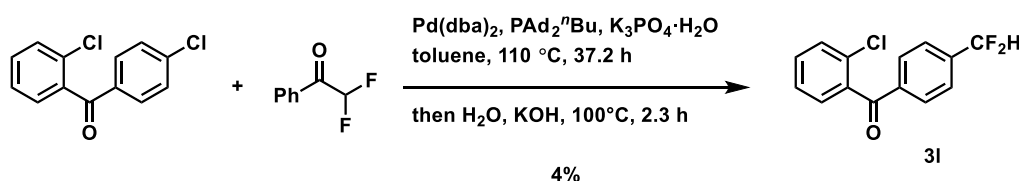

Based on a reported procedure<sup>2</sup>: 2-Chlorophenyl-4-chlorophenyl-methanone (243 mg, 1.00 mmol, 1.00 equiv.), Pd(dba)<sub>2</sub> (17.3 mg, 30.0 μmol, 3.00 mol%), PAd<sub>2</sub><sup>n</sup>Bu (14.3 mg, 40.0 μmol, 4.00 mol%) and K<sub>3</sub>PO<sub>4</sub>·H<sub>2</sub>O (921 mg, 4.00 mmol, 4.00 equiv.) were added to a flame-dried Schlenk tube. The Schlenk tube was evacuated and back-filled with nitrogen (3 ×). Toluene (5 mL) and 2,2-difluoroacetophenone (264 μL, 1.20 mmol, 1.20 equiv.) were added to the mixture. The Schlenk tube was immersed into a pre-heated oil bath at 110 °C. After 37.2 h, KOH (500 mg, 8.91 mmol, 8.91 equiv.) and H<sub>2</sub>O (250 μL) were added to the mixture and the temperature of the oil bath was decreased to 100 °C. After 2.3 h, the oil bath was removed, and the Schlenk tube was allowed to cool to room temperature. The reaction mixture was filtered through Celite and eluted with EtOAc (3 × 4 mL). The filtrate was evaporated under reduced pressure. Purification by flash silica gel column chromatography (hexanes/DCM = 3:1 v/v) afforded 11.0 mg of the title compound as a colorless liquid (4% yield).

**R<sub>f</sub>** = 0.50 (hexanes/EtOAc = 6:1 v/v).

### NMR Spectroscopy:

**<sup>1</sup>H NMR** (500 MHz, CDCl<sub>3</sub>, 24 °C, δ): 7.89 (d, *J* = 7.9 Hz, 2H), 7.61 (d, *J* = 8.1 Hz, 2H), 7.51–7.43 (m, 2H), 7.43–7.36 (m, 2H), 6.70 (t, *J* = 56.0 Hz, 1H).

**<sup>13</sup>C NMR** (125 MHz, CDCl<sub>3</sub>, 25 °C, δ): 194.7, 139.1 (t, *J* = 22.4 Hz), 138.6, 138.2, 131.7, 131.5, 130.4, 130.4, 129.4, 127.0, 126.1 (t, *J* = 6.1 Hz), 114.0 (t, *J* = 240.1 Hz).

**<sup>19</sup>F NMR** (470 MHz, CDCl<sub>3</sub>, 24 °C, δ): -115.5 (d, *J* = 55.9 Hz).

**HRMS-FIA(m/z)** calc'd for C<sub>14</sub>H<sub>9</sub>ClF<sub>2</sub>NaO [M+Na]<sup>+</sup>: 289.0202; found: 289.0207.

### 5-Difluoromethyl-2-methylbenzo[d]thiazole (3n)

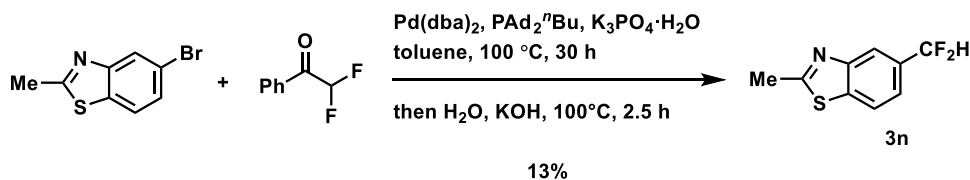

Based on a reported procedure<sup>2</sup>: 5-Bromo-2-methylbenzothiazole (228 mg, 1.00 mmol, 1.00 equiv.), Pd(dba)<sub>2</sub> (17.3 mg, 30.0 μmol, 3.00 mol%), PAd<sub>2</sub><sup>n</sup>Bu (14.3 mg, 40.0 μmol, 4.00 mol%) and K<sub>3</sub>PO<sub>4</sub>·H<sub>2</sub>O (921 mg, 4.00 mmol, 4.00 equiv.) were added to a flame-dried Schlenk tube. The Schlenk tube was evacuated and back-filled with nitrogen (3 ×). Toluene (5 mL) and 2,2-difluoroacetophenone (264 μL, 2.00 mmol, 2.00 equiv.) were added to the mixture. The Schlenk tube was immersed into a pre-heated oil bath at 100 °C. After 30 h 10 min, KOH (500 mg, 8.91 mmol, 8.91 equiv.) and H<sub>2</sub>O (250 μL) were added to the mixture. After 2.5 h, the oil bath was removed, and the Schlenk tube was allowed to cool to room temperature. The reaction mixture was filtered through Celite and eluted with EtOAc (3 × 4 mL). The filtrate was evaporated under reduced pressure. Purification by flash silica gel column chromatography (cyclohexane/EtOAc = 6:1 v/v) afforded 25 mg of the title compound as an off-white solid (13% yield).

R<sub>f</sub> = 0.22 (cyclohexane/EtOAc = 5:1 v/v).

#### NMR Spectroscopy:

<sup>1</sup>H NMR (500 MHz, CDCl<sub>3</sub>, 23 °C, δ): 8.07 (s, 1H), 7.91 (d, *J* = 8.3 Hz, 1H), 7.51 (d, *J* = 8.3 Hz, 1H), 6.78 (t, *J* = 56.4 Hz, 1H), 2.86 (s, 3H).

<sup>13</sup>C NMR (125 MHz, CDCl<sub>3</sub>, 23 °C, δ): 168.8, 153.3, 138.2, 132.7 (t, *J* = 22.6 Hz), 122.1, 121.7 (t, *J* = 5.6 Hz), 120.0 (t, *J* = 6.8 Hz), 114.8 (t, *J* = 239.3 Hz), 20.4.

<sup>19</sup>F NMR (470 MHz, CDCl<sub>3</sub>, 25 °C, δ): -112.3 (d, *J* = 56.4 Hz).

HRMS-FIA(m/z) calc'd for C<sub>9</sub>H<sub>8</sub>F<sub>2</sub>NS [M+H]<sup>+</sup>: 200.0340; found: 200.0349.

#### 3-Difluoromethylquinoline (3p)

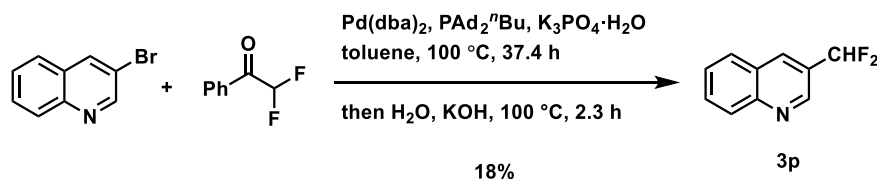

Based on a reported procedure<sup>2</sup>: Pd(dba)<sub>2</sub> (17.3 mg, 30.0 μmol, 3.00 mol%), PAd<sub>2</sub><sup>n</sup>Bu (14.3 mg, 40.0 μmol, 4.00 mol%) and K<sub>3</sub>PO<sub>4</sub>·H<sub>2</sub>O (921 mg, 4.00 mmol, 4.00 equiv.) were added to a flame-dried Schlenk tube. The Schlenk tube was evacuated and back-filled with nitrogen (3 ×). Toluene (5 mL), 3-bromoquinoline (208 mg, 1.00 mmol, 1.00 equiv.) and 2,2-difluoroacetophenone (264 μL, 2.00 mmol, 2.00 equiv.) were added to the mixture. The Schlenk tube was immersed into a pre-heated oil bath at 100 °C. After 37.4 h, KOH (500 mg, 8.91 mmol, 8.91 equiv.) and H<sub>2</sub>O (250 μL) were added to the mixture. After 2.3 h, the oil bath was removed, and the Schlenk tube was allowed to cool to room temperature. The reaction mixture was filtered through Celite and eluted with EtOAc (3 × 4 mL). The filtrate was evaporated under reduced pressure. Purification by flash silica gel column chromatography (hexanes/EtOAc = 6:1 v/v) afforded 31.9 mg of the title compound as a yellow liquid (18% yield).

R<sub>f</sub> = 0.35 (hexanes/EtOAc = 6:1 v/v).



**NMR Spectroscopy:**

**<sup>1</sup>H NMR** (500 MHz, CDCl<sub>3</sub>, 23 °C, δ): 9.05 (s, 1H), 8.32 (s, 1H), 8.18 (d, *J* = 8.5 Hz, 1H), 7.91 (d, *J* = 7.8 Hz, 1H), 7.83 (t, *J* = 8.0 Hz, 1H), 7.64 (t, *J* = 7.3 Hz, 1H), 6.90 (t, *J* = 55.9 Hz, 1H).

**<sup>13</sup>C NMR** (125 MHz, CDCl<sub>3</sub>, 23 °C, δ): 149.1, 147.2, 134.2 (t, *J* = 6.7 Hz), 131.3, 129.6, 128.5, 127.8, 127.3 (t, *J* = 25.0 Hz), 127.0, 113.8 (t, *J* = 240.1 Hz).

**<sup>19</sup>F NMR** (470 MHz, CDCl<sub>3</sub>, 23 °C, δ): -114.6 (d, *J* = 55.9 Hz).

**HRMS-FIA(m/z)** calc'd for C<sub>10</sub>H<sub>8</sub>F<sub>2</sub>N [M+H]<sup>+</sup>: 180.0620; found: 180.0628.

**4-Morpholinomethyl-difluoromethylbenzene (3q)**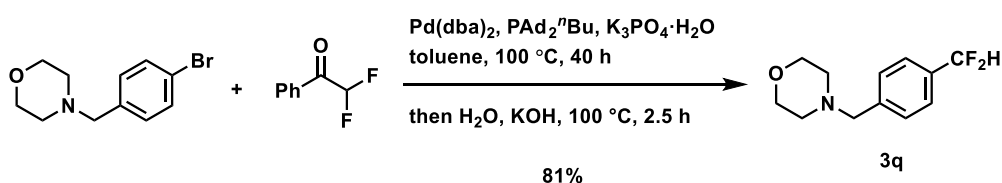

Based on a reported procedure<sup>2</sup>: 4-(4-Bromobenzyl)morpholine (256 mg, 1.00 mmol, 1.00 equiv.), Pd(dba)<sub>2</sub> (17.3 mg, 30.0 μmol, 3.00 mol%), PAd<sub>2</sub><sup>n</sup>Bu (14.3 mg, 40.0 μmol, 4.00 mol%) and K<sub>3</sub>PO<sub>4</sub>·H<sub>2</sub>O (921 mg, 4.00 mmol, 4.00 equiv.) were added to a flame-dried Schlenk tube. The Schlenk tube was evacuated and back-filled with nitrogen (3 ×). Toluene (5 mL) and 2,2-difluoroacetophenone (264 μL, 2.00 mmol, 2.00 equiv.) were added to the mixture. The Schlenk tube was immersed into a pre-heated oil bath at 100 °C. After 40 h, KOH (500 mg, 8.91 mmol, 8.91 equiv.) and H<sub>2</sub>O (250 μL) were added to the mixture. After 2.5 h, the oil bath was removed, and the Schlenk tube was allowed to cool to room temperature. The reaction mixture was filtered through Celite and eluted with EtOAc (3 × 4 mL). The filtrate was evaporated under reduced pressure. Purification by flash silica gel column chromatography (hexanes/EtOAc = 3:1 v/v, 1% Et<sub>3</sub>N) afforded 185 mg of the title compound as a yellow liquid (81% yield).

**R<sub>f</sub>** = 0.33 (hexanes/EtOAc = 2:1 v/v, 1% Et<sub>3</sub>N).

**NMR Spectroscopy:**

**<sup>1</sup>H NMR** (500 MHz, CDCl<sub>3</sub>, 25 °C, δ): 7.46 (d, *J* = 8.5 Hz, 2H), 7.42 (d, *J* = 8.5 Hz, 2H), 6.63 (t, *J* = 57.0 Hz, 1H), 3.71 (t, *J* = 4.5 Hz, 4H), 3.53 (s, 2H), 2.44 (t, *J* = 4.5 Hz, 4H).

**<sup>13</sup>C NMR** (125 MHz, CDCl<sub>3</sub>, 25 °C, δ): 141.0, 133.4 (t, *J* = 21.5 Hz), 129.4, 125.6 (t, *J* = 5.3 Hz), 114.8 (t, *J* = 239.1 Hz), 67.1, 63.1, 53.7.

**<sup>19</sup>F NMR** (470 MHz, CDCl<sub>3</sub>, 24 °C, δ): -113.1 (d, *J* = 57.3 Hz).

**HRMS-FIA(m/z)** calc'd for C<sub>12</sub>H<sub>16</sub>F<sub>2</sub>NO [M+H]<sup>+</sup>: 228.1192; found: 228.1204.

## Difluoromethyl-fenofibrate

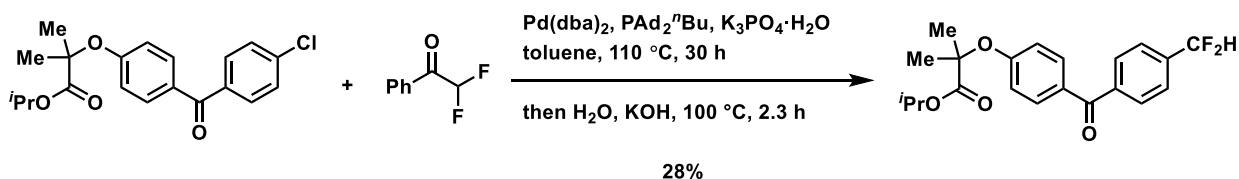

Based on a reported procedure<sup>2</sup>: Fenofibrate (361 mg, 1.00 mmol, 1.00 equiv.), Pd(dba)<sub>2</sub> (17.3 mg, 30.0 μmol, 3.00 mol%), PAd<sub>2</sub><sup>n</sup>Bu (14.3 mg, 40.0 μmol, 4.00 mol%) and K<sub>3</sub>PO<sub>4</sub>·H<sub>2</sub>O (921 mg, 4.00 mmol, 4.00 equiv.) were added to a flame-dried Schlenk tube. The Schlenk tube was evacuated and back-filled with nitrogen (3 ×). Toluene (5 mL) and 2,2-difluoroacetophenone (264 μL, 2.00 mmol, 2.00 equiv.) were added to the mixture. The Schlenk tube was immersed into a pre-heated oil bath at 110 °C. After 30 h, KOH (500 mg, 8.91 mmol, 8.91 equiv.) and H<sub>2</sub>O (250 μL) were added to the mixture and the temperature of the oil bath was decreased to 100 °C. After 2.3 h, the oil bath was removed, and the Schlenk tube was allowed to cool to room temperature. The reaction mixture was filtered through Celite and eluted with EtOAc (3 × 4 mL). The filtrate was evaporated under reduced pressure. Purification by flash silica gel column chromatography (hexanes/EtOAc = 15:1 v/v) afforded 104 mg of the title compound as an off-white solid (28% yield).

R<sub>f</sub> = 0.40 (hexanes/EtOAc = 6:1 v/v).

## NMR Spectroscopy:

<sup>1</sup>H NMR (500 MHz, CDCl<sub>3</sub>, 25 °C, δ): 7.81 (d, *J* = 7.8 Hz, 2H), 7.76 (d, *J* = 7.8 Hz, 2H), 7.62 (d, *J* = 8.0 Hz, 2H), 6.86 (d, *J* = 8.5 Hz, 2H), 6.72 (t, *J* = 56.5 Hz, 1H), 5.09 (sep, *J* = 6.5 Hz, 1H), 1.66 (s, 6H), 1.20 (d, *J* = 6.5 Hz, 6H).

<sup>13</sup>C NMR (125 MHz, CDCl<sub>3</sub>, 25 °C, δ): 194.7, 173.2, 160.0, 140.5, 137.5 (t, *J* = 22.6 Hz), 132.2, 130.2, 130.0, 125.6 (t, *J* = 5.4 Hz), 117.4, 114.2 (t, *J* = 240.0 Hz), 79.6, 69.5, 25.5, 21.6.

<sup>19</sup>F NMR (470 MHz, CDCl<sub>3</sub>, 24 °C, δ): -114.8 (d, *J* = 56.0 Hz).

HRMS-FIA(*m/z*) calc'd for C<sub>21</sub>H<sub>22</sub>F<sub>2</sub>NaO<sub>4</sub> [M+Na]<sup>+</sup>: 399.1378; found: 399.1380.

## Difluoromethyl-DAA1106

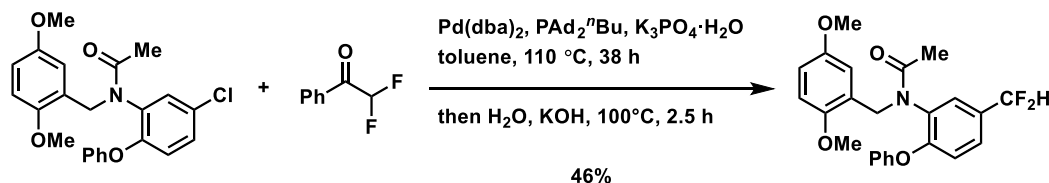

Based on a reported procedure<sup>2</sup>: Aryl chloride (412 mg, 1.00 mmol, 1.00 equiv.), Pd(dba)<sub>2</sub> (17.3 mg, 30.0 μmol, 3.00 mol%), PAd<sub>2</sub><sup>n</sup>Bu (14.3 mg, 40.0 μmol, 4.00 mol%) and K<sub>3</sub>PO<sub>4</sub>·H<sub>2</sub>O (921 mg, 4.00 mmol, 4.00 equiv.) were added to a flame-dried Schlenk tube. The Schlenk tube was evacuated and back-filled with nitrogen (3 ×). Toluene (5 mL) and 2,2-difluoroacetophenone (264 μL, 1.20 mmol, 1.20 equiv.) were added to the mixture. The Schlenk tube was immersed into a pre-heated oil bath at 110 °C. After 38 h, KOH (500 mg,

8.91 mmol, 8.91 equiv.) and H<sub>2</sub>O (250  $\mu$ L) were added to the mixture and the temperature of the oil bath was decreased to 100°C. After 2.5 h, the oil bath was removed, and the Schlenk tube was allowed to cool to room temperature. The reaction mixture was filtered through Celite and eluted with EtOAc (3  $\times$  4 mL). The filtrate was evaporated under reduced pressure. Purification by flash silica gel column chromatography (hexanes/EtOAc = 4:1 v/v) afforded 198 mg of the title compound as a yellow liquid (46% yield).

R<sub>f</sub> = 0.30 (hexanes/EtOAc = 3:1 v/v).

#### NMR Spectroscopy:

**<sup>1</sup>H NMR** (500 MHz, CDCl<sub>3</sub>, 55 °C,  $\delta$ ): 7.35 (t, *J* = 7.9 Hz, 2H), 7.30 (d, *J* = 8.6 Hz, 1H), 7.19 (d, *J* = 7.9 Hz, 2H), 6.99 (d, *J* = 3.1 Hz, 1H), 6.90 (d, *J* = 8.0 Hz, 2H), 6.85 (d, *J* = 8.5 Hz, 1H), 6.73 (dd, *J* = 8.9, 3.1 Hz, 1H), 6.65 (d, *J* = 8.8 Hz, 1H), 6.50 (t, *J* = 56.5 Hz, 1H), 5.13 (d, *J* = 14.2 Hz, 1H), 4.77 (d, *J* = 14.4 Hz, 1H), 3.67 (s, 3H), 3.50 (s, 3H), 1.96 (s, 3H).

**<sup>13</sup>C NMR** (125 MHz, CDCl<sub>3</sub>, 23 °C,  $\delta$ ): 170.9, 156.0, 155.2, 153.6, 151.9, 133.1, 130.2, 129.0 (t, *J* = 23.3 Hz), 128.2, 126.4 (t, *J* = 5.9 Hz), 126.2, 124.9, 120.0, 117.6, 116.8, 114.0 (d, *J* = 238.5 Hz), 113.9, 111.3, 55.8, 55.7, 46.1, 22.4.

**<sup>19</sup>F NMR** (470 MHz, CDCl<sub>3</sub>, 25 °C, compound exists as a 1:1 mixture of rotamers,  $\delta$ ): -112.3 (d, *J* = 55.9 Hz), -112.4 (d, *J* = 55.9 Hz).

**HRMS-FIA(m/z)** calc'd for C<sub>24</sub>H<sub>24</sub>F<sub>2</sub>NO<sub>4</sub> [M+H]<sup>+</sup>: 428.1668; found: 428.1682.

#### Difluoromethyl-estrone

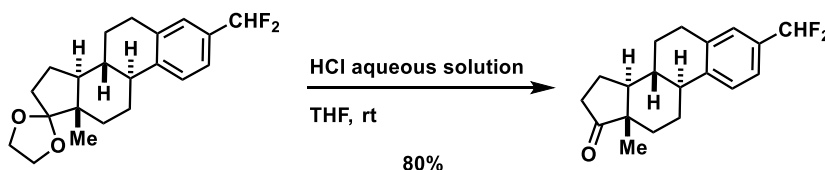

To a solution of difluoromethyl-estrone-ketal<sup>3</sup> (60.0 mg, 0.172 mmol) in THF (2.5 mL) was added HCl aqueous solution (2 M, 1 mL). The resulting mixture was stirred at room temperature. After 2.5 h, the reaction mixture was poured into saturated NaHCO<sub>3</sub> aqueous solution (6 mL) and extracted with DCM (3  $\times$  5 mL). The combined organic layer was dried with MgSO<sub>4</sub>. After the solvent was removed in vacuo, purification by flash silica gel column chromatography (hexanes/EtOAc = 12:1 v/v) afforded 42.0 mg of the title compound as a white solid (80% yield).

R<sub>f</sub> = 0.27 (hexanes/EtOAc = 10:1 v/v).

#### NMR Spectroscopy:

**<sup>1</sup>H NMR** (500 MHz, CDCl<sub>3</sub>, 23 °C,  $\delta$ ): 7.38 (d, *J* = 8.1 Hz, 1H), 7.28 (d, *J* = 8.1 Hz, 1H), 7.24 (s, 1H), 6.59 (t, *J* = 56.6 Hz, 1H), 3.01–2.89 (m, 2H), 2.52 (dd, *J* = 19.0, 8.5 Hz, 1H), 2.47–2.40 (m, 1H), 2.39–2.28 (m, 1H), 2.21–2.01 (m, 3H), 2.01–1.94 (m, 1H), 1.70–1.44 (m, 6H), 0.92 (s, 3H).

**<sup>13</sup>C NMR** (125 MHz, CDCl<sub>3</sub>, 25 °C,  $\delta$ ): 220.7, 142.7, 137.2, 132.0 (t, *J* = 22.4 Hz), 126.2 (t, *J* = 5.9 Hz),

125.9, 123.0, 115.0 (t,  $J = 238.2$  Hz), 50.6, 48.0, 44.6, 38.0, 35.9, 31.7, 29.4, 26.4, 25.8, 21.7, 13.9.

$^{19}\text{F}$  NMR (470 MHz,  $\text{CDCl}_3$ , 25 °C,  $\delta$ ): -112.9 (dd,  $J = 56.9$  Hz, 8.9 Hz).

HRMS-FIA( $m/z$ ) calc'd for  $\text{C}_{19}\text{H}_{22}\text{F}_2\text{NaO}$  [ $\text{M}+\text{Na}$ ] $^+$ : 327.1531; found: 327.1521.

### Difluoromethyl-Claritin

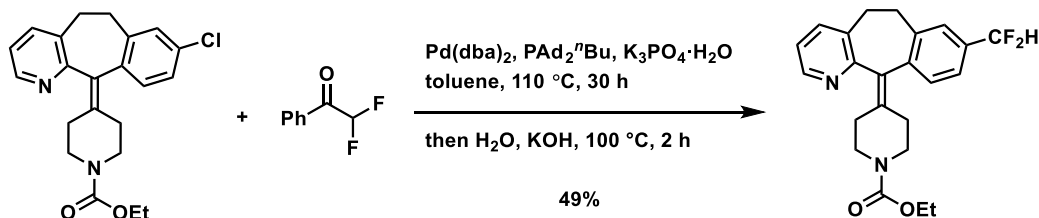

Based on a reported procedure<sup>2</sup>: Claritin (383 mg, 1.00 mmol, 1.00 equiv.),  $\text{Pd}(\text{dba})_2$  (17.3 mg, 30.0  $\mu\text{mol}$ , 3.00 mol%),  $\text{PAd}_2^n\text{Bu}$  (14.3 mg, 40.0  $\mu\text{mol}$ , 4.00 mol%) and  $\text{K}_3\text{PO}_4 \cdot \text{H}_2\text{O}$  (921 mg, 4.00 mmol, 4.00 equiv.) were added to a flame-dried Schlenk tube. The Schlenk tube was evacuated and back-filled with nitrogen (3  $\times$ ). Toluene (5 mL) and 2,2-difluoroacetophenone (264  $\mu\text{L}$ , 2.00 mmol, 2.00 equiv.) were added to the mixture. The Schlenk tube was immersed into a pre-heated oil bath at 110 °C. After 30 h,  $\text{KOH}$  (500 mg, 8.91 mmol, 8.91 equiv.) and  $\text{H}_2\text{O}$  (250  $\mu\text{L}$ ) were added to the mixture and the temperature of the oil bath was decreased to 100 °C. After 2 h, the oil bath was removed, and the Schlenk tube was allowed to cool to room temperature. The reaction mixture was filtered through Celite and eluted with  $\text{EtOAc}$  (3  $\times$  4 mL). The filtrate was evaporated under reduced pressure. Purification by flash silica gel column chromatography (hexanes/dioxane/dichloromethane = 6:1:1 v/v/v) afforded 195 mg of the title compound as an orange solid (49% yield).

$R_f = 0.33$  (hexanes/ $\text{EtOAc}$  = 1:2 v/v).

### NMR Spectroscopy:

$^1\text{H}$  NMR (500 MHz,  $\text{CDCl}_3$ , 25 °C,  $\delta$ ): 8.40 (d,  $J = 4.5$  Hz, 1H), 7.44 (d,  $J = 7.5$  Hz, 1H), 7.34–7.26 (m, 3H), 7.11–7.08 (m, 1H), 6.70 (t,  $J = 56.5$  Hz, 1H), 4.12 (q,  $J = 7.0$  Hz, 2H), 3.81 (brs, 2H), 3.50–3.43 (m, 1H), 3.41–3.35 (m, 1H), 3.18–3.12 (m, 2H), 2.91–2.84 (m, 2H), 2.53–2.47 (m, 1H), 2.40–2.30 (m, 3H), 1.25 (t,  $J = 7.0$  Hz, 3H).

$^{13}\text{C}$  NMR (125 MHz,  $\text{CDCl}_3$ , 25 °C,  $\delta$ ): 156.9, 155.6, 146.9, 142.1, 138.5, 137.8, 137.7, 134.7, 133.5 (t,  $J = 21.4$  Hz), 133.5, 129.7, 126.2 (t,  $J = 5.3$  Hz), 123.5 (t,  $J = 5.4$  Hz), 122.4, 114.8 (t,  $J = 239.0$  Hz), 61.4, 44.9, 44.9, 32.0, 31.7, 30.9, 30.6, 14.8.

$^{19}\text{F}$  NMR (470 MHz,  $\text{CDCl}_3$ , 24 °C,  $\delta$ ): -113.2 (d,  $J = 56.0$  Hz).

HRMS-FIA( $m/z$ ) calc'd for  $\text{C}_{23}\text{H}_{25}\text{F}_2\text{N}_2\text{O}_2$  [ $\text{M}+\text{H}$ ] $^+$ : 399.1879; found: 399.1887.

Difluoromethyl-*N*-Boc-Fluoxetine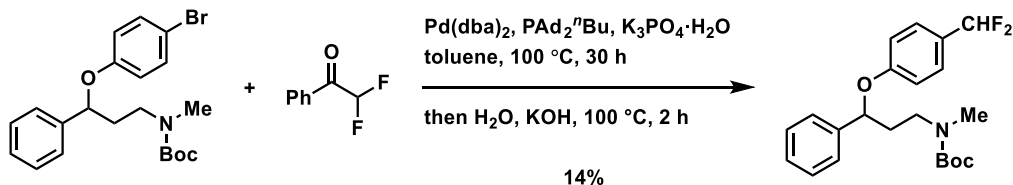

Based on a reported procedure<sup>2</sup>: Aryl bromide (420 mg, 1.00 mmol, 1.00 equiv.), Pd(dba)<sub>2</sub> (17.3 mg, 30.0 μmol, 3.00 mol%), PAd<sub>2</sub><sup>t</sup>Bu (14.3 mg, 40.0 μmol, 4.00 mol%) and K<sub>3</sub>PO<sub>4</sub>·H<sub>2</sub>O (921 mg, 4.00 mmol, 4.00 equiv.) were added to a flame-dried Schlenk tube. The Schlenk tube was evacuated and back-filled with nitrogen (3 ×). Toluene (5 mL) and 2,2-difluoroacetophenone (264 μL, 2.00 mmol, 2.00 equiv.) were added to the mixture. The Schlenk tube was immersed into a pre-heated oil bath at 100 °C. After 30 h, KOH (500 mg, 8.91 mmol, 8.91 equiv.) and H<sub>2</sub>O (250 μL) were added to the mixture. After 2 h, the oil bath was removed, and the Schlenk tube was allowed to cool to room temperature. The reaction mixture was filtered through Celite and eluted with EtOAc (3 × 4 mL). The filtrate was evaporated under reduced pressure. Purification by flash silica gel column chromatography (hexanes/EtOAc = 4:1 to 3:1 v/v) afforded 54.3 mg of the title compound as a yellow liquid (14% yield).

R<sub>f</sub> = 0.30 (hexanes/EtOAc = 4:1 v/v).

## NMR Spectroscopy:

<sup>1</sup>H NMR (500 MHz, CDCl<sub>3</sub>, 50 °C, δ): 7.29–7.23 (m, 5H), 7.21–7.17 (m, 2H), 6.82 (d, *J* = 8.4 Hz, 2H), 6.45 (t, *J* = 56.8 Hz, 1H), 5.10 (dd, *J* = 8.6, 4.2 Hz, 1H), 3.50–3.20 (m, 2H), 2.78 (s, 3H), 2.19–2.07 (m, 1H), 2.07–1.98 (m, 1H), 1.34 (s, 9H).

<sup>13</sup>C NMR (125 MHz, CDCl<sub>3</sub>, 50 °C, δ): 160.1, 155.9, 141.3, 129.0, 128.0, 127.1 (t, *J* = 6.0 Hz), 125.9, 116.1, 115.0 (t, *J* = 237.1 Hz), 80.0, 78.3, 46.0, 37.2, 34.7, 28.6.

<sup>19</sup>F NMR (470 MHz, CDCl<sub>3</sub>, 21 °C, δ): -111.5 (d, *J* = 57.3 Hz).

HRMS-FIA(*m/z*) calc'd for C<sub>22</sub>H<sub>27</sub>F<sub>2</sub>NaNO<sub>3</sub> [M+Na]<sup>+</sup>: 414.1851; found: 414.1859.

## Difluoromethyl-SC-58125

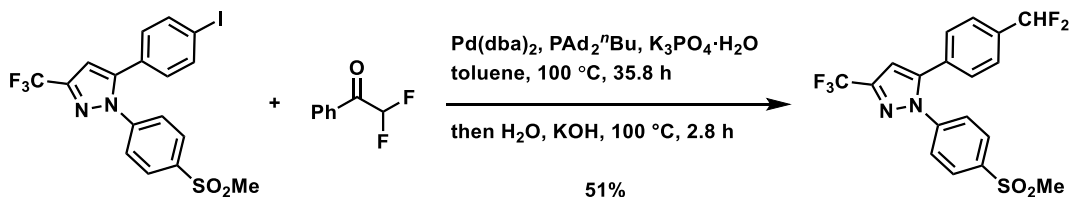

Based on a reported procedure<sup>2</sup>: Aryl iodide (492 mg, 1.00 mmol, 1.00 equiv.), Pd(dba)<sub>2</sub> (17.3 mg, 30.0 μmol, 3.00 mol%), PAd<sub>2</sub><sup>t</sup>Bu (14.3 mg, 40.0 μmol, 4.00 mol%) and K<sub>3</sub>PO<sub>4</sub>·H<sub>2</sub>O (921 mg, 4.00 mmol, 4.00 equiv.) were added to a flame-dried Schlenk tube. The Schlenk tube was evacuated and back-filled with nitrogen (3 ×). Toluene (5 mL) and 2,2-difluoroacetophenone (264 μL, 2.00 mmol, 2.00 equiv.) were added to the

mixture. The Schlenk tube was immersed into a pre-heated oil bath at 100 °C. After 35.8 h, KOH (500 mg, 8.91 mmol, 8.91 equiv.) and H<sub>2</sub>O (250 µL) were added to the mixture. After 2.8 h, the oil bath was removed, and the Schlenk tube was allowed to cool to room temperature. The reaction mixture was filtered through Celite and eluted with EtOAc (3 × 4 mL). The filtrate was evaporated under reduced pressure. Purification by flash silica gel column chromatography (hexanes/EtOAc = 7:2 v/v) afforded 214 mg of the title compound as a white-orange solid (51% yield).

R<sub>f</sub> = 0.37 (hexanes/EtOAc = 2:1 v/v).

#### NMR Spectroscopy:

<sup>1</sup>H NMR (500 MHz, CDCl<sub>3</sub>, 25 °C, δ): 7.96 (d, *J* = 8.5 Hz, 2H), 7.58–7.49 (m, 4H), 7.34 (d, *J* = 7.9 Hz, 2H), 6.83 (s, 1H), 6.67 (t, *J* = 56.2 Hz, 1H), 3.25–2.86 (m, 3H).

<sup>13</sup>C NMR (125 MHz, CDCl<sub>3</sub>, 23 °C, δ): 144.6 (q, *J* = 38.7 Hz), 144.2, 143.2, 140.4, 135.7 (t, *J* = 22.6 Hz), 131.0, 129.3, 128.8, 126.6 (t, *J* = 6.0 Hz), 125.9, 121.0 (q, *J* = 269.2 Hz), 114.0 (t, *J* = 239.5 Hz), 107.4, 44.6.

<sup>19</sup>F NMR (470 MHz, CDCl<sub>3</sub>, 25 °C, δ): –65.5, –114.8 (d, *J* = 56.9 Hz).

HRMS-FIA(*m/z*) calc'd for C<sub>18</sub>H<sub>13</sub>F<sub>5</sub>NaN<sub>2</sub>O<sub>2</sub>S [M+Na]<sup>+</sup>: 439.0510; found: 439.0498.

#### Hydroquinidine 4-difluoromethylbenzoate

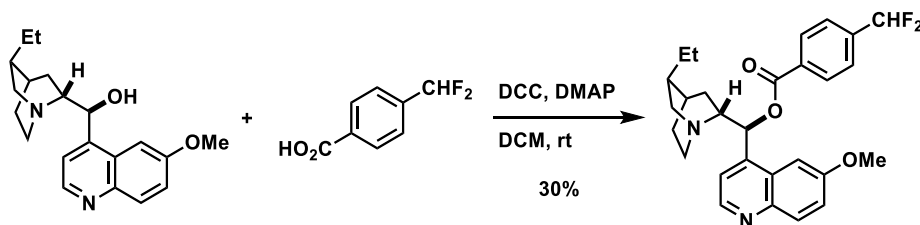

Hydroquinidine (326 mg, 1.00 mmol, 1.00 equiv.), 2-(difluoromethyl)benzoic acid (189 mg, 1.10 mmol, 1.10 equiv.) were dissolved in dry DCM (5 mL). DCC (227 mg, 1.10 mmol, 1.10 mol) and DMAP (12.2 mg, 0.10 mmol, 0.01 equiv.) were added. The reaction mixture was stirred at room temperature for 16 h. Then the suspension was filtered through Celite and eluted with DCM (2 × 4 mL). The filtrate was evaporated under reduced pressure. Purification by flash silica gel column chromatography (hexanes/EtOAc/DCM/Et<sub>3</sub>N = 4:1:1:1 v/v/v/v) afforde 144 mg of the title compound as a white solid (30% yield).

R<sub>f</sub> = 0.60 (hexanes/EtOAc/DCM/Et<sub>3</sub>N = 2:1:1:1 v/v/v/v).

#### NMR Spectroscopy:

<sup>1</sup>H NMR (500 MHz, CDCl<sub>3</sub>, 25°C, δ): 8.73 (d, *J* = 4.6 Hz, 1H), 8.20 (d, *J* = 8.1 Hz, 2H), 8.03 (d, *J* = 9.2 Hz, 1H), 7.64 (d, *J* = 8.1 Hz, 2H), 7.59 (brs, 1H), 7.47–7.36 (m, 2H), 7.01 (s, 1H), 6.72 (t, *J* = 56.0 Hz, 1H), 4.04 (s, 3H), 3.47 (q, *J* = 8.8 Hz, 1H), 3.19–2.71 (m, 4H), 2.15–1.95 (m, 1H), 1.85 (s, 1H), 1.74–1.49 (m, 6H), 0.93 (t, *J* = 7.1 Hz, 3H).

**<sup>13</sup>C NMR** (125 MHz, CDCl<sub>3</sub>, 25°C, δ): 164.56, 158.4, 147.4, 144.9, 143.2, 139.2 (t, *J* = 22.5 Hz), 132.00, 131.95, 130.2, 127.0, 126.1 (t, *J* = 6.0 Hz), 122.4, 118.4, 113.9 (t, *J* = 240.4 Hz), 101.4, 74.0, 59.5, 56.2, 50.7, 50.0, 37.0, 26.6, 26.1, 25.45, 23.0, 11.9.

**<sup>19</sup>F NMR** (470 MHz, CDCl<sub>3</sub>, 25°C, δ): -115.4 (d, *J* = 55.9 Hz).

**HRMS-FIA(m/z)** calc'd for C<sub>28</sub>H<sub>31</sub>F<sub>2</sub>N<sub>2</sub>O<sub>2</sub> [M+H]<sup>+</sup>: 481.2297; found: 481.2317.

## Syntheses of $^{18}\text{F}$ -Difluoromethylarenes

### General Methods for Radioisotope Preparation

A GE PETtrace 16.5 MeV cyclotron was used for [ $^{18}\text{F}$ ]fluoride production by the  $^{18}\text{O}(\text{p},\text{n})^{18}\text{F}$  nuclear reaction to irradiate  $^{18}\text{O}$ -enriched water. [ $^{18}\text{F}$ ]fluoride was delivered to a lead-shielded hot cell in  $^{18}\text{O}$ -enriched water by nitrogen gas pressure. [ $^{18}\text{F}$ ]Fluoride was prepared for radiofluorination by the following method: a solution of TEAB (2 mg) in acetonitrile and water (1 mL, v/v 7:3) was added to an aliquot of target water ( $\leq 1$  mL) containing the appropriate amount of [ $^{18}\text{F}$ ]fluoride (2–4 mCi) in a V-shaped vial sealed with a Teflon-lined septum. The vial was heated to 110 °C while nitrogen gas was passed through a  $\text{P}_2\text{O}_5$ -Drierite™ column followed by a vented needle. When no liquid was visible in the vial, it was removed from heat, anhydrous acetonitrile (1 mL) was added, and the heating was resumed until dryness. This step was repeated an additional two times. The vial was then cooled to room temperature under nitrogen flow (10 mL/min). The contents were redissolved in the anhydrous acetonitrile (80  $\mu\text{L}$ , solution A).

### General Methods for Analysis of Radiofluorination Reactions

RadioTLC: EMD TLC Silica gel 60 plates (10 x 2 cm) were spotted with an aliquot (1–5  $\mu\text{L}$ ) of crude reaction mixture approximately 1 cm from the bottom of the plate (baseline). TLC plates were developed in a chamber containing ethyl acetate until within 1 cm of the top of the plate (front). Analysis was performed using a Bioscan AR-2000 radio-TLC imaging scanner and WinScan software.

RadioHPLC: A Phenomenex Luna C18, 250 x 4.6 mm, 5  $\mu\text{m}$  HPLC column was used with a Waters 1515 Isocratic HPLC Pump equipped with a Waters 2487 Dual  $\lambda$  Absorbance Detector, a Bioscan Flow-Count equipped with a NaI crystal, and Breeze software.



**Table S2. Optimization of  $^{18}\text{F}$ -Labeling Conditions**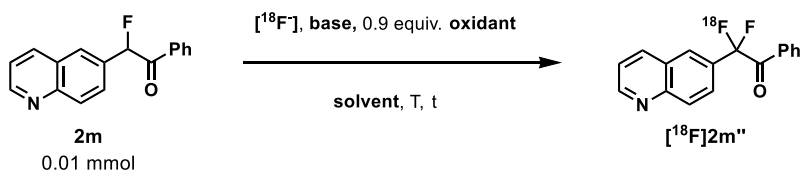

| base                                               | oxidant      | T      | t      | solvent                                                | RCC (TLC) |
|----------------------------------------------------|--------------|--------|--------|--------------------------------------------------------|-----------|
| TEAB (3.5 mg)                                      | NBS (1.6 mg) | 80 °C  | 10 min | MeCN (0.22 mL)                                         | 10%       |
| TEAB (3.5 mg)                                      | NBS (1.6 mg) | 80 °C  | 10 min | MeCN/PhH (20 $\mu\text{L}$ /0.2 mL)                    | 36%       |
| TEAB (3.5 mg)                                      | NBS (1.6 mg) | 80 °C  | 10 min | MeCN/PhCl (20 $\mu\text{L}$ /0.2 mL)                   | 42%       |
| TEAB (3.5 mg)                                      | NBS (1.6 mg) | 80 °C  | 10 min | MeCN/THF (20 $\mu\text{L}$ /0.2 mL)                    | 4%        |
| TEAB (3.5 mg)                                      | NBS (1.6 mg) | 80 °C  | 10 min | MeCN/ $\text{Bu}_2\text{O}$ (20 $\mu\text{L}$ /0.2 mL) | 37%       |
| TEAB (3.5 mg)                                      | NBS (1.6 mg) | 100 °C | 10 min | MeCN/PhCl (20 $\mu\text{L}$ /0.2 mL)                   | 68%       |
| TEAB (3.5 mg)                                      | NBS (1.6 mg) | 120 °C | 10 min | MeCN/PhCl (20 $\mu\text{L}$ /0.2 mL)                   | 55%       |
| $\text{K}_2\text{CO}_3/18\text{-C-6}$ (2 mg/10 mg) | NBS (1.6 mg) | 100 °C | 10 min | MeCN/PhCl (20 $\mu\text{L}$ /0.2 mL)                   | 53%       |
| TEAB (5.5 mg)                                      | NBS (1.6 mg) | 100 °C | 10 min | MeCN/PhCl (20 $\mu\text{L}$ /0.2 mL)                   | 66%       |
| TEAB (1.5 mg)                                      | NBS (1.6 mg) | 100 °C | 10 min | MeCN/PhCl (20 $\mu\text{L}$ /0.2 mL)                   | 53%       |
| TEAB (3.5 mg)                                      | NIS (2.0 mg) | 100 °C | 10 min | MeCN/PhCl (20 $\mu\text{L}$ /0.2 mL)                   | 26%       |
| TEAB (3.5 mg)                                      | NCS (1.2 mg) | 100 °C | 10 min | MeCN/PhCl (20 $\mu\text{L}$ /0.2 mL)                   | 13%       |
| TEAB (3.5 mg)                                      | NBP (2.0 mg) | 100 °C | 10 min | MeCN/PhCl (20 $\mu\text{L}$ /0.2 mL)                   | 73%       |
| TEAB (3.5 mg)                                      | NBP (2.0 mg) | 100 °C | 5 min  | MeCN/PhCl (20 $\mu\text{L}$ /0.2 mL)                   | 72%       |

A 1-dram (4 mL) glass vial loaded with base, precursor **2m** (2.7 mg, 10  $\mu\text{mol}$ ) and oxidant (9  $\mu\text{mol}$ ) were added solvent (0.2 mL) and the solution A (20  $\mu\text{L}$ ). The radioactivity of the mixture was measured. Then the reaction vessel was heated at given temperature. After the reaction time was over, the reaction vessel was cooled down to room temperature. MeCN (2 mL) was added to the reaction mixture. An aliquot from combined solution was removed and analyzed by radio TLC for radiochemical conversion and radio HPLC for product identity.

Radio HPLC chromatogram:

Column: Luna 5u C18 100 Å 250 × 4.6 mm

Mobile phase: 60%  $\text{CH}_3\text{CN}$ , 40% 0.1 M  $\text{NH}_4\cdot\text{HCO}_2$  (aq)

Flow rate: 1 mL/min

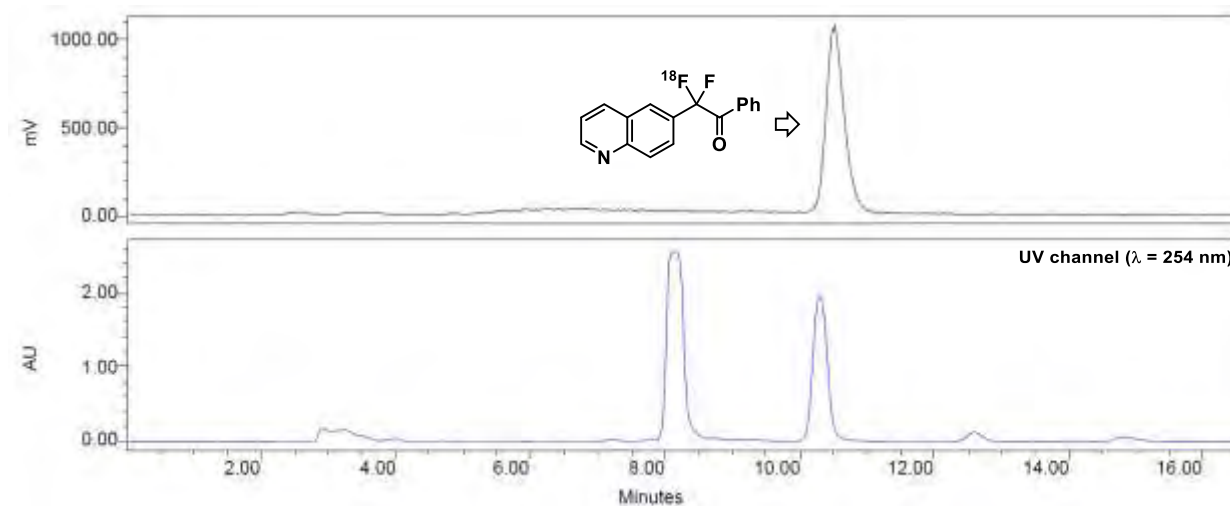

**Figure S1.** Co-injection radio-HPLC chromatogram of [ $^{18}\text{F}$ ]2m

### General Procedure for Syntheses of $^{18}\text{F}$ -Difluoromethylarenes

To a 1-dram (4 mL) glass vial containing TEAB (3.0 mg), precursor **2** (10  $\mu\text{mol}$ ) and N-bromophthalimide (2 mg) was added chlorobenzene (0.2 mL). Then solution A (20  $\mu\text{L}$ ) was added and radioactivity of the mixture was measured. The reaction vessel was heated at 100  $^{\circ}\text{C}$  for 5 min. After that, aqueous KOH solution (45 w%, 40  $\mu\text{L}$ ) was added, and the mixture was heated at 100  $^{\circ}\text{C}$  for 15 min. The reaction vessel was cooled to room temperature and added MeCN (0.4 mL). The mixture was filtered through light silica cartridge and eluted with MeCN (2 x 0.8 mL). The radioactivity of the combined filtrate was measured to calculate the radiochemical yield. An aliquot from combined filtrate was removed and analyzed by radio-TLC and radio-HPLC (column: Luna 5u C18 100  $\text{\AA}$  250  $\times$  4.6 mm. UV wavelength: 230, 254, or 290 nm for radiochemical purity and product identity. The radiochemical yield was corrected by the radiochemical purity, whichever lower number form radio-TLC or radio-HPLC results. Each radiochemical labeling was conducted three times ( $n = 3$ ).

### Method of the RCY determination by SPE

All the radiolabeled compounds were purified by flash chromatography (a short silica cartridge purchased from Waters, Inc Catalog # WAT023537), which removed precipitates and unreacted  $^{18}\text{F}$ -fluoride. The overall radioactivity of filtrate was measured and an aliquot was removed and analyzed by radio-TLC and radio-HPLC. The radiochemical purity was determined by the ratio of peak area between [ $^{18}\text{F}$ ]difluoromethylarene and all radioactive peaks. The radiochemical yield of [ $^{18}\text{F}$ ]difluoromethylarene was calculated by the following equation.

$$\text{RCY} = \frac{[\text{radiochemical purity}] \times [\text{all collected activity by silica cartridge method}]}{[\text{starting radioactivity as } ^{18}\text{F fluoride}]}$$

**[<sup>18</sup>F]Difluoromethyl-benzodioxole ([<sup>18</sup>F]3a)**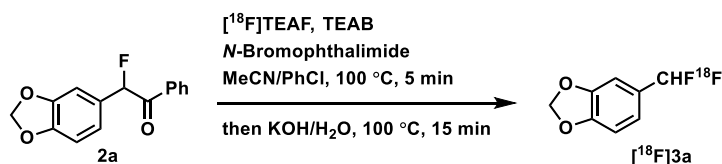

To a 1-dram (4 mL) glass vial containing TEAB (3.0 mg), precursor **2a** (2.9 mg, 10  $\mu\text{mol}$ ) and *N*-bromophthalimide (2.0 mg) was added chlorobenzene (0.2 mL). Then solution A (20  $\mu\text{L}$ ) was added and radioactivity of the mixture was measured. The reaction vessel was heated at 100  $^\circ\text{C}$  for 5 min. After that, aqueous KOH solution (45 w%, 40  $\mu\text{L}$ ) was added, and the mixture was heated at 100  $^\circ\text{C}$  for 15 min. The reaction vessel was cooled down to room temperature and added MeCN (0.4 mL). The mixture was filtered through light silica cartridge and eluted with MeCN ( $2 \times 0.8$  mL). The radioactivity of the combined filtrate was measured to calculate the radiochemical yield. An aliquot from combined filtrate was removed and analyzed by radio TLC and HPLC for radiochemical purity and product identity. The radiochemical yield was corrected by the radiochemical purity, the lower one of radio TLC or HPLC.

| entry | Initial radio-activity | Collected radio-activity | Radio-TLC purity | Radio-HPLC purity | RCY |
|-------|------------------------|--------------------------|------------------|-------------------|-----|
| 1     | 625 $\mu\text{Ci}$     | 213 $\mu\text{Ci}$       | 98%              | 95%               | 32% |
| 2     | 831 $\mu\text{Ci}$     | 227 $\mu\text{Ci}$       | 98%              | 98%               | 27% |
| 3     | 740 $\mu\text{Ci}$     | 202 $\mu\text{Ci}$       | 98%              | 100%              | 27% |

**RCY** =  $29 \pm 2\%$  ( $n = 3$ )

Radio HPLC chromatogram:

Column: Luna 5u C18 100  $\text{\AA}$  250  $\times$  4.6 mm

Mobile phase: 50%  $\text{CH}_3\text{CN}$ , 50% 0.1 M  $\text{NH}_4\cdot\text{HCO}_2$  (aq)

Flow rate: 1 mL/min

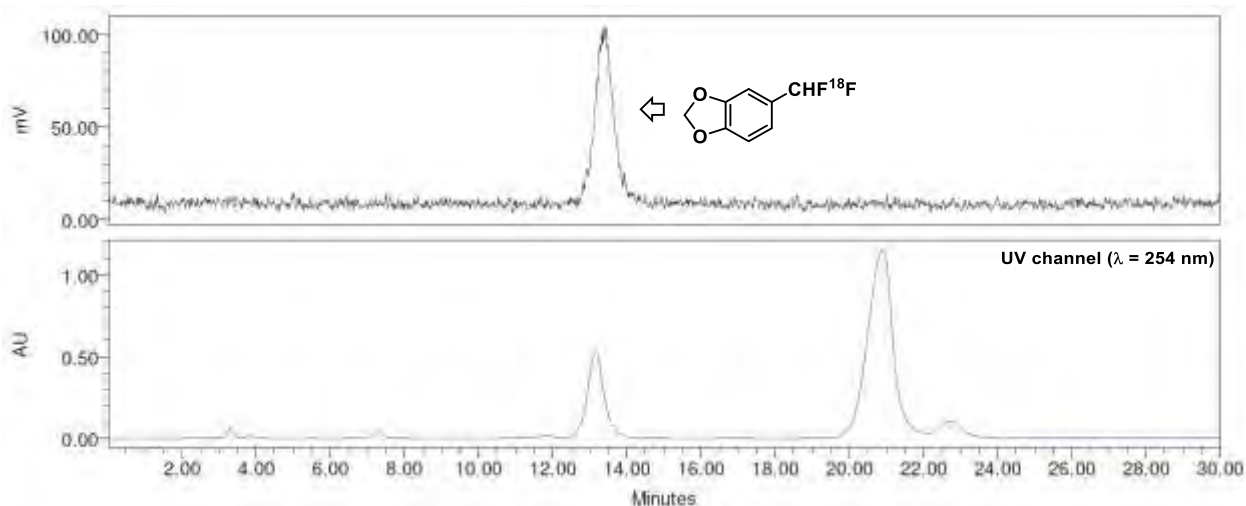

**Figure S2.** Co-injection radio HPLC chromatogram of [<sup>18</sup>F]3a

**[<sup>18</sup>F]N-Boc-N-methyl-difluoromethylaniline ([<sup>18</sup>F]3b)**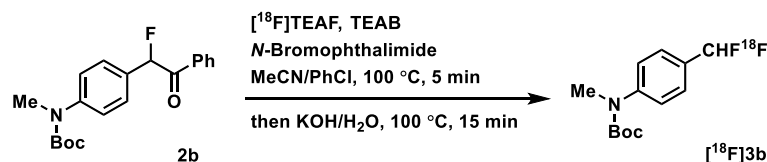

To a 1-dram (4 mL) glass vial containing TEAB (3.0 mg), precursor **2b** (3.4 mg, 10 μmol) and *N*-bromophthalimide (2.0 mg) was added chlorobenzene (0.2 mL). Then solution A (20 μL) was added and radioactivity of the mixture was measured. The reaction vessel was heated at 100 °C for 5 min. After that, aqueous KOH solution (45 w%, 40 μL) was added, and the mixture was heated at 100 °C for 15 min. The reaction vessel was cooled down to room temperature and added MeCN (0.4 mL). The mixture was filtered through light silica cartridge and eluted with MeCN (2 × 0.8 mL). The radioactivity of the combined filtrate was measured to calculate the radiochemical yield. An aliquot from combined filtrate was removed and analyzed by radio TLC and HPLC for radiochemical purity and product identity. The radiochemical yield was corrected by the radiochemical purity, the lower one of radio TLC or HPLC.

| entry | Initial radio-activity | Collected radio-activity | Radio-TLC purity | Radio-HPLC purity | RCY |
|-------|------------------------|--------------------------|------------------|-------------------|-----|
| 1     | 546 μCi                | 222 μCi                  | 100%             | 72%               | 29% |
| 2     | 392 μCi                | 146 μCi                  | 100%             | 75%               | 28% |
| 3     | 432 μCi                | 176 μCi                  | 100%             | 76%               | 31% |

RCY = 29 ± 1% (*n* = 3)

Radio HPLC chromatogram:

Column: Luna 5u C18 100 Å 250 × 4.6 mm

Mobile phase: 60% CH<sub>3</sub>CN, 40% 0.1 M NH<sub>4</sub>·HCO<sub>2</sub> (aq)

Flow rate: 1 mL/min

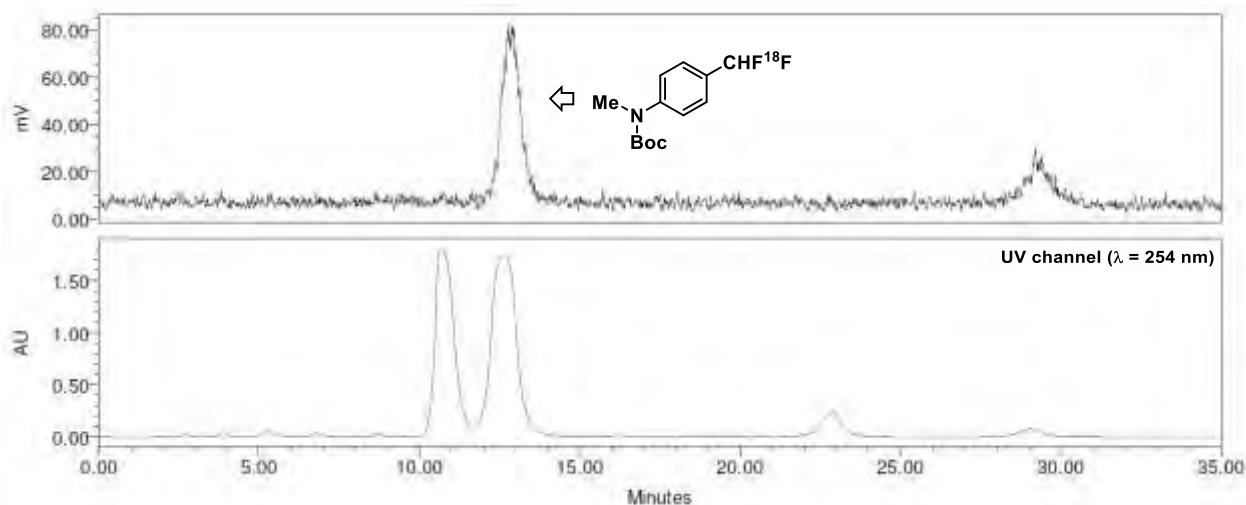

**Figure S3.** Co-injection radio HPLC chromatogram of [<sup>18</sup>F]3b

**[<sup>18</sup>F]3-Cyanocyclopropyl-difluoromethylbenzene ([<sup>18</sup>F]3c)**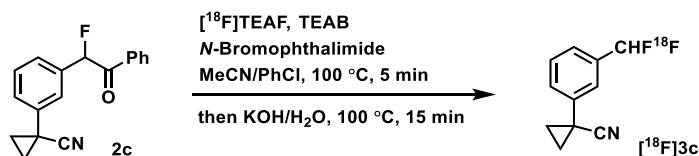

To a 1-dram (4 mL) glass vial containing TEAB (3.0 mg), precursor **2c** (2.8 mg, 10  $\mu$ mol) and *N*-bromophthalimide (2.0 mg) was added chlorobenzene (0.2 mL). Then solution A (20  $\mu$ L) was added and radioactivity of the mixture was measured. The reaction vessel was heated at 100  $^\circ$ C for 5 min. After that, aqueous KOH solution (45 w%, 40  $\mu$ L) was added, and the mixture was heated at 100  $^\circ$ C for 15 min. The reaction vessel was cooled down to room temperature and added MeCN (0.4 mL). The mixture was filtered through light silica cartridge and eluted with MeCN (2  $\times$  0.8 mL). The radioactivity of the combined filtrate was measured to calculate the radiochemical yield. An aliquot from combined filtrate was removed and analyzed by radio TLC and HPLC for radiochemical purity and product identity. The radiochemical yield was corrected by the radiochemical purity, the lower one of radio TLC or HPLC.

| entry | Initial radio-activity | Collected radio-activity | Radio-TLC purity | Radio-HPLC purity | RCY |
|-------|------------------------|--------------------------|------------------|-------------------|-----|
| 1     | 629 $\mu$ Ci           | 384 $\mu$ Ci             | 95%              | 96%               | 58% |
| 2     | 700 $\mu$ Ci           | 407 $\mu$ Ci             | 95%              | 94%               | 55% |
| 3     | 560 $\mu$ Ci           | 293 $\mu$ Ci             | 95%              | 96%               | 50% |

**RCY** = 54  $\pm$  3% ( $n$  = 3)

Radio HPLC chromatogram:

Column: Luna 5u C18 100  $\text{\AA}$  250  $\times$  4.6 mm

Mobile phase: 60% CH<sub>3</sub>CN, 40% 0.1 M NH<sub>4</sub>·HCO<sub>2</sub> (aq)

Flow rate: 1 mL/min

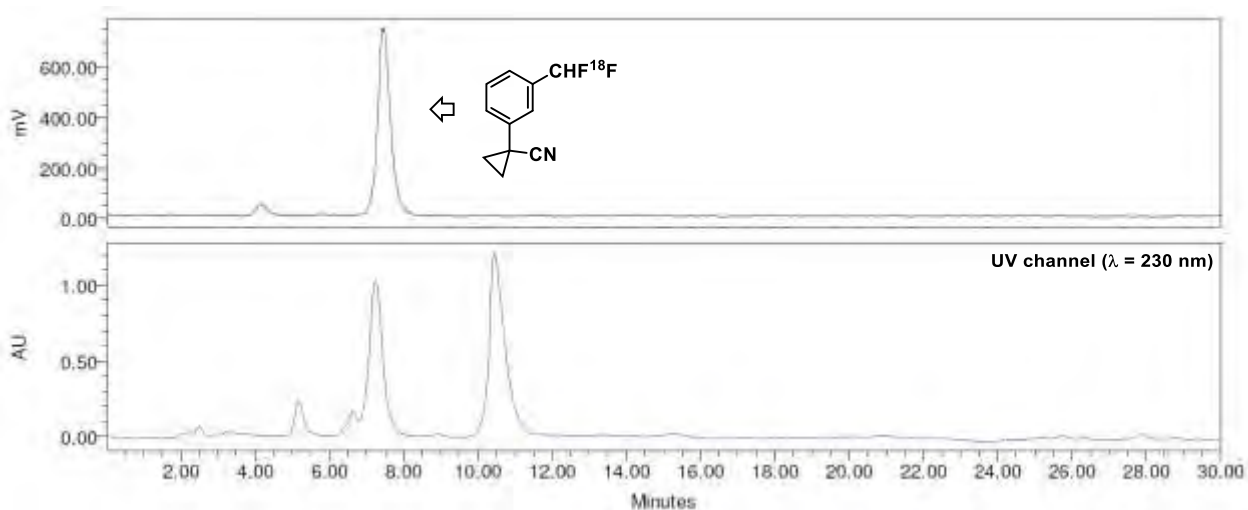

**Figure S4.** Co-injection radio HPLC chromatogram of [<sup>18</sup>F]3c

**[<sup>18</sup>F]3-Isopropanolyl-difluoromethylbenzene ([<sup>18</sup>F]3d)**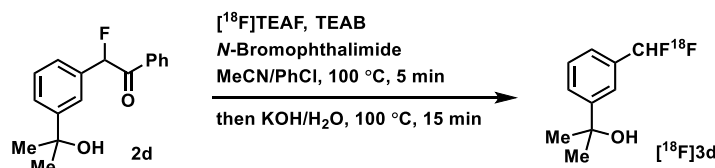

To a 1-dram (4 mL) glass vial containing TEAB (3.0 mg), precursor **2d** (2.7 mg, 10 μmol) and *N*-bromophthalimide (2.0 mg) was added chlorobenzene (0.2 mL). Then solution A (20 μL) was added and radioactivity of the mixture was measured. The reaction vessel was heated at 100 °C for 5 min. After that, aqueous KOH solution (45 w%, 40 μL) was added, and the mixture was heated at 100 °C for 15 min. The reaction vessel was cooled down to room temperature and added MeCN (0.4 mL). The mixture was filtered through light silica cartridge and eluted with MeCN (2 × 0.8 mL). The radioactivity of the combined filtrate was measured to calculate the radiochemical yield. An aliquot from combined filtrate was removed and analyzed by radio TLC and HPLC for radiochemical purity and product identity. The radiochemical yield was corrected by the radiochemical purity, the lower one of radio TLC or HPLC.

| entry | Initial radio-activity | Collected radio-activity | Radio-TLC purity | Radio-HPLC purity | RCY |
|-------|------------------------|--------------------------|------------------|-------------------|-----|
| 1     | 797 μCi                | 323 μCi                  | 99%              | 98%               | 40% |
| 2     | 615 μCi                | 210 μCi                  | 99%              | 96%               | 33% |
| 3     | 543 μCi                | 195 μCi                  | 97%              | 98%               | 35% |

**RCY** = 36 ± 3% (*n* = 3)

Radio HPLC chromatogram:

Column: Luna 5u C18 100 Å 250 × 4.6 mm

Mobile phase: 50% CH<sub>3</sub>CN, 50% 0.1 M NH<sub>4</sub>·HCO<sub>2</sub> (aq)

Flow rate: 1 mL/min

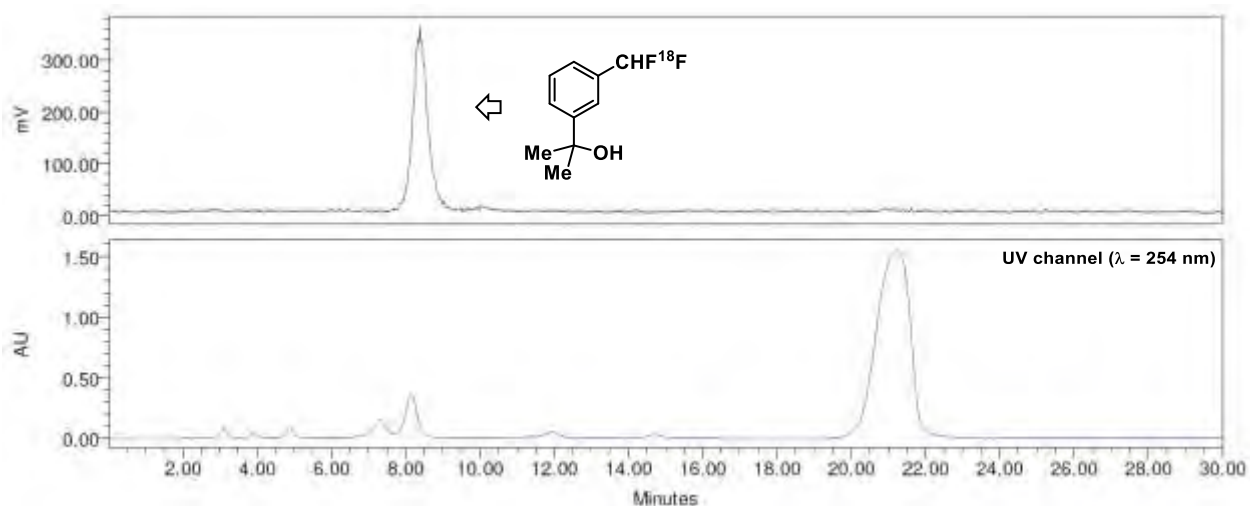

**Figure S5.** Co-injection radio HPLC chromatogram of [<sup>18</sup>F]3d

**[<sup>18</sup>F]3-Chloro-5-(phenylethynyl)-difluoromethylbenzene ([<sup>18</sup>F]3e)**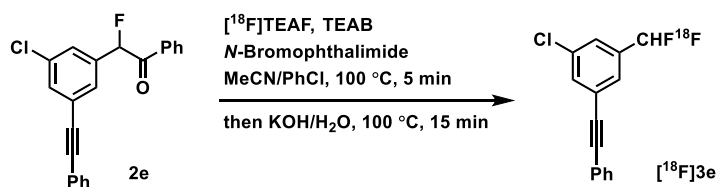

To a 1-dram (4 mL) glass vial containing TEAB (3.0 mg), precursor **2e** (3.5 mg, 10 μmol) and *N*-bromophthalimide (2.0 mg) was added chlorobenzene (0.2 mL). Then solution A (20 μL) was added and radioactivity of the mixture was measured. The reaction vessel was heated at 100 °C for 5 min. After that, aqueous KOH solution (45 w%, 40 μL) was added, and the mixture was heated at 100 °C for 15 min. The reaction vessel was cooled down to room temperature and added MeCN (0.4 mL). The mixture was filtered through light silica cartridge and eluted with MeCN (2 × 0.8 mL). The radioactivity of the combined filtrate was measured to calculate the radiochemical yield. An aliquot from combined filtrate was removed and analyzed by radio TLC and HPLC for radiochemical purity and product identity. The radiochemical yield was corrected by the radiochemical purity, the lower one of radio TLC or HPLC.

| entry | Initial radio-activity | Collected radio-activity | Radio-TLC purity | Radio-HPLC purity | RCY |
|-------|------------------------|--------------------------|------------------|-------------------|-----|
| 1     | 510 μCi                | 326 μCi                  | 100%             | 100%              | 64% |
| 2     | 470 μCi                | 272 μCi                  | 100%             | 100%              | 58% |
| 3     | 460 μCi                | 275 μCi                  | 100%             | 100%              | 60% |

**RCY** = 61 ± 2% (*n* = 3)

Radio HPLC chromatogram:

Column: Luna 5u C18 100 Å 250 × 4.6 mm

Mobile phase: 80% CH<sub>3</sub>CN, 20% 0.1 M NH<sub>4</sub>·HCO<sub>2</sub> (aq)

Flow rate: 1 mL/min

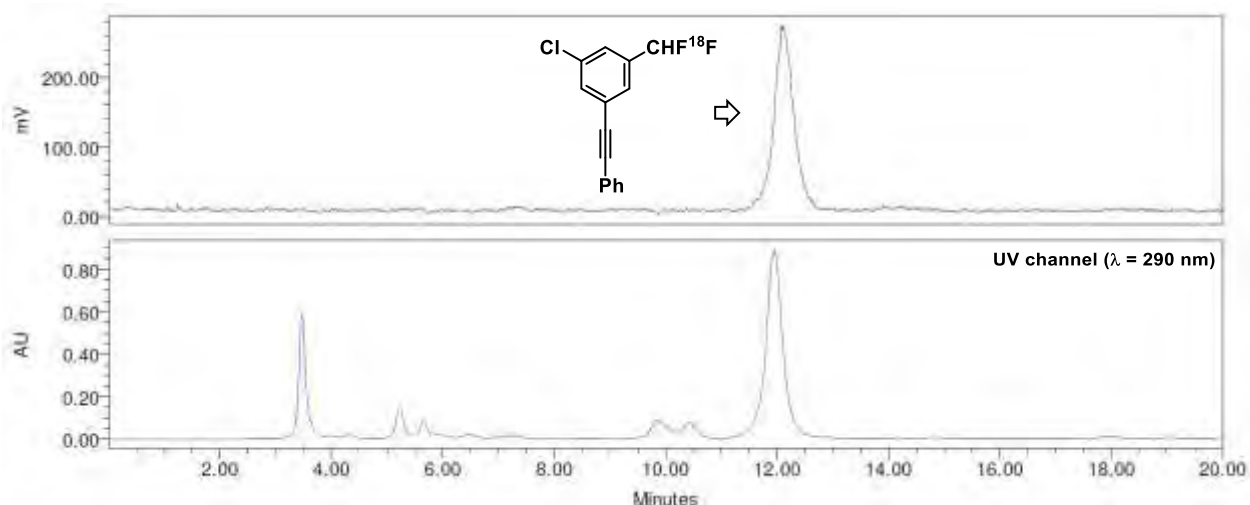

**Figure S6.** Co-injection radio HPLC chromatogram of [<sup>18</sup>F]3e

**[<sup>18</sup>F]4-Pyrazolyl-difluoromethylbenzene ([<sup>18</sup>F]3f)**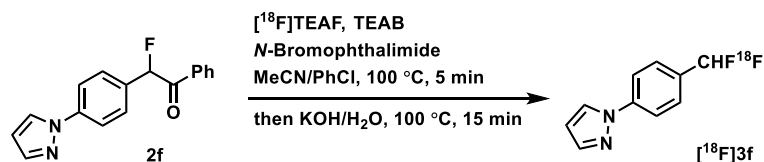

To a 1-dram (4 mL) glass vial containing TEAB (3.0 mg), precursor **2f** (2.8 mg, 10 μmol) and *N*-bromophthalimide (2.0 mg) was added chlorobenzene (0.2 mL). Then solution A (20 μL) was added and radioactivity of the mixture was measured. The reaction vessel was heated at 100 °C for 5 min. After that, aqueous KOH solution (45 w%, 40 μL) was added, and the mixture was heated at 100 °C for 15 min. The reaction vessel was cooled down to room temperature and added MeCN (0.4 mL). The mixture was filtered through light silica cartridge and eluted with MeCN (2 × 0.8 mL). The radioactivity of the combined filtrate was measured to calculate the radiochemical yield. An aliquot from combined filtrate was removed and analyzed by radio TLC and HPLC for radiochemical purity and product identity. The radiochemical yield was corrected by the radiochemical purity, the lower one of radio TLC or HPLC.

| entry | Initial radio-activity | Collected radio-activity | Radio-TLC purity | Radio-HPLC purity | RCY |
|-------|------------------------|--------------------------|------------------|-------------------|-----|
| 1     | 574 μCi                | 298 μCi                  | 100%             | 100%              | 52% |
| 2     | 501 μCi                | 251 μCi                  | 100%             | 100%              | 50% |
| 3     | 710 μCi                | 350 μCi                  | 100%             | 99%               | 49% |

**RCY** = 50 ± 1% (*n* = 3)

Radio HPLC chromatogram:

Column: Luna 5u C18 100 Å 250 × 4.6 mm

Mobile phase: 60% CH<sub>3</sub>CN, 40% 0.1 M NH<sub>4</sub>·HCO<sub>2</sub> (aq)

Flow rate: 1 mL/min

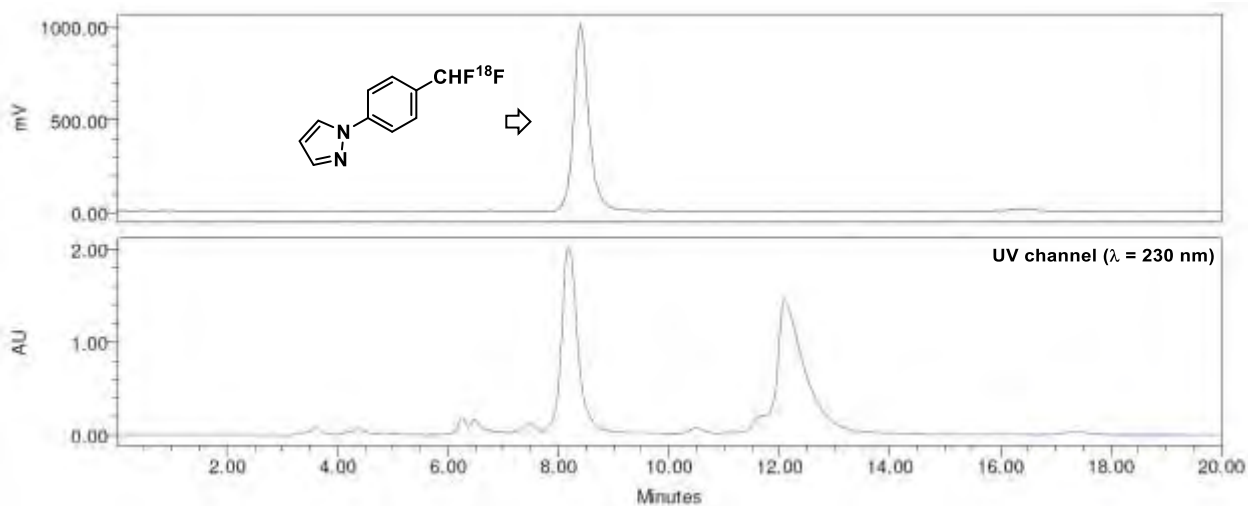

**Figure S7.** Co-injection radio HPLC chromatogram of [<sup>18</sup>F]3f



**[<sup>18</sup>F]3-Morpholino-difluoromethylbenzene ([<sup>18</sup>F]3g)**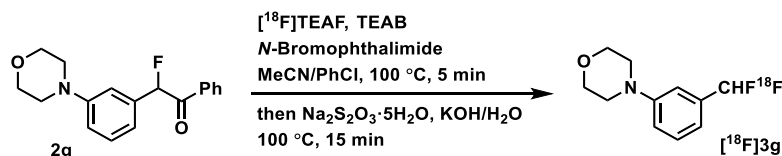

To a 1-dram (4 mL) glass vial containing TEAB (3.0 mg), precursor **1d** (3.0 mg, 10  $\mu\text{mol}$ ) and *N*-bromophthalimide (4.2 mg) was added chlorobenzene (0.2 mL). Then solution A (20  $\mu\text{L}$ ) was added and radioactivity of the mixture was measured. The reaction vessel was heated at 100  $^\circ\text{C}$  for 5 min. After that,  $\text{Na}_2\text{S}_2\text{O}_3 \cdot 5\text{H}_2\text{O}$  (5 mg) and aqueous KOH solution (45 w%, 40  $\mu\text{L}$ ) were added. The mixture was heated at 100  $^\circ\text{C}$  for 15 min. The reaction vessel was cooled down to room temperature and added MeCN (0.4 mL). The mixture was filtered through light silica cartridge and eluted with MeCN ( $2 \times 0.8$  mL). The radioactivity of the combined filtrate was measured to calculate the radiochemical yield. An aliquot from combined filtrate was removed and analyzed by radio TLC and HPLC for radiochemical purity and product identity. The radiochemical yield was corrected by the radiochemical purity, the lower one of radio TLC or HPLC.

| entry | Initial radio-activity | Collected radio-activity | Radio-TLC purity | Radio-HPLC purity | RCY |
|-------|------------------------|--------------------------|------------------|-------------------|-----|
| 1     | 383 $\mu\text{Ci}$     | 100 $\mu\text{Ci}$       | 78%              | 60%               | 16% |
| 2     | 394 $\mu\text{Ci}$     | 105 $\mu\text{Ci}$       | 75%              | 50%               | 13% |
| 3     | 520 $\mu\text{Ci}$     | 155 $\mu\text{Ci}$       | 75%              | 60%               | 18% |

RCY =  $16 \pm 2\%$  ( $n = 3$ )

Radio HPLC chromatogram:

Column: Luna 5u C18 100  $\text{\AA}$  250  $\times$  4.6 mm

Mobile phase: 50%  $\text{CH}_3\text{CN}$ , 50% 0.1 M  $\text{NH}_4 \cdot \text{HCO}_2$  (aq)

Flow rate: 1 mL/min

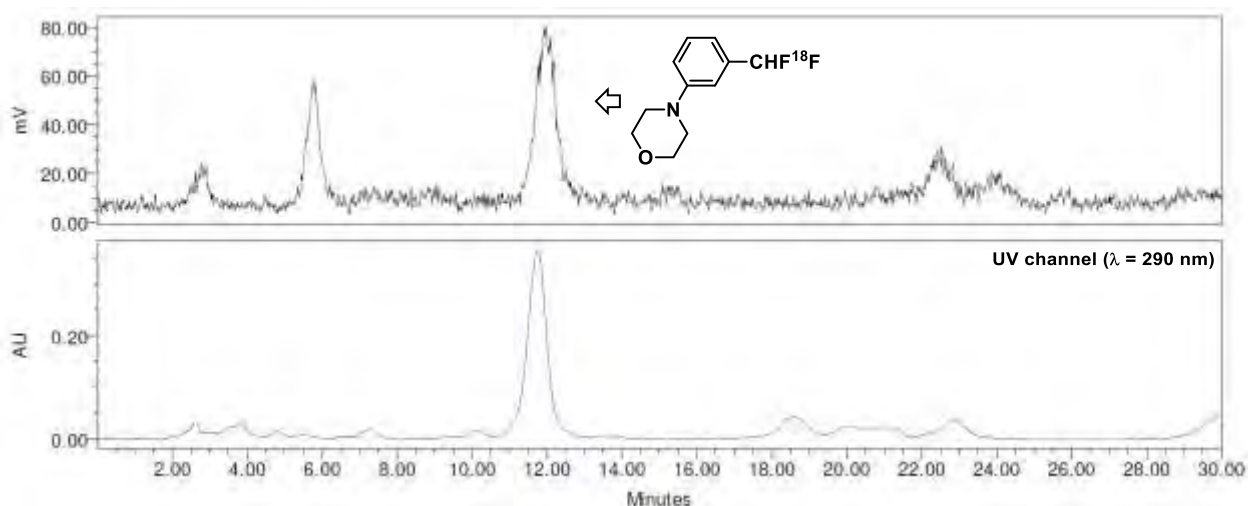

**Figure S8.** Co-injection radio HPLC chromatogram of [<sup>18</sup>F]3g

**[<sup>18</sup>F]3-Nitro-difluoromethylbenzene ([<sup>18</sup>F]3h)**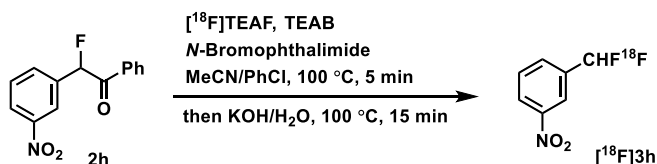

To a 1-dram (4 mL) glass vial containing TEAB (3.0 mg), precursor **2h** (2.6 mg, 10 μmol) and *N*-bromophthalimide (2.0 mg) was added chlorobenzene (0.2 mL). Then solution A (20 μL) was added and radioactivity of the mixture was measured. The reaction vessel was heated at 100 °C for 5 min. After that, aqueous KOH solution (45 w%, 40 μL) was added, and the mixture was heated at 100 °C for 15 min. The reaction vessel was cooled down to room temperature and added MeCN (0.4 mL). The mixture was filtered through light silica cartridge and eluted with MeCN (2 × 0.8 mL). The radioactivity of the combined filtrate was measured to calculate the radiochemical yield. An aliquot from combined filtrate was removed and analyzed by radio TLC and HPLC for radiochemical purity and product identity. The radiochemical yield was corrected by the radiochemical purity, the lower one of radio TLC or HPLC.

| entry | Initial radio-activity | Collected radio-activity | Radio-TLC purity | Radio-HPLC purity | RCY |
|-------|------------------------|--------------------------|------------------|-------------------|-----|
| 1     | 356 μCi                | 156 μCi                  | 99%              | 99%               | 43% |
| 2     | 541 μCi                | 268 μCi                  | 99%              | 99%               | 49% |
| 3     | 474 μCi                | 230 μCi                  | 99%              | 99%               | 48% |

**RCY** = 47 ± 3% (*n* = 3)

Radio HPLC chromatogram:

Column: Luna 5u C18 100 Å 250 × 4.6 mm

Mobile phase: 60% CH<sub>3</sub>CN, 40% 0.1 M NH<sub>4</sub>·HCO<sub>2</sub> (aq)

Flow rate: 1 mL/min

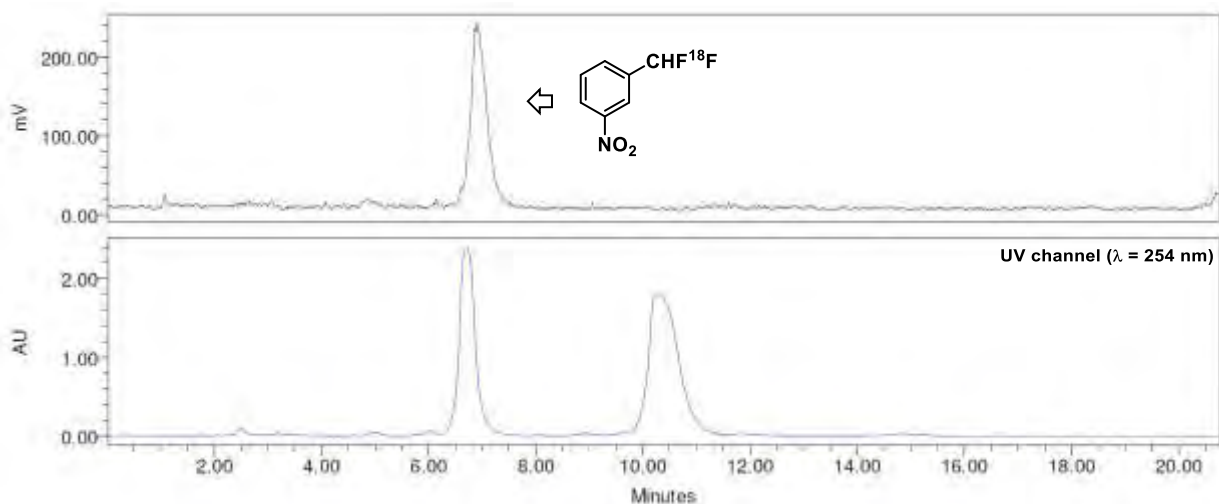

**Figure S9.** Co-injection radio HPLC chromatogram of [<sup>18</sup>F]3h

**[<sup>18</sup>F]2-Difluoromethylfluoren-9-one ([<sup>18</sup>F]3i)**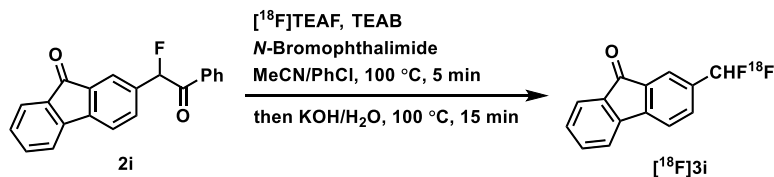

To a 1-dram (4 mL) glass vial containing TEAB (3.0 mg), precursor **2i** (3.2 mg, 10  $\mu\text{mol}$ ) and *N*-bromophthalimide (2.0 mg) was added chlorobenzene (0.2 mL). Then solution A (20  $\mu\text{L}$ ) was added and radioactivity of the mixture was measured. The reaction vessel was heated at 100  $^\circ\text{C}$  for 5 min. After that, aqueous KOH solution (45 w%, 40  $\mu\text{L}$ ) was added, and the mixture was heated at 100  $^\circ\text{C}$  for 15 min. The reaction vessel was cooled down to room temperature and added MeCN (0.4 mL). The mixture was filtered through light silica cartridge and eluted with MeCN ( $2 \times 0.8$  mL). The radioactivity of the combined filtrate was measured to calculate the radiochemical yield. An aliquot from combined filtrate was removed and analyzed by radio TLC and HPLC for radiochemical purity and product identity. The radiochemical yield was corrected by the radiochemical purity, the lower one of radio TLC or HPLC.

| entry | Initial radio-activity | Collected radio-activity | Radio-TLC purity | Radio-HPLC purity | RCY |
|-------|------------------------|--------------------------|------------------|-------------------|-----|
| 1     | 160 $\mu\text{Ci}$     | 66 $\mu\text{Ci}$        | 99%              | 97%               | 40% |
| 2     | 112 $\mu\text{Ci}$     | 48 $\mu\text{Ci}$        | 100%             | 100%              | 43% |
| 3     | 375 $\mu\text{Ci}$     | 150 $\mu\text{Ci}$       | 100%             | 100%              | 40% |

**RCY** =  $41 \pm 1\%$  ( $n = 3$ )

Radio HPLC chromatogram:

Column: Luna 5u C18 100  $\text{\AA}$  250  $\times$  4.6 mm

Mobile phase: 70%  $\text{CH}_3\text{CN}$ , 30% 0.1 M  $\text{NH}_4\cdot\text{HCO}_2$  (aq)

Flow rate: 1 mL/min

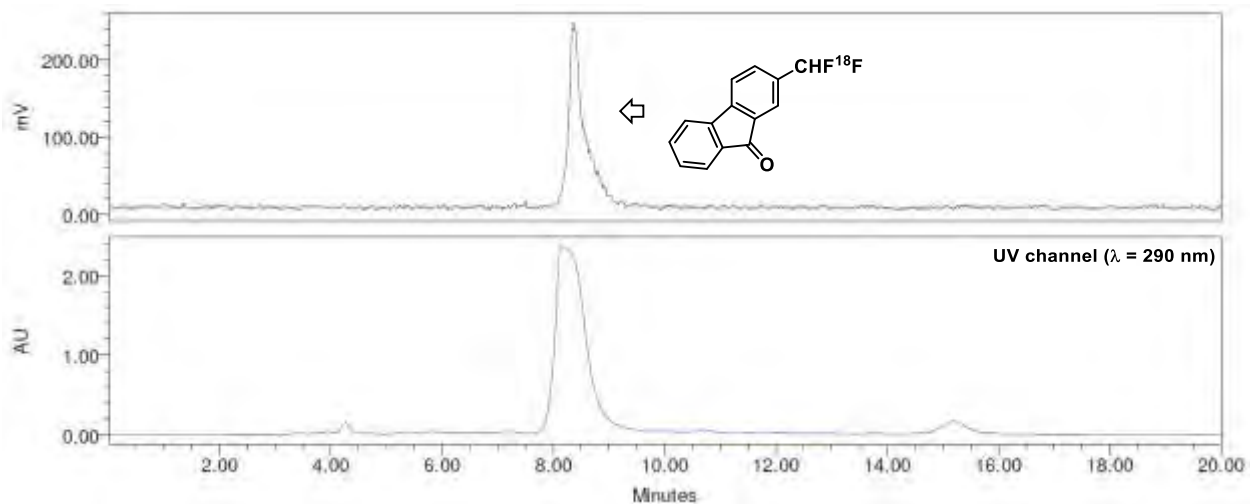

**Figure S10.** Co-injection radio HPLC chromatogram of [<sup>18</sup>F]3i

**[<sup>18</sup>F]Ethyl 4-difluoromethyl-benzoate ([<sup>18</sup>F]3j)**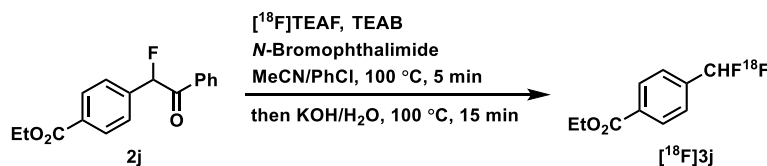

To a 1-dram (4 mL) glass vial containing TEAB (3.0 mg), precursor **2j** (2.9 mg, 10 μmol) and *N*-bromophthalimide (2.0 mg) was added chlorobenzene (0.2 mL). Then solution A (20 μL) was added and radioactivity of the mixture was measured. The reaction vessel was heated at 100 °C for 5 min. After that, aqueous KOH solution (45 w%, 60 μL) was added, and the mixture was heated at 100 °C for 15 min. The reaction vessel was cooled down to room temperature and added MeCN (0.4 mL). The mixture was filtered through light silica cartridge and eluted with MeCN (2 × 0.8 mL). The radioactivity of the combined filtrate was measured to calculate the radiochemical yield. An aliquot from combined filtrate was removed and analyzed by radio TLC and HPLC for radiochemical purity and product identity. The radiochemical yield was corrected by the radiochemical purity, the lower one of radio TLC or HPLC.

| entry | Initial radio-activity | Collected radio-activity | Radio-TLC purity | Radio-HPLC purity | RCY |
|-------|------------------------|--------------------------|------------------|-------------------|-----|
| 1     | 492 μCi                | 175 μCi                  | 93%              | 80%               | 28% |
| 2     | 757 μCi                | 205 μCi                  | 98%              | 89%               | 24% |
| 3     | 767 μCi                | 233 μCi                  | 99%              | 81%               | 25% |

**RCY** = 26 ± 2% (*n* = 3)

Radio HPLC chromatogram:

Column: Luna 5u C18 100 Å 250 × 4.6 mm

Mobile phase: 60% CH<sub>3</sub>CN, 40% 0.1 M NH<sub>4</sub>·HCO<sub>2</sub> (aq)

Flow rate: 1 mL/min

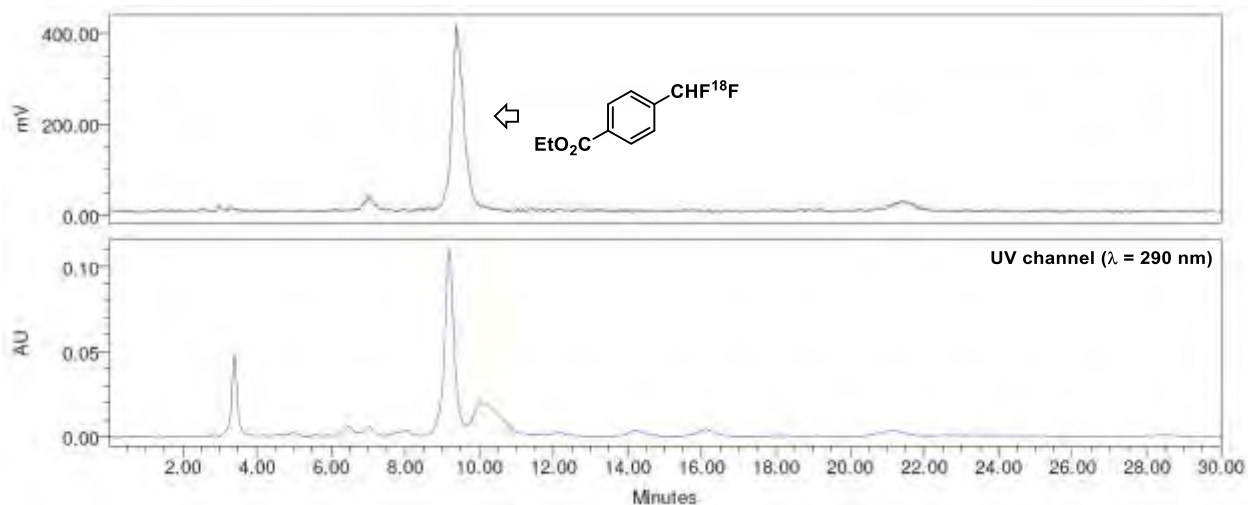

**Figure S11.** Co-injection radio HPLC chromatogram of [<sup>18</sup>F]3j

**[<sup>18</sup>F]3-Difluoromethyl-benzoaldehyde ([<sup>18</sup>F]3k)**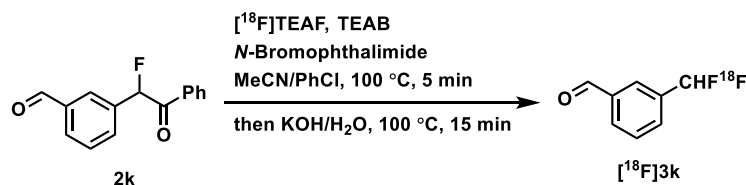

To a 1-dram (4 mL) glass vial containing TEAB (3.0 mg), precursor **2k** (3.5 mg, 10 μmol) and *N*-bromophthalimide (2.0 mg) was added chlorobenzene (0.2 mL). Then solution A (20 μL) was added and radioactivity of the mixture was measured. The reaction vessel was heated at 100 °C for 5 min. After that, aqueous KOH solution (45 w%, 60 μL) was added, and the mixture was heated at 100 °C for 15 min. The reaction vessel was cooled down to room temperature and added MeCN (0.4 mL). The mixture was filtered through light silica cartridge and eluted with MeCN (2 × 0.8 mL). The radioactivity of the combined filtrate was measured to calculate the radiochemical yield. An aliquot from combined filtrate was removed and analyzed by radio TLC and HPLC for radiochemical purity and product identity. The radiochemical yield was corrected by the radiochemical purity, the lower one of radio TLC or HPLC.

| entry | Initial radio-activity | Collected radio-activity | Radio-TLC purity | Radio-HPLC purity | RCY |
|-------|------------------------|--------------------------|------------------|-------------------|-----|
| 1     | 501 μCi                | 115 μCi                  | 85%              | 65%               | 15% |
| 2     | 875 μCi                | 216 μCi                  | 80%              | 40%               | 10% |
| 3     | 784 μCi                | 175 μCi                  | 85%              | 62%               | 14% |

**RCY** = 13 ± 2% (*n* = 3)

Radio HPLC chromatogram:

Column: Luna 5u C18 100 Å 250 × 4.6 mm

Mobile phase: 50% CH<sub>3</sub>CN, 50% 0.1 M NH<sub>4</sub>·HCO<sub>2</sub> (aq)

Flow rate: 1 mL/min

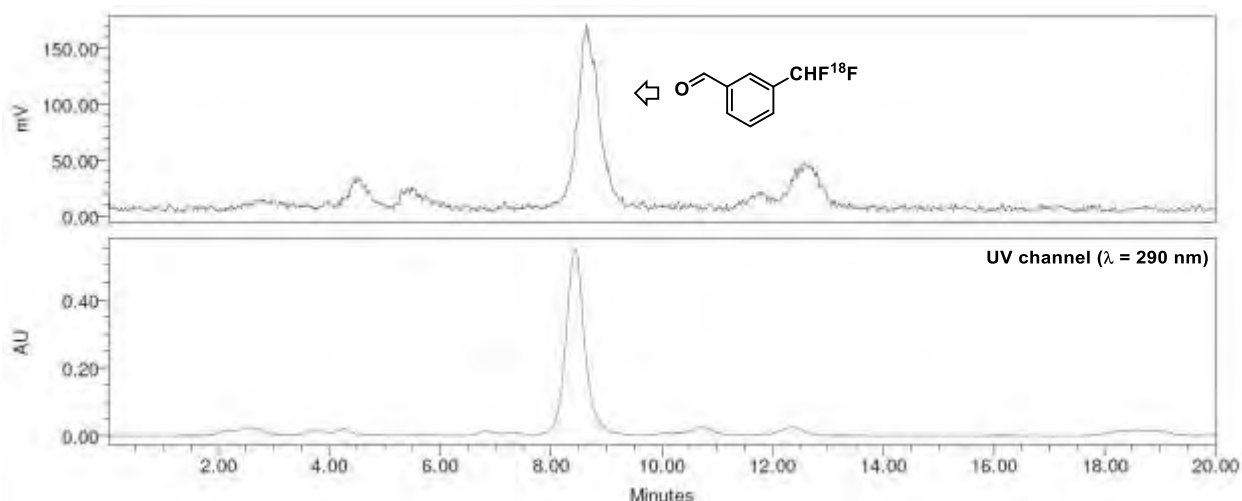

**Figure S12.** Co-injection radio HPLC chromatogram of [<sup>18</sup>F]3k

**[<sup>18</sup>F]2-Chlorophenyl-(4-difluoromethyl)phenyl-methanone ([<sup>18</sup>F]3I)**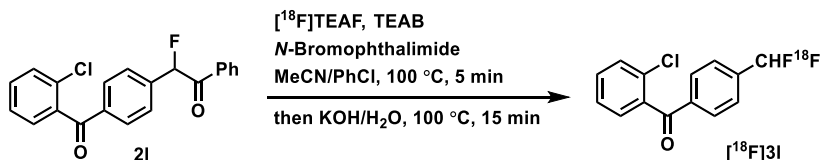

To a 1-dram (4 mL) glass vial containing TEAB (3.0 mg), precursor **2I** (3.5 mg, 10 μmol) and *N*-bromophthalimide (2.0 mg) was added chlorobenzene (0.2 mL). Then solution A (20 μL) was added and radioactivity of the mixture was measured. The reaction vessel was heated at 100 °C for 5 min. After that, aqueous KOH solution (45 w%, 40 μL) was added, and the mixture was heated at 100 °C for 15 min. The reaction vessel was cooled down to room temperature and added MeCN (0.4 mL). The mixture was filtered through light silica cartridge and eluted with MeCN (2 × 0.8 mL). The radioactivity of the combined filtrate was measured to calculate the radiochemical yield. An aliquot from combined filtrate was removed and analyzed by radio TLC and HPLC for radiochemical purity and product identity. The radiochemical yield was corrected by the radiochemical purity, the lower one of radio TLC or HPLC.

| entry | Initial radio-activity | Collected radio-activity | Radio-TLC purity | Radio-HPLC purity | RCY |
|-------|------------------------|--------------------------|------------------|-------------------|-----|
| 1     | 410 μCi                | 218 μCi                  | 90%              | 100%              | 48% |
| 2     | 449 μCi                | 210 μCi                  | 92%              | 100%              | 43% |
| 3     | 401 μCi                | 210 μCi                  | 88%              | 100%              | 46% |

**RCY** = 46 ± 2% (*n* = 3)

Radio HPLC chromatogram:

Column: Luna 5u C18 100 Å 250 × 4.6 mm

Mobile phase: 70% CH<sub>3</sub>CN, 30% 0.1 M NH<sub>4</sub>·HCO<sub>2</sub> (aq)

Flow rate: 1 mL/min

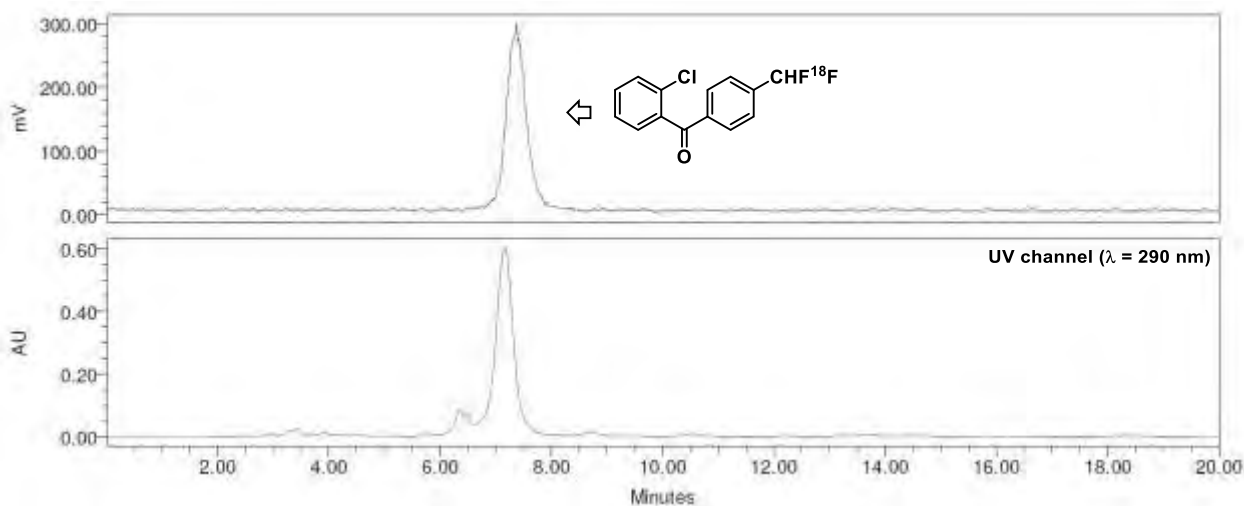

**Figure S13.** Co-injection radio HPLC chromatogram of [<sup>18</sup>F]3I

**[<sup>18</sup>F]6-Difluoromethylquinoline ([<sup>18</sup>F]3m)**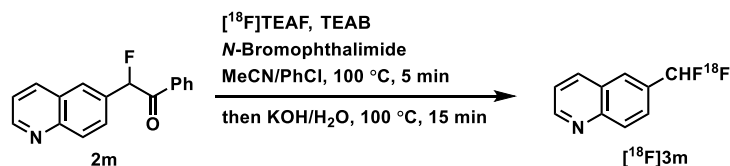

To a 1-dram (4 mL) glass vial containing TEAB (3.0 mg), precursor **2m** (2.7 mg, 10  $\mu\text{mol}$ ) and *N*-bromophthalimide (2.0 mg) was added chlorobenzene (0.2 mL). Then solution A (20  $\mu\text{L}$ ) was added and radioactivity of the mixture was measured. The reaction vessel was heated at 100  $^\circ\text{C}$  for 5 min. After that, aqueous KOH solution (45 w%, 40  $\mu\text{L}$ ) was added, and the mixture was heated at 100  $^\circ\text{C}$  for 15 min. The reaction vessel was cooled down to room temperature and added MeCN (0.4 mL). The mixture was filtered through light silica cartridge and eluted with MeCN ( $2 \times 0.8$  mL). The radioactivity of the combined filtrate was measured to calculate the radiochemical yield. An aliquot from combined filtrate was removed and analyzed by radio TLC and HPLC for radiochemical purity and product identity. The radiochemical yield was corrected by the radiochemical purity, the lower one of radio TLC or HPLC.

| entry | PhCl      | Initial radio-activity | Collected radio-activity | Radio-TLC purity | Radio-HPLC purity | RCY |
|-------|-----------|------------------------|--------------------------|------------------|-------------------|-----|
| 1     | anhydrous | 203 $\mu\text{Ci}$     | 95 $\mu\text{Ci}$        | 95%              | 100%              | 45% |
| 2     | anhydrous | 343 $\mu\text{Ci}$     | 175 $\mu\text{Ci}$       | 100%             | 100%              | 51% |
| 3     | anhydrous | 293 $\mu\text{Ci}$     | 152 $\mu\text{Ci}$       | 99%              | 100%              | 51% |

**RCY** =  $49 \pm 3\%$  ( $n = 3$ )

| entry | PhCl            | Initial radio-activity | Collected radio-activity | Radio-TLC purity | Radio-HPLC purity | RCY |
|-------|-----------------|------------------------|--------------------------|------------------|-------------------|-----|
| 1     | water saturated | 478 $\mu\text{Ci}$     | 234 $\mu\text{Ci}$       | 100%             | 100%              | 49% |
| 2     | water saturated | 551 $\mu\text{Ci}$     | 266 $\mu\text{Ci}$       | 95%              | 91%               | 44% |
| 3     | water saturated | 490 $\mu\text{Ci}$     | 235 $\mu\text{Ci}$       | 99%              | 100%              | 47% |

**RCY** =  $47 \pm 2\%$  ( $n = 3$ )

Radio HPLC chromatogram:

Column: Luna 5u C18 100  $\text{\AA}$  250  $\times$  4.6 mm

Mobile phase: 60%  $\text{CH}_3\text{CN}$ , 40% 0.1 M  $\text{NH}_4\cdot\text{HCO}_2$  (aq)

Flow rate: 1 mL/min

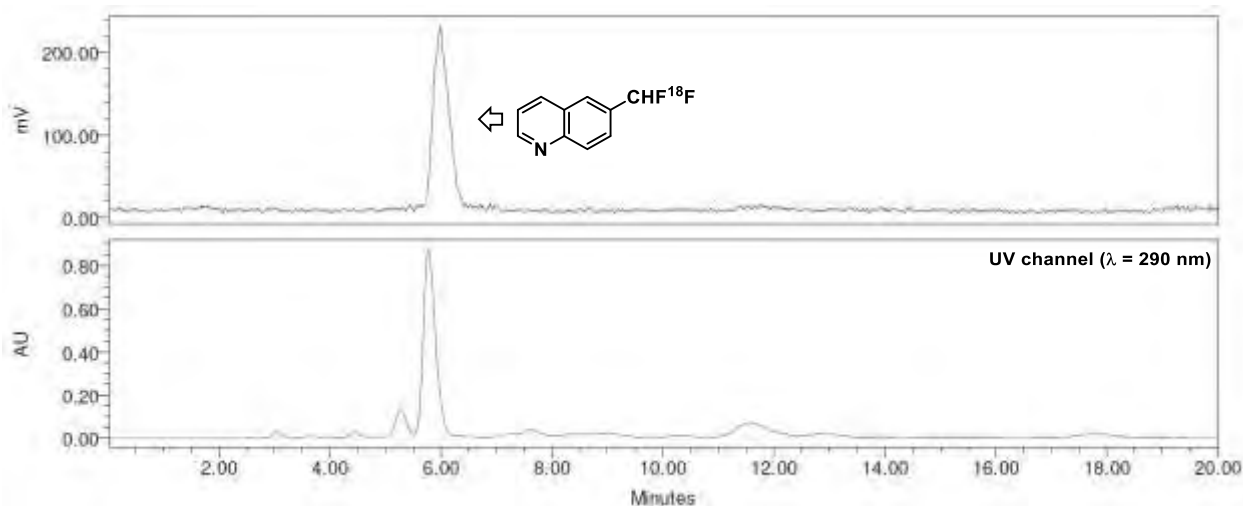

Figure S14. Co-injection radio HPLC chromatogram of [ $^{18}\text{F}$ ]3m

### [ $^{18}\text{F}$ ]5-Difluoromethyl-2-methylbenzo[d]thiazole ([ $^{18}\text{F}$ ]3n)

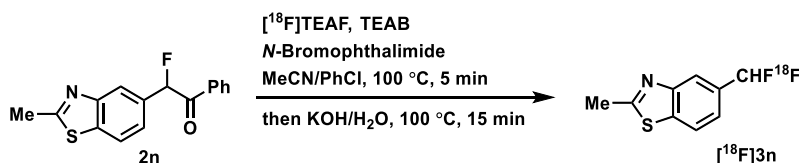

To a 1-dram (4 mL) glass vial containing TEAB (3.0 mg), precursor **2n** (2.9 mg, 10  $\mu\text{mol}$ ) and *N*-bromophthalimide (2.0 mg) was added chlorobenzene (0.2 mL). Then solution A (20  $\mu\text{L}$ ) was added and radioactivity of the mixture was measured. The reaction vessel was heated at 100  $^{\circ}\text{C}$  for 5 min. After that, aqueous KOH solution (45 w%, 40  $\mu\text{L}$ ) was added, and the mixture was heated at 100  $^{\circ}\text{C}$  for 15 min. The reaction vessel was cooled down to room temperature and added MeCN (0.4 mL). The mixture was filtered through light silica cartridge and eluted with MeCN (2  $\times$  0.8 mL). The radioactivity of the combined filtrate was measured to calculate the radiochemical yield. An aliquot from combined filtrate was removed and analyzed by radio TLC and HPLC for radiochemical purity and product identity. The radiochemical yield was corrected by the radiochemical purity, the lower one of radio TLC or HPLC.

| entry | Initial radio-activity | Collected radio-activity | Radio-TLC purity | Radio-HPLC purity | RCY |
|-------|------------------------|--------------------------|------------------|-------------------|-----|
| 1     | 491 $\mu\text{Ci}$     | 195 $\mu\text{Ci}$       | 94%              | 95%               | 37% |
| 2     | 444 $\mu\text{Ci}$     | 173 $\mu\text{Ci}$       | 96%              | 97%               | 37% |
| 3     | 421 $\mu\text{Ci}$     | 160 $\mu\text{Ci}$       | 95%              | 95%               | 36% |

RCY = 37  $\pm$  1% ( $n = 3$ )

Radio HPLC chromatogram:

Column: Luna 5u C18 100  $\text{\AA}$  250  $\times$  4.6 mm

Mobile phase: 60%  $\text{CH}_3\text{CN}$ , 40% 0.1 M  $\text{NH}_4\cdot\text{HCO}_2$  (aq)

Flow rate: 1 mL/min



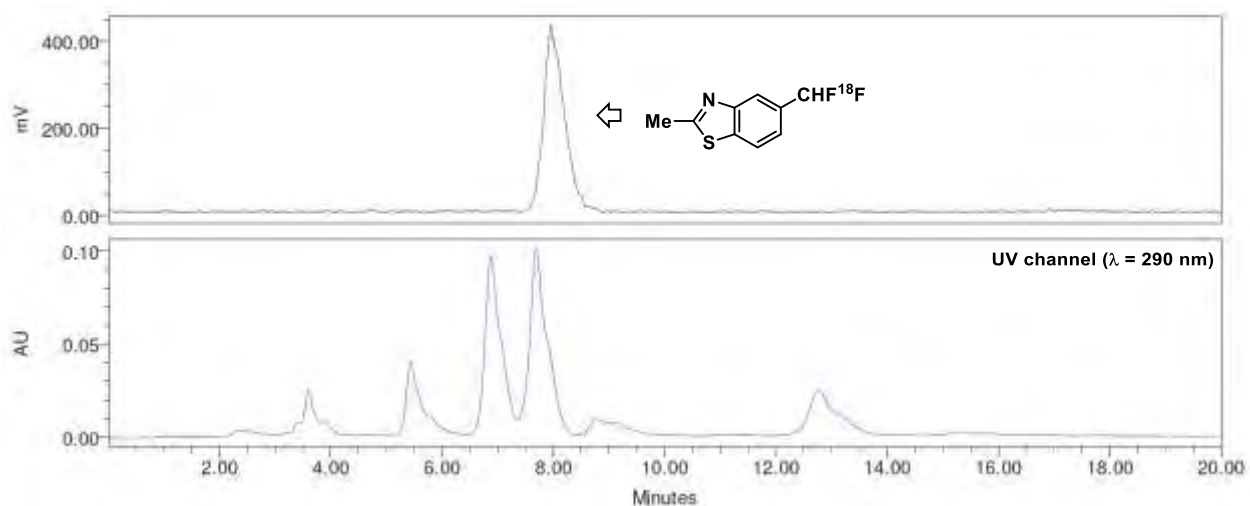

Figure S15. Co-injection radio HPLC chromatogram of [ $^{18}\text{F}$ ]3n

### [ $^{18}\text{F}$ ]3-Difluoromethylpyridine ([ $^{18}\text{F}$ ]3o)

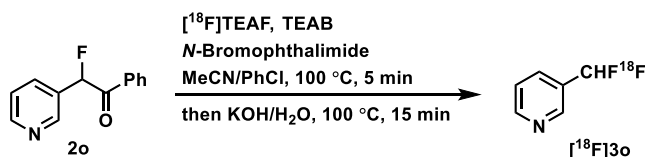

To a 1-dram (4 mL) glass vial containing TEAB (3.0 mg), precursor **2o** (2.2 mg, 10  $\mu\text{mol}$ ) and *N*-bromophthalimide (2 mg) was added chlorobenzene (0.2 mL). Then solution A (20  $\mu\text{L}$ ) was added and radioactivity of the mixture was measured. The reaction vessel was heated at 100  $^{\circ}\text{C}$  for 5 min. After that, aqueous KOH solution (45 w%, 40  $\mu\text{L}$ ) was added, and the mixture was heated at 100  $^{\circ}\text{C}$  for 15 min. The reaction vessel was cooled down to room temperature and added MeCN (0.4 mL). The mixture was filtered through light silica cartridge and eluted with MeCN ( $2 \times 0.8$  mL). The radioactivity of the combined filtrate was measured to calculate the radiochemical yield. An aliquot from combined filtrate was removed and analyzed by radio TLC and HPLC for radiochemical purity and product identity. The radiochemical yield was corrected by the radiochemical purity, the lower one of radio TLC or HPLC.

| entry | Initial radio-activity | Collected radio-activity | Radio-TLC purity | Radio-HPLC purity | RCY |
|-------|------------------------|--------------------------|------------------|-------------------|-----|
| 1     | 465 $\mu\text{Ci}$     | 212 $\mu\text{Ci}$       | 99%              | 100%              | 45% |
| 2     | 524 $\mu\text{Ci}$     | 200 $\mu\text{Ci}$       | 99%              | 100%              | 38% |
| 3     | 640 $\mu\text{Ci}$     | 244 $\mu\text{Ci}$       | 99%              | 100%              | 38% |

RCY =  $40 \pm 3\%$  ( $n = 3$ )

Radio HPLC chromatogram:

Column: Luna 5u C18 100  $\text{\AA}$  250  $\times$  4.6 mm

Mobile phase: 30%  $\text{CH}_3\text{CN}$ , 70% 0.1 M  $\text{NH}_4\cdot\text{HCO}_2$  (aq)

Flow rate: 1 mL/min

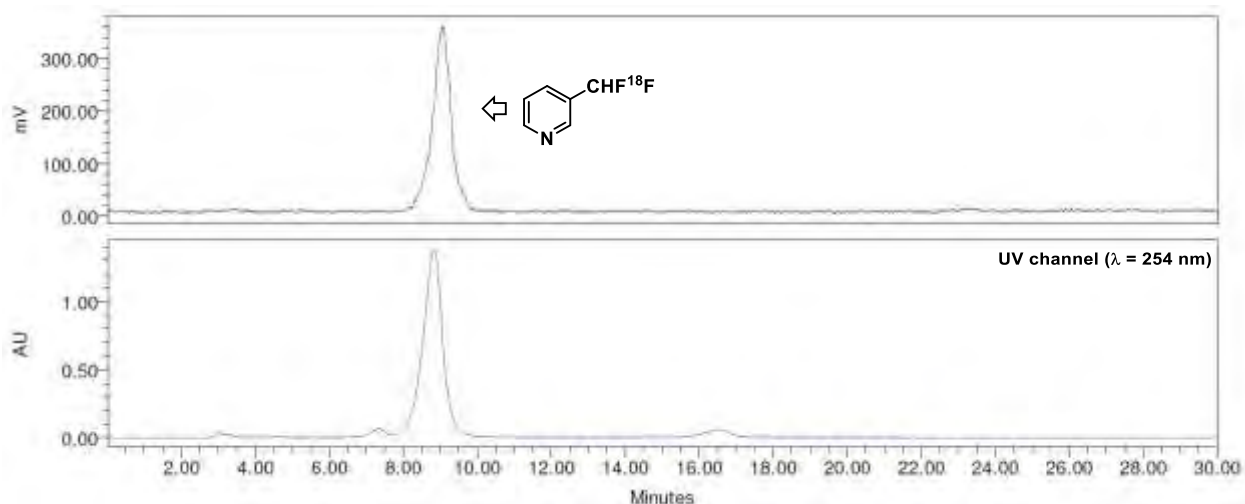

**Figure S16.** Co-injection radio HPLC chromatogram of [<sup>18</sup>F]3o

The radioactivity balance of <sup>18</sup>F-labeling was measured. No significant volatile byproducts were detected.

| entry | Initial radio-activity (t=0 min) | [ <sup>18</sup> F]3o | Radioactivity remained in vial, cartridge and syringe | Total measured radioactivity | Activity decay-corrected to t=0 min |
|-------|----------------------------------|----------------------|-------------------------------------------------------|------------------------------|-------------------------------------|
| 1     | 140 μCi                          | 58 μCi               | 60 μCi                                                | 118 μCi                      | 138 μCi                             |
| 2     | 744 μCi                          | 268 μCi              | 362 μCi                                               | 630 μCi                      | 738 μCi                             |
| 3     | 671 μCi                          | 249 μCi              | 318 μCi                                               | 567 μCi                      | 664 μCi                             |

### [<sup>18</sup>F]3-Difluoromethylquinoline ([<sup>18</sup>F]3p)

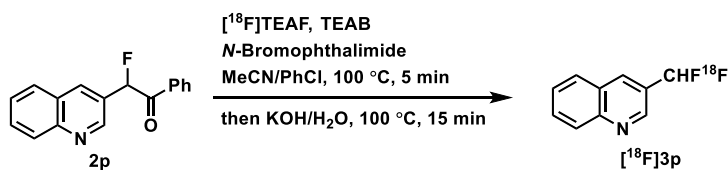

To a 1-dram (4 mL) glass vial containing TEAB (3.0 mg), precursor **2p** (2.7 mg, 10 μmol) and *N*-bromophthalimide (2.0 mg) was added chlorobenzene (0.2 mL). Then solution A (20 μL) was added and radioactivity of the mixture was measured. The reaction vessel was heated at 100 °C for 5 min. After that, aqueous KOH solution (45 w%, 40 μL) was added, and the mixture was heated at 100 °C for 15 min. The reaction vessel was cooled down to room temperature and added MeCN (0.4 mL). The mixture was filtered through light silica cartridge and eluted with MeCN (2 × 0.8 mL). The radioactivity of the combined filtrate was measured to calculate the radiochemical yield. An aliquot from combined filtrate was removed and analyzed by radio TLC and HPLC for radiochemical purity and product identity. The radiochemical yield was corrected by the radiochemical purity, the lower one of radio TLC or HPLC.

| entry | Initial radio-activity | Collected radio-activity | Radio-TLC purity | Radio-HPLC purity | RCY |
|-------|------------------------|--------------------------|------------------|-------------------|-----|
| 1     | 209 $\mu$ Ci           | 109 $\mu$ Ci             | 99%              | 100%              | 52% |
| 2     | 214 $\mu$ Ci           | 100 $\mu$ Ci             | 99%              | 100%              | 46% |
| 3     | 215 $\mu$ Ci           | 95 $\mu$ Ci              | 100%             | 100%              | 44% |

RCY =  $47 \pm 3\%$  ( $n = 3$ )

Radio HPLC chromatogram:

Column: Luna 5u C18 100 Å 250 × 4.6 mm

Mobile phase: 50% CH<sub>3</sub>CN, 50% 0.1 M NH<sub>4</sub>·HCO<sub>2</sub> (aq)

Flow rate: 1 mL/min

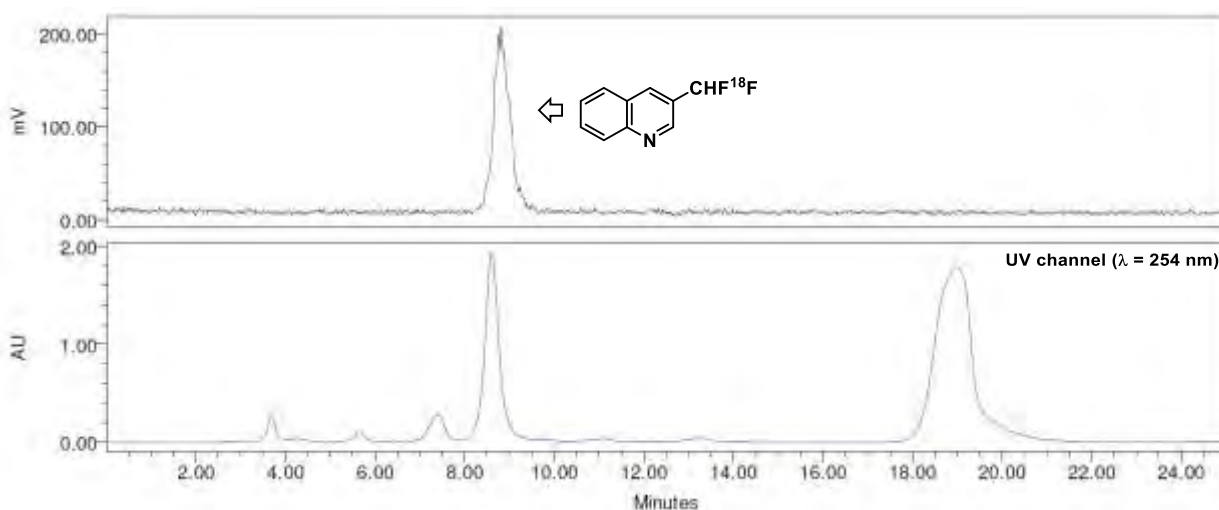

Figure S17. Co-injection radio HPLC chromatogram of [<sup>18</sup>F]3p

### [<sup>18</sup>F]Difluoromethyl-fenofibrate

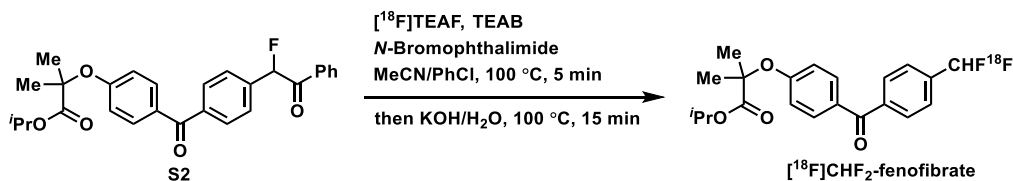

To a 1-dram (4 mL) glass vial containing TEAB (3.0 mg), precursor **S2** (4.6 mg, 10  $\mu$ mol) and *N*-bromophthalimide (2.0 mg) was added chlorobenzene (0.2 mL). Then solution A (20  $\mu$ L) was added and radioactivity of the mixture was measured. The reaction vessel was heated at 100 °C for 5 min. After that, aqueous KOH solution (45 w%, 40  $\mu$ L) was added, and the mixture was heated at 100 °C for 15 min. The reaction vessel was cooled down to room temperature and added MeCN (0.4 mL). The mixture was filtered through light silica cartridge and eluted with MeCN ( $2 \times 0.8$  mL). The radioactivity of the combined filtrate was measured to calculate the radiochemical yield. An aliquot from combined filtrate was removed and analyzed by radio TLC and HPLC for radiochemical purity and product identity. The radiochemical yield was corrected by the radiochemical purity, the lower one of radio TLC or HPLC.

| entry | Initial radio-activity | Collected radio-activity | Radio-TLC purity | Radio-HPLC purity | RCY |
|-------|------------------------|--------------------------|------------------|-------------------|-----|
| 1     | 554 $\mu$ Ci           | 285 $\mu$ Ci             | 100%             | 100%              | 51% |
| 2     | 489 $\mu$ Ci           | 216 $\mu$ Ci             | 100%             | 100%              | 44% |
| 3     | 602 $\mu$ Ci           | 270 $\mu$ Ci             | 100%             | 100%              | 45% |

RCY =  $47 \pm 3\%$  ( $n = 3$ )

Radio HPLC chromatogram:

Column: Luna 5u C18 100 Å 250 × 4.6 mm

Mobile phase: 70% CH<sub>3</sub>CN, 30% 0.1 M NH<sub>4</sub>·HCO<sub>2</sub> (aq)

Flow rate: 1 mL/min

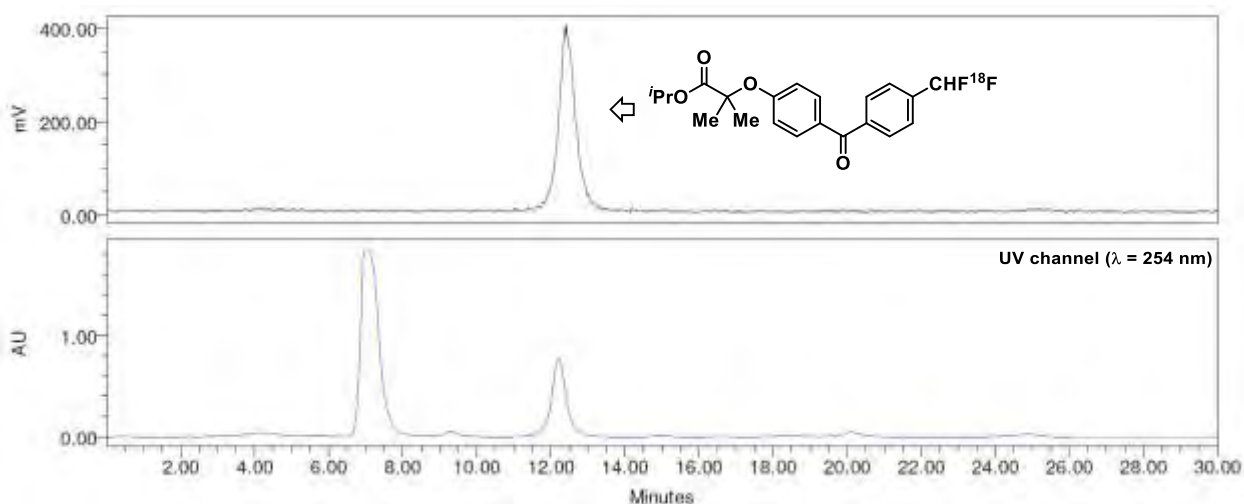

Figure S18. Co-injection radio HPLC chromatogram of [<sup>18</sup>F]CHF<sub>2</sub>-fenofibrate

### [<sup>18</sup>F]Difluoromethyl-DAA1106

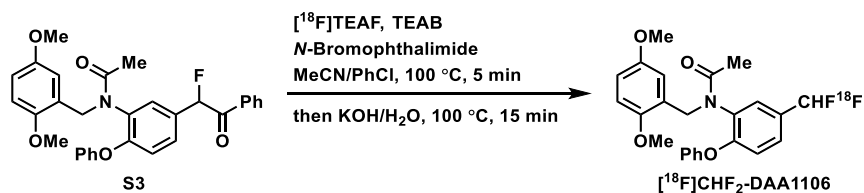

To a 1-dram (4 mL) glass vial containing TEAB (3.0 mg), precursor **S3** (5.1 mg, 10  $\mu$ mol) and *N*-bromophthalimide (2.0 mg) was added chlorobenzene (0.2 mL). Then solution A (20  $\mu$ L) was added and radioactivity of the mixture was measured. The reaction vessel was heated at 100 °C for 5 min. After that, aqueous KOH solution (45 w%, 40  $\mu$ L) was added, and the mixture was heated at 100 °C for 15 min. The reaction vessel was cooled down to room temperature and added MeCN (0.4 mL). The mixture was filtered through light silica cartridge and eluted with MeCN (2 × 0.8 mL). The radioactivity of the combined filtrate was measured to calculate the radiochemical yield. An aliquot from combined filtrate was removed and analyzed by radio TLC and HPLC for radiochemical purity and product identity. The radiochemical yield was corrected by the radiochemical purity, the lower one of radio TLC or HPLC.

| entry | Initial radio-activity | Collected radio-activity | Radio-TLC purity | Radio-HPLC purity | RCY |
|-------|------------------------|--------------------------|------------------|-------------------|-----|
| 1     | 542 $\mu$ Ci           | 171 $\mu$ Ci             | 100%             | 96%               | 30% |
| 2     | 498 $\mu$ Ci           | 215 $\mu$ Ci             | 97%              | 98%               | 42% |
| 3     | 442 $\mu$ Ci           | 158 $\mu$ Ci             | 99%              | 100%              | 35% |

RCY =  $36 \pm 5\%$  ( $n = 3$ )

Radio HPLC chromatogram:

Column: Luna 5u C18 100 Å 250 × 4.6 mm

Mobile phase: 60% CH<sub>3</sub>CN, 40% 0.1 M NH<sub>4</sub>·HCO<sub>2</sub> (aq)

Flow rate: 1 mL/min

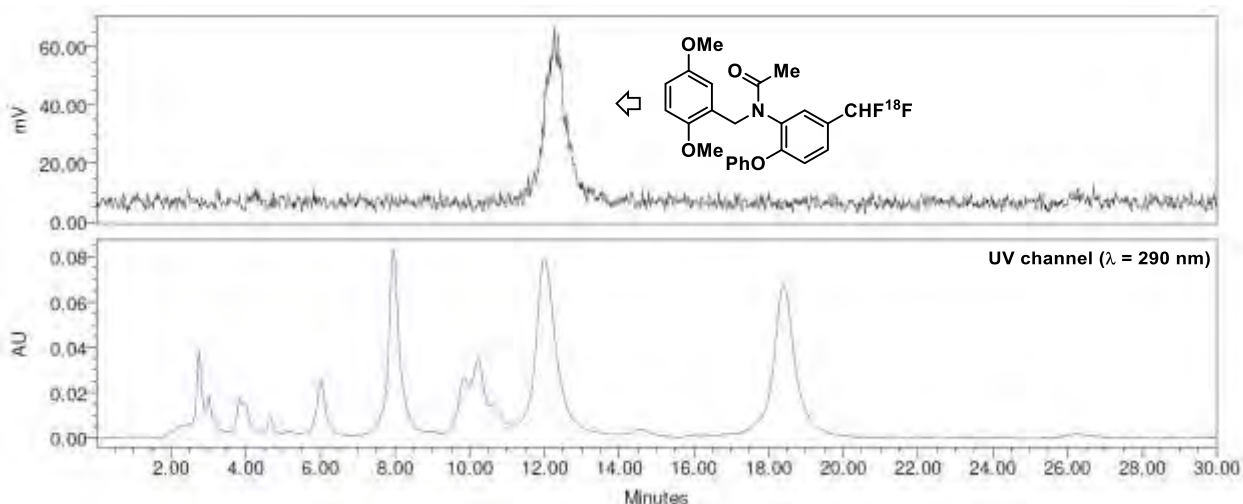

Figure S19. Co-injection radio HPLC chromatogram of [<sup>18</sup>F]CHF<sub>2</sub>-DAA1106

### [<sup>18</sup>F]Difluoromethyl-estrone

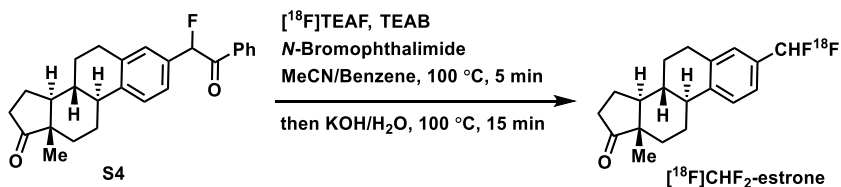

To a 1-dram (4 mL) glass vial containing TEAB (3.0 mg), precursor **S4** (3.9 mg, 10  $\mu$ mol) and *N*-bromophthalimide (2 mg) was added benzene (0.2 mL). Then solution A (20  $\mu$ L) was added and radioactivity of the mixture was measured. The reaction vessel was heated at 100 °C for 5 min. After that, aqueous KOH solution (45 w%, 60  $\mu$ L) was added, and the mixture was heated at 100 °C for 15 min. The reaction vessel was cooled down to room temperature and added MeCN (0.4 mL). The mixture was filtered through light silica cartridge and eluted with MeCN (2 × 0.8 mL). The radioactivity of the combined filtrate was measured to calculate the radiochemical yield. An aliquot from combined filtrate was removed and analyzed by radio TLC and HPLC for radiochemical purity and product identity. The radiochemical yield was corrected by the radiochemical purity, the lower one of radio TLC or HPLC.

| entry | Initial radio-activity | Collected radio-activity | Radio-TLC purity | Radio-HPLC purity | RCY |
|-------|------------------------|--------------------------|------------------|-------------------|-----|
| 1     | 616 $\mu$ Ci           | 122 $\mu$ Ci             | 94%              | 60%               | 12% |
| 2     | 643 $\mu$ Ci           | 130 $\mu$ Ci             | 94%              | 53%               | 11% |
| 3     | 670 $\mu$ Ci           | 122 $\mu$ Ci             | 90%              | 55%               | 10% |

RCY =  $11 \pm 1\%$  ( $n = 3$ )

Radio HPLC chromatogram:

Column: Luna 5u C18 100 Å 250 × 4.6 mm

Mobile phase: 80% CH<sub>3</sub>CN, 20% 0.1 M NH<sub>4</sub>·HCO<sub>2</sub> (aq)

Flow rate: 1 mL/min

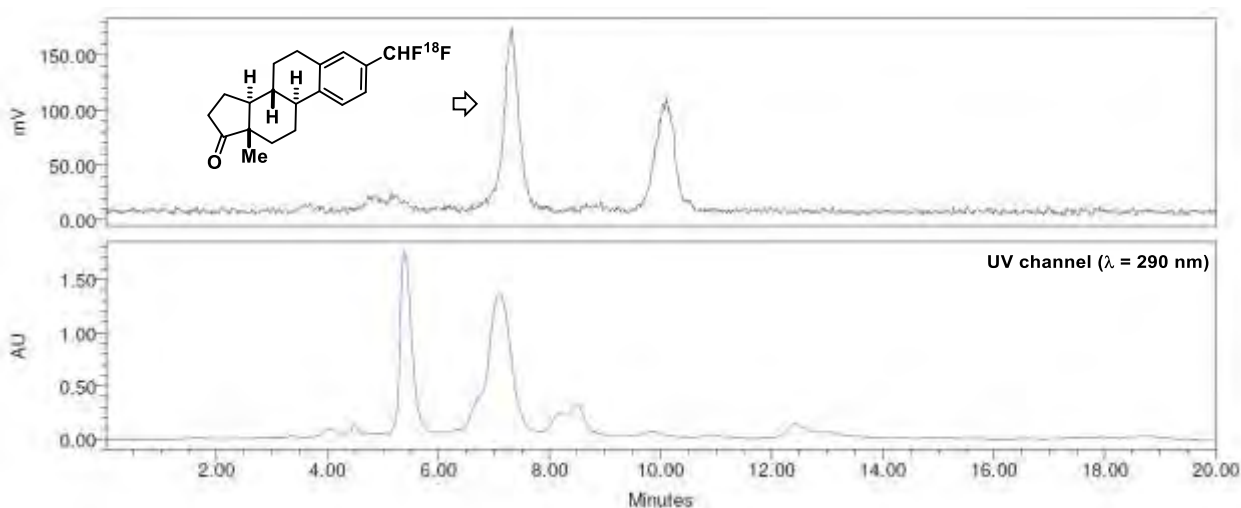

Figure S20. Co-injection radio HPLC chromatogram of [<sup>18</sup>F]CHF<sub>2</sub>-estrone

### [<sup>18</sup>F]Difluoromethyl-claritin

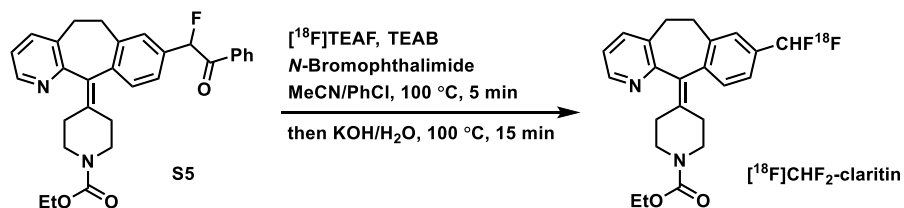

To a 1-dram (4 mL) glass vial containing TEAB (3.0 mg), precursor **S5** (4.8 mg, 10  $\mu$ mol) and *N*-bromophthalimide (2.0 mg) was added chlorobenzene (0.2 mL). Then solution A (20  $\mu$ L) was added and radioactivity of the mixture was measured. The reaction vessel was heated at 100 °C for 5 min. After that, aqueous KOH solution (45 w%, 60  $\mu$ L) was added, and the mixture was heated at 100 °C for 15 min. The reaction vessel was cooled down to room temperature and added MeCN (0.4 mL). The mixture was filtered through light silica cartridge and eluted with MeCN (2 × 0.8 mL). The radioactivity of the combined filtrate was measured to calculate the radiochemical yield. An aliquot from combined filtrate was removed and analyzed by radio TLC and HPLC for radiochemical purity and product identity. The radiochemical yield was corrected by the radiochemical purity, the lower one of radio TLC or HPLC.

| entry | Initial radio-activity | Collected radio-activity | Radio-TLC purity | Radio-HPLC purity | RCY |
|-------|------------------------|--------------------------|------------------|-------------------|-----|
| 1     | 515 $\mu$ Ci           | 190 $\mu$ Ci             | 94%              | 55%               | 20% |
| 2     | 729 $\mu$ Ci           | 243 $\mu$ Ci             | 98%              | 72%               | 24% |
| 3     | 647 $\mu$ Ci           | 173 $\mu$ Ci             | 98%              | 75%               | 20% |

RCY =  $21 \pm 2\%$  ( $n = 3$ )

Radio HPLC chromatogram:

Column: Luna 5u C18 100 Å 250 × 4.6 mm

Mobile phase: 60% CH<sub>3</sub>CN, 40% 0.1 M NH<sub>4</sub>·HCO<sub>2</sub> (aq)

Flow rate: 1 mL/min

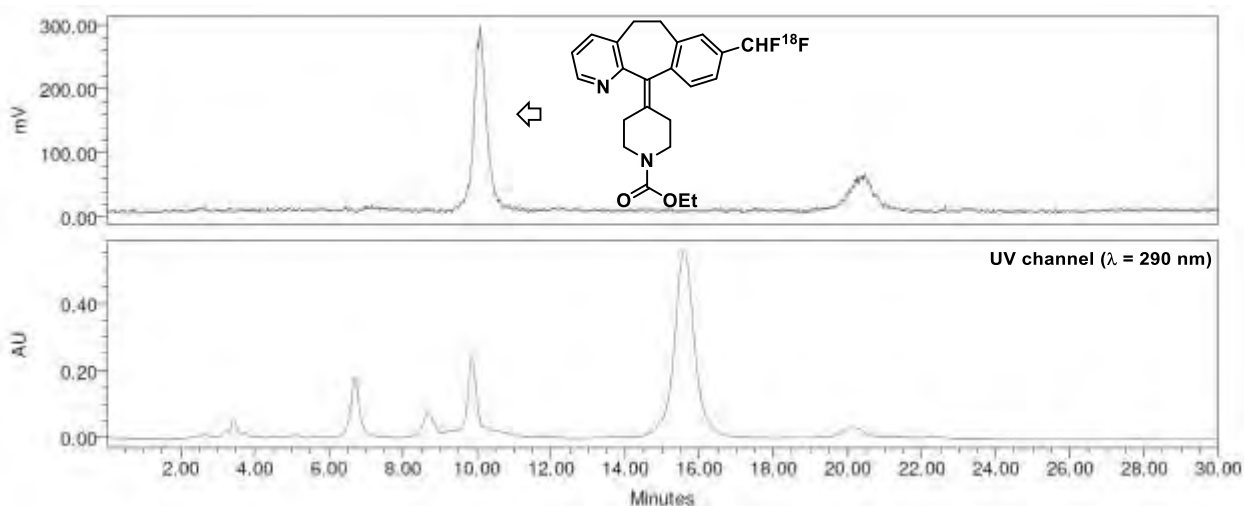

Figure S21. Co-injection radio HPLC chromatogram of [<sup>18</sup>F]CHF<sub>2</sub>-claritin

### [<sup>18</sup>F]Difluoromethyl-analepticon

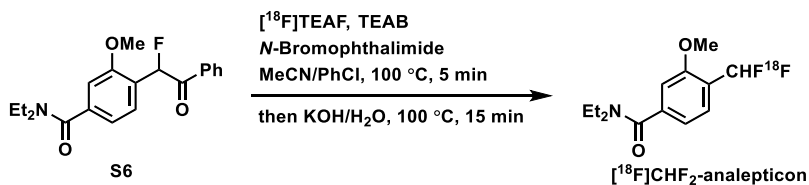

To a 1-dram (4 mL) glass vial containing TEAB (3.0 mg), precursor **S6** (3.4 mg, 10  $\mu$ mol) and *N*-bromophthalimide (2.0 mg) was added chlorobenzene (0.2 mL). Then solution A (20  $\mu$ L) was added and radioactivity of the mixture was measured. The reaction vessel was heated at 100 °C for 5 min. After that, aqueous KOH solution (45 w%, 40  $\mu$ L) was added, and the mixture was heated at 100 °C for 15 min. The reaction vessel was cooled down to room temperature and added MeCN (0.4 mL). The mixture was filtered through light silica cartridge and eluted with MeCN (2 × 0.8 mL). The radioactivity of the combined filtrate was measured to calculate the radiochemical yield. An aliquot from combined filtrate was removed and analyzed by radio TLC and HPLC for radiochemical purity and product identity. The radiochemical yield was corrected by the radiochemical purity, the lower one of radio TLC or HPLC.

| entry | Initial radio-activity | Collected radio-activity | Radio-TLC purity | Radio-HPLC purity | RCY |
|-------|------------------------|--------------------------|------------------|-------------------|-----|
| 1     | 880 $\mu\text{Ci}$     | 115 $\mu\text{Ci}$       | 99%              | 90%               | 12% |
| 2     | 885 $\mu\text{Ci}$     | 90.5 $\mu\text{Ci}$      | 98%              | 87%               | 9%  |
| 3     | 768 $\mu\text{Ci}$     | 98.4 $\mu\text{Ci}$      | 99%              | 86%               | 11% |

RCY =  $11 \pm 1\%$  ( $n = 3$ )

Radio HPLC chromatogram:

Column: Luna 5u C18 100 Å 250 × 4.6 mm

Mobile phase: 60% CH<sub>3</sub>CN, 40% 0.1 M NH<sub>4</sub>·HCO<sub>2</sub> (aq)

Flow rate: 1 mL/min

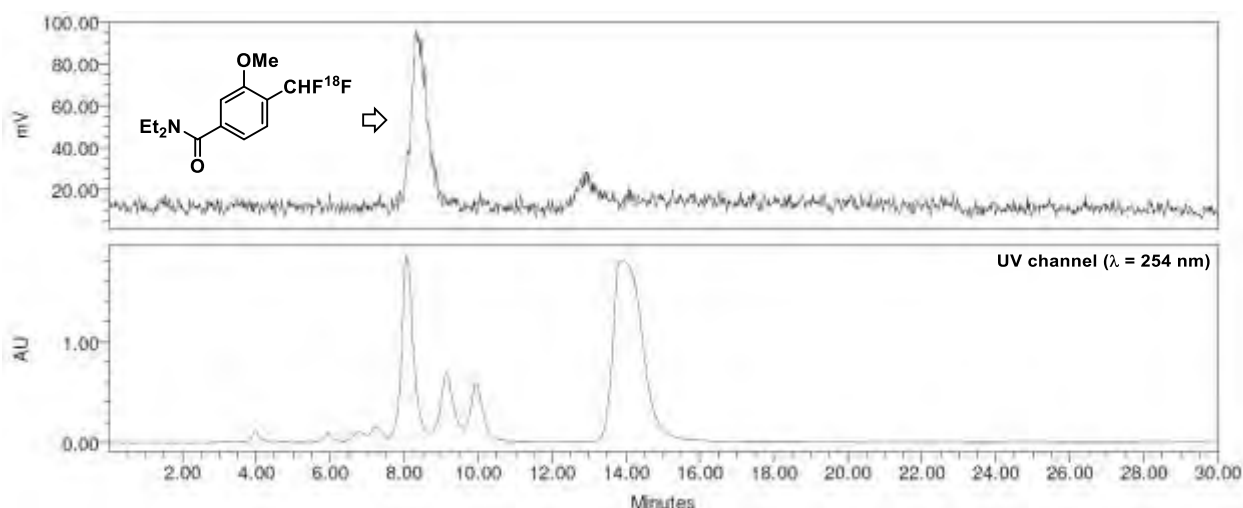

Figure S22. Co-injection radio HPLC chromatogram of [<sup>18</sup>F]CHF<sub>2</sub>-analepticon

### [<sup>18</sup>F]Difluoromethyl-fluoxetine

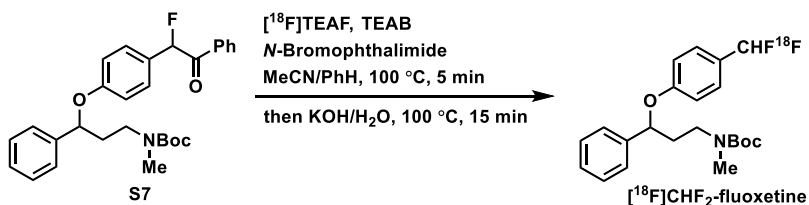

To a 1-dram (4 mL) glass vial containing TEAB (3.0 mg), precursor **S7** (4.6 mg, 10  $\mu\text{mol}$ ) and *N*-bromophthalimide (2.0 mg) was added benzene (0.2 mL). Then solution A (20  $\mu\text{L}$ ) was added and radioactivity of the mixture was measured. The reaction vessel was heated at 100 °C for 5 min. After that, aqueous KOH solution (45 w%, 60  $\mu\text{L}$ ) was added, and the mixture was heated at 100 °C for 15 min. The reaction vessel was cooled down to room temperature and added MeCN (0.4 mL). The mixture was filtered through light silica cartridge and eluted with MeCN (2 × 0.8 mL). The radioactivity of the combined filtrate was measured to calculate the radiochemical yield. An aliquot from combined filtrate was removed and analyzed by radio TLC and HPLC for radiochemical purity and product identity. The radiochemical yield was corrected by the radiochemical purity, the lower one of radio TLC or HPLC.



| entry | Initial radio-activity | Collected radio-activity | Radio-TLC purity | Radio-HPLC purity | RCY |
|-------|------------------------|--------------------------|------------------|-------------------|-----|
| 1     | 482 $\mu$ Ci           | 145 $\mu$ Ci             | 96%              | 65%               | 20% |
| 2     | 410 $\mu$ Ci           | 120 $\mu$ Ci             | 98%              | 60%               | 18% |
| 3     | 739 $\mu$ Ci           | 175 $\mu$ Ci             | 96%              | 58%               | 14% |

RCY =  $17 \pm 2\%$  ( $n = 3$ )

Radio HPLC chromatogram:

Column: Luna 5u C18 100 Å 250 × 4.6 mm

Mobile phase: 80% CH<sub>3</sub>CN, 20% 0.1 M NH<sub>4</sub>·HCO<sub>2</sub> (aq)

Flow rate: 1 mL/min

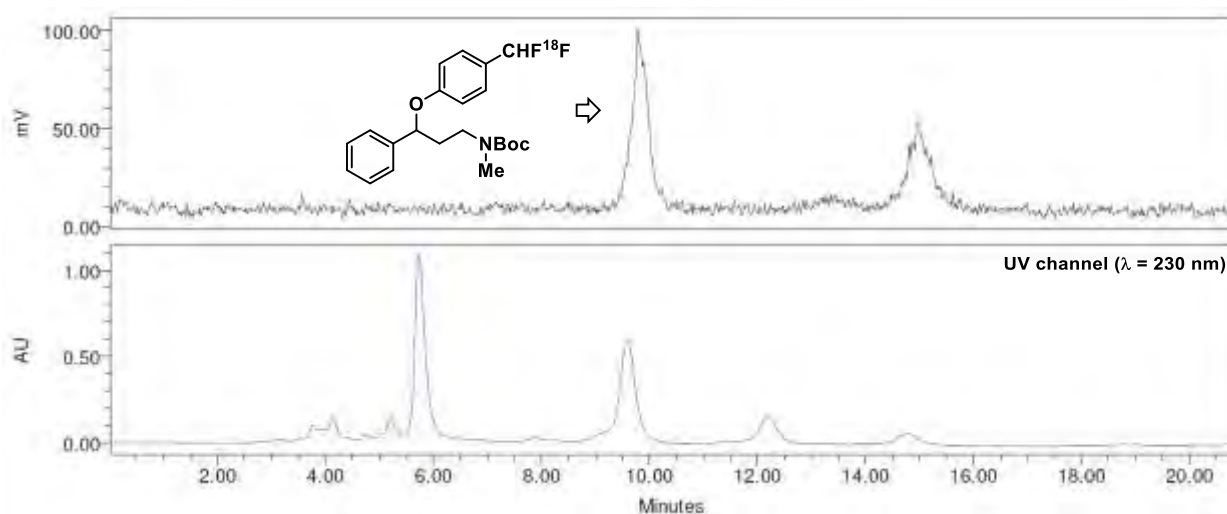

Figure S23. Co-injection radio HPLC chromatogram of [<sup>18</sup>F]CHF<sub>2</sub>-fluoxetine

### [<sup>18</sup>F]Difluoromethyl-SC-58125

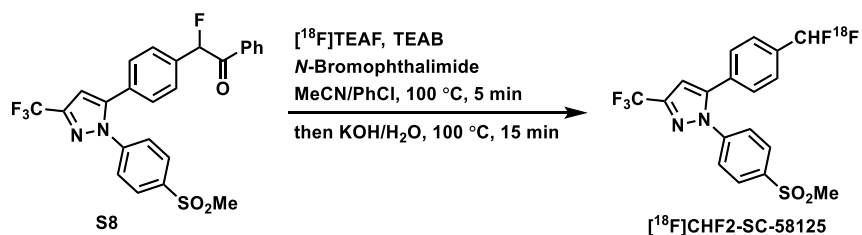

To a 1-dram (4 mL) glass vial containing TEAB (3.0 mg), precursor **S8** (5.0 mg, 10  $\mu$ mol) and *N*-bromophthalimide (2.0 mg) was added chlorobenzene (0.2 mL). Then solution A (20  $\mu$ L) was added and radioactivity of the mixture was measured. The reaction vessel was heated at 100 °C for 5 min. After that, aqueous KOH solution (45 w%, 40  $\mu$ L) was added, and the mixture was heated at 100 °C for 15 min. The reaction vessel was cooled down to room temperature and added MeCN (0.4 mL). The mixture was filtered through light silica cartridge and eluted with MeCN (2 × 0.8 mL). The radioactivity of the combined filtrate was measured to calculate the radiochemical yield. An aliquot from combined filtrate was removed and analyzed by radio TLC and HPLC for radiochemical yield, purity and product identity respectively. The

radiochemical yield was corrected by the radiochemical purity, the lower one of radio TLC or HPLC.

| entry | Initial radio-activity | Collected radio-activity | Radio-TLC purity | Radio-HPLC purity | RCY |
|-------|------------------------|--------------------------|------------------|-------------------|-----|
| 1     | 770 $\mu$ Ci           | 379 $\mu$ Ci             | 99%              | 100%              | 49% |
| 2     | 732 $\mu$ Ci           | 346 $\mu$ Ci             | 99%              | 100%              | 47% |
| 3     | 700 $\mu$ Ci           | 315 $\mu$ Ci             | 99%              | 100%              | 45% |

RCY =  $47 \pm 2\%$  ( $n = 3$ )

Radio HPLC chromatogram:

Column: Luna 5u C18 100 Å 250 × 4.6 mm

Mobile phase: 70% CH<sub>3</sub>CN, 30% 0.1 M NH<sub>4</sub>·HCO<sub>2</sub> (aq)

Flow rate: 1 mL/min

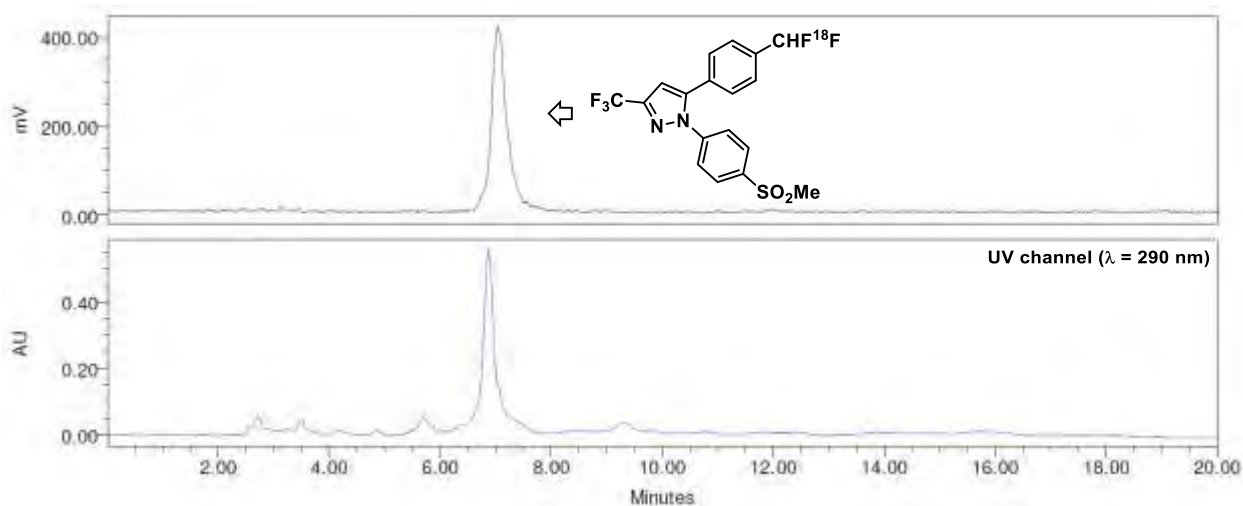

Figure S24. Co-injection radio HPLC chromatogram of [<sup>18</sup>F]CHF<sub>2</sub>-SC-58125

### [<sup>18</sup>F]4-Morpholinomethyl-difluoromethylbenzene ([<sup>18</sup>F]3q)

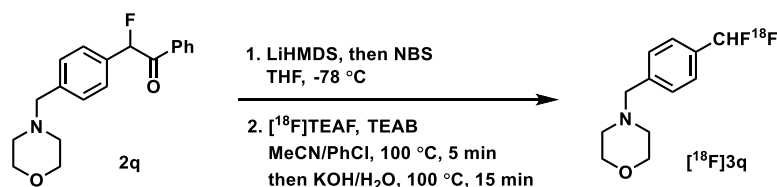

Compound **2q** (mg, 10  $\mu$ mol, 1.0 equiv.) was dissolved in dry THF (0.25 mL). LiHMDS (1.0 M in THF, 12  $\mu$ L, 12  $\mu$ mol, 1.2 equiv.) was added at  $-78$  °C, and then the reaction mixture was stirred for 45 min. A solution of NBS (1.8 mg, 10  $\mu$ mol, 1.0 equiv.) in THF (0.1 mL) was added. The reaction mixture was stirred at  $-78$  °C for 45 min, and evaporated under vacuum at room temperature. Toluene (0.4 mL) was added and the mixture was filtered through glass microfibre into a 1-dram (4 mL) glass vial and eluted with toluene ( $2 \times 0.4$  mL). The filtrate was evaporated under reduced pressure. TEAB (3.0 mg) and chlorobenzene (0.2 mL) were added into the vial. Then solution A (20  $\mu$ L) was added and radioactivity of the mixture was measured. The reaction vessel was heated at 100 °C for 5 min. After that, aqueous KOH solution (45 w%, 40  $\mu$ L) was added,

and the mixture was heated at 100 °C for 15 min. The reaction vessel was cooled down to room temperature and added MeCN (0.4 mL). The mixture was filtered through light silica cartridge and eluted with MeCN (2 × 0.8 mL). The radioactivity of the combined filtrate was measured to calculate the radiochemical yield. An aliquot from combined filtrate was removed and analyzed by radio TLC and HPLC for radiochemical yield, purity and product identity respectively. The radiochemical yield was corrected by the radiochemical purity, the lower one of radio TLC or HPLC.

| entry | Initial radio-activity | Collected radio-activity | Radio-TLC purity | Radio-HPLC purity | RCY |
|-------|------------------------|--------------------------|------------------|-------------------|-----|
| 1     | 765 $\mu$ Ci           | 205 $\mu$ Ci             | 90%              | 75%               | 20% |
| 2     | 802 $\mu$ Ci           | 202 $\mu$ Ci             | 93%              | 72%               | 18% |
| 3     | 642 $\mu$ Ci           | 163 $\mu$ Ci             | 91%              | 71%               | 18% |

RCY = 19  $\pm$  1% ( $n$  = 3)

Radio HPLC chromatogram:

Column: Luna 5u C18 100 Å 250 × 4.6 mm

Mobile phase: 60% CH<sub>3</sub>CN, 40% 0.1 M NH<sub>4</sub>·HCO<sub>2</sub> (aq)

Flow rate: 1 mL/min

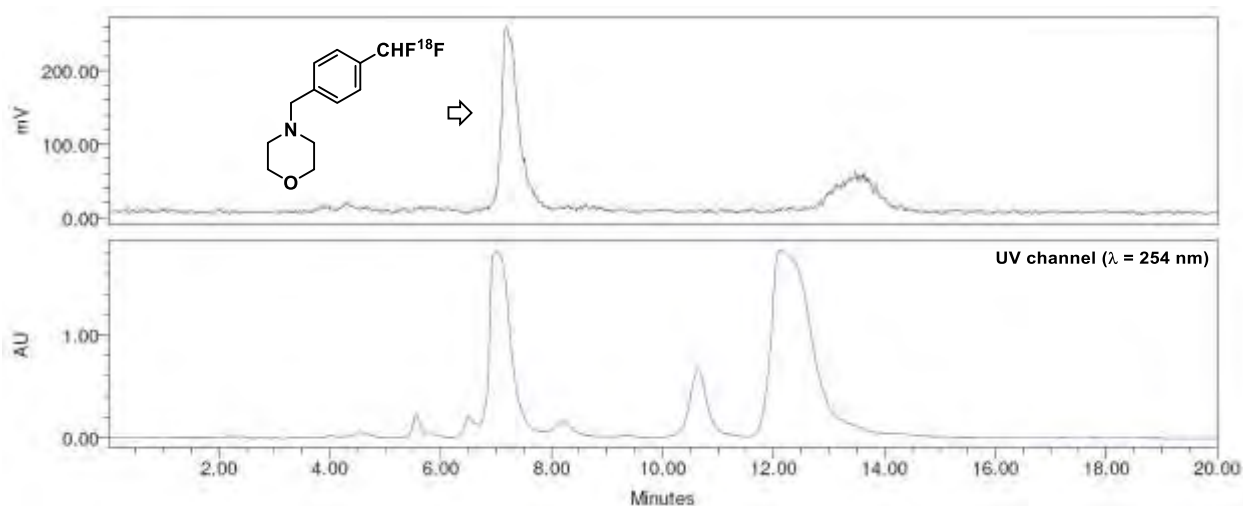

Figure S25. Co-injection radio HPLC chromatogram of [<sup>18</sup>F]3q

### [<sup>18</sup>F]Hydroquinidine 4-difluoromethylbenzoate

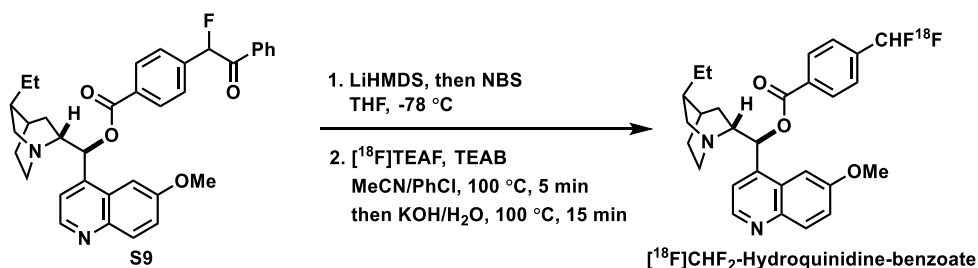

Compound **S9** (5.7 mg, 10  $\mu$ mol, 1.0 equiv.) was dissolved in dry THF (0.25 mL). LiHMDS (1.0 M in THF, 12

$\mu\text{L}$ , 12  $\mu\text{mol}$ , 1.2 equiv.) was added at  $-78\text{ }^\circ\text{C}$ , and then the reaction mixture was stirred for 45 min. A solution of NBS (1.8 mg, 10  $\mu\text{mol}$ , 1.0 equiv.) in THF (0.1 mL) was added. The reaction mixture was stirred at  $-78\text{ }^\circ\text{C}$  for 45 min, and evaporated under vacuum at room temperature. Toluene (0.4 mL) was added and the mixture was filtered through glass microfibre into a 1-dram (4 mL) glass vial and eluted with toluene ( $2 \times 0.4\text{ mL}$ ). The filtrate was evaporated under reduced pressure. TEAB (3.0 mg) and chlorobenzene (0.2 mL) were added into the vial. Then solution A (20  $\mu\text{L}$ ) was added and radioactivity of the mixture was measured. The reaction vessel was heated at  $100\text{ }^\circ\text{C}$  for 5 min. After that, aqueous KOH solution (45 w%, 40  $\mu\text{L}$ ) was added, and the mixture was heated at  $100\text{ }^\circ\text{C}$  for 15 min. The reaction vessel was cooled down to room temperature and added MeCN (0.4 mL). The mixture was filtered through light silica cartridge and eluted with MeCN ( $2 \times 0.8\text{ mL}$ ). The radioactivity of the combined filtrate was measured to calculate the radiochemical yield. An aliquot from combined filtrate was removed and analyzed by radio TLC and HPLC for radiochemical yield, purity and product identity respectively. The radiochemical yield was corrected by the radiochemical purity, the lower one of radio TLC or HPLC.

| entry | Initial radio-activity | Collected radio-activity | Radio-TLC purity | Radio-HPLC purity | RCY |
|-------|------------------------|--------------------------|------------------|-------------------|-----|
| 1     | 636 $\mu\text{Ci}$     | 214 $\mu\text{Ci}$       | 90%              | 95%               | 30% |
| 2     | 571 $\mu\text{Ci}$     | 147 $\mu\text{Ci}$       | 88%              | 90%               | 23% |
| 3     | 544 $\mu\text{Ci}$     | 166 $\mu\text{Ci}$       | 85%              | 91%               | 26% |

RCY =  $26 \pm 3\%$  ( $n = 3$ )

Radio HPLC chromatogram:

Column: Luna 5u C18 100  $\text{\AA}$  250  $\times$  4.6 mm

Mobile phase: 60%  $\text{CH}_3\text{CN}$ , 40% 0.1 M  $\text{NH}_4\cdot\text{HCO}_2$  (aq)

Flow rate: 1 mL/min

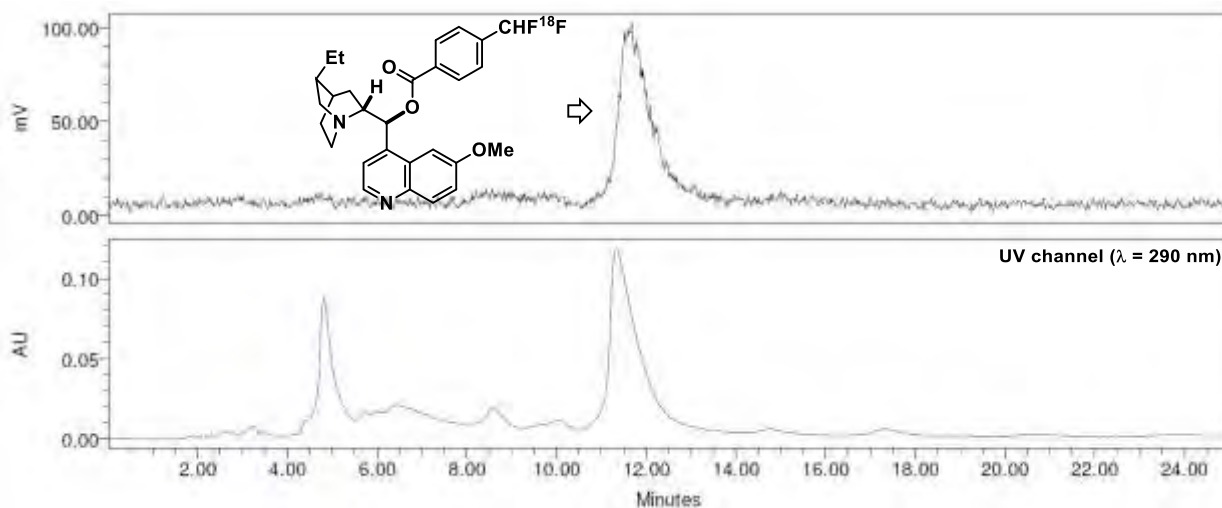

Figure S26. Co-injection radio HPLC chromatogram of  $[^{18}\text{F}]\text{CHF}_2$ -hydroquinidine-benzoate

### HPLC Separation

$[^{18}\text{F}]\text{Fluoride}$  was prepared for radiofluorination by the following method:  $^{18}\text{F}$ -fluoride aqueous solution was

loaded onto a Sep-Pak<sup>®</sup> QMA cartridge. The cartridge was eluted with a solution of tetraethylammonium bicarbonate (TEAB, 2 mg) in acetonitrile and water (1 mL, v/v 7:3). The [<sup>18</sup>F]TEAF/TEAB solution was collected in a V-shaped vial and sealed with a teflon-lined septum. The vial was heated to 110 °C while nitrogen gas was passed through a P<sub>2</sub>O<sub>5</sub>-Drierite<sup>™</sup> column followed by a vented needle. When no liquid was visible in the vial, it was removed from heat, anhydrous acetonitrile (1 mL) was added, and the heating was resumed until dryness. This step was repeated an additional two times. The vial was then cooled down to room temperature under nitrogen flow (10 mL/min). The contents were redissolved in the anhydrous acetonitrile (20 μL, solution B).

To a 1-dram (4 mL) glass vial containing TEAB (1.5 mg), precursor **2** (10 μmol) and *N*-bromophthalimide (2 mg) was added chlorobenzene (0.2 mL). Then solution B (20 μL) was added and radioactivity of the mixture was measured. The reaction vessel was heated at 100 °C for 5 min. After that, aqueous KOH solution (45 w%, 40 μL) was added, and the mixture was heated at 100 °C for 15 min. The reaction vessel was cooled to room temperature. The reaction mixture was loaded on a light silica cartridge. Hexane (0.5 mL) was added into the reaction vessel, and the formed mixture was used to wash the silica cartridge. The silica cartridge was dried by nitrogen gas for 10 seconds, and then eluted with MeCN (2 x 1 mL). 0.1 M NH<sub>4</sub>·HCO<sub>2</sub> aqueous solution (1 mL) was added into the combined MeCN filtrate, and the formed solution was subjected to purification by semi-preparative HPLC. The fraction corresponding to radiolabeled product was collected and was measured to calculate the radiochemical yield.

**Table S3**

| Compound                                     | Decay-corrected RCY (SPE) | Decay-corrected RCY (HPLC) |
|----------------------------------------------|---------------------------|----------------------------|
| [ <sup>18</sup> F]Difluoromethyl-SC-58125    | 55%                       | 51%                        |
| [ <sup>18</sup> F]6-Difluoromethylquinoline  | 57%                       | 57%                        |
| [ <sup>18</sup> F]Difluoromethyl-fenofibrate | 55%                       | 54%                        |

**[<sup>18</sup>F]6-Difluoromethylquinoline ([<sup>18</sup>F]3m)**

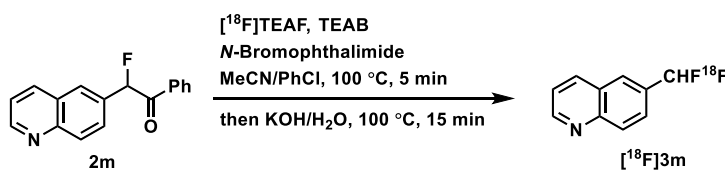

To a 1-dram (4 mL) glass vial containing TEAB (1.5 mg), precursor **2m** (10 μmol, 2.7 mg) and *N*-bromophthalimide (2 mg) was added chlorobenzene (0.2 mL). Then solution B (20 μL, 2.08 mCi) was added and radioactivity of the mixture was measured. The reaction vessel was heated at 100 °C for 5 min. After that, aqueous KOH solution (45 w%, 40 μL) was added, and the mixture was heated at 100 °C for 15 min. The reaction vessel was cooled to room temperature. The reaction mixture was loaded on a light silica cartridge. Hexane (0.5 mL) was added into the reaction vessel, and the formed mixture was used to wash the silica cartridge. The silica cartridge was dried by nitrogen gas for 10 seconds, and then eluted with MeCN

(2 x 1 mL). 0.1 M  $\text{NH}_4\cdot\text{HCO}_2$  aqueous solution (1 mL) was added into the combined MeCN filtrate, and the formed solution was subjected to purification by semi-preparative HPLC. The fraction corresponding to radiolabeled product was collected and was measured to contain 0.892 mCi.

| Initial radio-activity | $[^{18}\text{F}]\mathbf{3m}$ | RCY (HPLC) | Time in total | Decay-corrected RCY (HPLC) |
|------------------------|------------------------------|------------|---------------|----------------------------|
| 2.08 mCi               | 0.89 mCi                     | 43%        | 45 min        | 57%                        |

Radio HPLC chromatogram:

Column: XBridge Shield RP 18 3.5  $\mu\text{m}$  100 x 4.6 mm

Mobile phase: 25%  $\text{CH}_3\text{CN}$ , 75% 0.1 M  $\text{NH}_4\cdot\text{HCO}_2$  (aq)

Flow rate: 1 mL/min

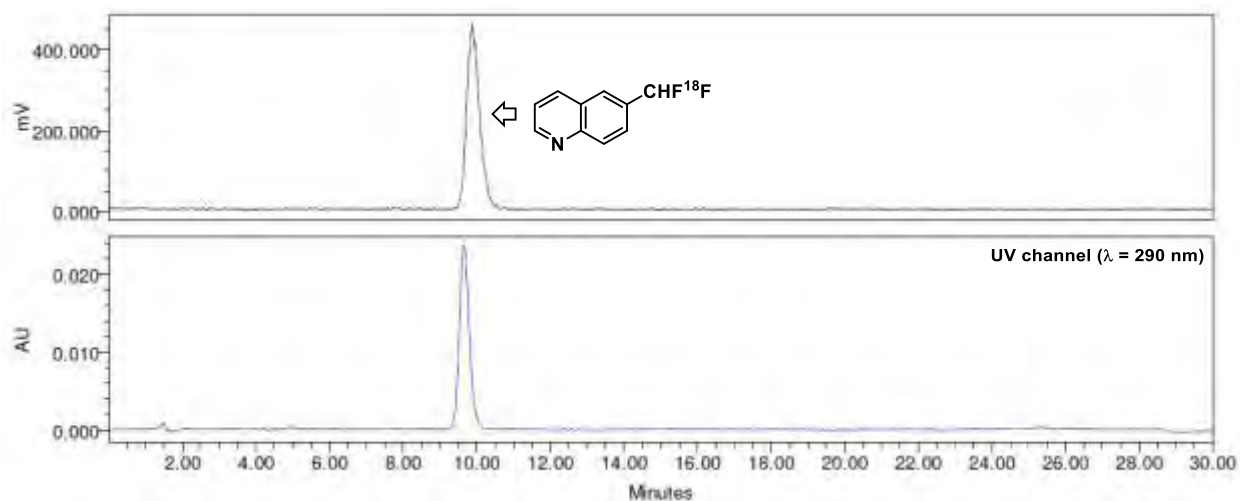

**Figure S27.** HPLC chromatogram (XBridge) of  $[^{18}\text{F}]\mathbf{6}$ -difluoromethylquinoline

Radio HPLC chromatogram:

Column: Synergi 4u Hydro-RP 80A 4  $\mu\text{m}$  150 x 4.6 mm

Mobile phase: 40%  $\text{CH}_3\text{CN}$ , 60% 0.1 M  $\text{NH}_4\cdot\text{HCO}_2$  (aq)

Flow rate: 1 mL/min

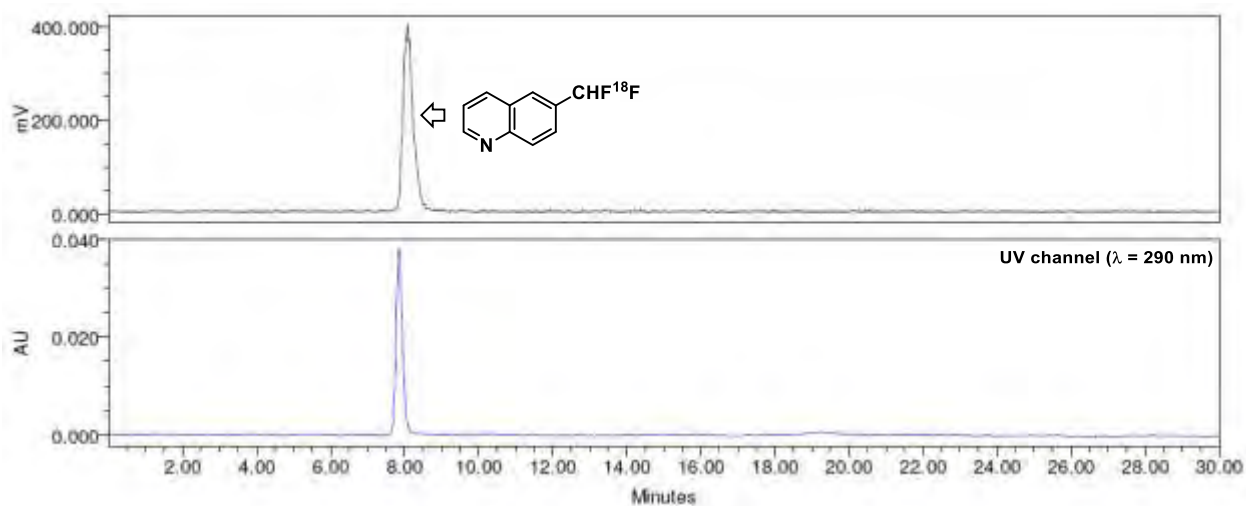

Figure S28. HPLC chromatogram (Synergi) of [ $^{18}\text{F}$ ]6-difluoromethylquinoline

Radio HPLC chromatogram:

Column: Luna 5u C18 100 Å 250 × 4.6 mm

Mobile phase: 50%  $\text{CH}_3\text{CN}$ , 50% 0.1 M  $\text{NH}_4\cdot\text{HCO}_2$  (aq)

Flow rate: 1 mL/min

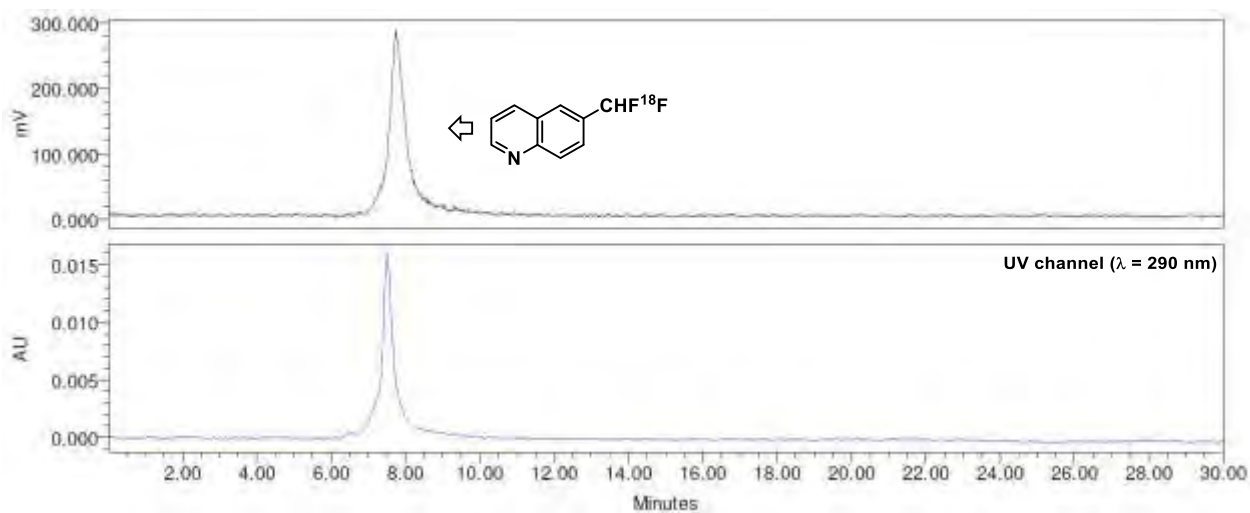

Figure S29. HPLC chromatogram (Luna) of [ $^{18}\text{F}$ ]6-difluoromethylquinoline

### [ $^{18}\text{F}$ ]Difluoromethyl-fenofibrate

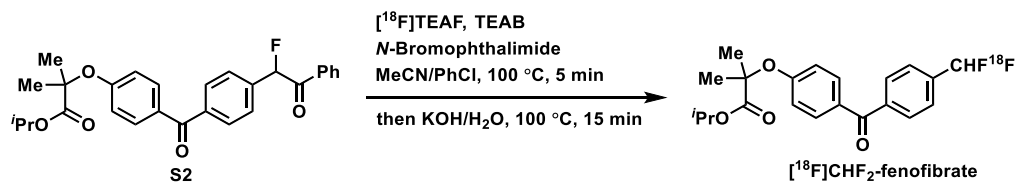

To a 1-dram (4 mL) glass vial containing TEAB (3.0 mg), precursor **S2** (10  $\mu\text{mol}$ , 4.6 mg) and *N*-bromophthalimide (2 mg) was added chlorobenzene (0.2 mL). Then solution A (20  $\mu\text{L}$ , 3.37 mCi) was added

and radioactivity of the mixture was measured. The reaction vessel was heated at 100 °C for 5 min. After that, aqueous KOH solution (45 w%, 40 µL) was added, and the mixture was heated at 100 °C for 15 min. The reaction vessel was cooled to room temperature. The reaction mixture was loaded on a light silica cartridge. Hexane (0.5 mL) was added into the reaction vessel, and the formed mixture was used to wash the silica cartridge. The silica cartridge was dried by nitrogen gas for 10 seconds, and then eluted with MeCN (2 x 1 mL). 0.1 M NH<sub>4</sub>·HCO<sub>2</sub> aqueous solution (1 mL) was added into the combined MeCN filtrate, and the formed solution was subjected to purification by semi-preparative HPLC. The fraction corresponding to radiolabeled product was collected and was measured to contain 1.32 mCi.

| Initial radio-activity | [ <sup>18</sup> F]Difluoromethyl-fenofibrate | RCY (HPLC) | Time in total | Decay-corrected RCY (HPLC) |
|------------------------|----------------------------------------------|------------|---------------|----------------------------|
| 3.37 mCi               | 1.32 mCi                                     | 39%        | 50 min        | 54%                        |

Radio HPLC chromatogram:

Column: XBridge Shield RP 18 3.5 µm 100 × 4.6 mm

Mobile phase: 45% CH<sub>3</sub>CN, 55% 0.1 M NH<sub>4</sub>·HCO<sub>2</sub> (aq)

Flow rate: 1 mL/min

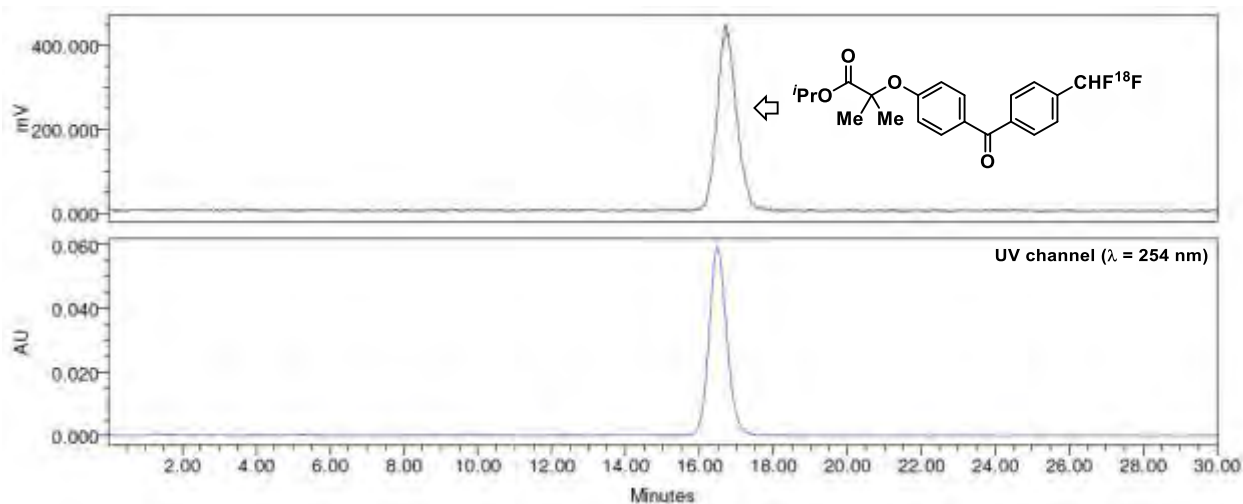

**Figure S30.** HPLC chromatogram (XBridge) of [<sup>18</sup>F]difluoromethyl-fenofibrate

Radio HPLC chromatogram:

Column: Synergi 4u Hydro-RP 80A 4 µm 150 × 4.6 mm

Mobile phase: 65% CH<sub>3</sub>CN, 35% 0.1 M NH<sub>4</sub>·HCO<sub>2</sub> (aq)

Flow rate: 1 mL/min



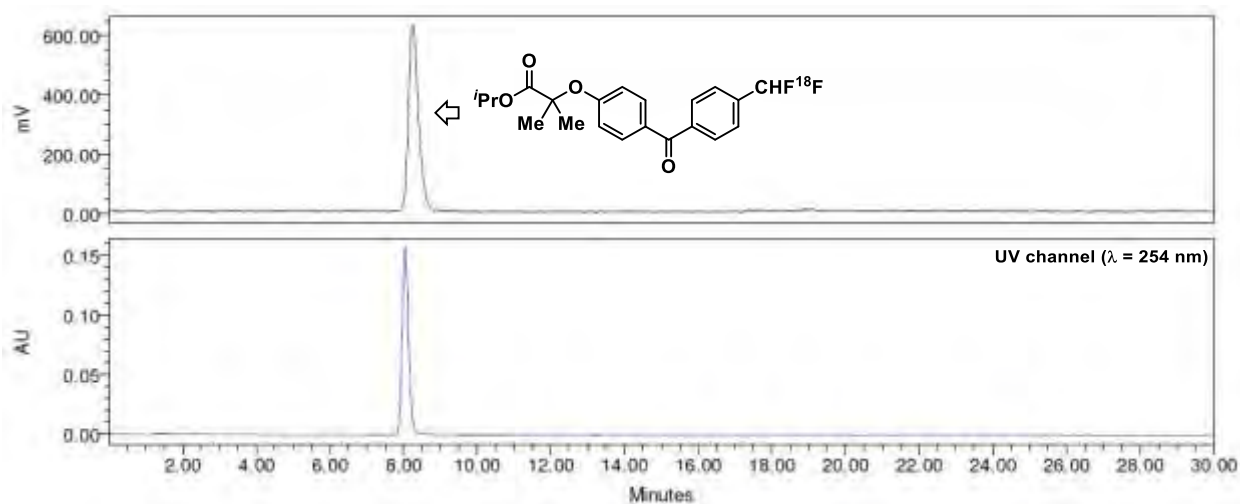

**Figure S31.** HPLC chromatogram (Synergi) of [ $^{18}\text{F}$ ]difluoromethyl-fenofibrate

Radio HPLC chromatogram:

Column: Luna 5u C18 100 Å 250 × 4.6 mm

Mobile phase: 70%  $\text{CH}_3\text{CN}$ , 30% 0.1 M  $\text{NH}_4\cdot\text{HCO}_2$  (aq)

Flow rate: 1 mL/min

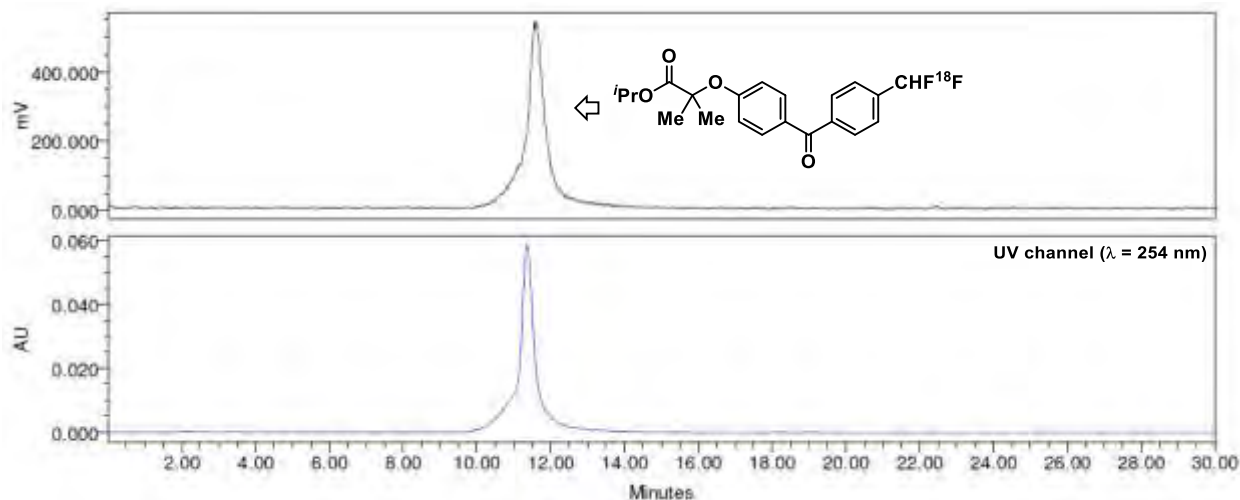

**Figure S32.** HPLC chromatogram (Luna) of [ $^{18}\text{F}$ ]difluoromethyl-fenofibrate

### [ $^{18}\text{F}$ ]Difluoromethyl-SC-58125

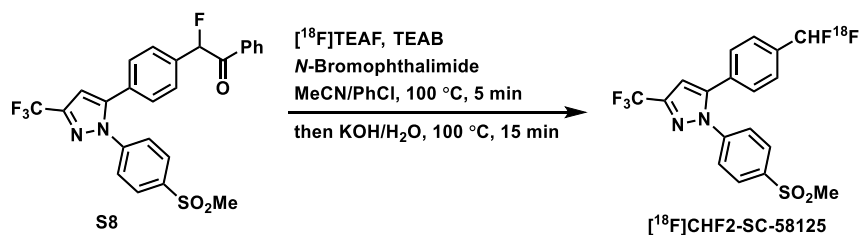

To a 1-dram (4 mL) glass vial containing TEAB (3.0 mg), precursor **S8** (10  $\mu\text{mol}$ , 5 mg) and *N*-

bromophthalimide (2 mg) was added chlorobenzene (0.2 mL). Then solution A (20  $\mu$ L, 3.77 mCi) was added and radioactivity of the mixture was measured. The reaction vessel was heated at 100  $^{\circ}$ C for 5 min. After that, aqueous KOH solution (45 w%, 40  $\mu$ L) was added, and the mixture was heated at 100  $^{\circ}$ C for 15 min. The reaction vessel was cooled to room temperature. The reaction mixture was loaded on a light silica cartridge. Hexane (0.5 mL) was added into the reaction vessel, and the formed mixture was used to wash the silica cartridge. The silica cartridge was dried by nitrogen gas for 10 seconds, and then eluted with MeCN (2 x 1 mL). 0.1 M  $\text{NH}_4\cdot\text{HCO}_2$  aqueous solution (1 mL) was added into the combined MeCN filtrate, and the formed solution was subjected to purification by semi-preparative HPLC. The fraction corresponding to radiolabeled product was collected and was measured to contain 1.39 mCi.

| Initial radio-activity | $^{18}\text{F}$ Difluoromethyl-SC-58125 | RCY (HPLC) | Time in total | Decay-corrected RCY (HPLC) |
|------------------------|-----------------------------------------|------------|---------------|----------------------------|
| 3.77 mCi               | 1.39 mCi                                | 37%        | 50 min        | 51%                        |

Radio HPLC chromatogram:

Column: XBridge Shield RP 18 3.5  $\mu$ m 100 x 4.6 mm

Mobile phase: 50%  $\text{CH}_3\text{CN}$ , 50% 0.1 M  $\text{NH}_4\cdot\text{HCO}_2$  (aq)

Flow rate: 1 mL/min

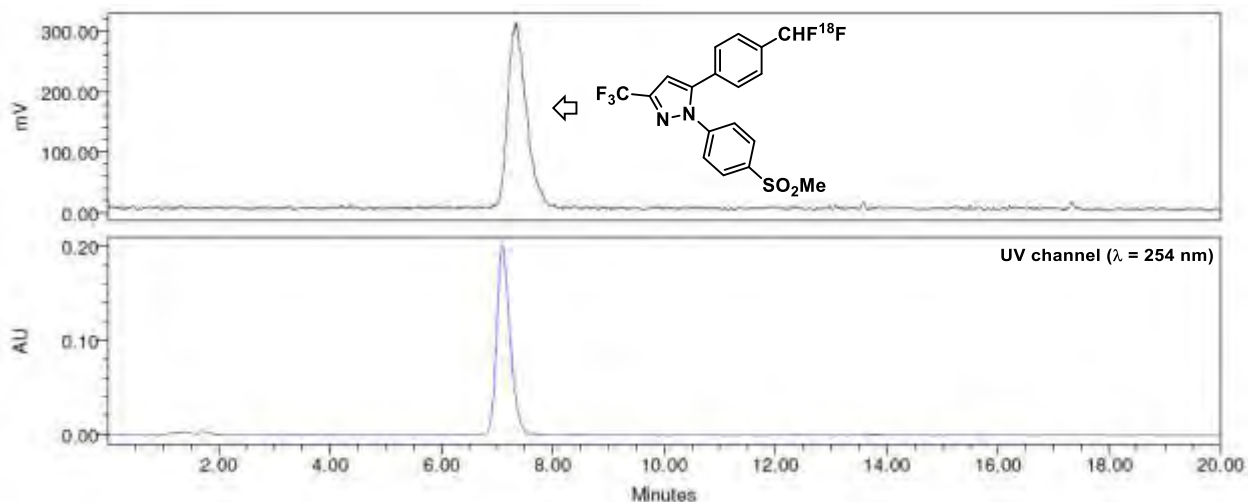

**Figure S33.** HPLC chromatogram (XBridge) of  $^{18}\text{F}$ difluoromethyl-SC-58125

Radio HPLC chromatogram:

Column: Synergi 4u Hydro-RP 80A 4  $\mu$ m 150 x 4.6 mm

Mobile phase: 50%  $\text{CH}_3\text{CN}$ , 50% 0.1 M  $\text{NH}_4\cdot\text{HCO}_2$  (aq)

Flow rate: 1 mL/min

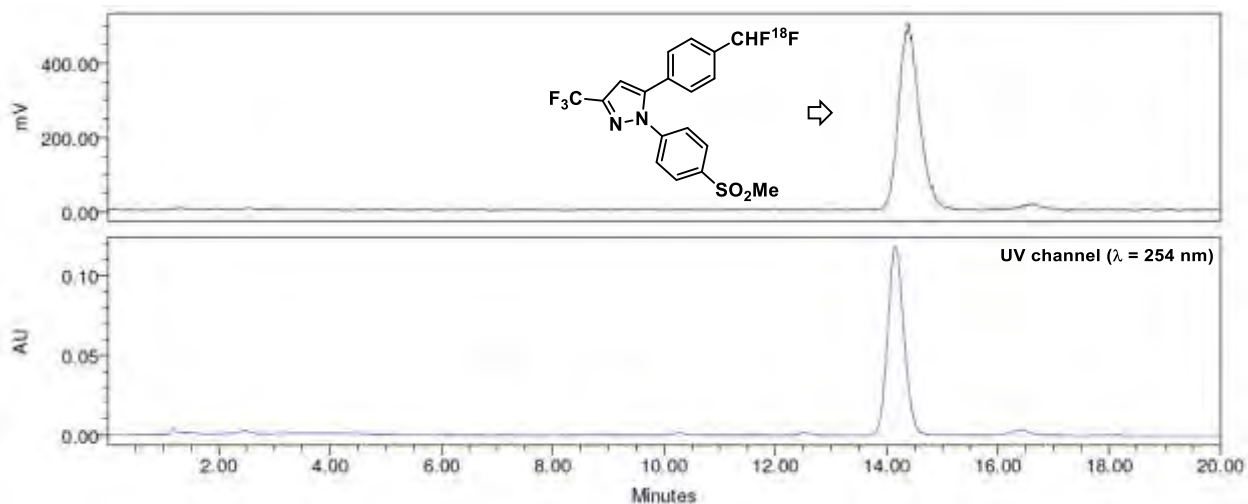

Figure S34. HPLC chromatogram (Synergi) of [<sup>18</sup>F]difluoromethyl-SC-58125

Radio HPLC chromatogram:

Column: Luna 5u C18 100 Å 250 × 4.6 mm

Mobile phase: 60% CH<sub>3</sub>CN, 40% 0.1 M NH<sub>4</sub>·HCO<sub>2</sub> (aq)

Flow rate: 1 mL/min

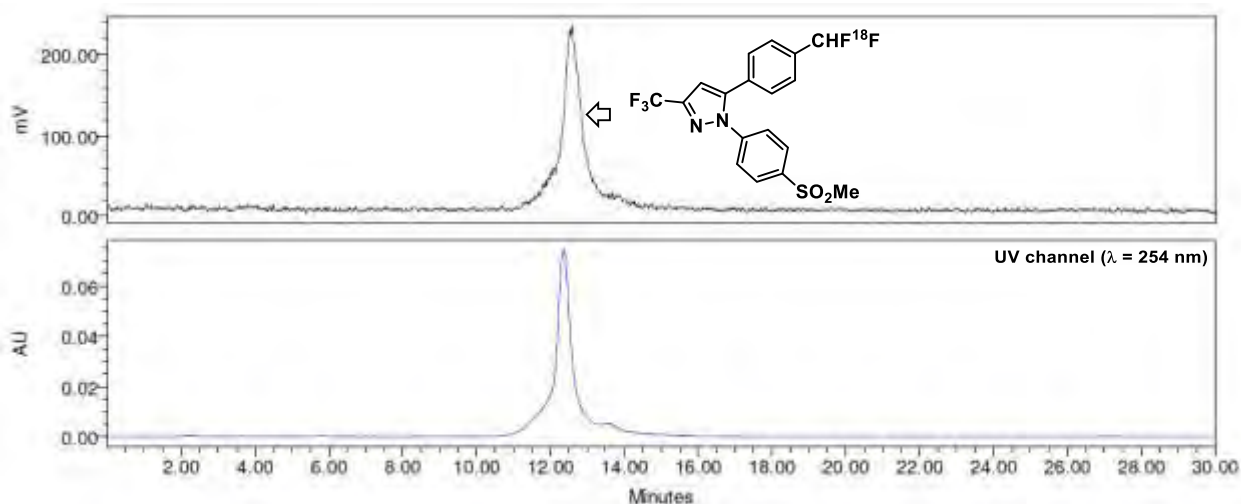

Figure S35. Luna HPLC chromatogram of [<sup>18</sup>F]difluoromethyl-SC-58125

### Specific Activity of [<sup>18</sup>F]3m (General Method)

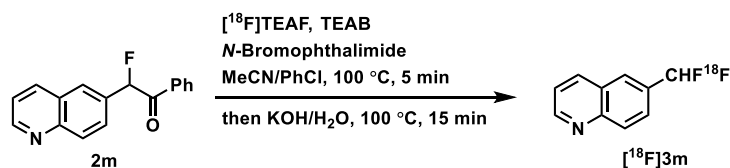

To a 1-dram (4 mL) glass vial containing TEAB (1.5 mg), precursor **2m** (10 μmol, 2.7 mg) and *N*-bromophthalimide (2 mg) was added chlorobenzene (0.2 mL). Then solution B (20 μL, 2.08 mCi) was added and radioactivity of the mixture was measured. The reaction vessel was heated at 100 °C for 5 min. After

that, aqueous KOH solution (45 w%, 40  $\mu\text{L}$ ) was added, and the mixture was heated at 100  $^{\circ}\text{C}$  for 15 min. The reaction vessel was cooled to room temperature. The reaction mixture was loaded on a light silica cartridge. Hexane (0.5 mL) was added into the reaction vessel, and the formed mixture was used to wash the silica cartridge. The silica cartridge was dried by nitrogen gas for 10 seconds, and then eluted with MeCN (2 x 1 mL). 0.1 M  $\text{NH}_4\cdot\text{HCO}_2$  aqueous solution (1 mL) was added into the combined MeCN filtrate, and the formed solution was subjected to purification by semi-preparative HPLC. The fraction corresponding to radiolabeled product was collected and was measured to contain 0.892 mCi. An aliquot (20  $\mu\text{L}$ ) was injected to analytical radio-HPLC and specific activity (0.49 mCi/ $\mu\text{mol}$ ) was calculated based on mass calibration curve.

Analytical HPLC conditions:

Column: Luna 5u C18 100  $\text{\AA}$  250  $\times$  4.6 mm

Mobile phase: 50%  $\text{CH}_3\text{CN}$ , 50% 0.1 M  $\text{NH}_4\cdot\text{HCO}_2$  (aq)

Flow rate: 1 mL/min

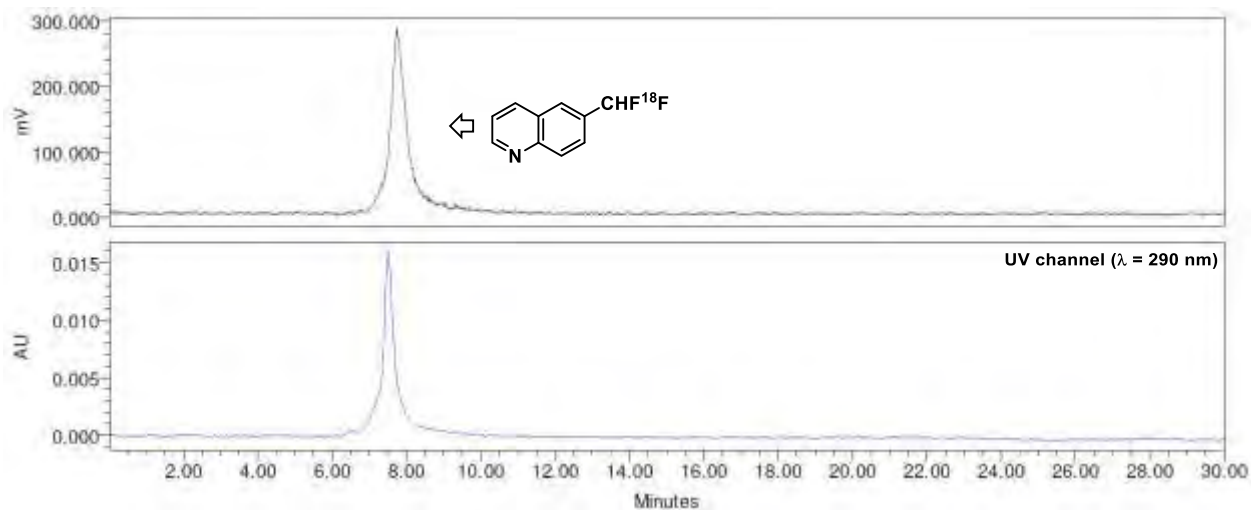

**Figure S36.** HPLC chromatogram of [<sup>18</sup>F]6-difluoromethylquinoline

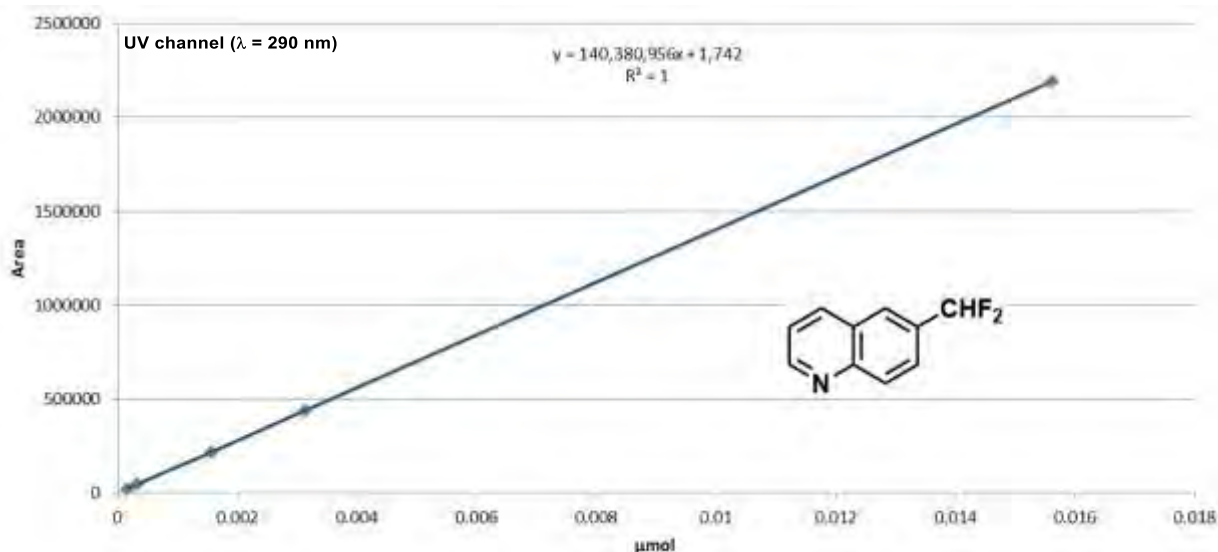

Figure S37. Calibration curve of 6-difluoromethylquinoline (3m)

### Improvement of Specific Activity

$^{18}\text{F}$ Fluoride was prepared for radiofluorination by the following method: Sep-Pak<sup>®</sup> QMA cartridge was washed with an aqueous KOMs solution (0.2 M, 1 mL) and water (10 mL).  $^{18}\text{F}$ -fluoride aqueous solution was loaded onto the cartridge. The cartridge was washed with dry MeOH (1 mL), and then eluted with a solution of tetrabutylammonium methanesulfonate (TBAOMs, 10 mg) in methanol (0.6 mL). The  $^{18}\text{F}$ TBAF/TBAOMs methanol solution was collected in a V-shaped vial and sealed with a teflon-lined septum. The vial was heated to 100 °C while nitrogen gas was passed through a P<sub>2</sub>O<sub>5</sub>-Drierite<sup>™</sup> column followed by a vented needle. When no liquid was visible in the vial, it was removed from heat. The vial was then cooled down to room temperature under nitrogen flow (10 mL/min). The contents were dissolved in the anhydrous chlorobenzene (0.2 mL, solution c).

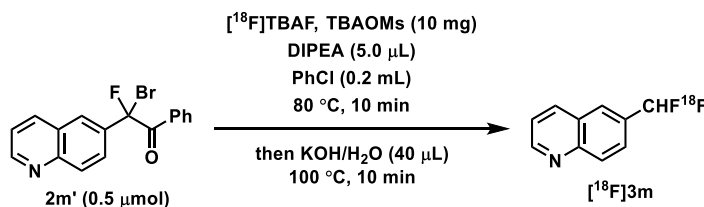

To a 1-dram (4 mL) glass vial containing precursor  $2\text{m}'$  (0.17 mg, 0.5  $\mu\text{mol}$ ) was added the solution c (0.2 mL) and DIPEA (5.0  $\mu\text{L}$ ). The radioactivity of the mixture was measured. The reaction vessel was heated at 80 °C for 10 min. After that, aqueous KOH solution (45 w%, 40  $\mu\text{L}$ ) was added, and the mixture was heated at 100 °C for 10 min. The reaction vessel was cooled to room temperature. The reaction mixture was loaded on a light silica cartridge. Hexane (0.5 mL) was added into the reaction vessel, and the formed mixture was used to wash the silica cartridge. The silica cartridge was dried by nitrogen gas for 10 seconds, and then eluted with MeCN (2 x 1 mL). 0.1 M NH<sub>4</sub>·HCO<sub>2</sub> aqueous solution (1 mL) was added into the combined MeCN filtrate, and the formed solution was subjected to purification by semi-preparative HPLC. An aliquot (20  $\mu\text{L}$  or

40  $\mu\text{L}$ ) was injected to analytical radio-HPLC and specific activity was calculated based on mass calibration curve.

| entry | Initial radio-activity | $[^{18}\text{F}]\mathbf{3m}$ | RCY (HPLC) | SA                      |
|-------|------------------------|------------------------------|------------|-------------------------|
| 1     | 12 mCi                 | 1.9 mCi                      | 16%        | 38 mCi/ $\mu\text{mol}$ |
| 2     | 18 mCi                 | 1.3 mCi                      | 7%         | 64 mCi/ $\mu\text{mol}$ |
| 3     | 39 mCi                 | 3.1 mCi                      | 8%         | 81 mCi/ $\mu\text{mol}$ |

Analytical HPLC conditions:

Column: Luna 5u C18 100  $\text{\AA}$  250  $\times$  4.6 mm

Mobile phase: 45%  $\text{CH}_3\text{CN}$ , 55% 0.1 M  $\text{NH}_4\cdot\text{HCO}_2(\text{aq})$

Flow rate: 1.0 mL/min

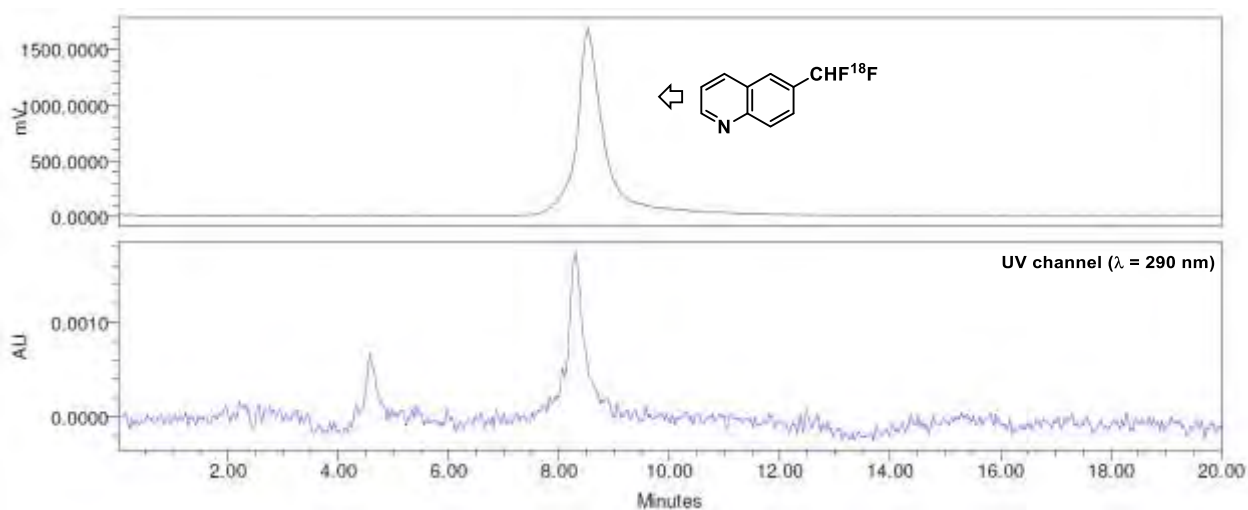

**Figure S38.** HPLC chromatogram of  $[^{18}\text{F}]\mathbf{6}$ -difluoromethylquinoline (entry 3)

## References

1. Yin, J.; Zarkowsky, D. S.; Thomas, D. W.; Zhao, M. M.; Huffman, M. A. *Org. Lett.* **2014**, *6*, 1465.
2. Ge, S.; Chaładaj, W.; Hartwig, J. *J. Am. Chem. Soc.* **2014**, *136*, 4149.
3. Gu, Y.; Leng, X.; Shen, Q. *Nat. Commun.* **2014**, *5*, 5405.
4. Rahman, O.; Långström, B. *J. Labelled Comp. Radiopharm.* **2007**, *50*, 1192.
5. Zhao, Y.; Hu, J. *Angew. Chem. Int. Ed.* **2012**, *51*, 1033.
6. Ivashkin, P.; Lemonnier, G.; Cousin, J.; Grégoire, V.; Labar, D.; Jubault, P.; Pannecoucke, X. *Chem.–Eur. J.* **2014**, *20*, 9514.
7. Uddin, Md. J.; Crewst, B. C.; Ghebreselasiet, K.; Tantawy, M. N.; Marnett, L. J. *ACS Med. Chem. Lett.* **2011**, *2*, 160.

**$^1\text{H}$  NMR of (Methylenedioxy)phenyl-fluoroacetophenone (2a)**CDCl<sub>3</sub>, 24 °C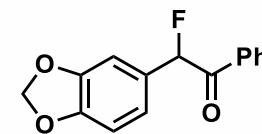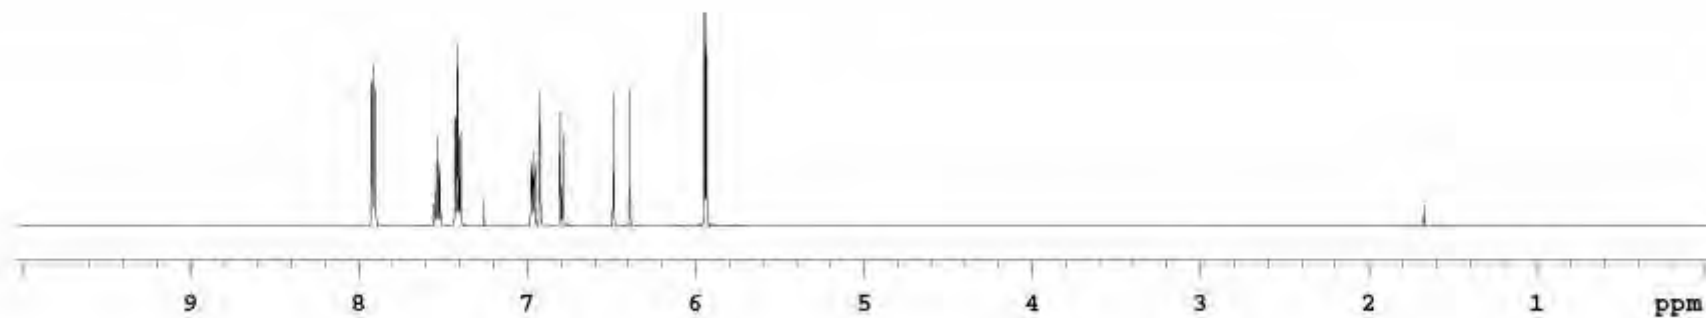



**$^{19}\text{F}$  NMR of (Methylenedioxy)phenyl-fluoroacetophenone (2a)**CDCl<sub>3</sub>, 24 °C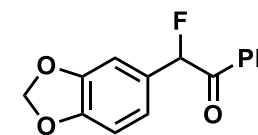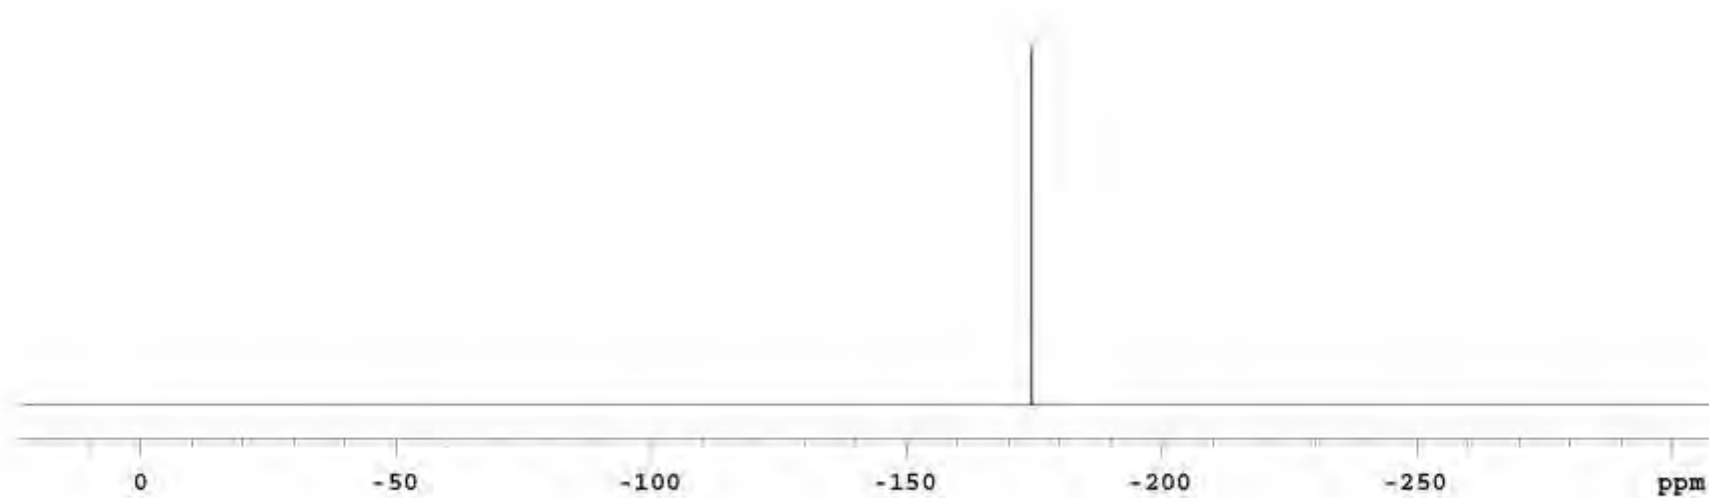

**$^{13}\text{C}$  NMR of (Methylenedioxy)phenyl-fluoroacetophenone (2a)**CDCl<sub>3</sub>, 25 °C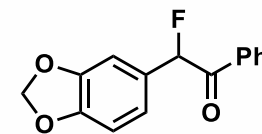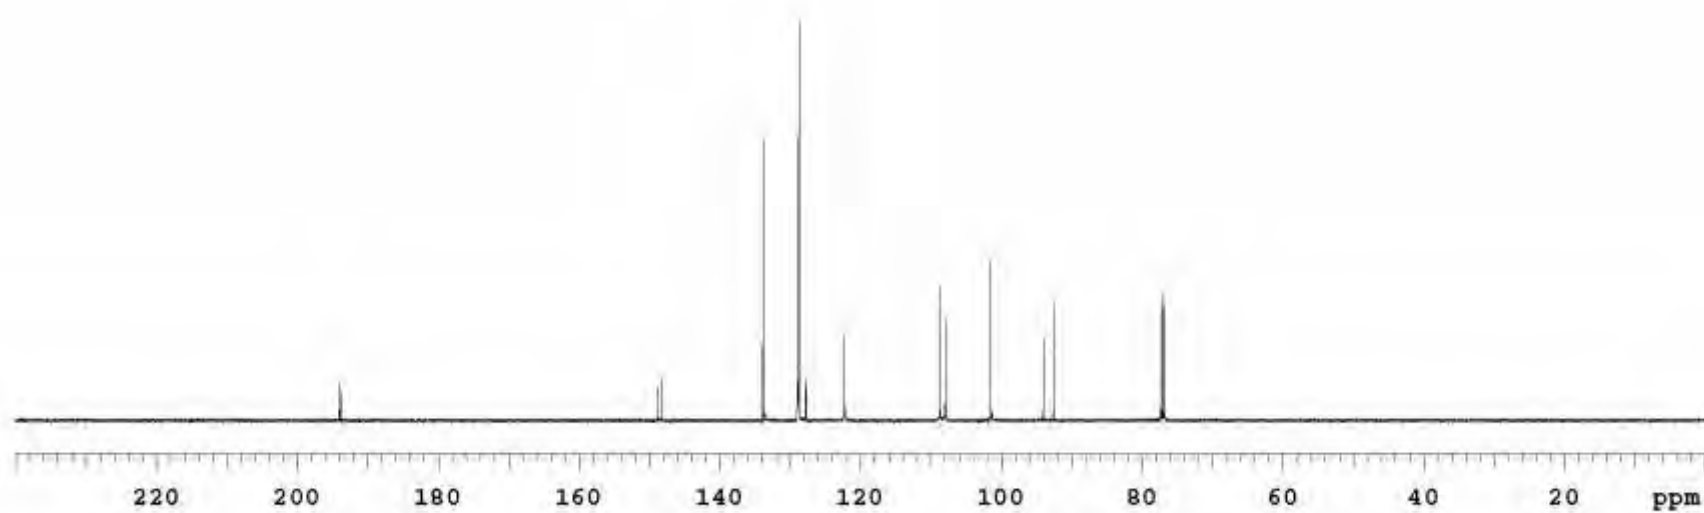

**$^1\text{H}$  NMR of (4-*N*-Boc-methylamino)phenyl-fluoroacetophenone (2b)**CDCl<sub>3</sub>, 25 °C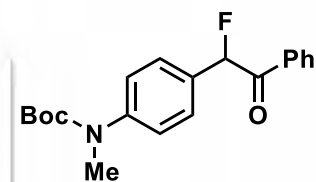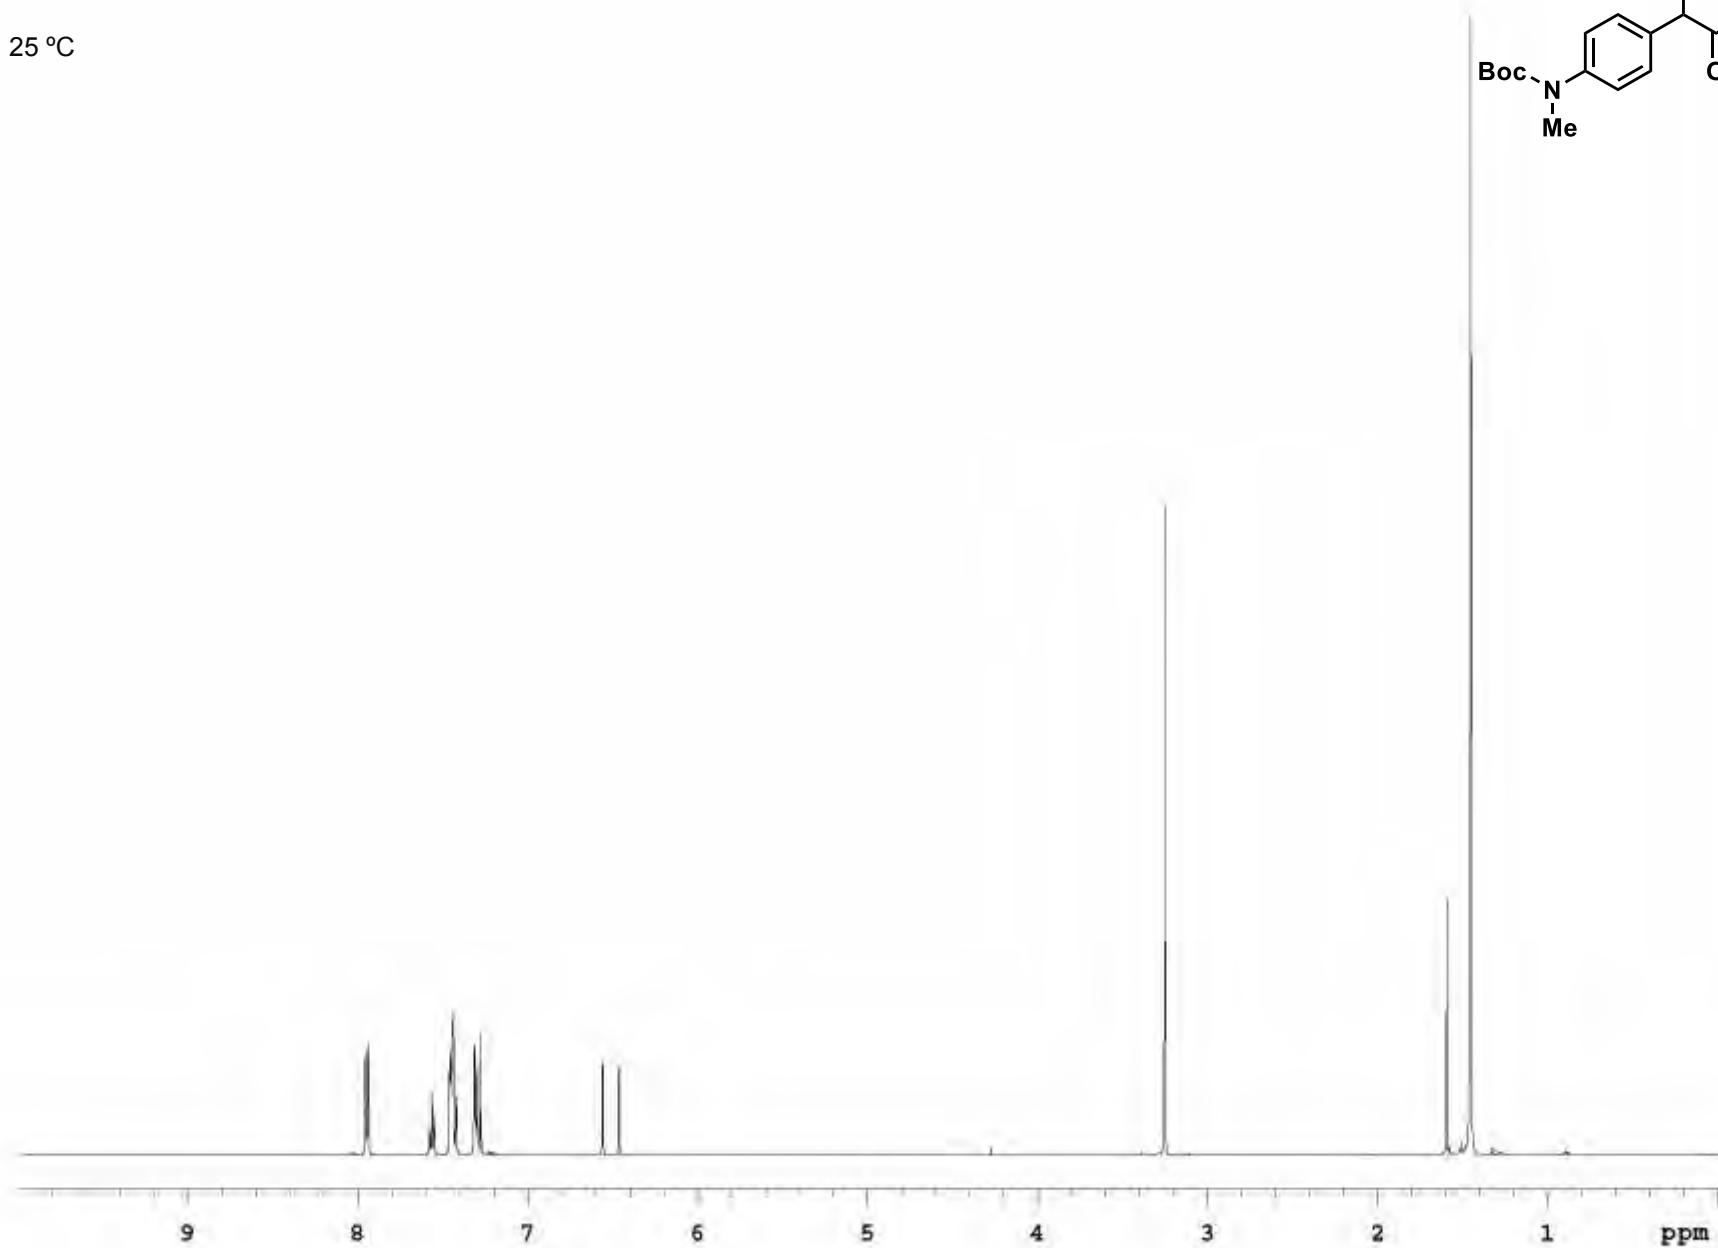

**$^{19}\text{F}$  NMR of (4-*N*-Boc-methylamino)phenyl-fluoroacetophenone (2b)**CDCl<sub>3</sub>, 25 °C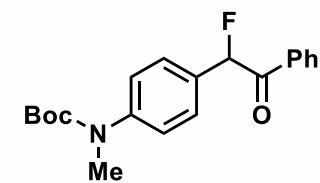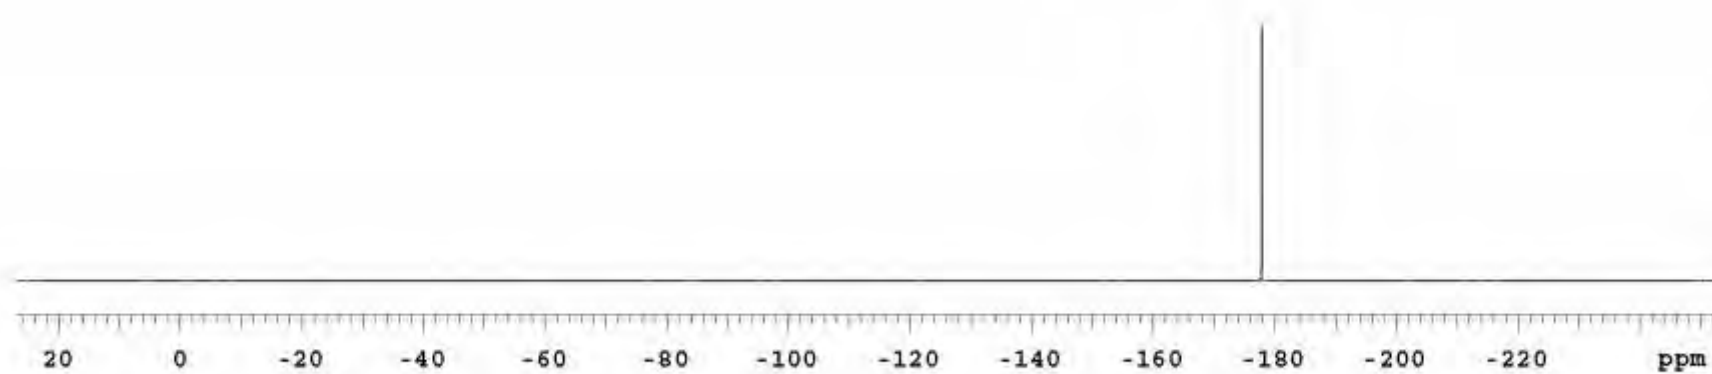

**$^{13}\text{C}$  NMR of (4-*N*-Boc-methylamino)phenyl-fluoroacetophenone (2b)**CDCl<sub>3</sub>, 25 °C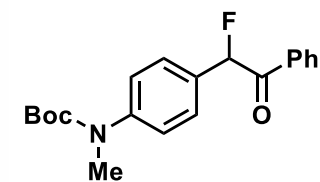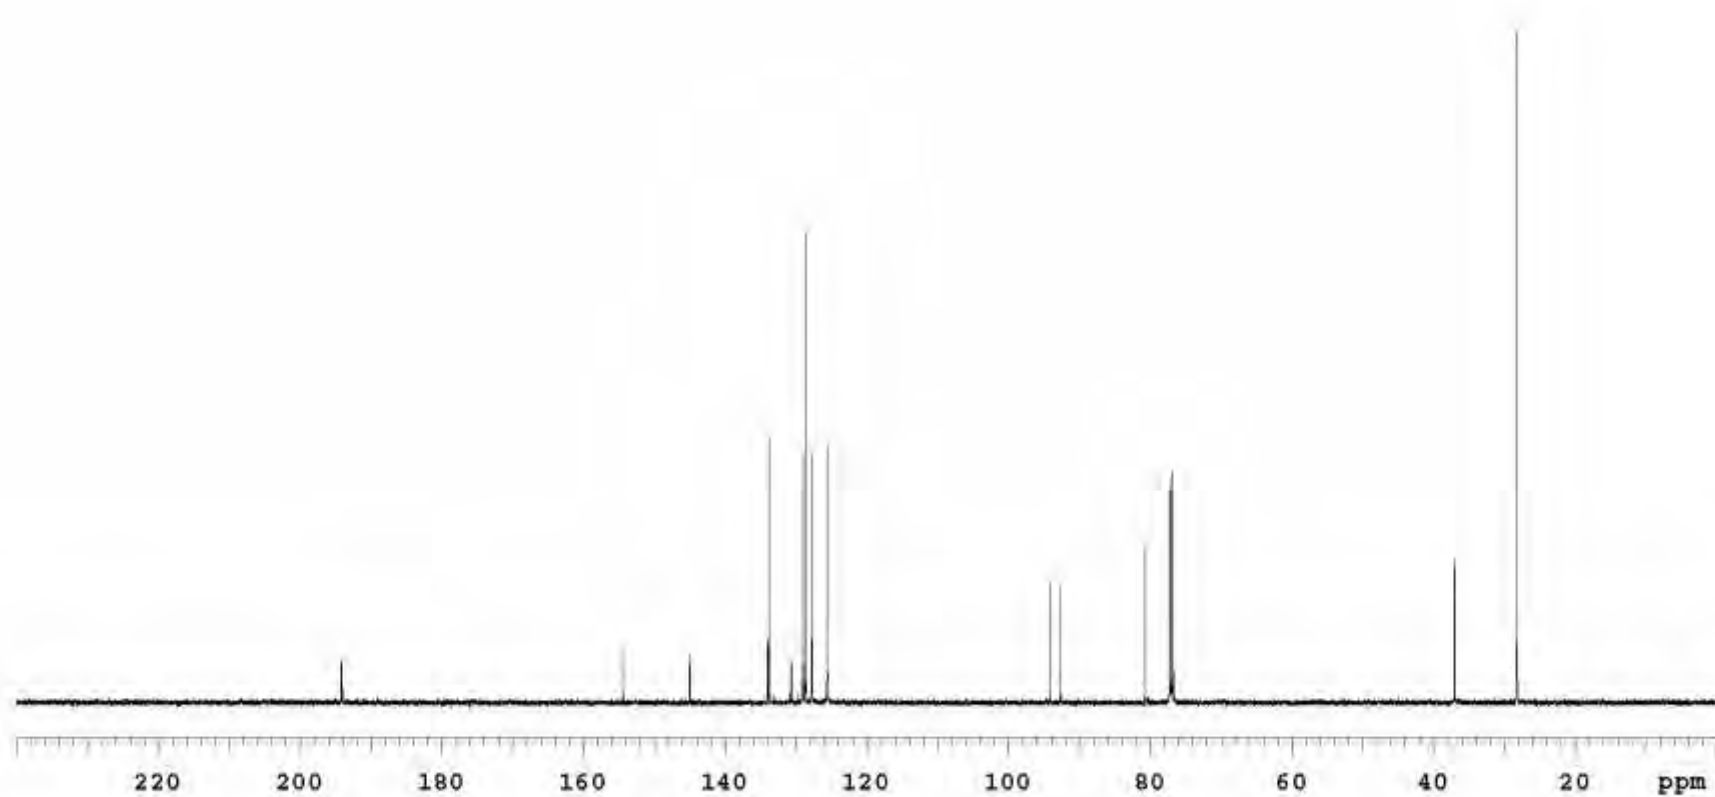

**$^1\text{H}$  NMR of (3-Hydroxypropyl)phenyl-fluoroacetophenone (2c)**CDCl<sub>3</sub>, 22 °C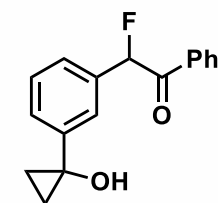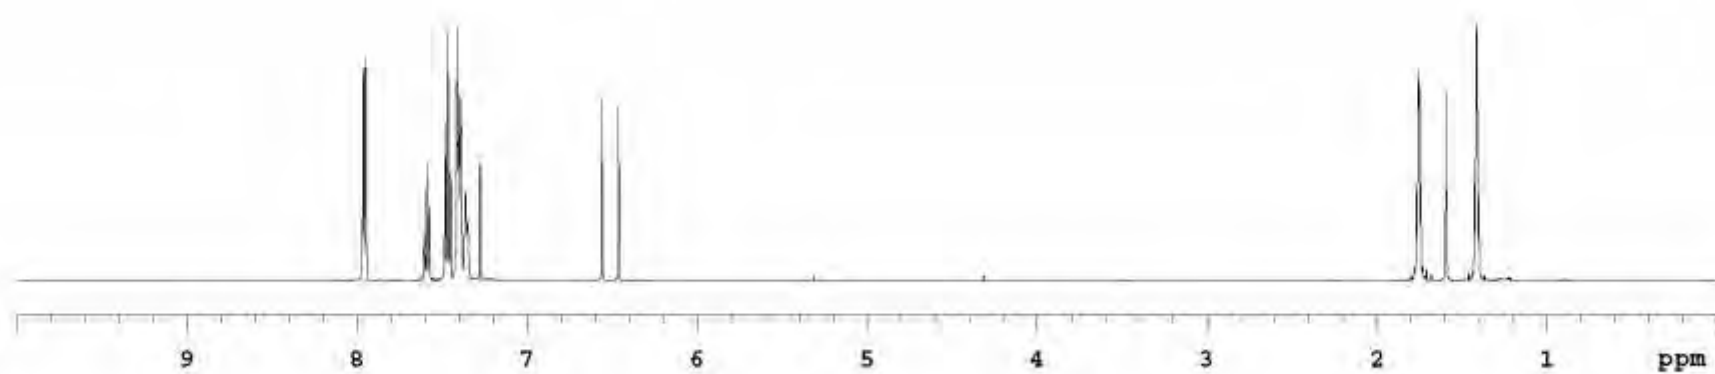

**$^{19}\text{F}$  NMR of (3-Hydroxypropanyl)phenyl-fluoroacetophenone (2c)**CDCl<sub>3</sub>, 23 °C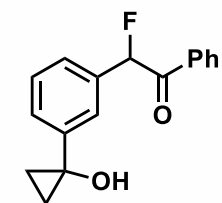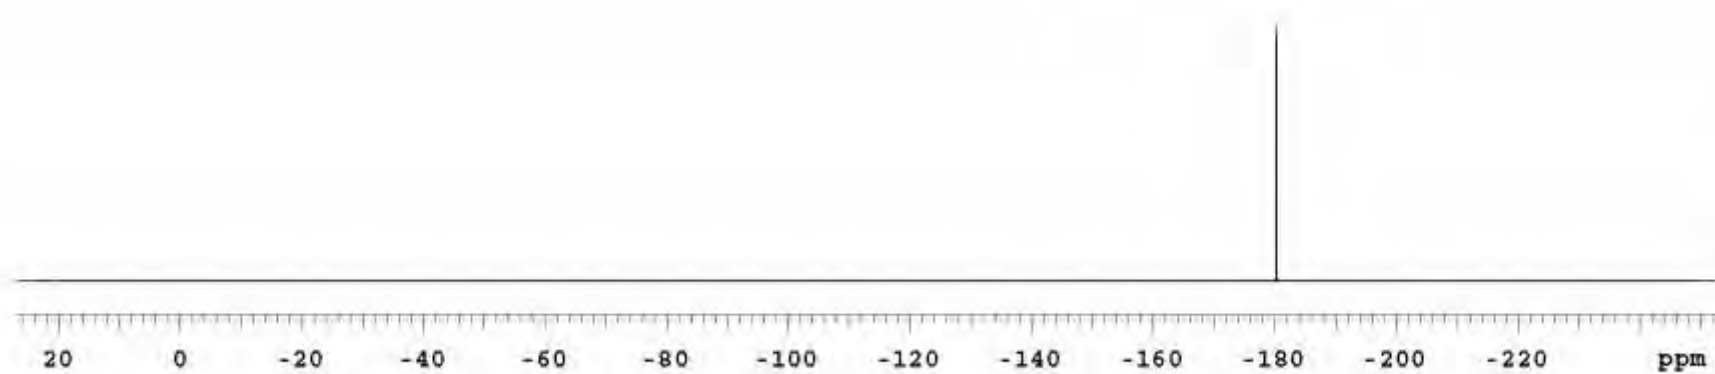

**$^{13}\text{C}$  NMR of (3-Hydroxypropyl)phenyl-fluoroacetophenone (2c)**CDCl<sub>3</sub>, 25 °C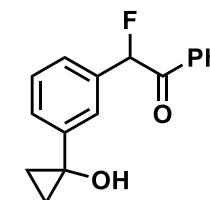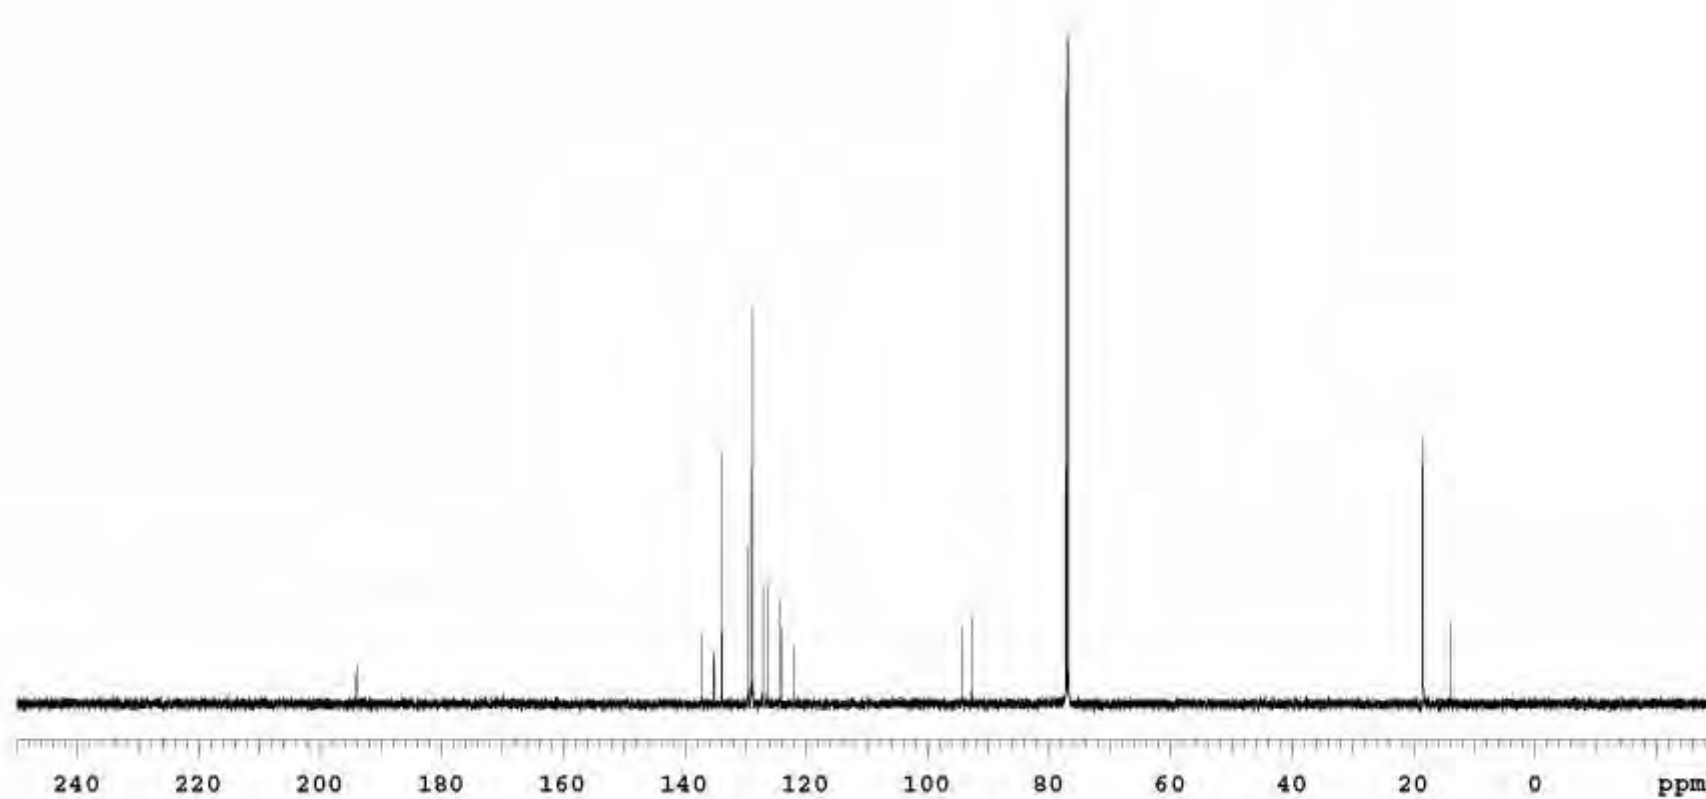



**$^1\text{H}$  NMR of (3-Hydroxypropyl)phenyl-fluoroacetophenone (2d)**CDCl<sub>3</sub>, 25 °C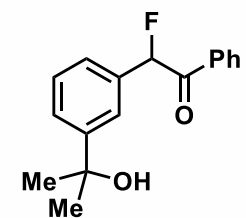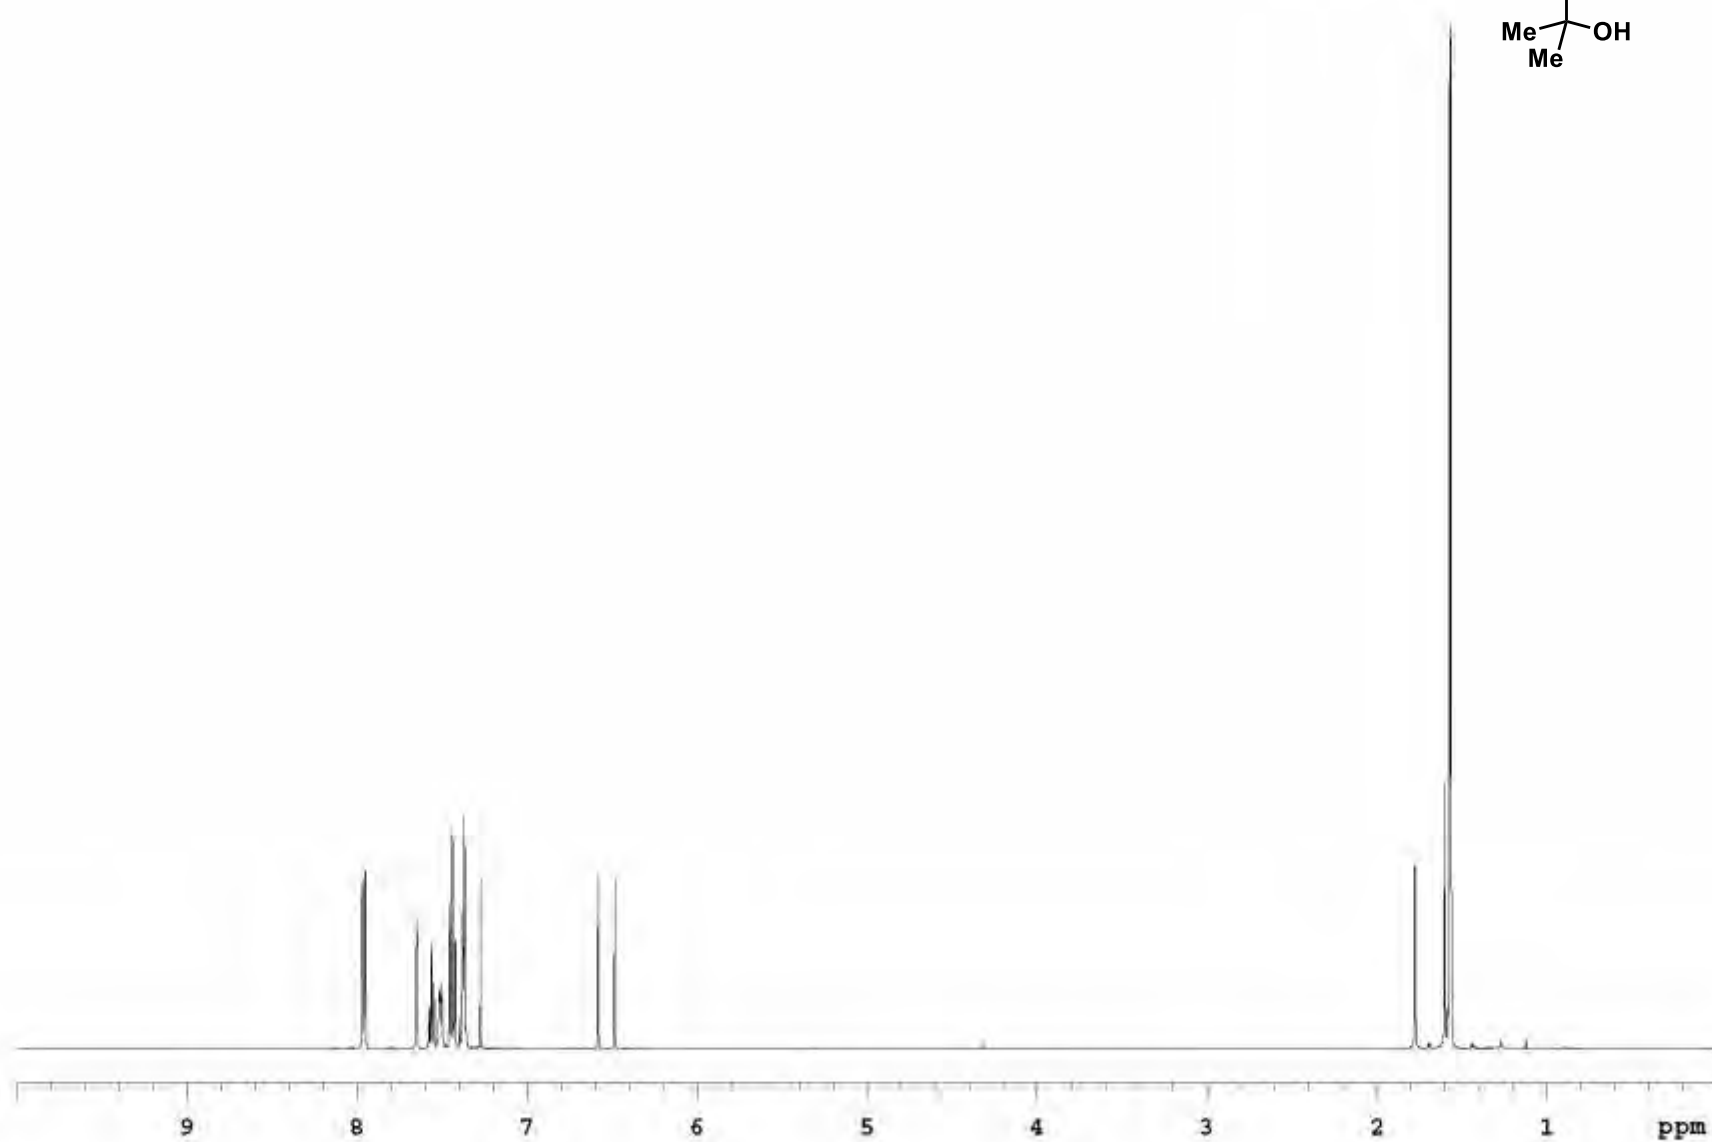

**$^{19}\text{F}$  NMR of (3-Hydroxypropanyl)phenyl-fluoroacetophenone (2d)**CDCl<sub>3</sub>, 25 °C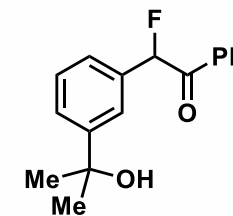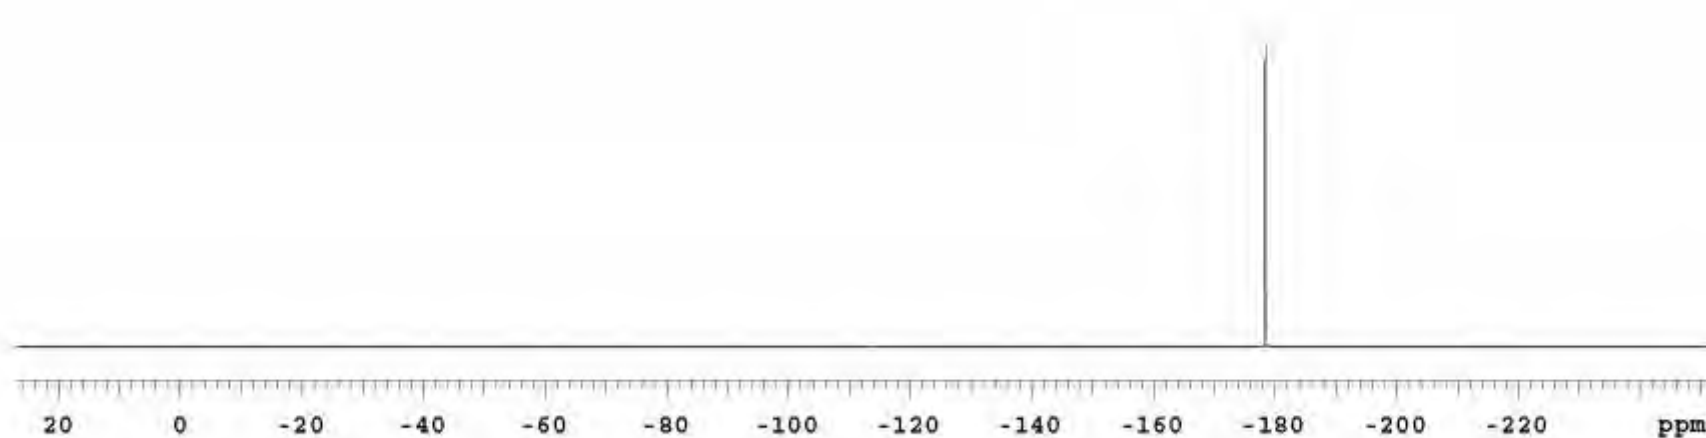

**$^{13}\text{C}$  NMR of (3-Hydroxypropanyl)phenyl-fluoroacetophenone (2d)**CDCl<sub>3</sub>, 25 °C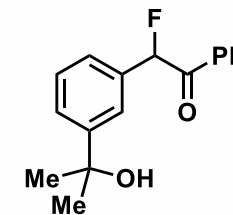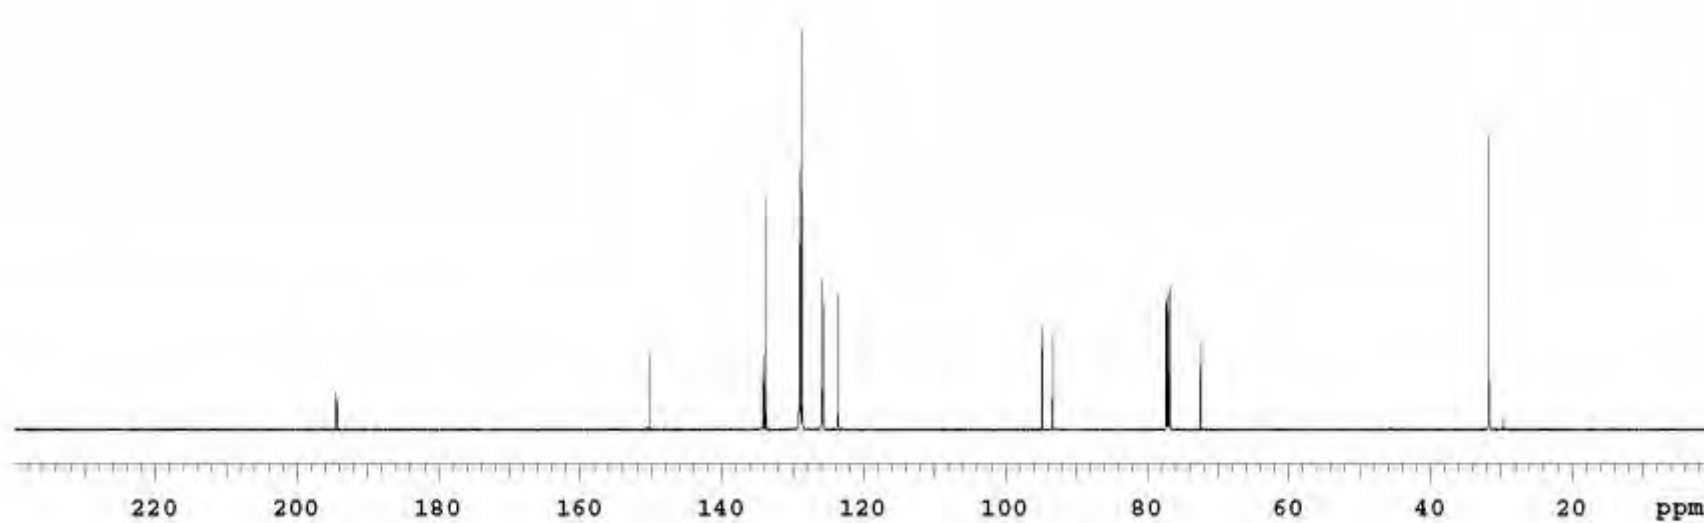

**$^1\text{H}$  NMR of 1-Bromo-3-chloro-5-(phenylethynyl)benzene (S11)**CDCl<sub>3</sub>, 25°C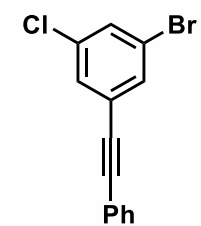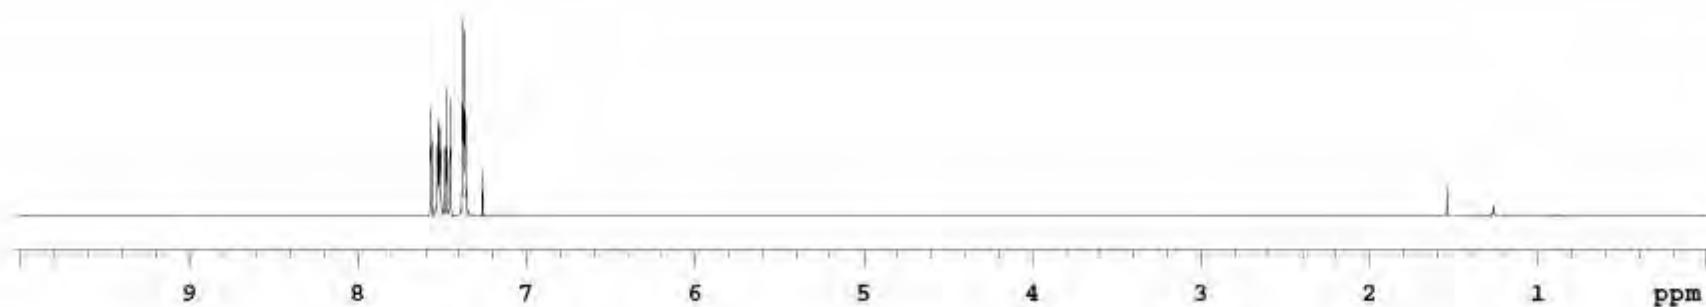

**$^{13}\text{C}$  NMR of 1-Bromo-3-chloro-5-(phenylethynyl)benzene (S11)**CDCl<sub>3</sub>, 25 °C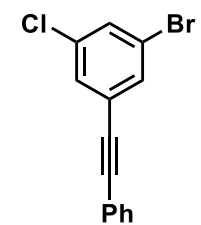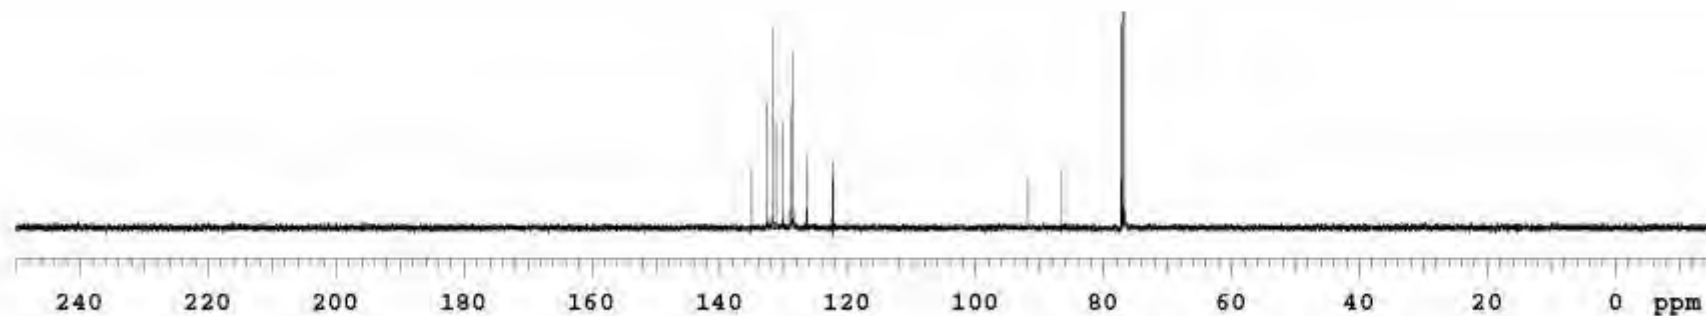

**$^1\text{H}$  NMR of (3-Phenylacetylenyl-5-chlorophenyl)-fluoroacetophenone (2e)**CDCl<sub>3</sub>, 25°C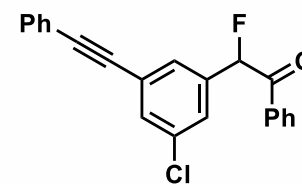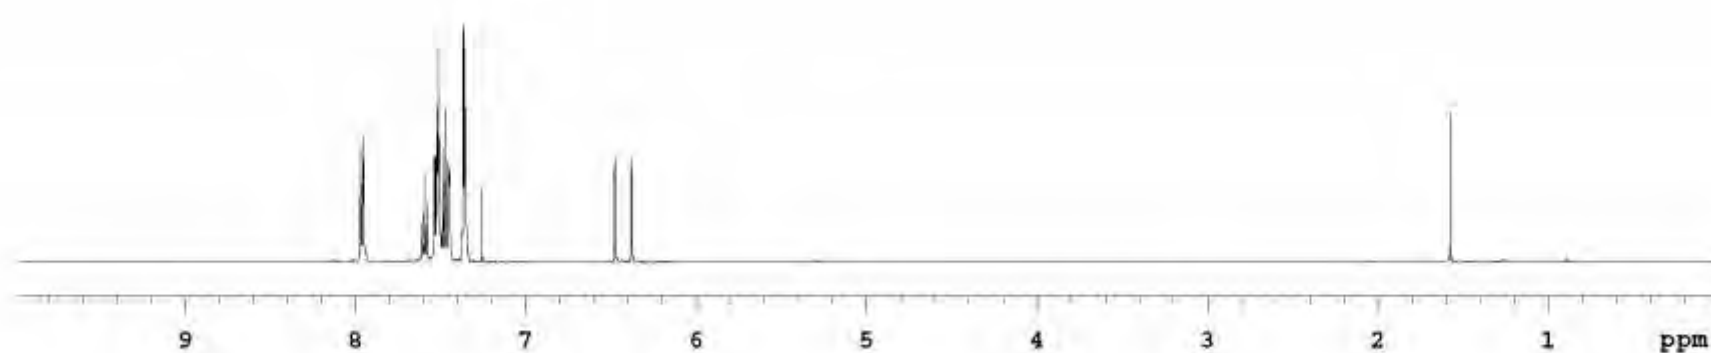

**$^{19}\text{F}$  NMR of (3-Phenylethylenyl-5-chlorophenyl)-fluoroacetophenone (2e)**CDCl<sub>3</sub>, 25 °C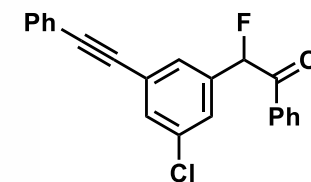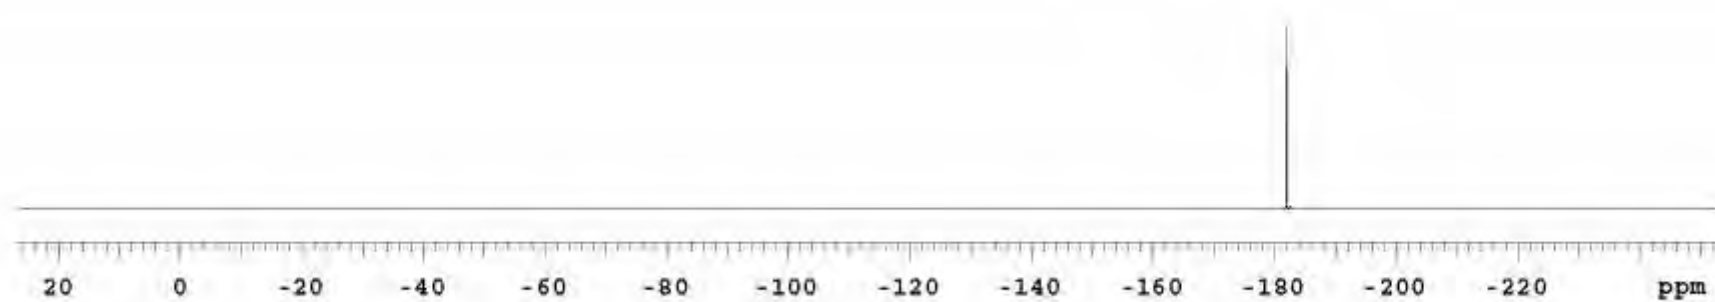

**$^{13}\text{C}$  NMR of (3-Phenylacetylenyl-5-chlorophenyl)-fluoroacetophenone (2e)**CDCl<sub>3</sub>, 25 °C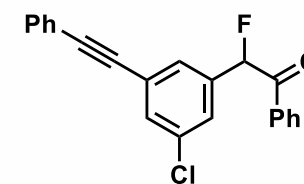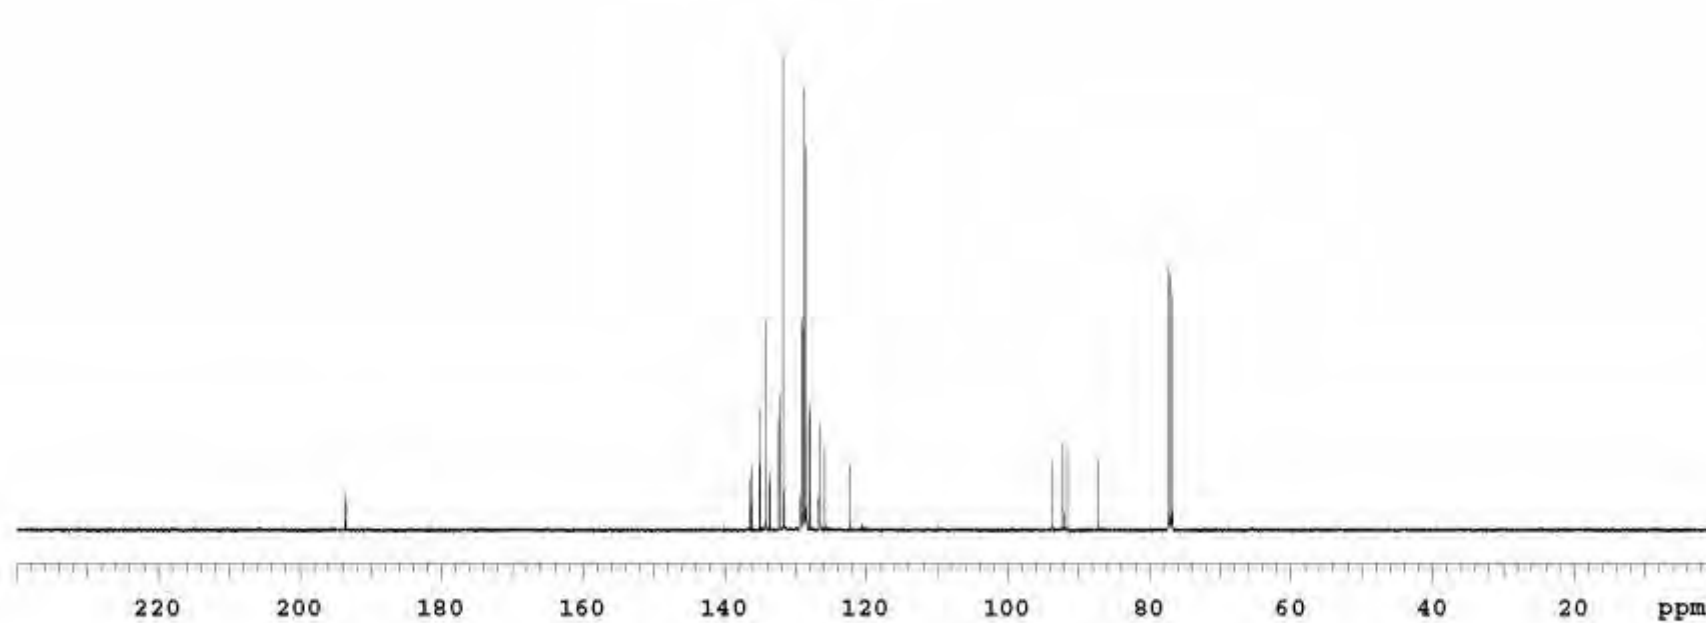



**$^1\text{H}$  NMR of (4-Pyrazolyl)phenyl-fluoroacetophenone (2f)**CDCl<sub>3</sub>, 25 °C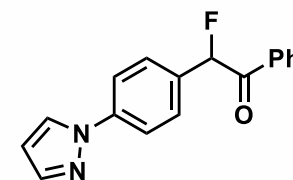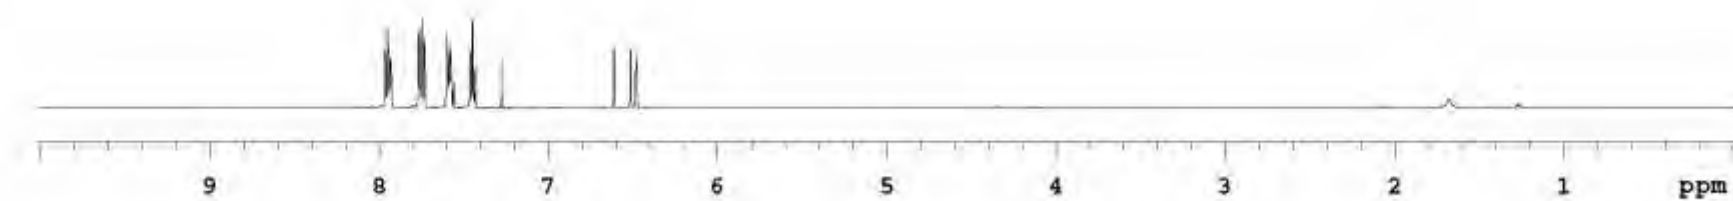

**$^{19}\text{F}$  NMR of (4-Pyrazolyl)phenyl-fluoroacetophenone (2f)**CDCl<sub>3</sub>, 24 °C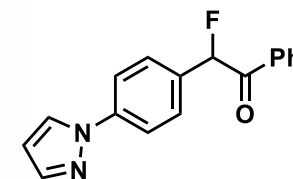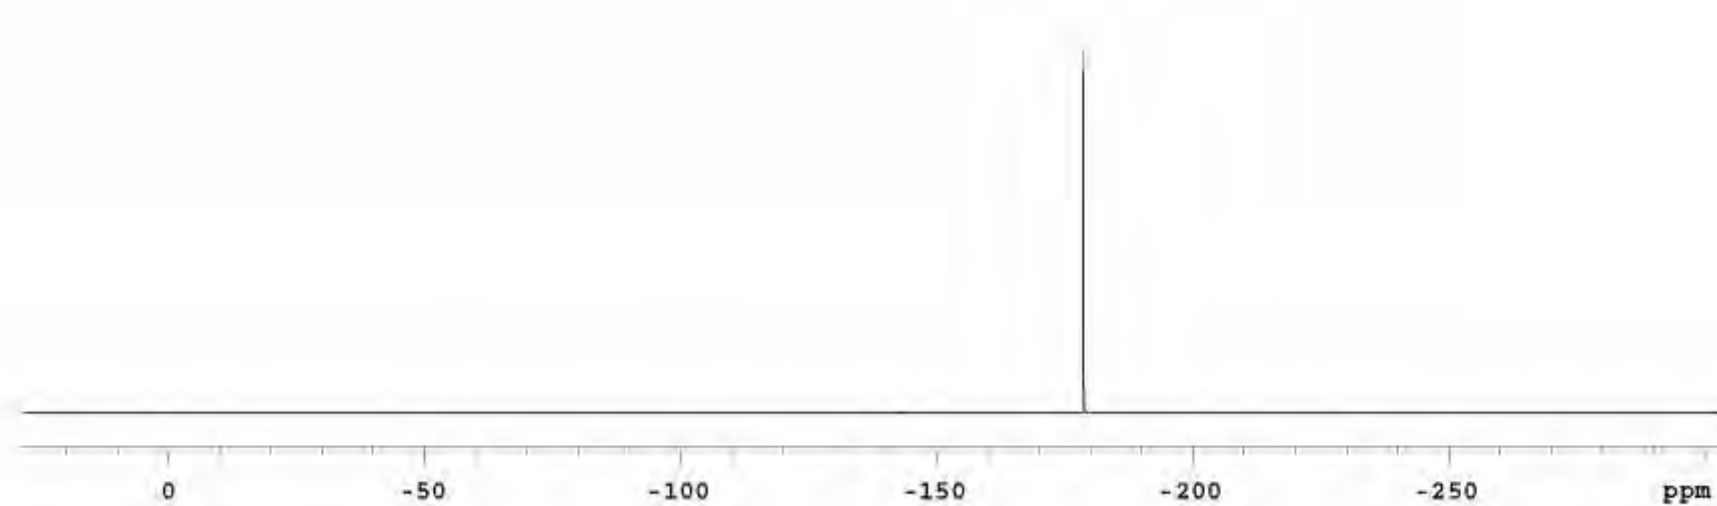

**$^{13}\text{C}$  NMR of (4-Pyrazolyl)phenyl-fluoroacetophenone (2f)**CDCl<sub>3</sub>, 25 °C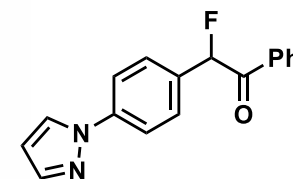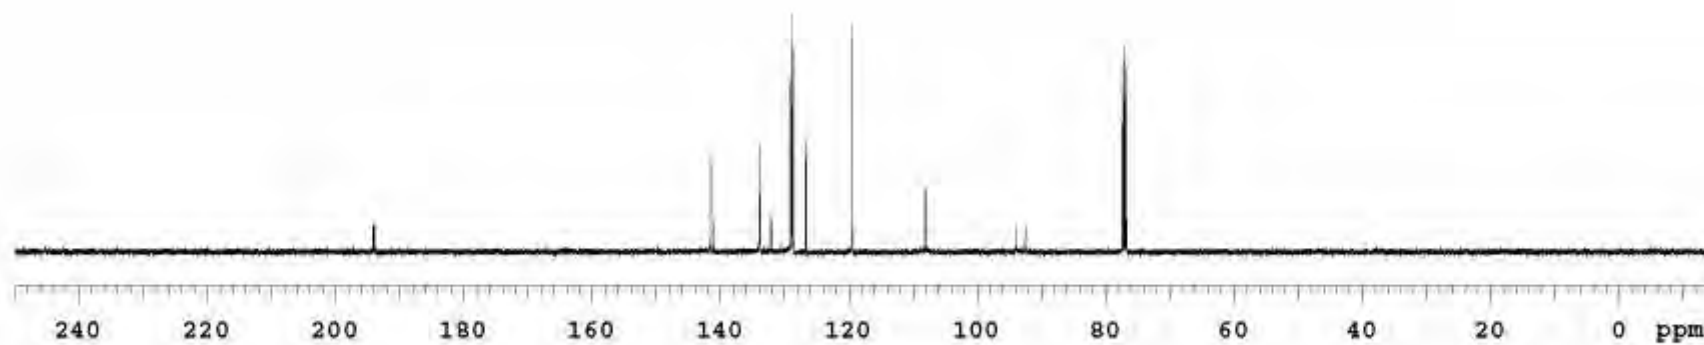

**$^1\text{H}$  NMR of (3-Morpholino)phenyl-fluoroacetophenone (2g)**CDCl<sub>3</sub>, 25 °C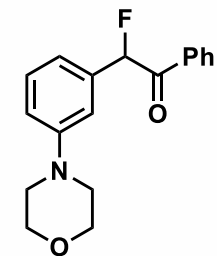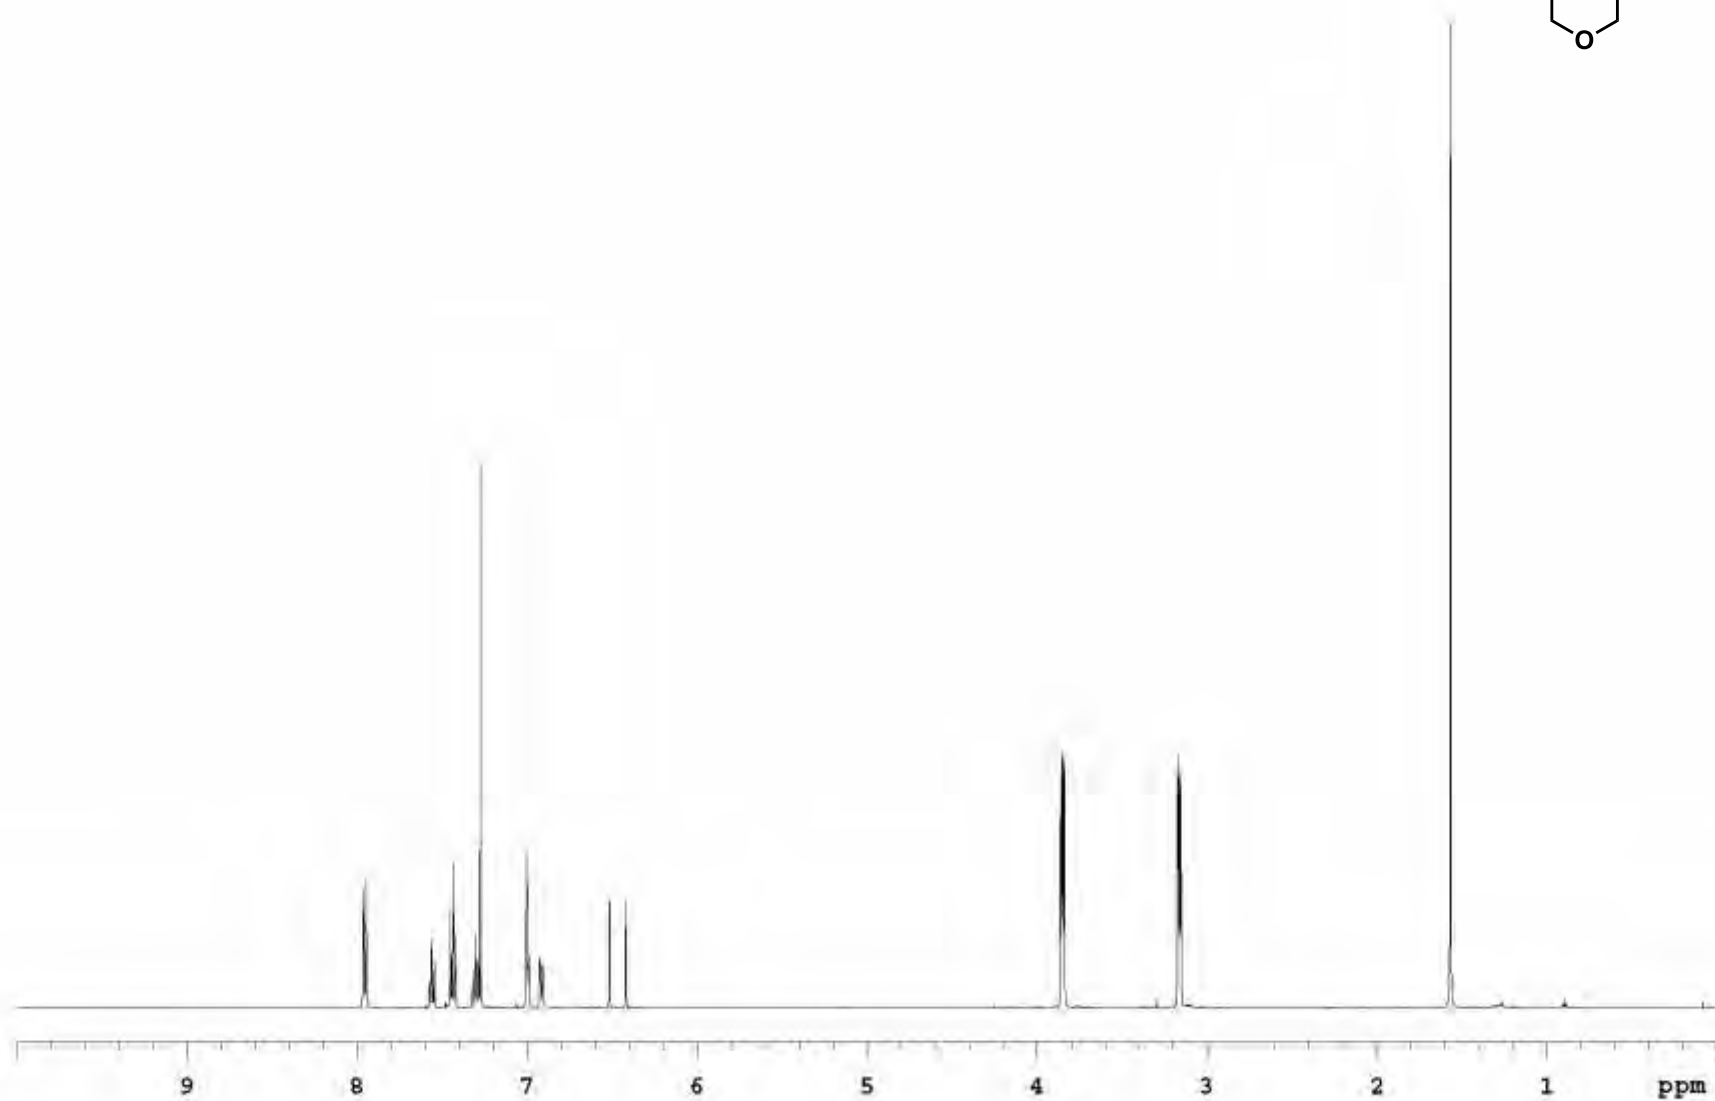

**$^{19}\text{F}$  NMR of (3-Morpholino)phenyl-fluoroacetophenone (2g)**CDCl<sub>3</sub>, 23 °C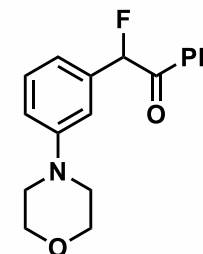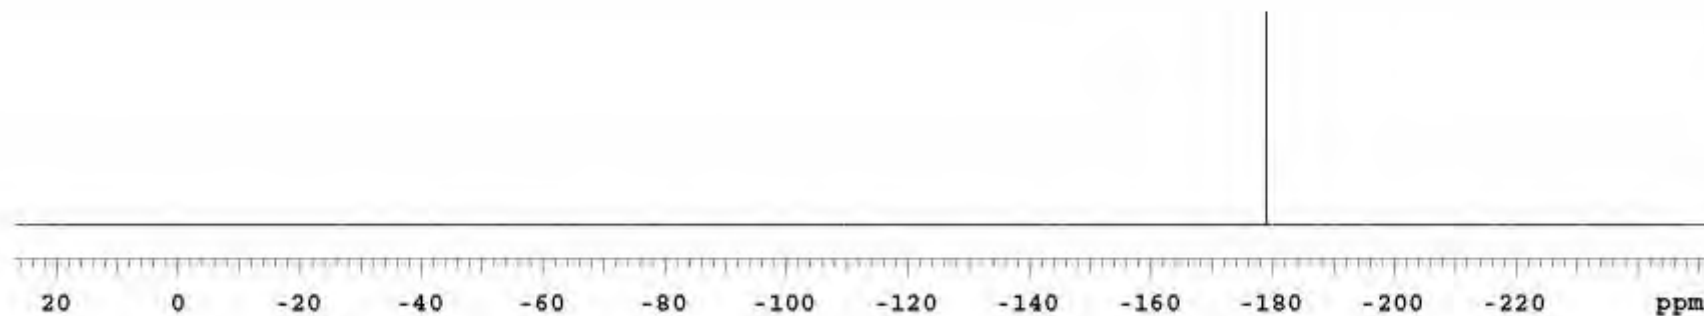

**$^{13}\text{C}$  NMR of (3-Morpholino)phenyl-fluoroacetophenone (2g)**CDCl<sub>3</sub>, 25 °C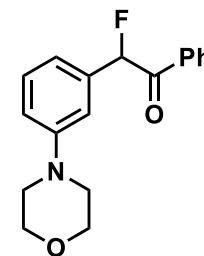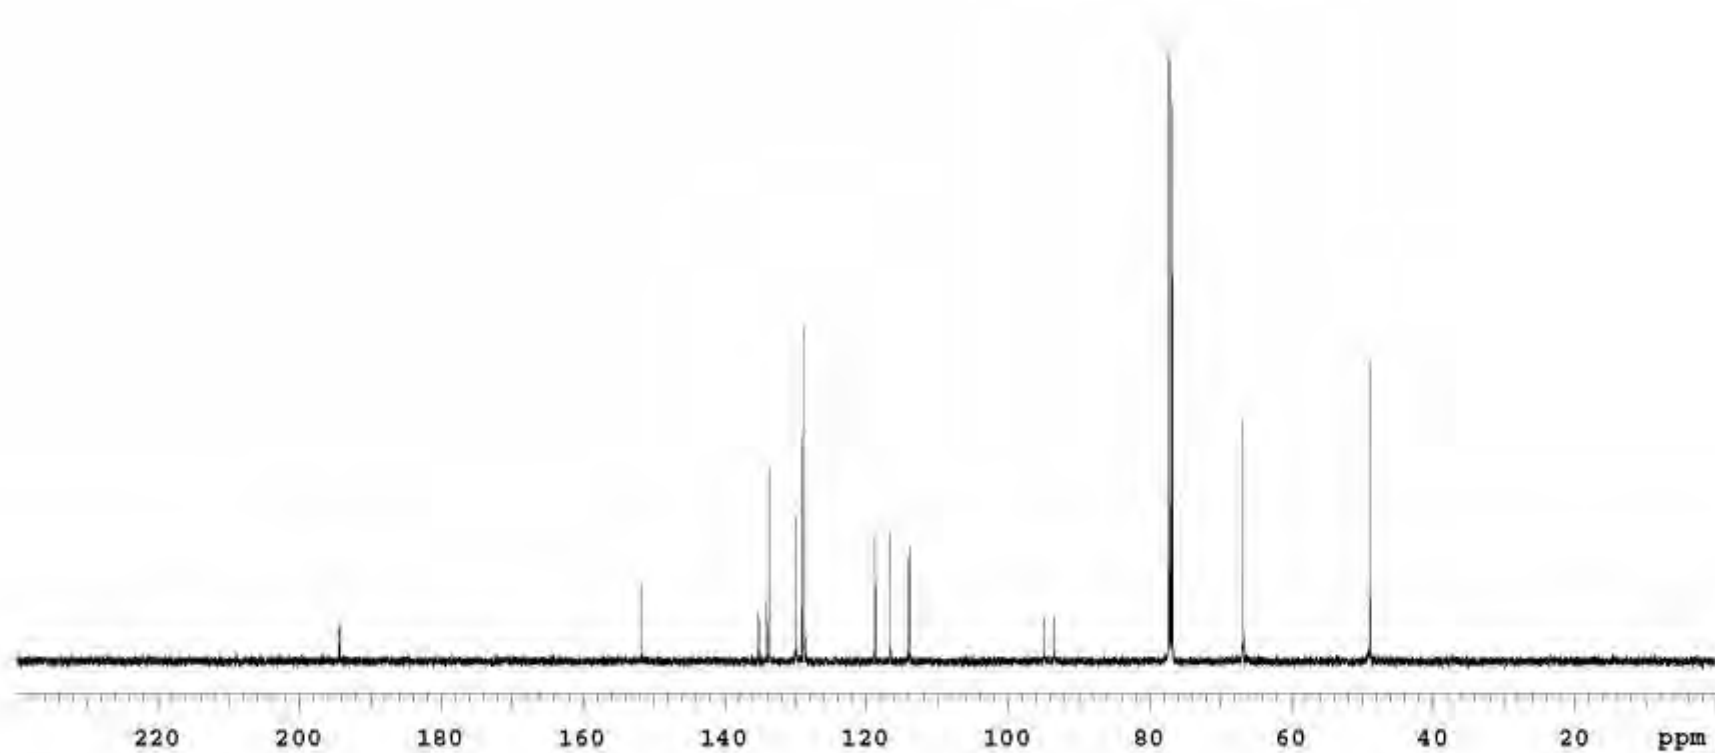

**$^1\text{H}$  NMR of (3-Nitro)phenyl-fluoroacetophenone (2h)**CDCl<sub>3</sub>, 23 °C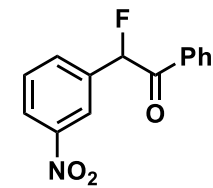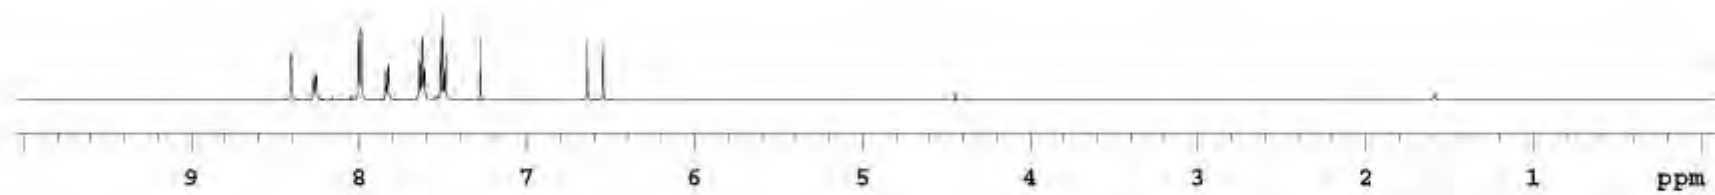

**$^{19}\text{F}$  NMR of (3-Nitro)phenyl-fluoroacetophenone (2h)**CDCl<sub>3</sub>, 23 °C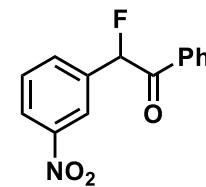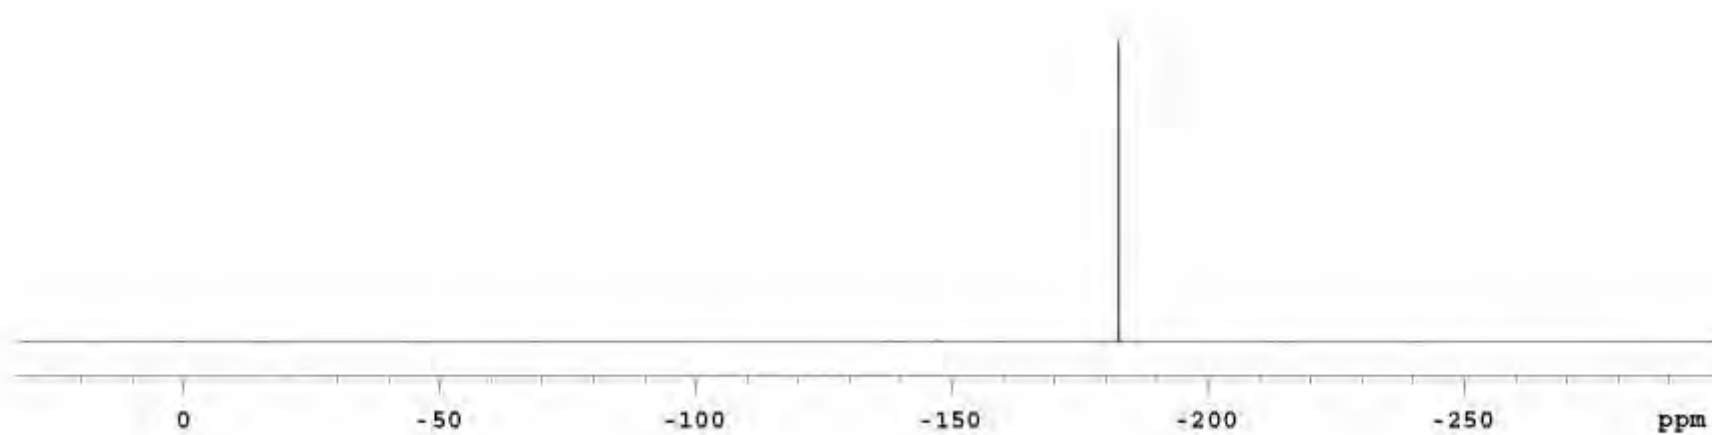



**$^{13}\text{C}$  NMR of (3-Nitro)phenyl-fluoroacetophenone (2h)**CDCl<sub>3</sub>, 25 °C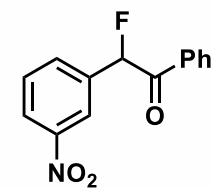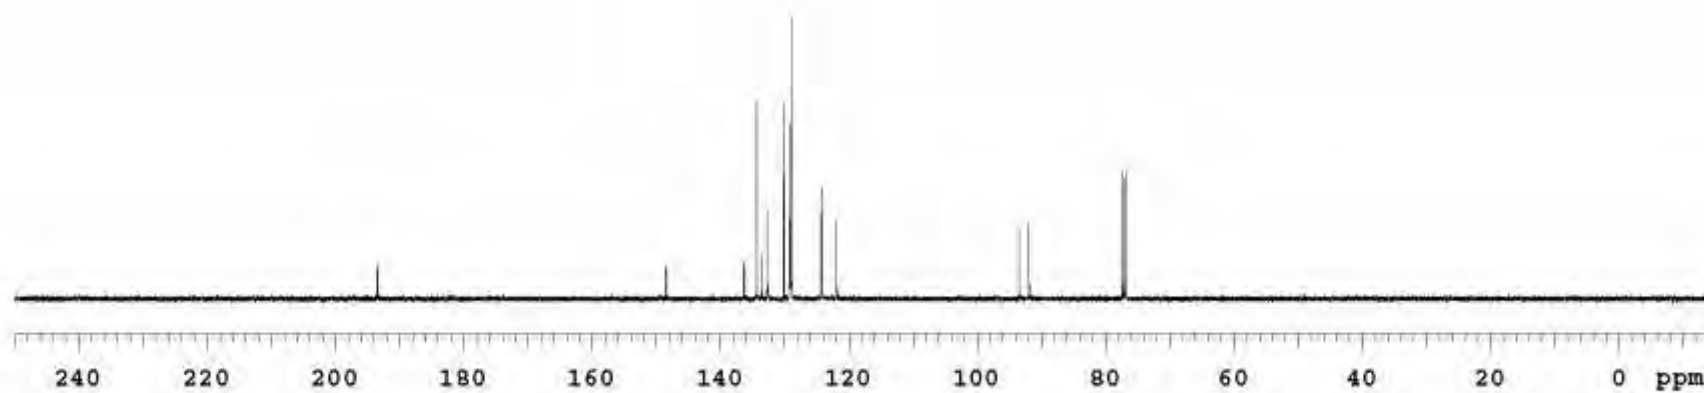

**$^1\text{H}$  NMR of Fluoren-9-onyl-fluoroacetophenone (2i)**CDCl<sub>3</sub>, 25 °C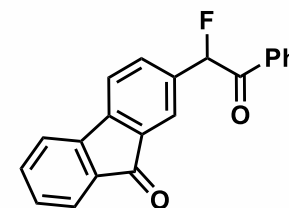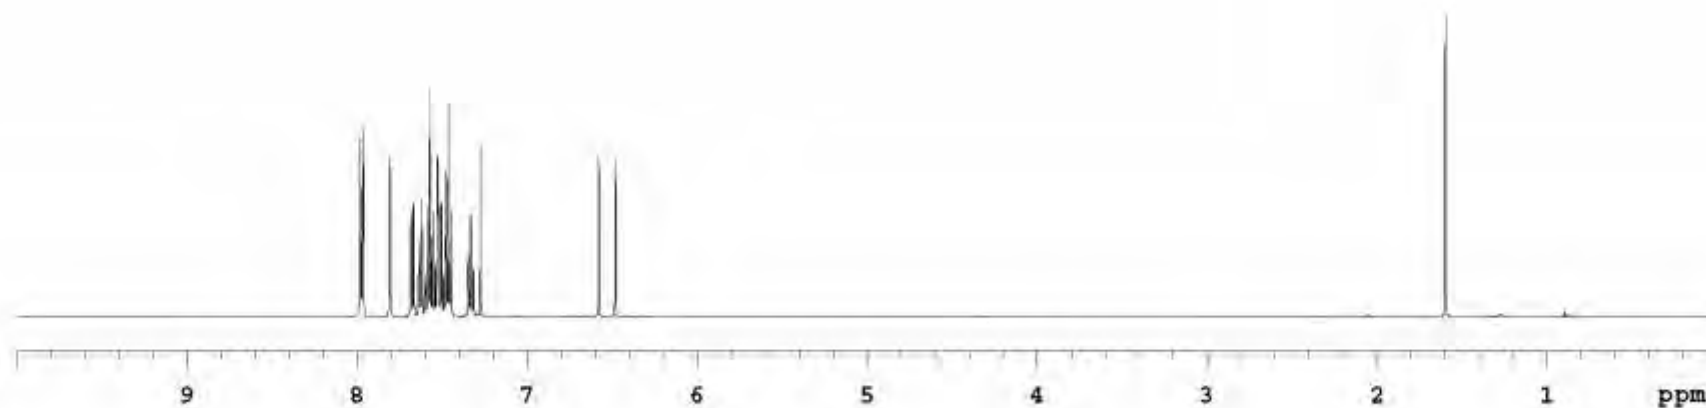

**$^{19}\text{F}$  NMR of Fluoren-9-onyl-fluoroacetophenone (2i)**CDCl<sub>3</sub>, 25 °C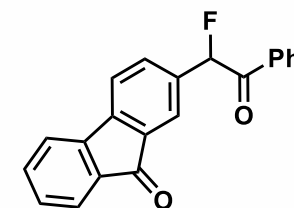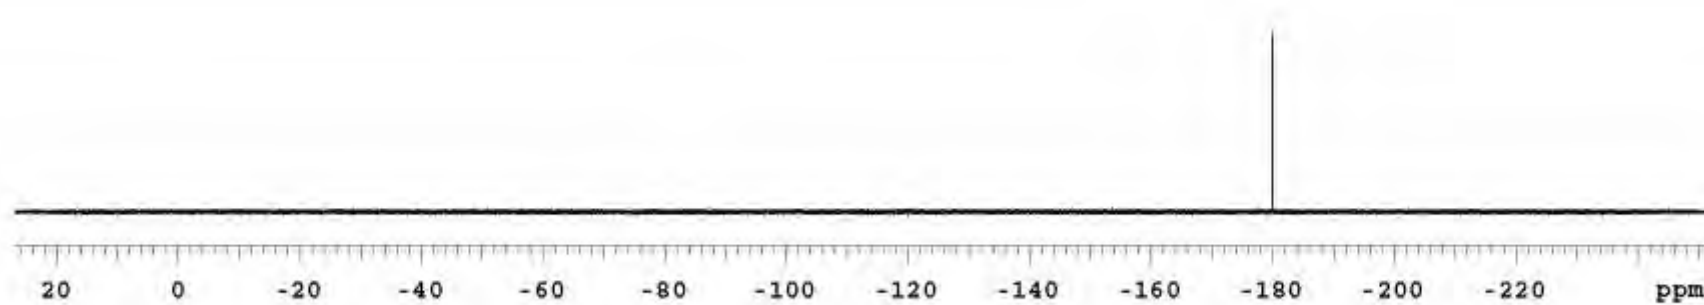

**$^{13}\text{C}$  NMR of Fluoren-9-onyl-fluoroacetophenone (2i)**CDCl<sub>3</sub>, 25 °C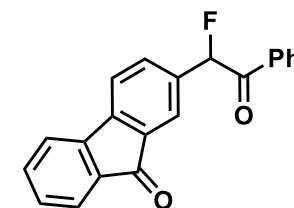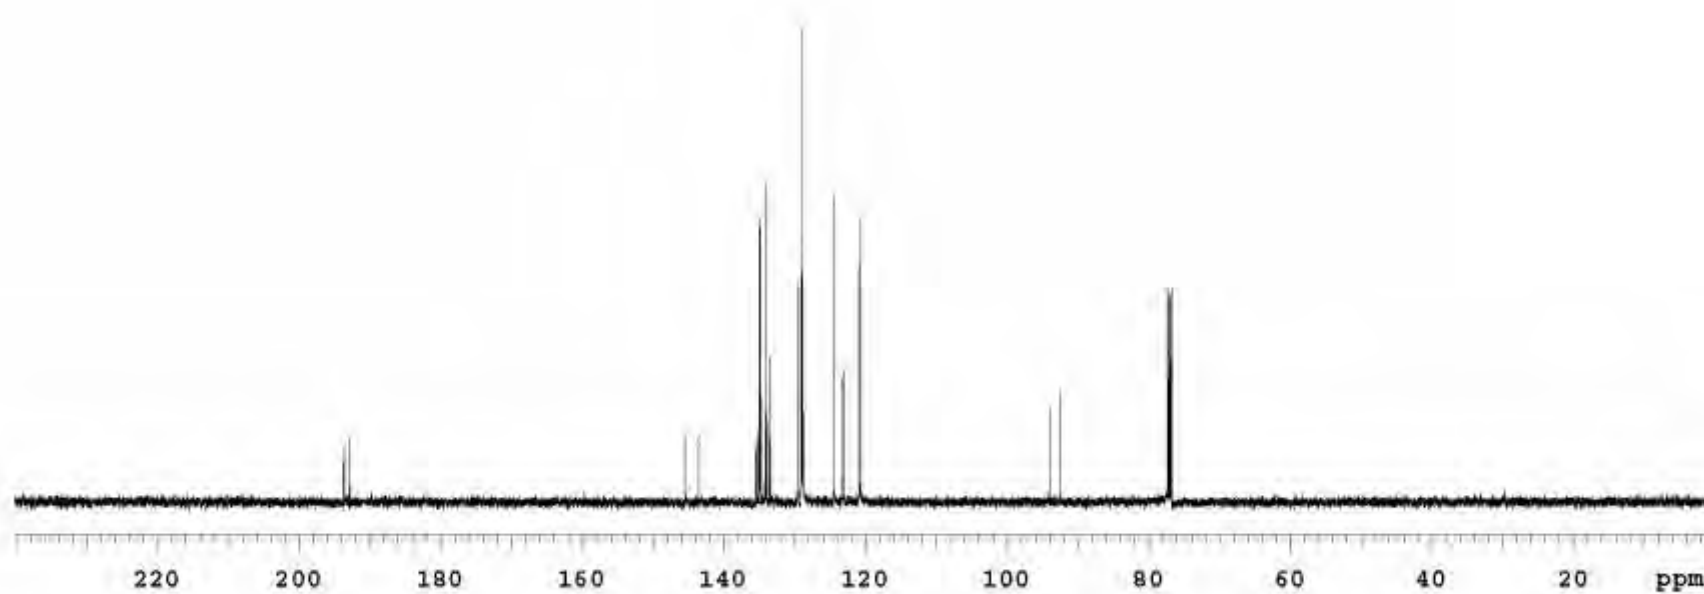

**$^1\text{H}$  NMR of (4-Ethyl-carboxyl)phenyl-fluoroacetophenone (2j)**CDCl<sub>3</sub>, 23 °C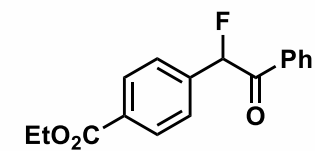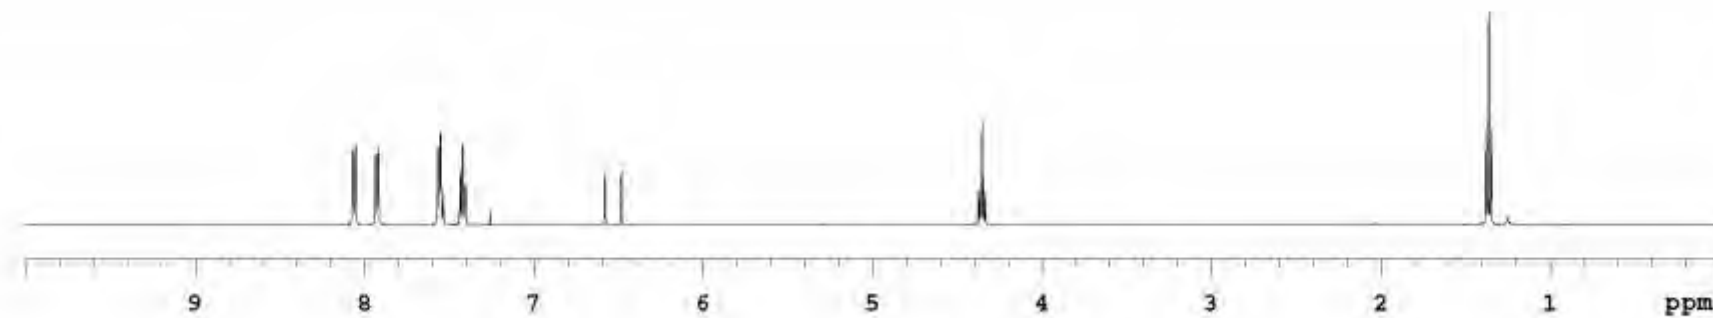

**$^{19}\text{F}$  NMR of (4-Ethyl-carboxyl)phenyl-fluoroacetophenone (2j)**CDCl<sub>3</sub>, 23 °C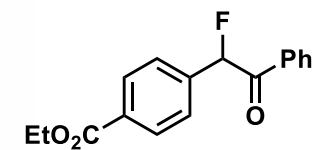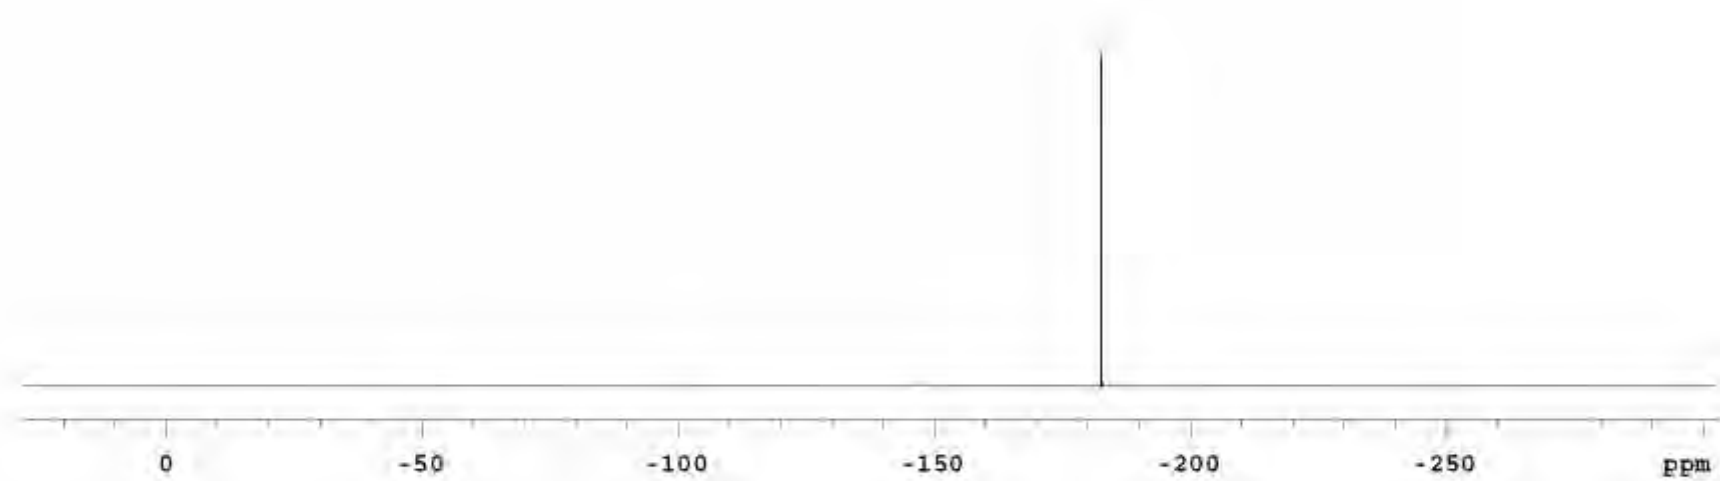

**$^{13}\text{C}$  NMR of (4-Ethyl-carboxyl)phenyl-fluoroacetophenone (2j)**CDCl<sub>3</sub>, 25 °C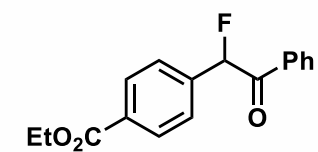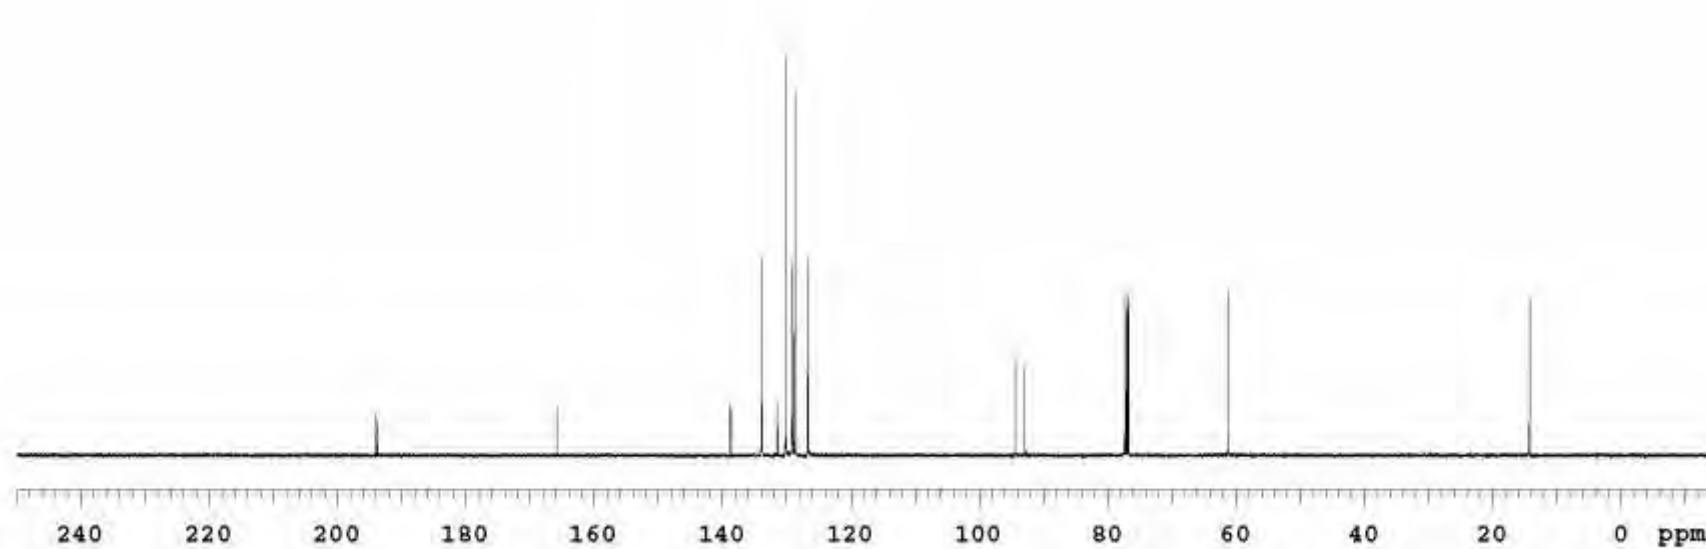

**$^1\text{H}$  NMR of (3-Dioxolanyl)phenyl-fluoroacetophenone (S1)**CDCl<sub>3</sub>, 25 °C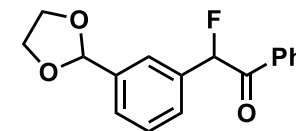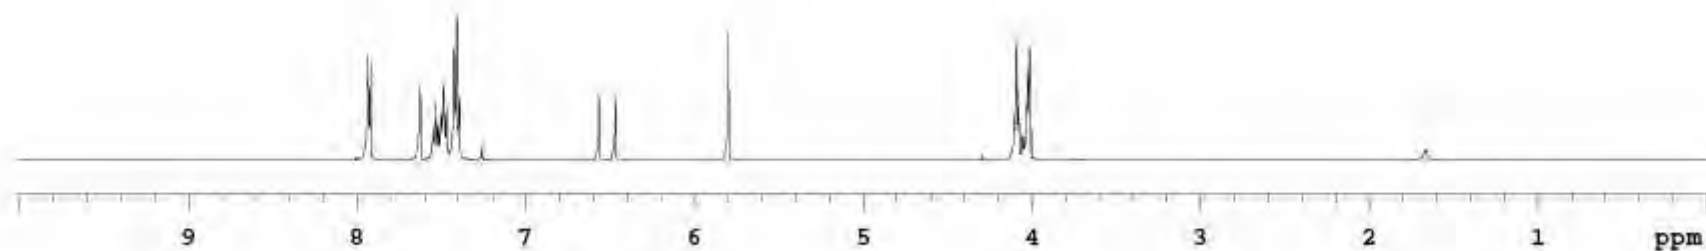



**$^{19}\text{F}$  NMR of (3-Dioxolanyl)phenyl-fluoroacetophenone (S1)**CDCl<sub>3</sub>, 25 °C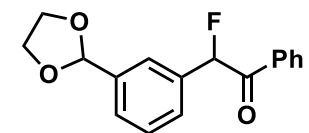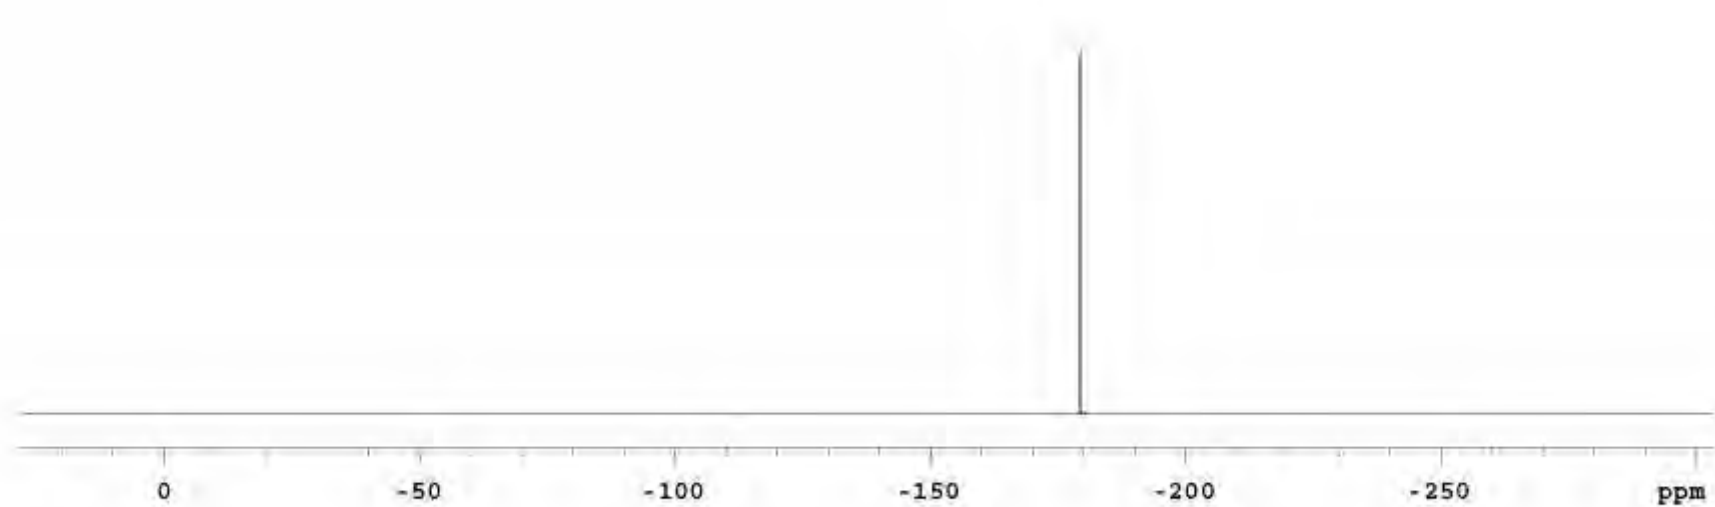

**$^{13}\text{C}$  NMR of (3-Dioxolanyl)phenyl-fluoroacetophenone (S1)**CDCl<sub>3</sub>, 23 °C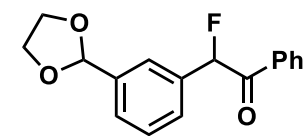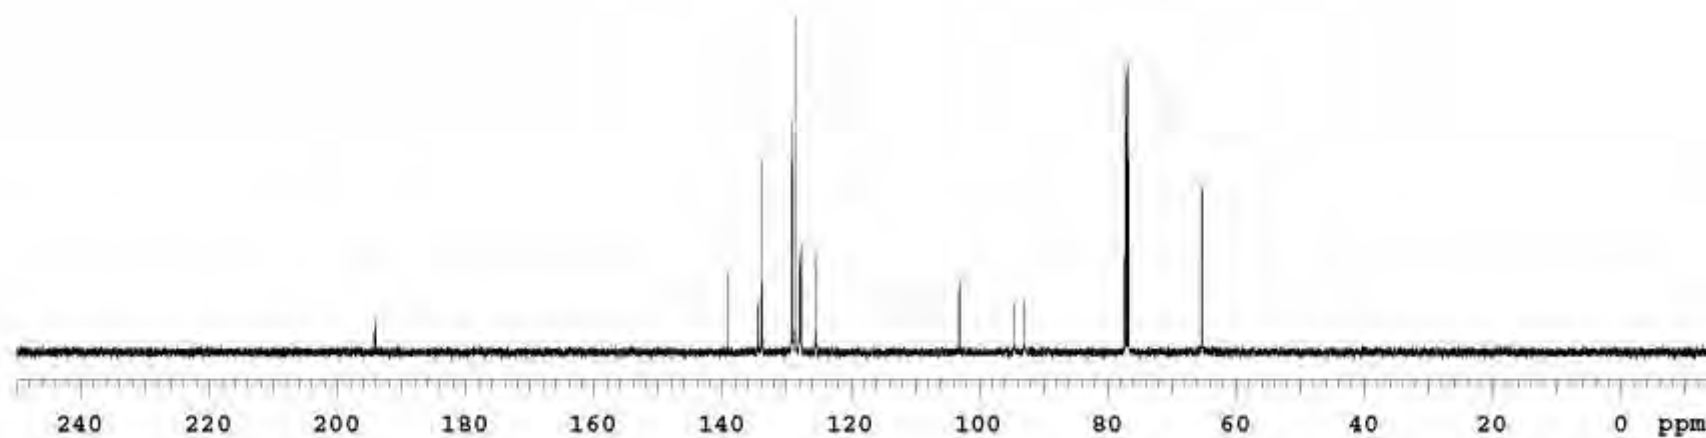

**$^1\text{H}$  NMR of (3-Formyl)phenyl-fluoroacetophenone (2k)**CDCl<sub>3</sub>, 25 °C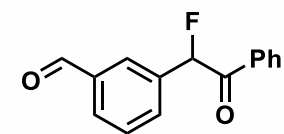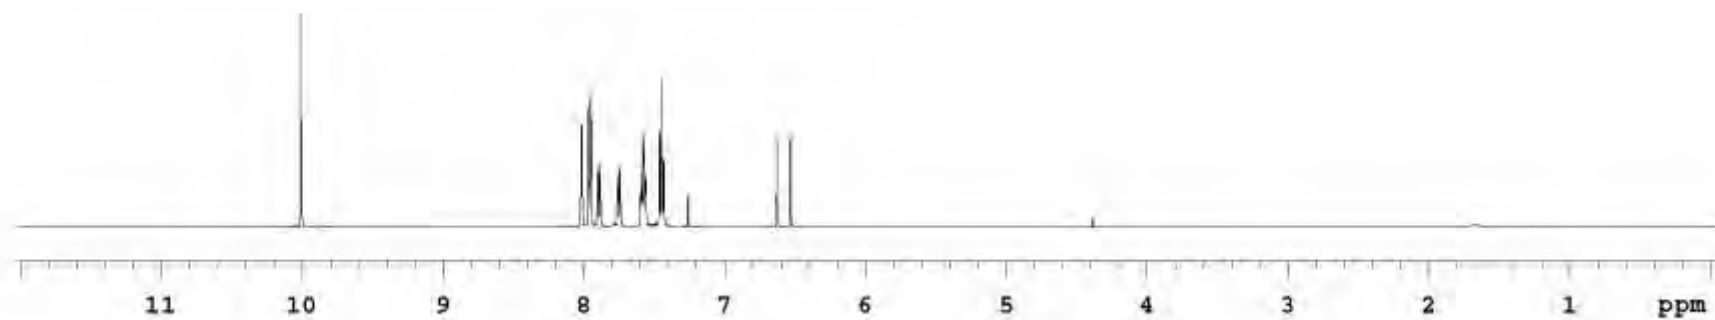

**$^{19}\text{F}$  NMR of (3-Formyl)phenyl-fluoroacetophenone (2k)**CDCl<sub>3</sub>, 25 °C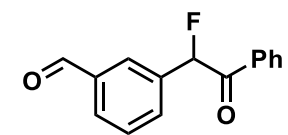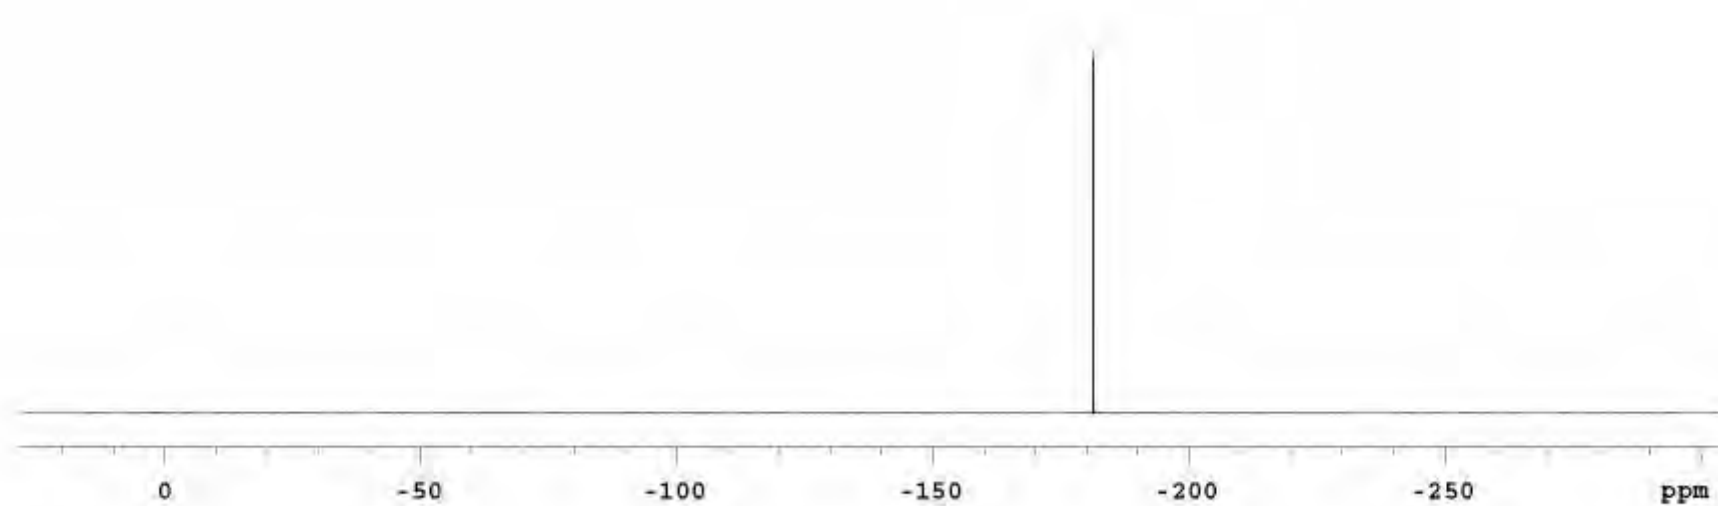

**$^{13}\text{C}$  NMR of (3-Formyl)phenyl-fluoroacetophenone (2k)**CDCl<sub>3</sub>, 23 °C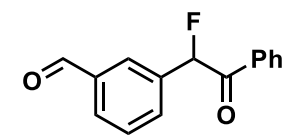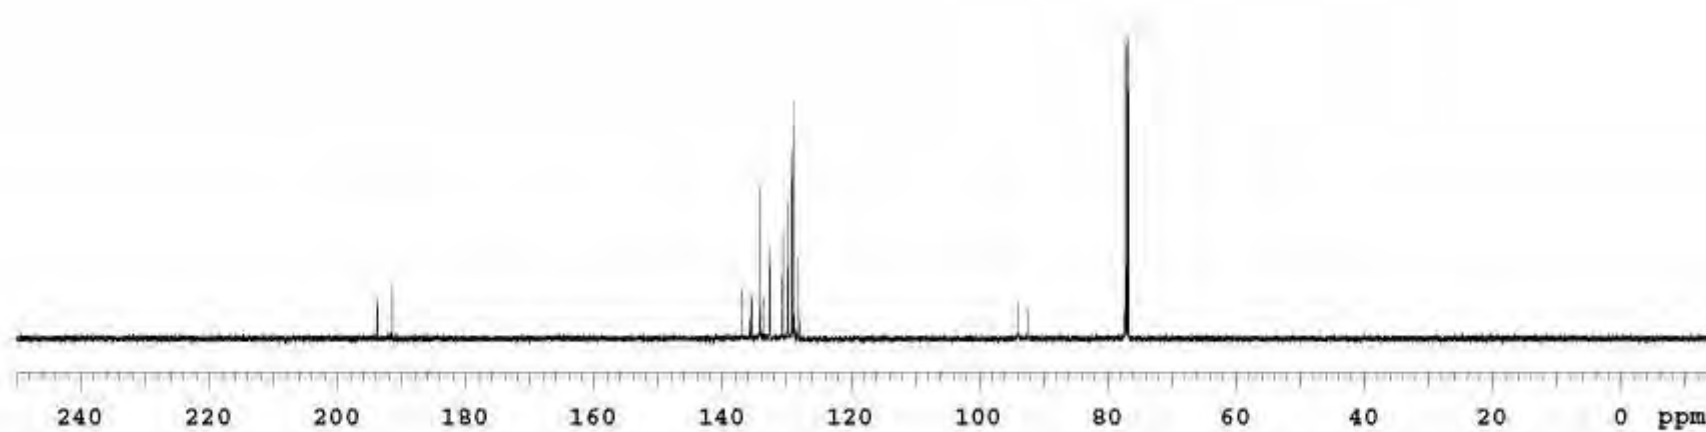

**<sup>1</sup>H NMR of (2-Chlorophenylmethanonyl)phenyl-fluoroacetophenone (2I)**CDCl<sub>3</sub>, 25 °C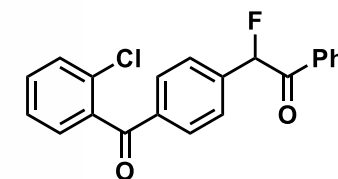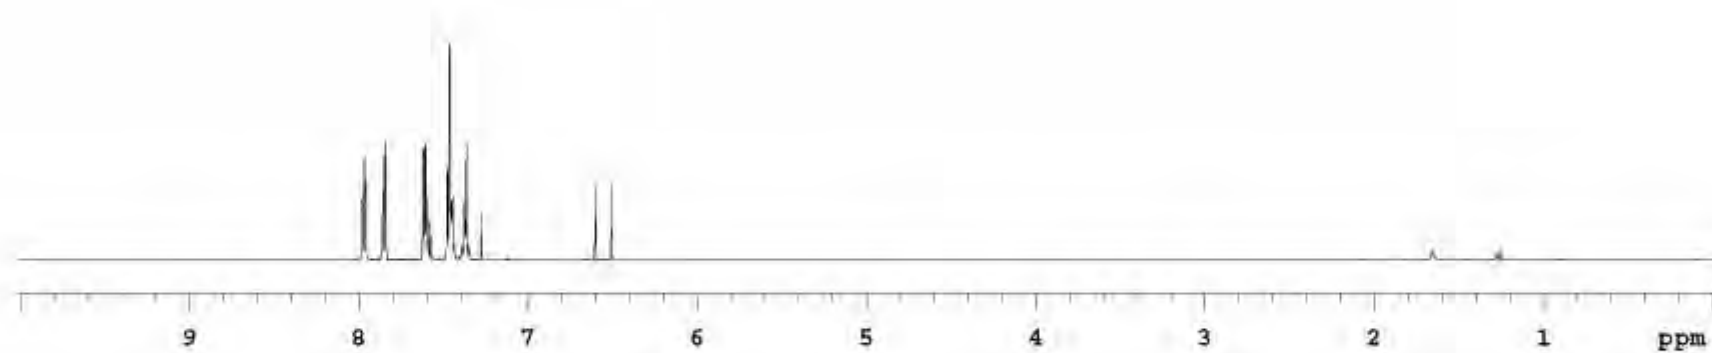

**$^{19}\text{F}$  NMR of (2-Chlorophenylmethanonyl)phenyl-fluoroacetophenone (2I)**CDCl<sub>3</sub>, 23 °C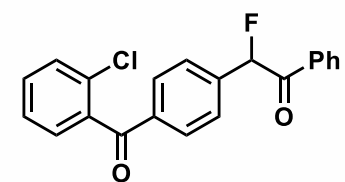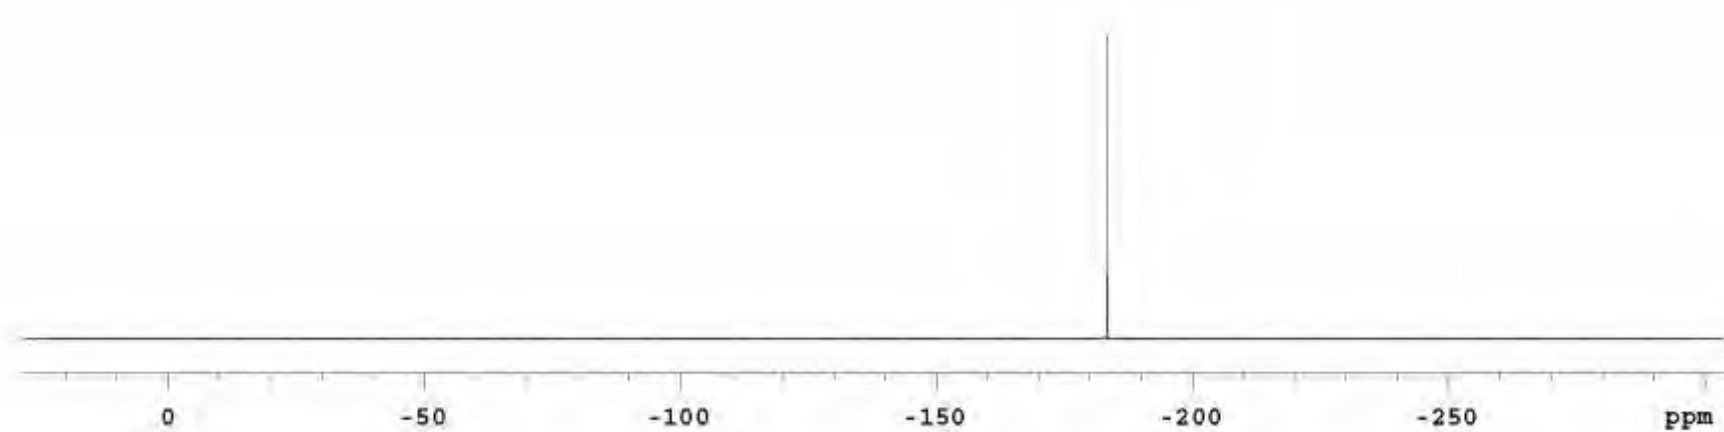

**$^{13}\text{C}$  NMR of (2-Chlorophenylmethanonyl)phenyl-fluoroacetophenone (2l)**CDCl<sub>3</sub>, 25 °C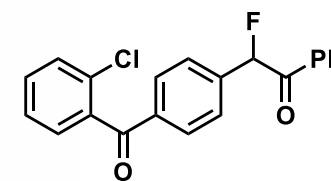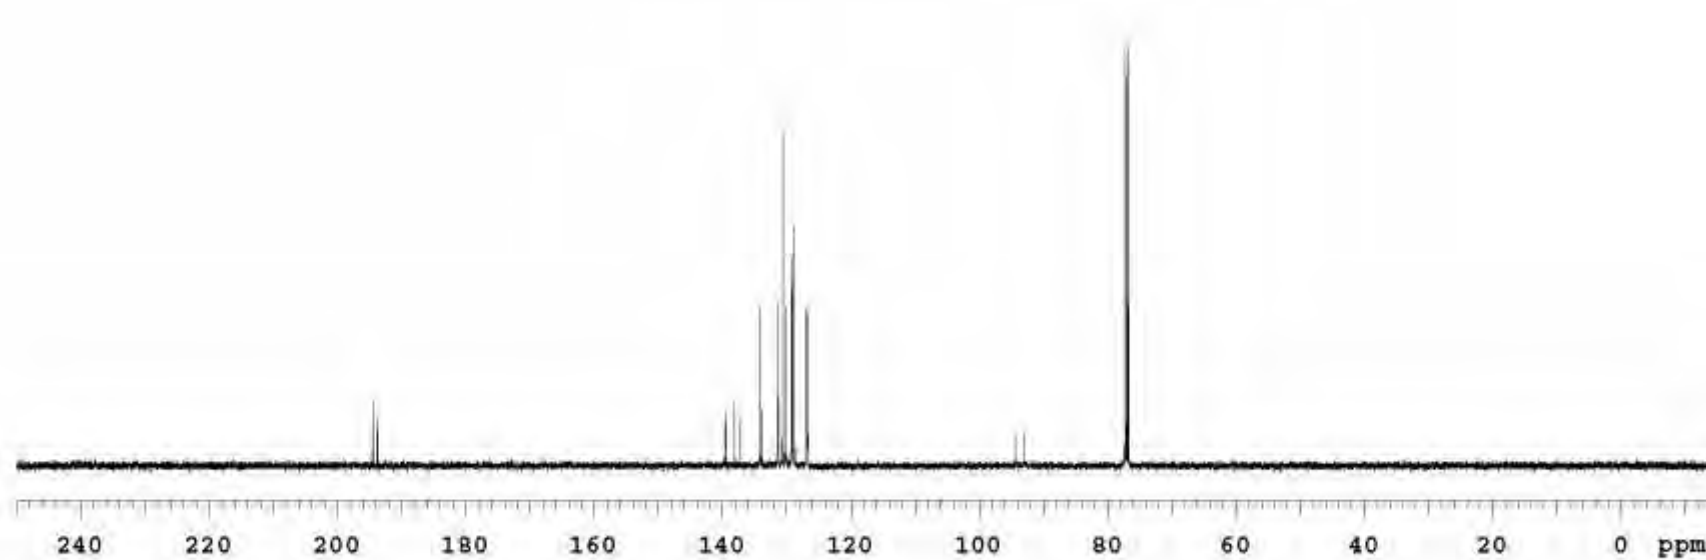



**$^1\text{H}$  NMR of Quinoline-6-fluoroacetophenone (2m)**CDCl<sub>3</sub>, 24 °C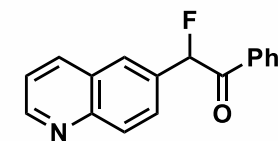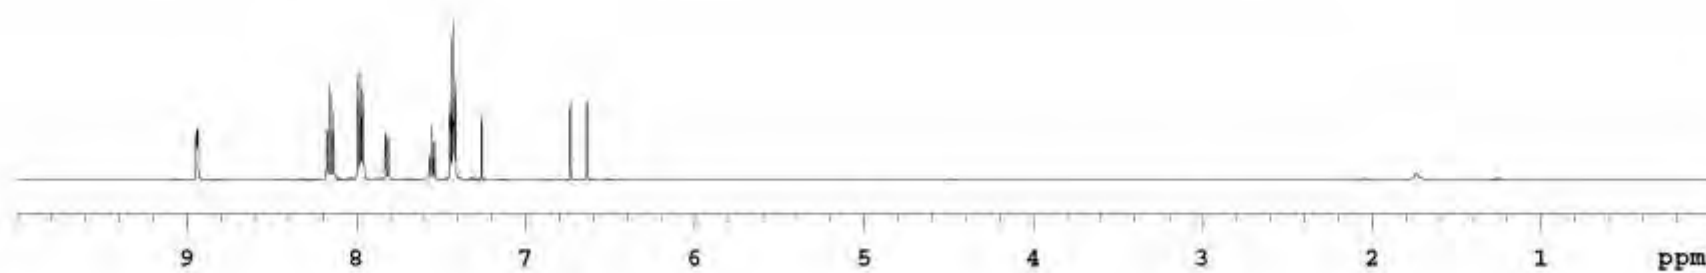

**$^{19}\text{F}$  NMR of Quinoline-6-fluoroacetophenone (2m)**CDCl<sub>3</sub>, 24 °C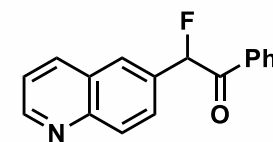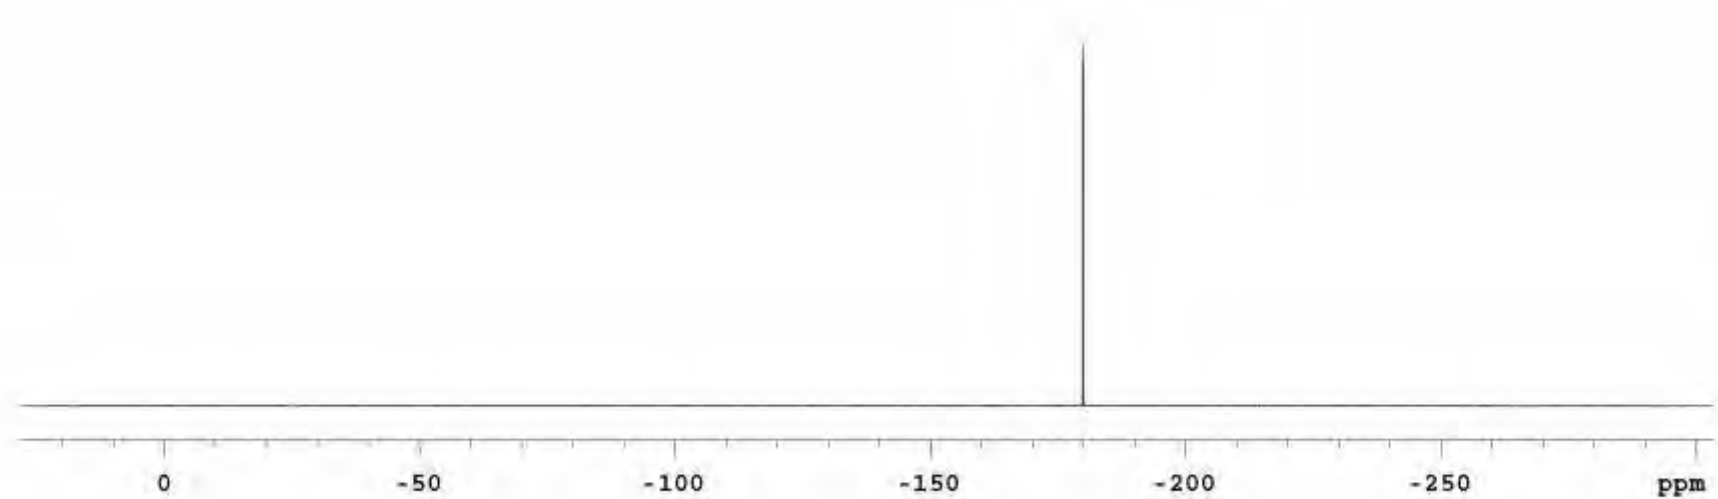

**$^{13}\text{C}$  NMR of Quinoline-6-fluoroacetophenone (2m)**CDCl<sub>3</sub>, 25 °C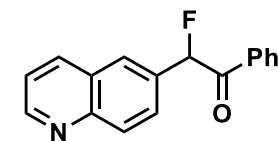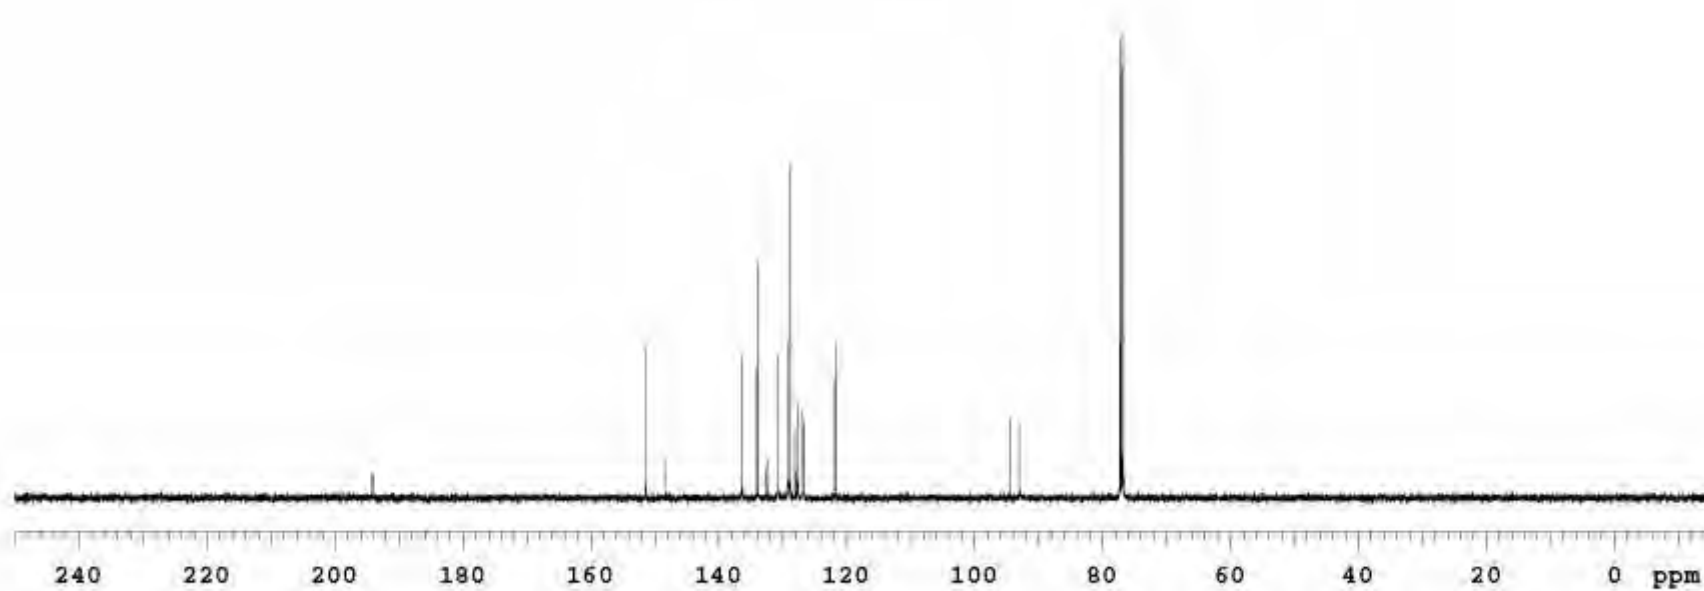

**<sup>1</sup>H NMR of (2-Methylbenzo[d]thiazol-5-yl)-fluoroacetophenone (2n)**CDCl<sub>3</sub>, 25 °C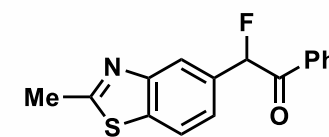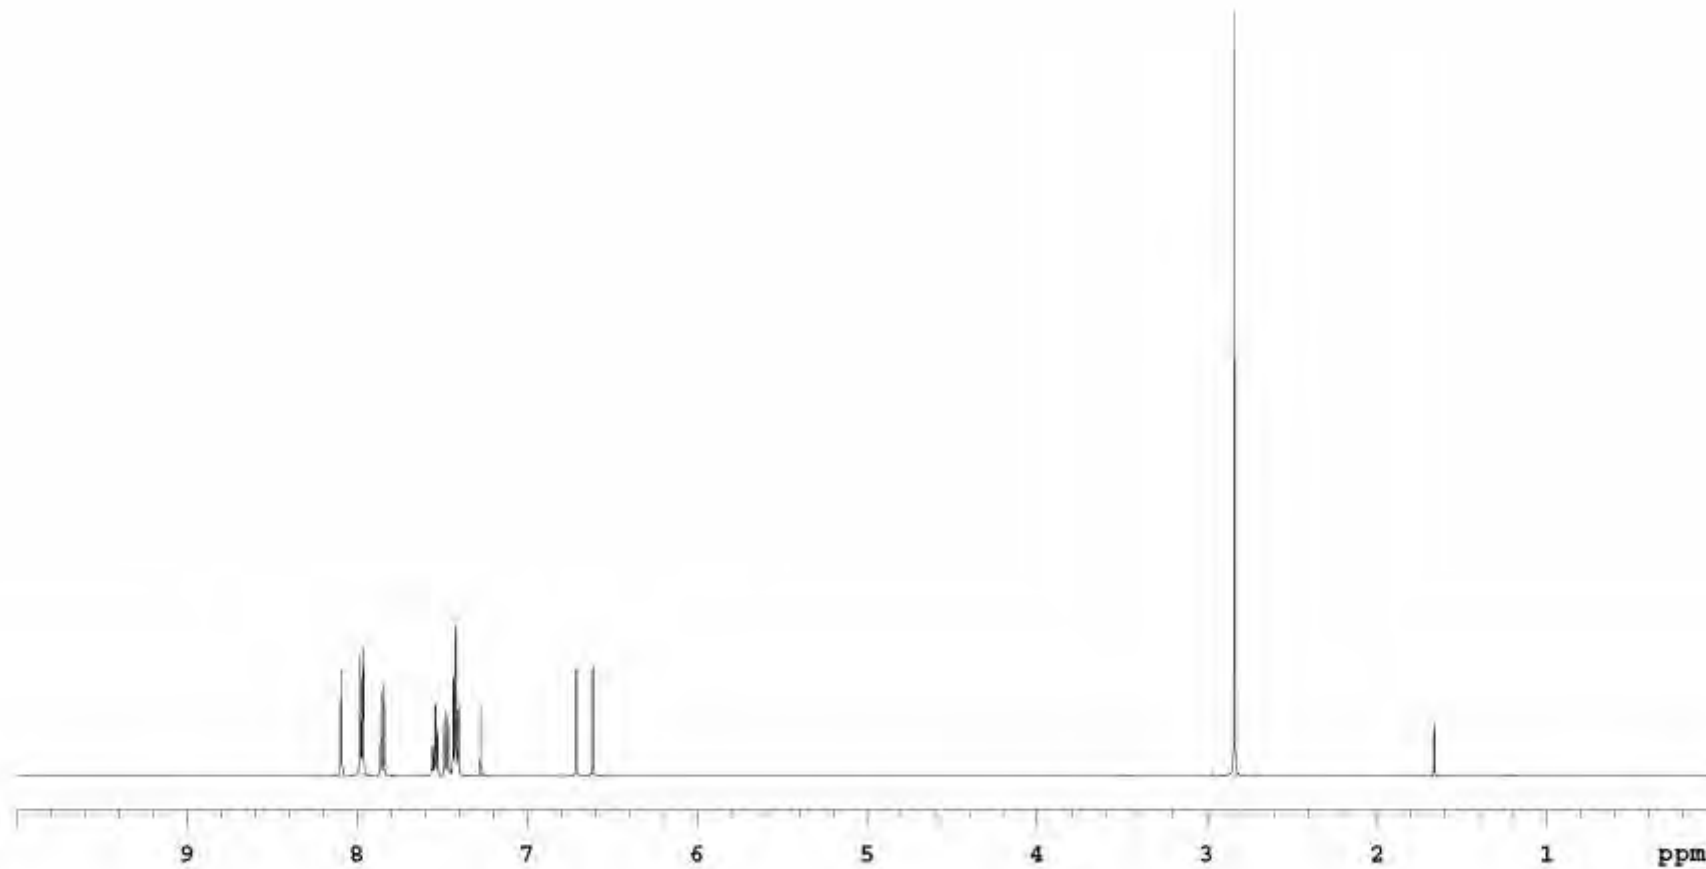

**<sup>19</sup>F NMR of (2-Methylbenzo[d]thiazol-5-yl)-fluoroacetophenone (2n)**CDCl<sub>3</sub>, 25 °C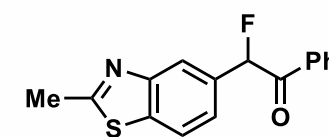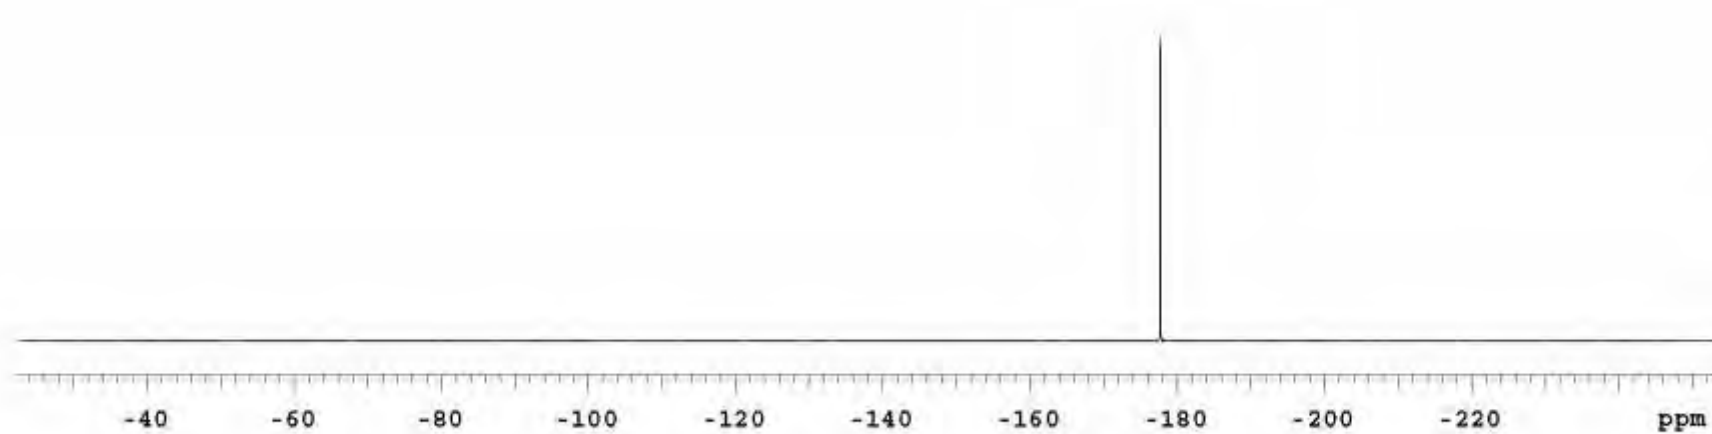

**$^{13}\text{C}$  NMR of (2-Methylbenzo[*d*]thiazol-5-yl)-fluoroacetophenone (2n)**CDCl<sub>3</sub>, 25 °C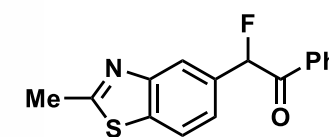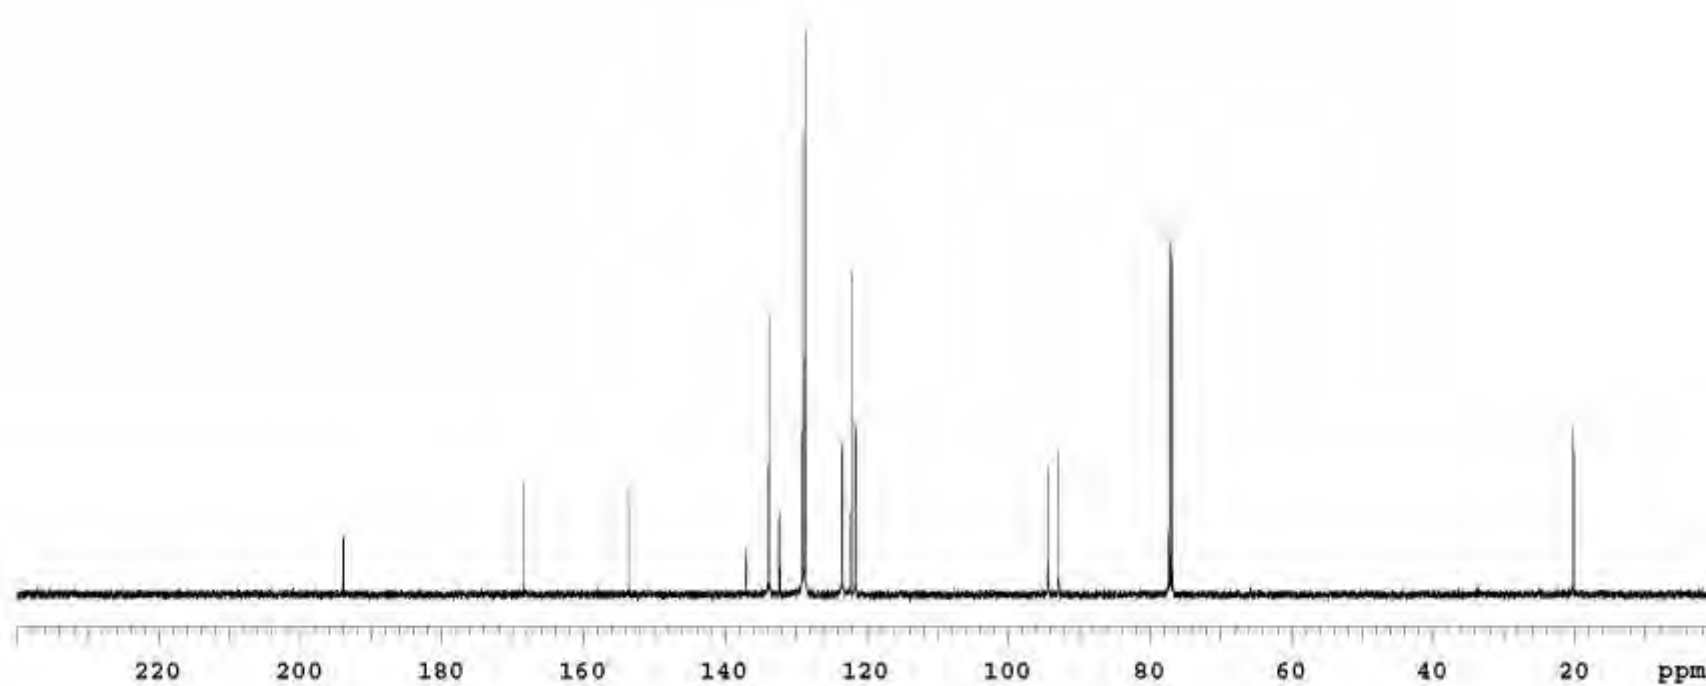

**<sup>1</sup>H NMR of Pyridine-3-fluoroacetophenone (2o)**CDCl<sub>3</sub>, 25 °C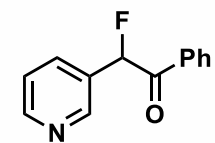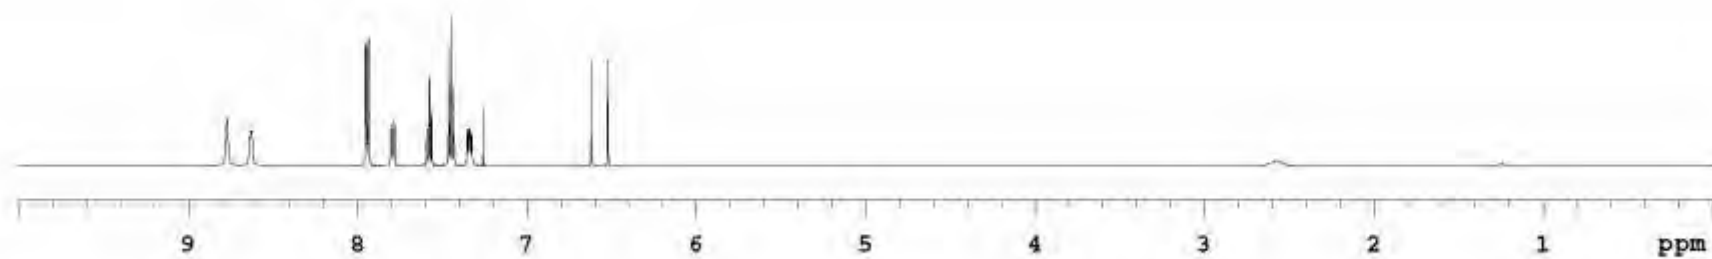

**<sup>19</sup>F NMR of Pyridine-3-fluoroacetophenone (2o)**CDCl<sub>3</sub>, 25 °C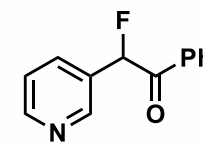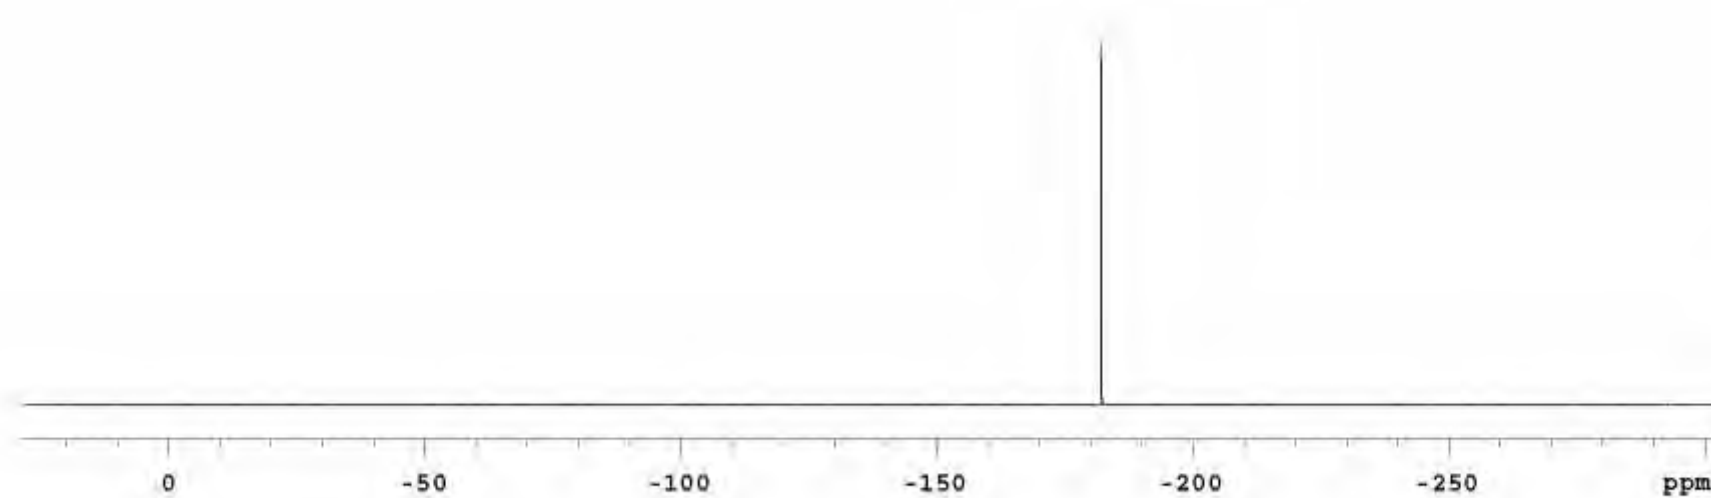



**$^{13}\text{C}$  NMR of Pyridine-3-fluoroacetophenone (2o)**CDCl<sub>3</sub>, 23 °C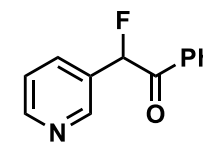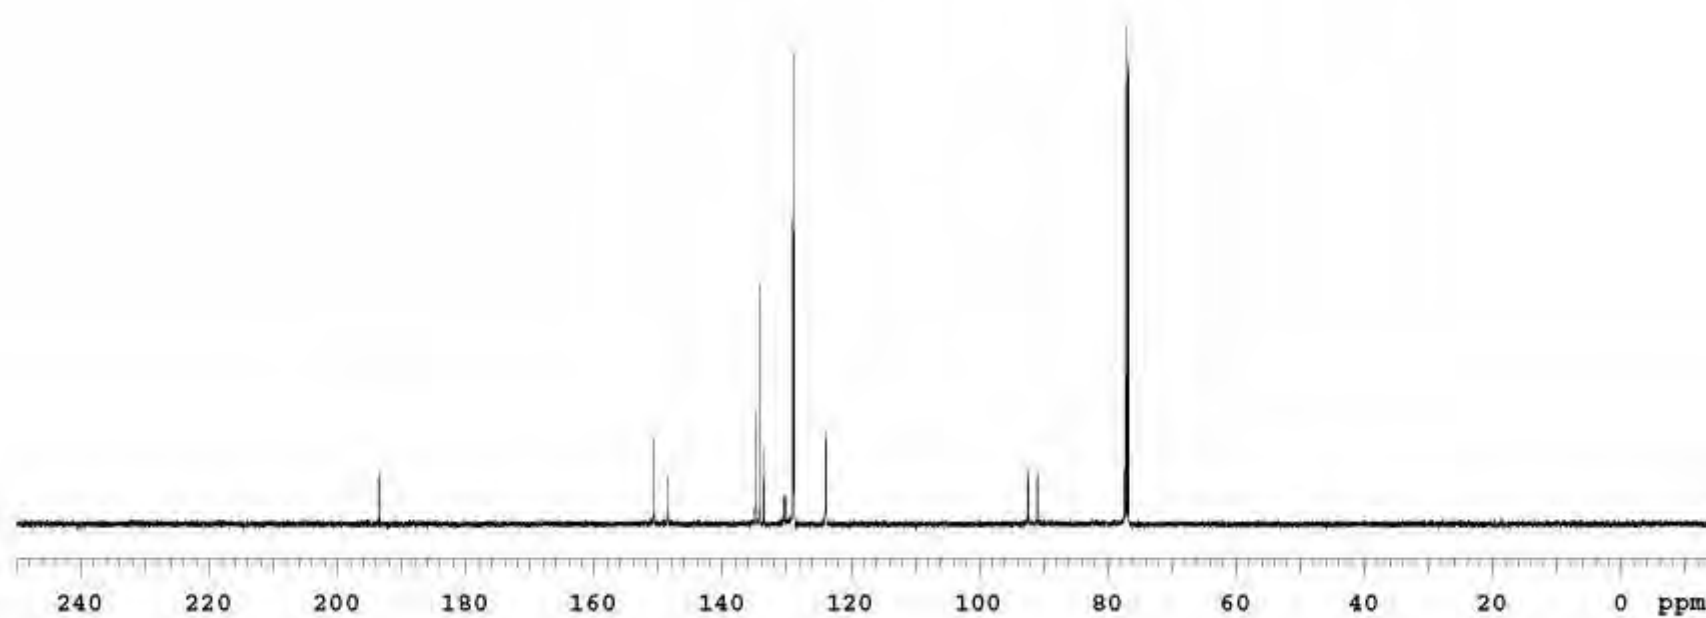

**$^1\text{H}$  NMR of Quinoline-3-fluoroacetophenone (2p)**CDCl<sub>3</sub>, 22 °C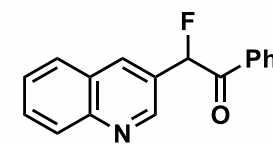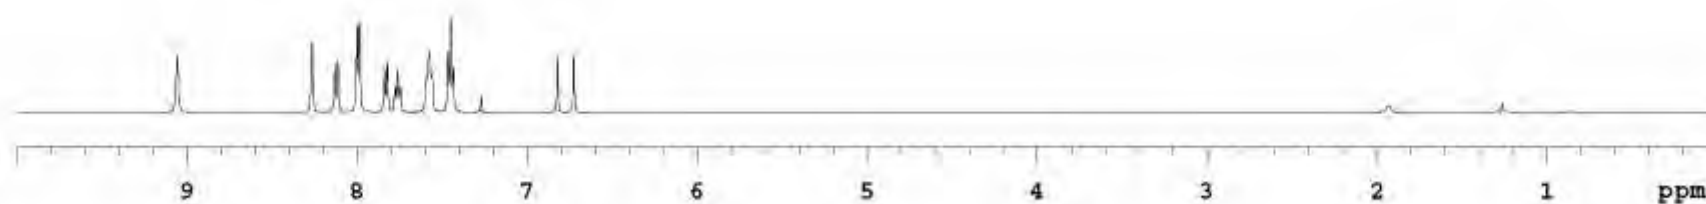

**$^{19}\text{F}$  NMR of Quinoline-3-fluoroacetophenone (2p)**CDCl<sub>3</sub>, 25 °C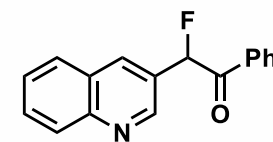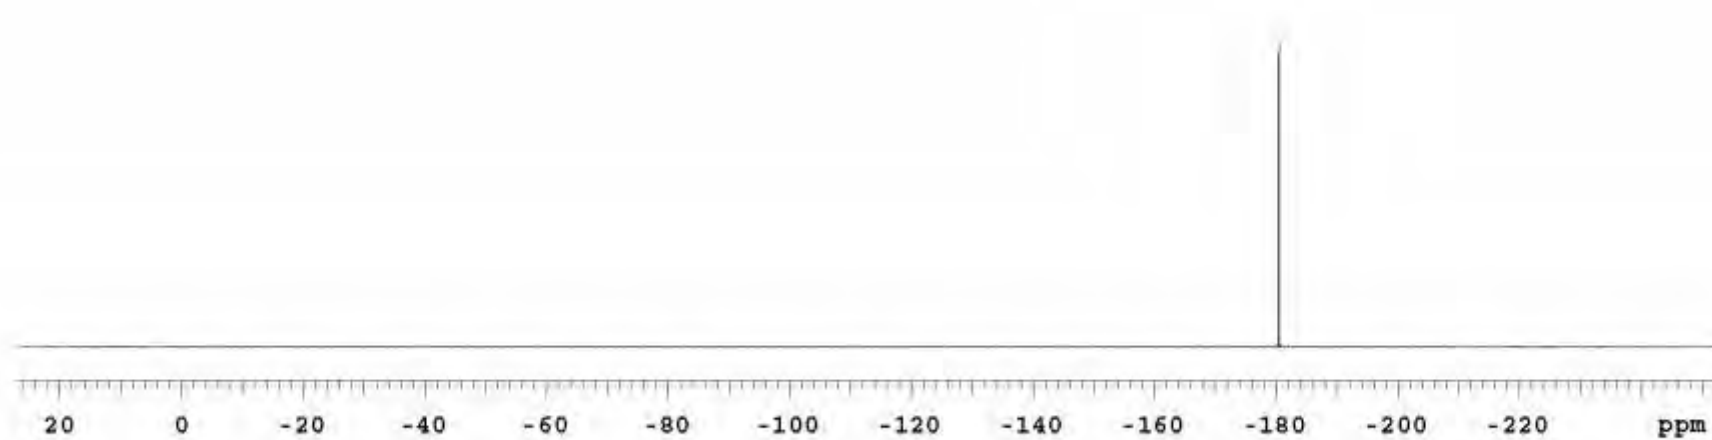

**$^{13}\text{C}$  NMR of Quinoline-3-fluoroacetophenone (2p)**CDCl<sub>3</sub>, 25 °C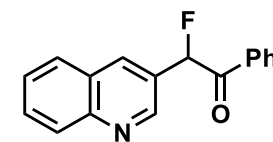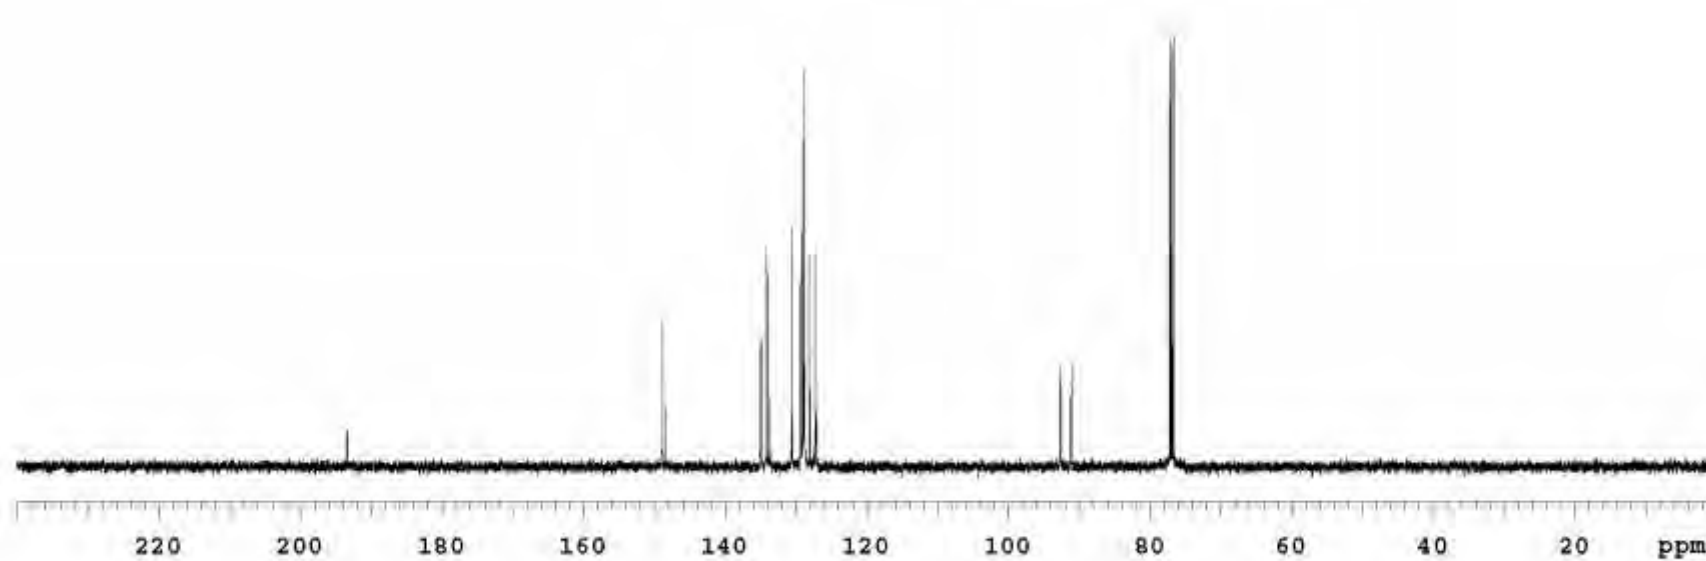

**$^1\text{H}$  NMR of (3-Morpholinomethyl)phenyl-fluoroacetophenone (2q)**CDCl<sub>3</sub>, 25 °C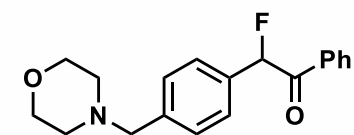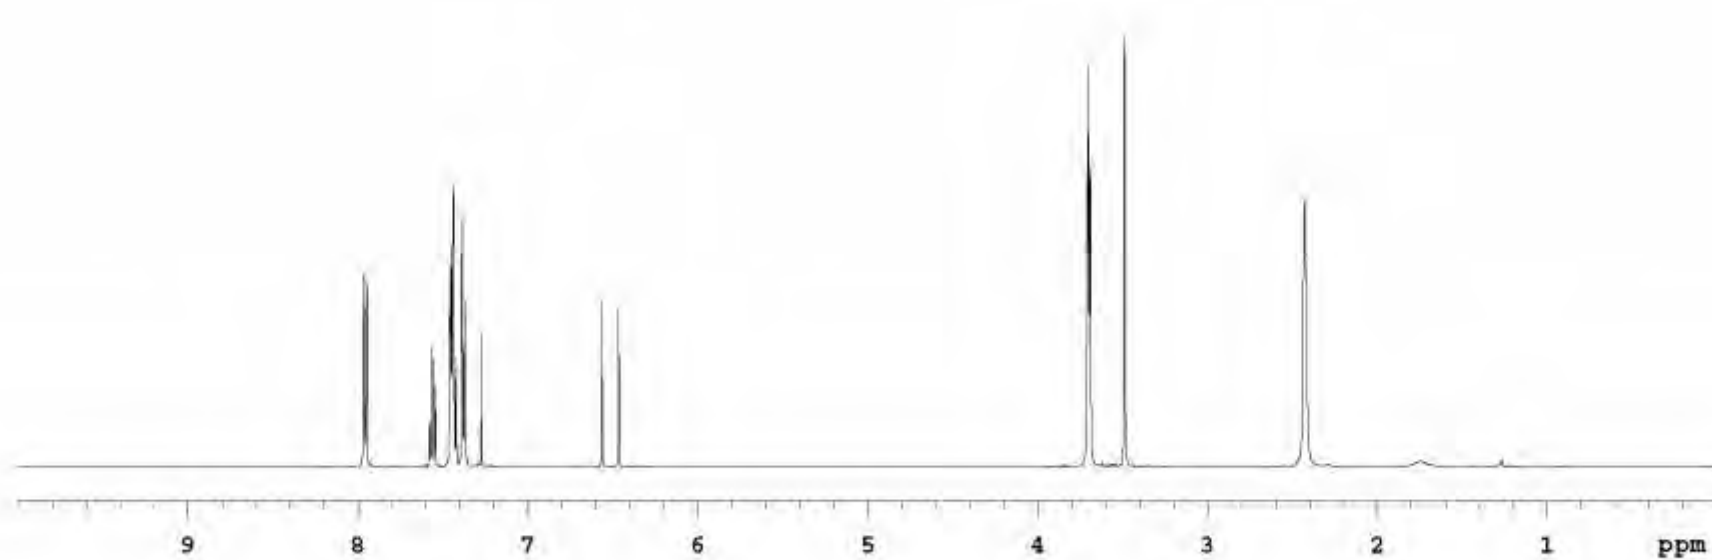

**$^{19}\text{F}$  NMR of (3-Morpholinomethyl)phenyl-fluoroacetophenone (2q)**CDCl<sub>3</sub>, 24 °C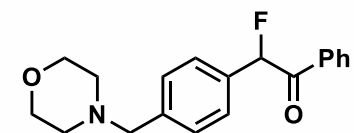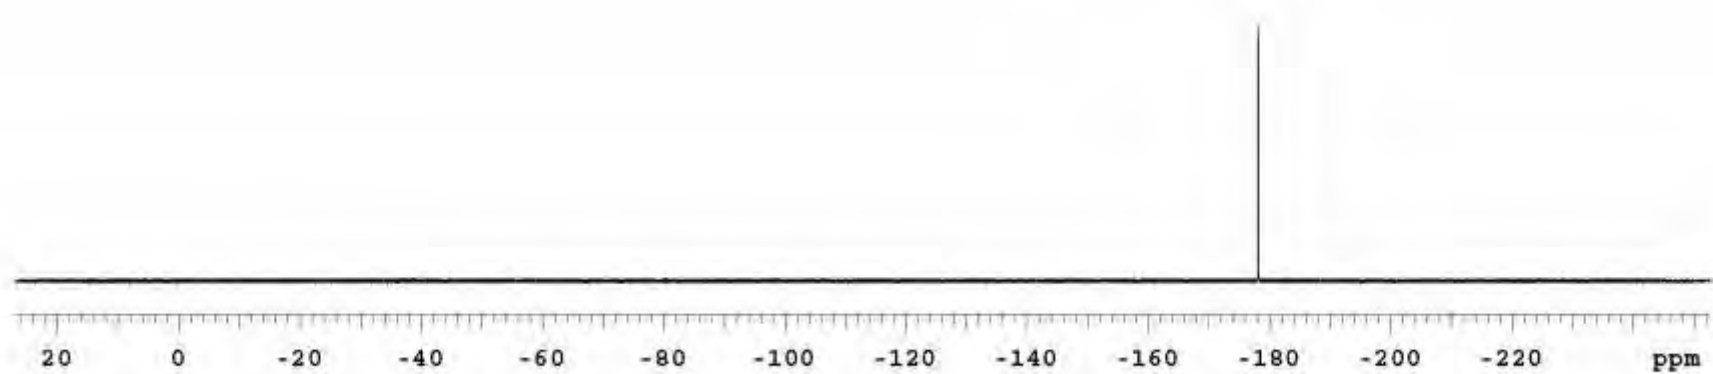

**$^{13}\text{C}$  NMR of (3-Morpholinomethyl)phenyl-fluoroacetophenone (2q)**CDCl<sub>3</sub>, 25 °C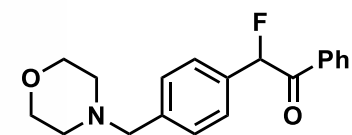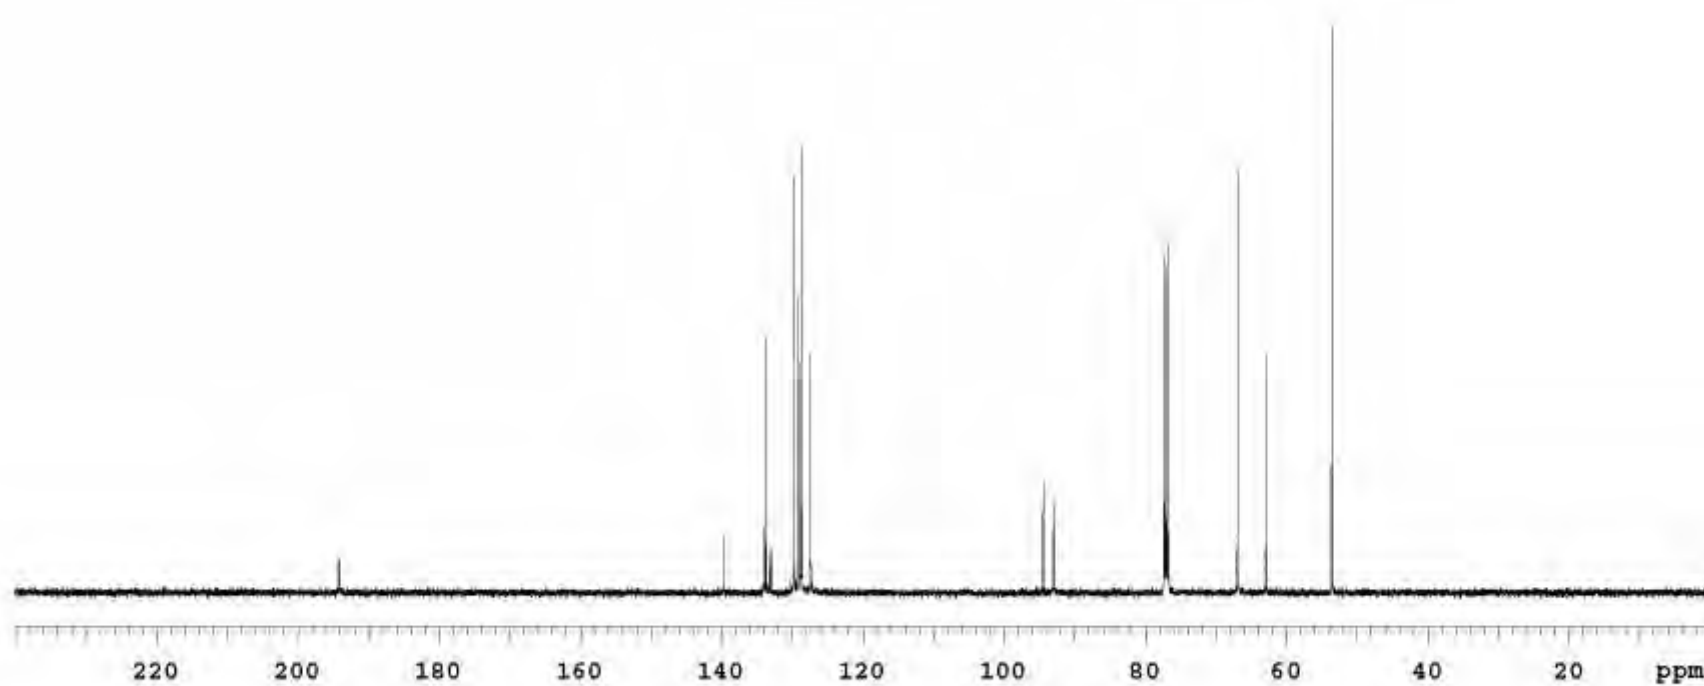

**$^1\text{H}$  NMR of Mesitylenyl-fluoroacetophenone (2s)**CDCl<sub>3</sub>, 25 °C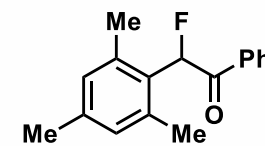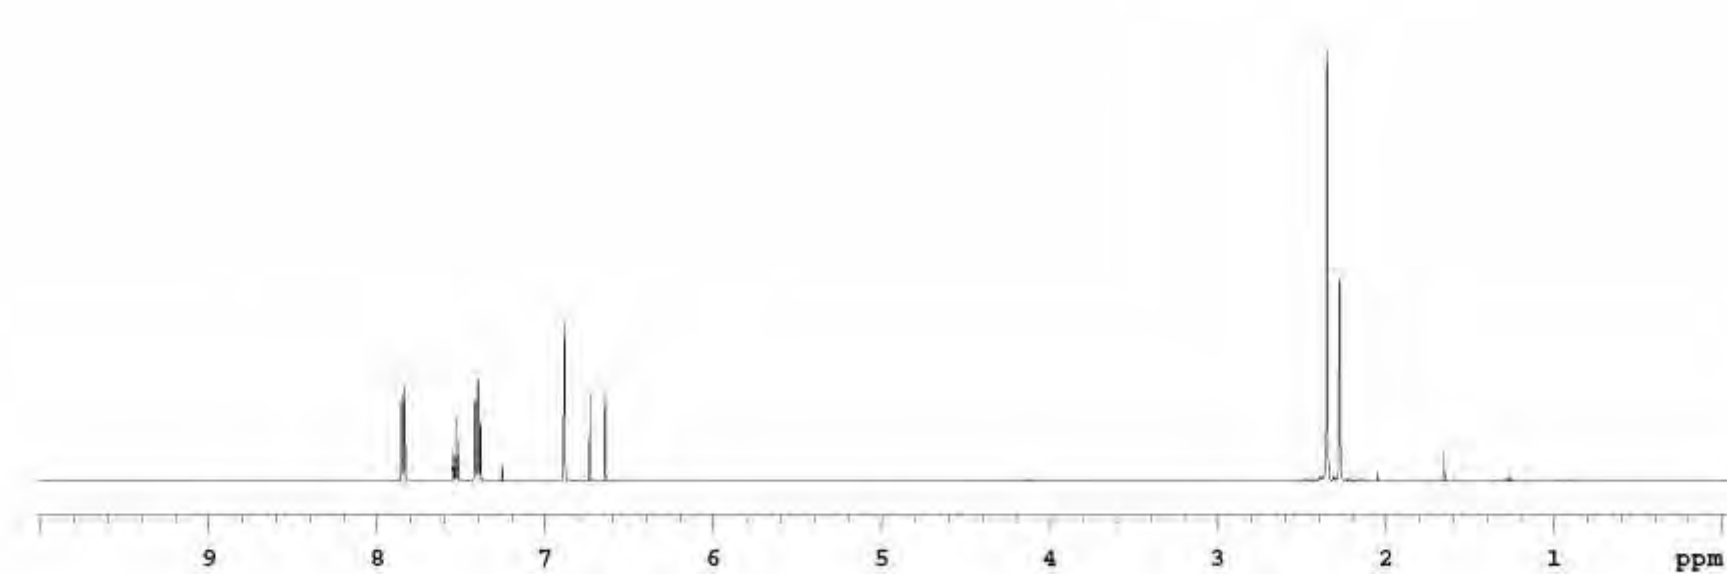



**$^{19}\text{F}$  NMR of Mesitylenyl-fluoroacetophenone (2s)**CDCl<sub>3</sub>, 25 °C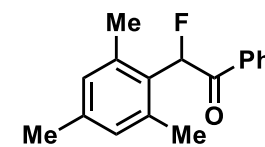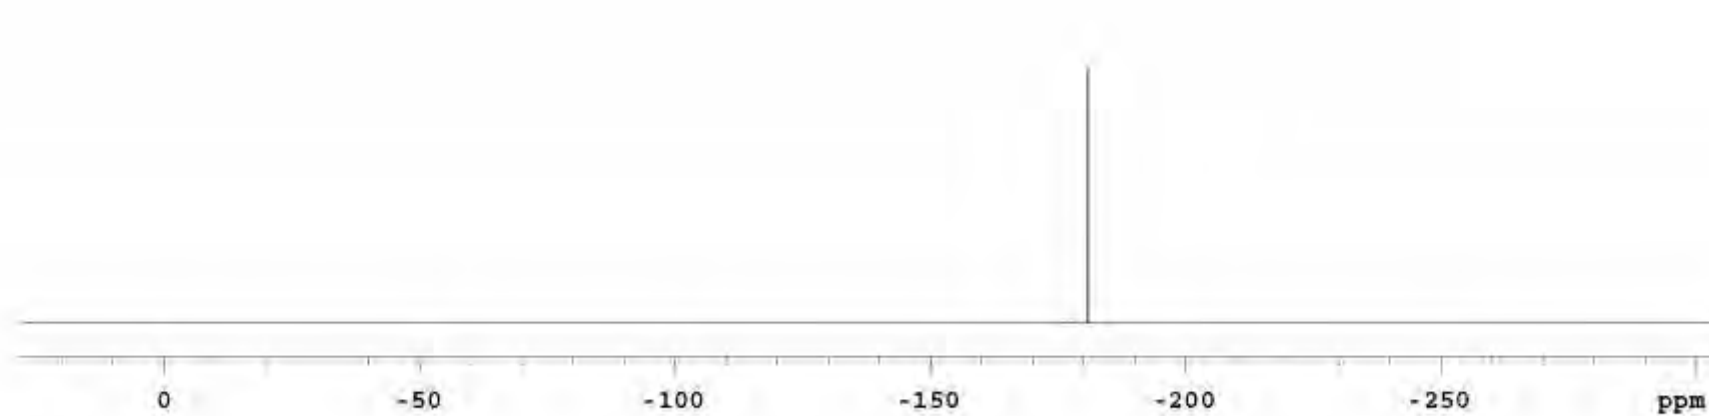

**$^{13}\text{C}$  NMR of Mesitylenyl-fluoroacetophenone (2s)**CDCl<sub>3</sub>, 23 °C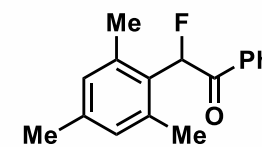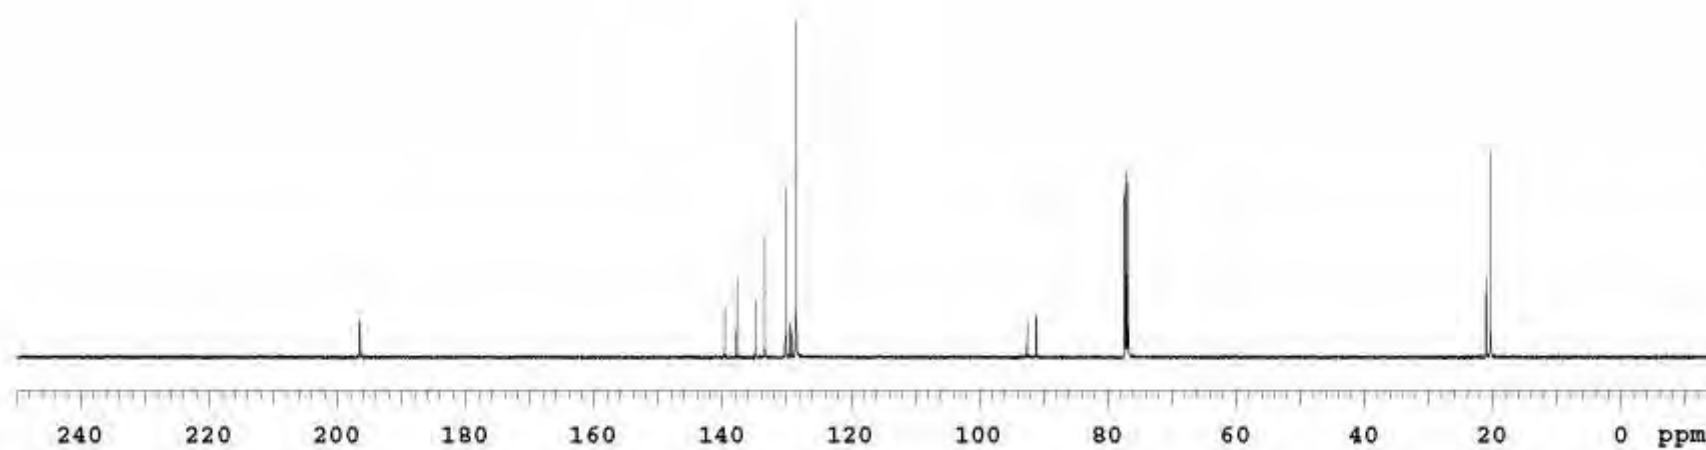

**$^1\text{H}$  NMR of (3-Chloro)phenyl-fluoroacetophenone (S2)**CDCl<sub>3</sub>, 23 °C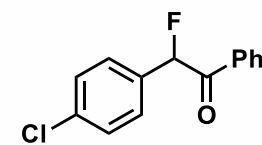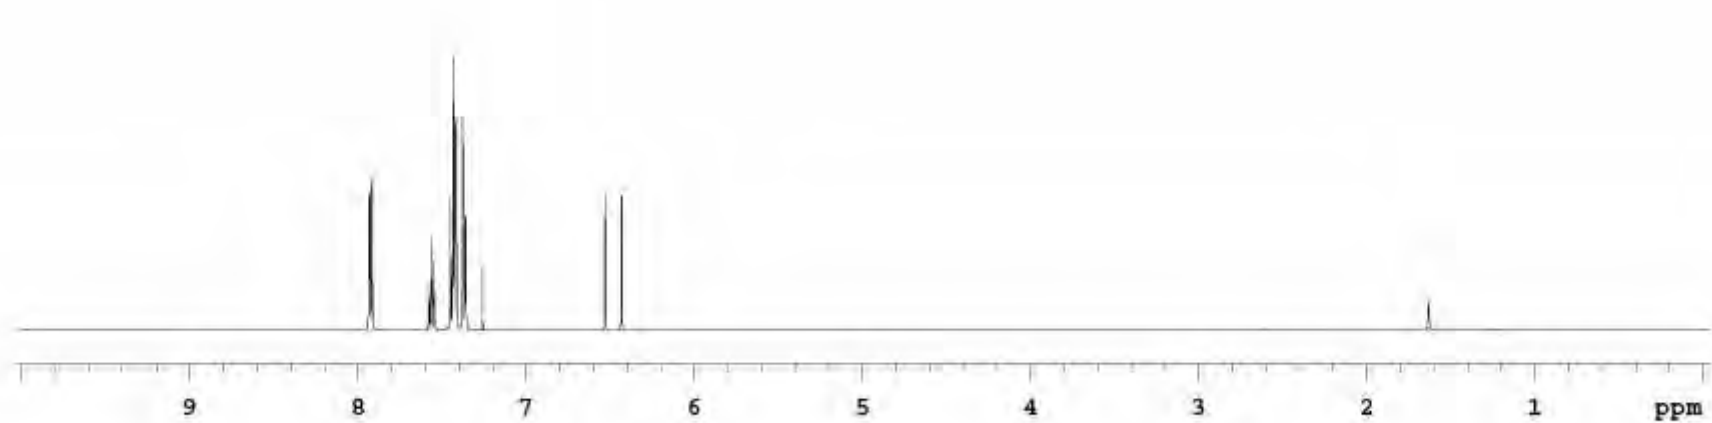

**$^{19}\text{F}$  NMR of (3-Chloro)phenyl-fluoroacetophenone (S2)**CDCl<sub>3</sub>, 23 °C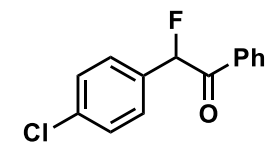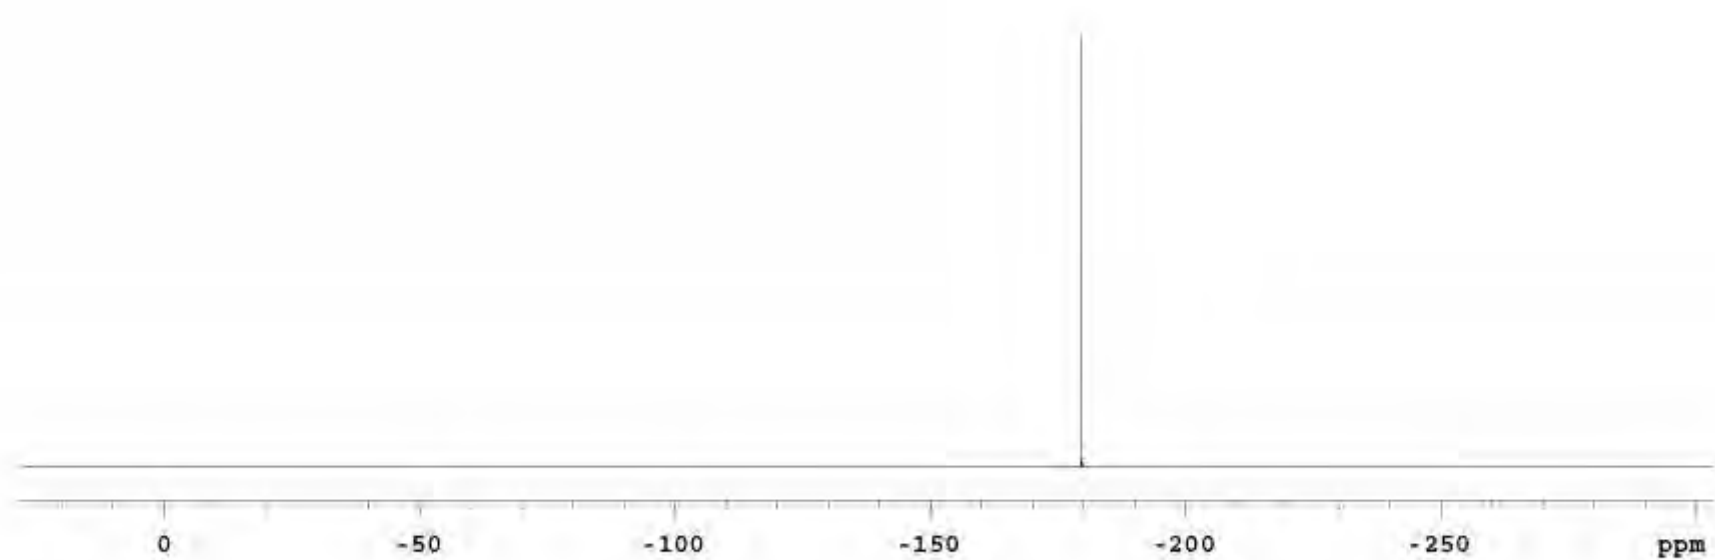

**$^{13}\text{C}$  NMR of (3-Chloro)phenyl-fluoroacetophenone (S2)**CDCl<sub>3</sub>, 25 °C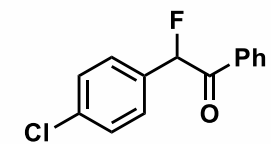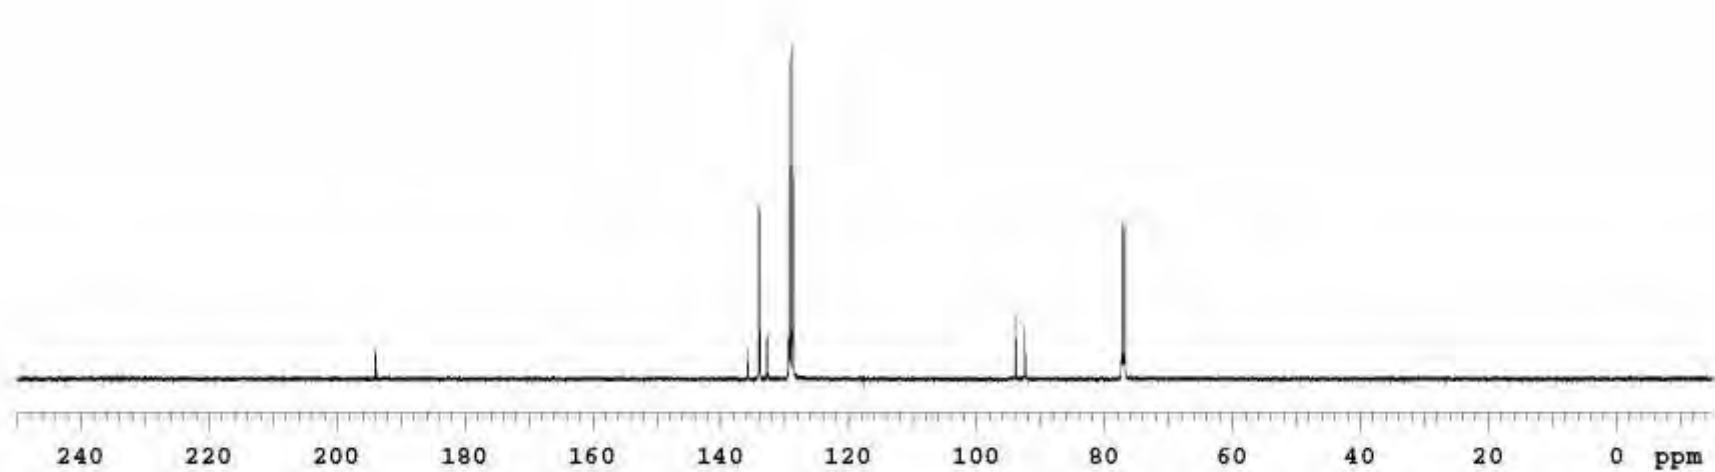

**$^1\text{H}$  NMR of (1-Fluoro-2-oxo-2-phenylethyl)-fenofibrate (S2)**CDCl<sub>3</sub>, 25 °C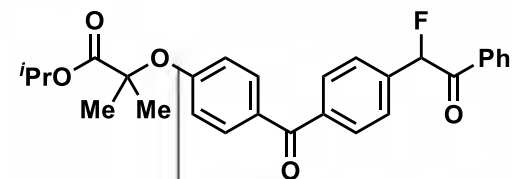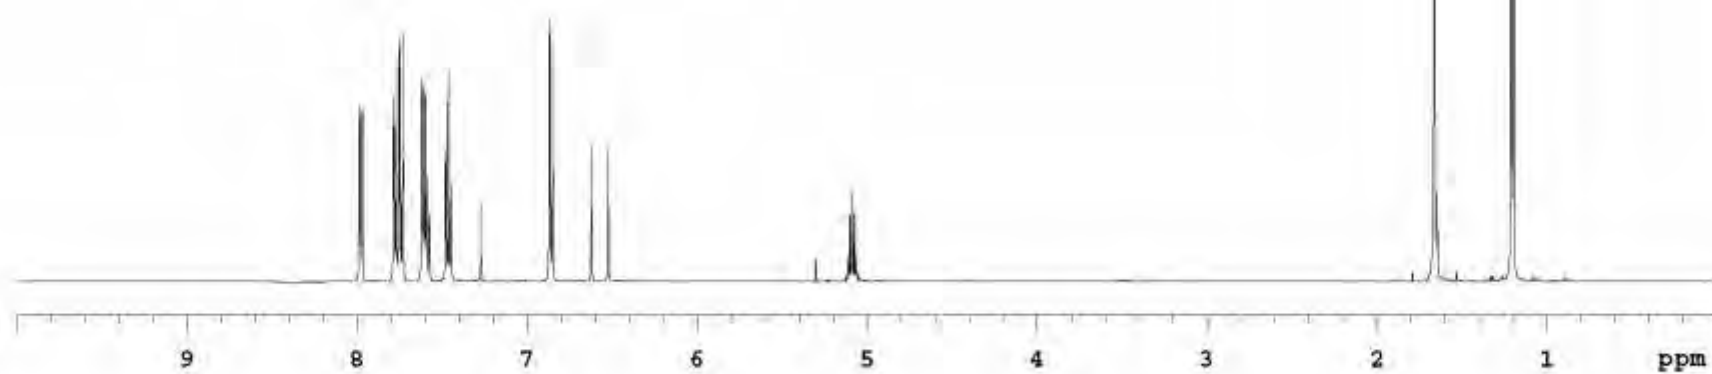

**$^{19}\text{F}$  NMR of (1-Fluoro-2-oxo-2-phenylethyl)-fenofibrate (S2)**CDCl<sub>3</sub>, 24 °C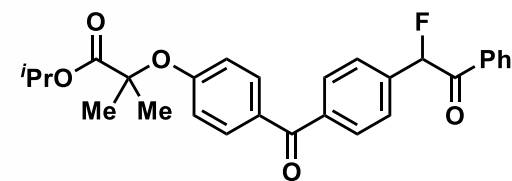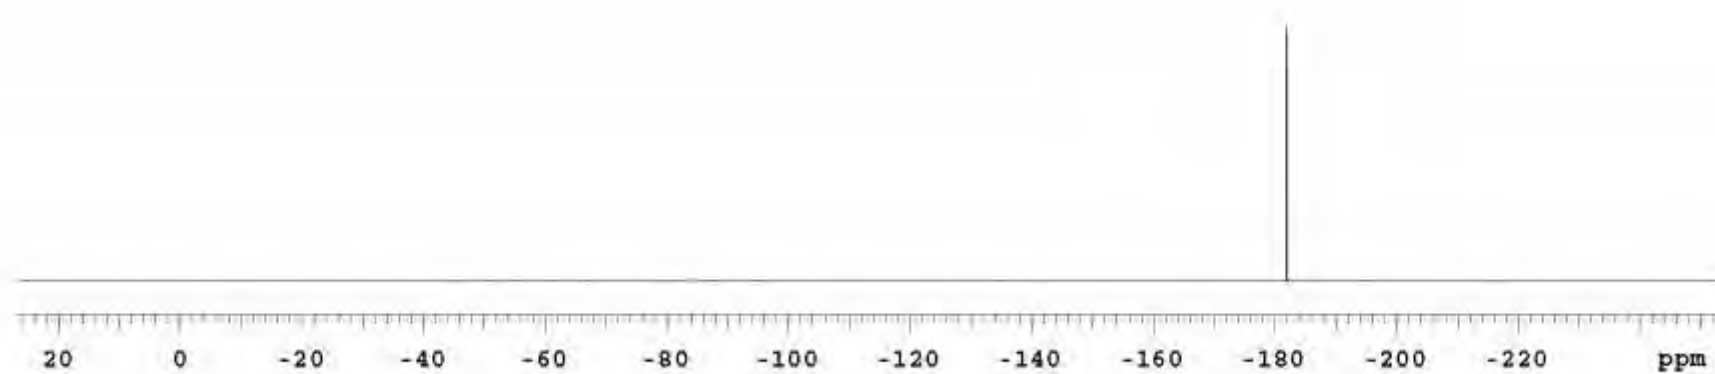

**$^{13}\text{C}$  NMR of (1-Fluoro-2-oxo-2-phenylethyl)-fenofibrate (S2)**CDCl<sub>3</sub>, 25 °C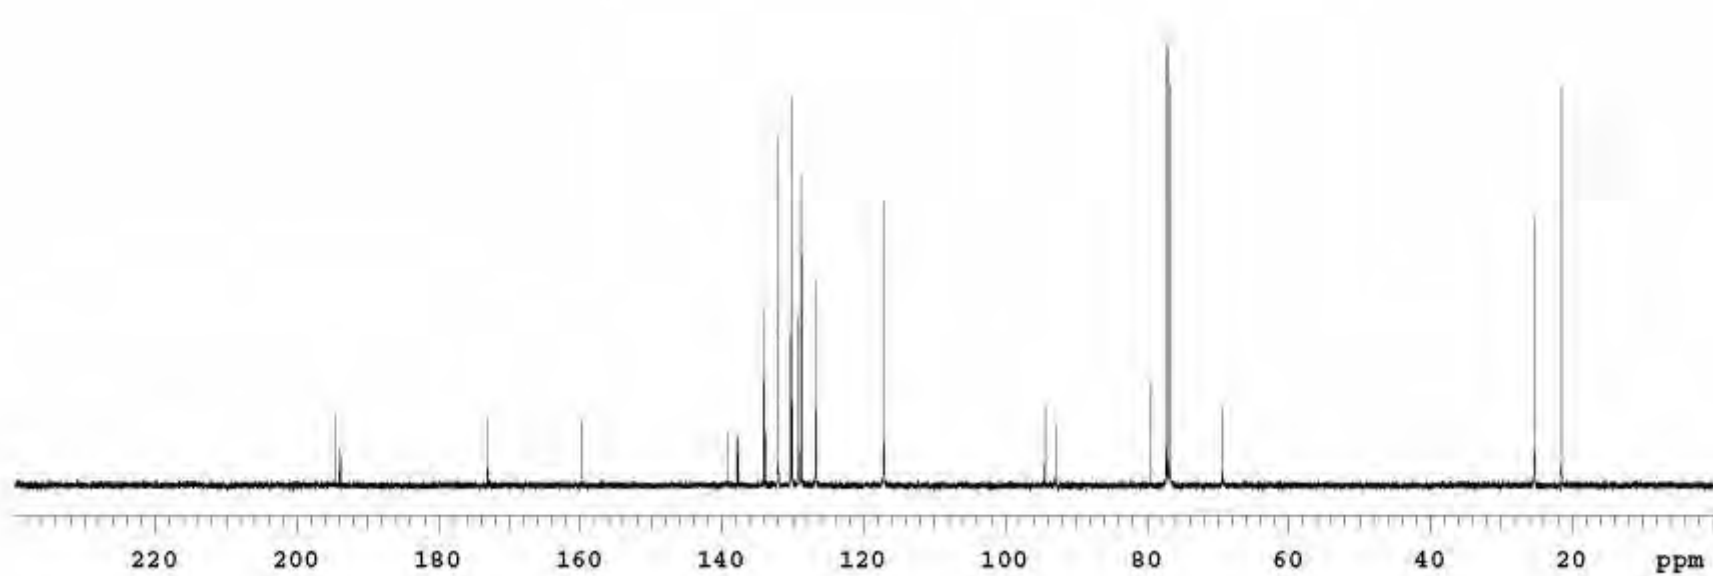



**$^1\text{H}$  NMR of (1-Fluoro-2-oxo-2-phenylethyl)-DAA1106 (S3)**CDCl<sub>3</sub>, 55 °C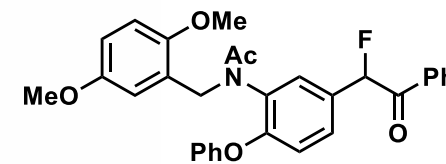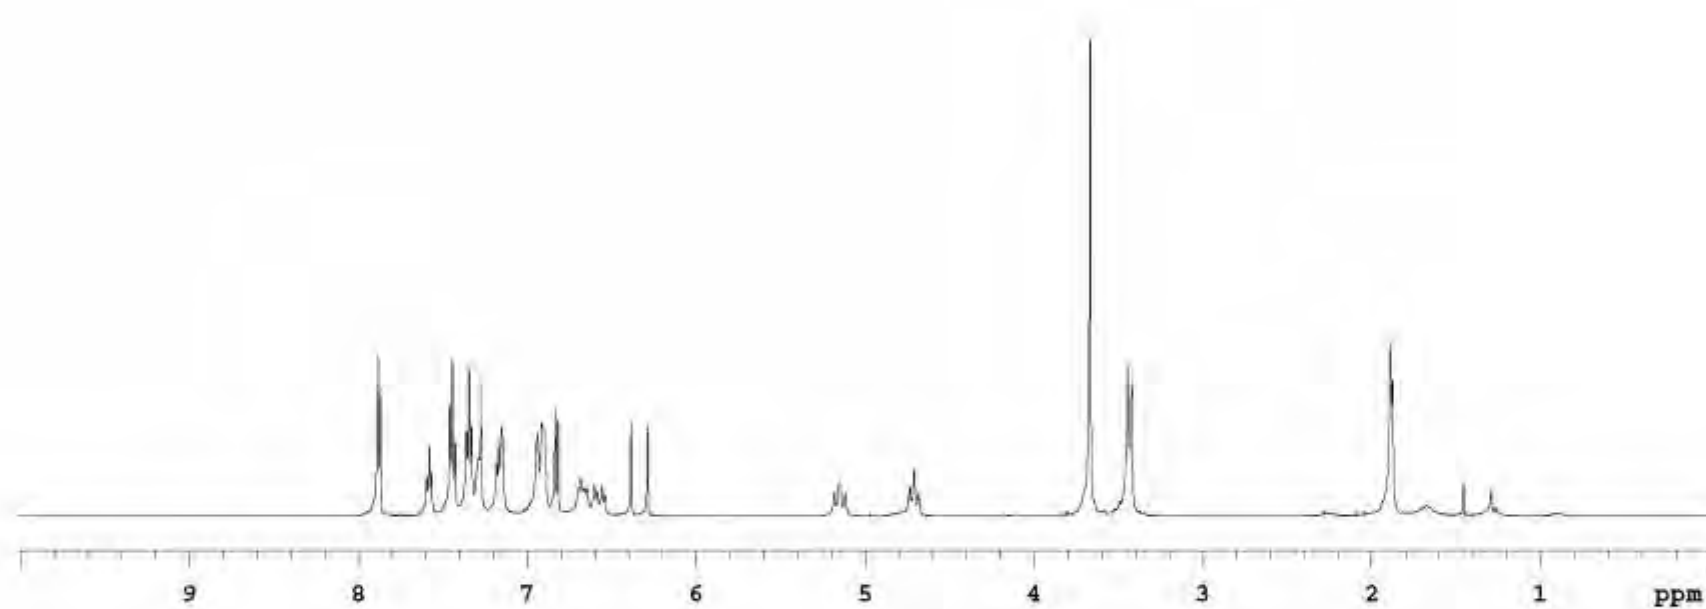

**<sup>19</sup>F NMR of (1-Fluoro-2-oxo-2-phenylethyl)-DAA1106 (S3)**CDCl<sub>3</sub>, 25 °C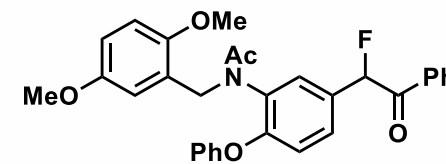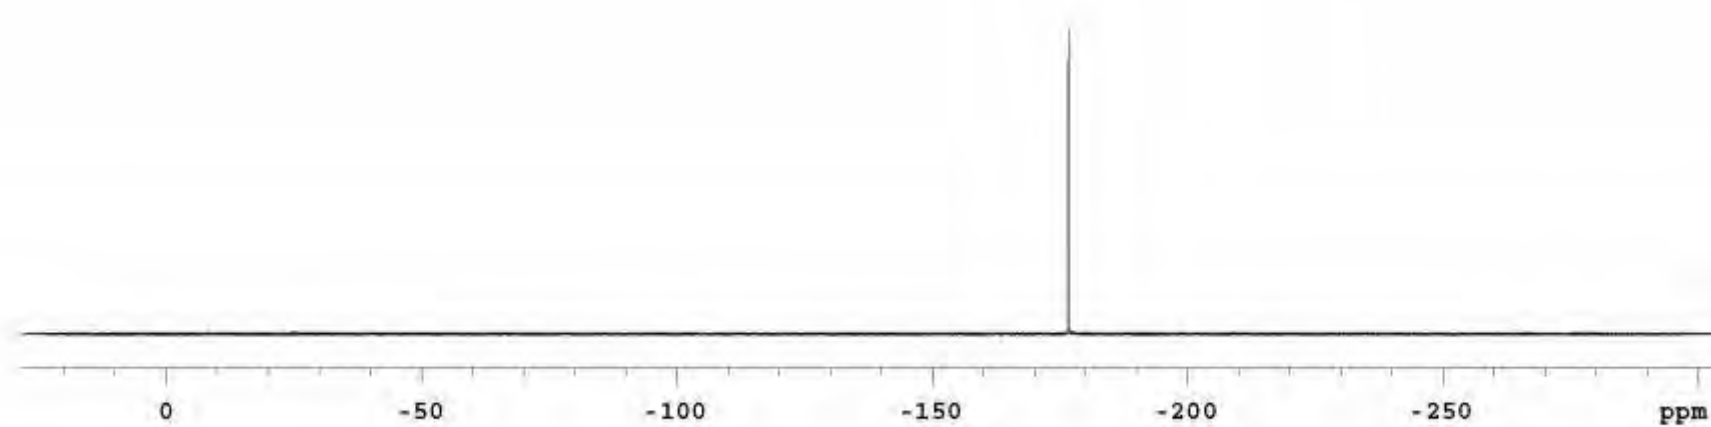

**$^{13}\text{C}$  NMR of (1-Fluoro-2-oxo-2-phenylethyl)-DAA1106 (S3)**CDCl<sub>3</sub>, 25 °C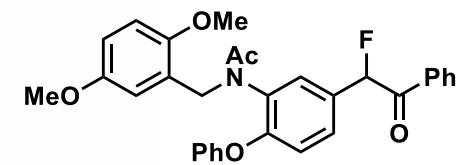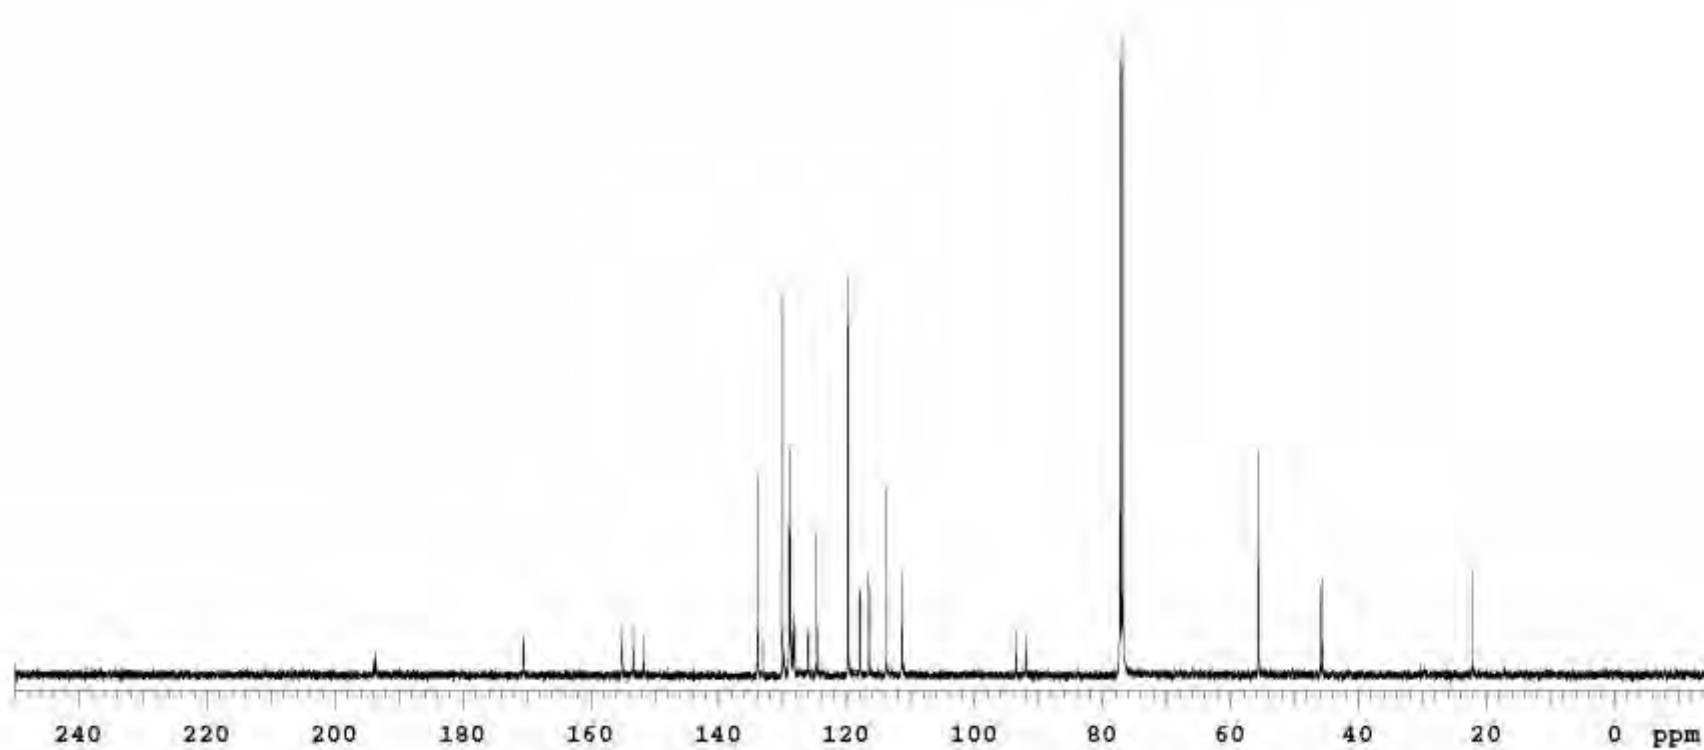

**$^1\text{H}$  NMR of (1-Fluoro-2-oxo-2-phenylethyl)-estrone (S4)**CDCl<sub>3</sub>, 25 °C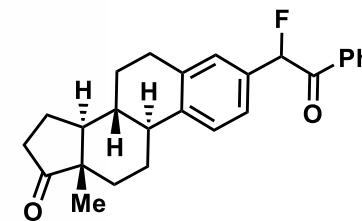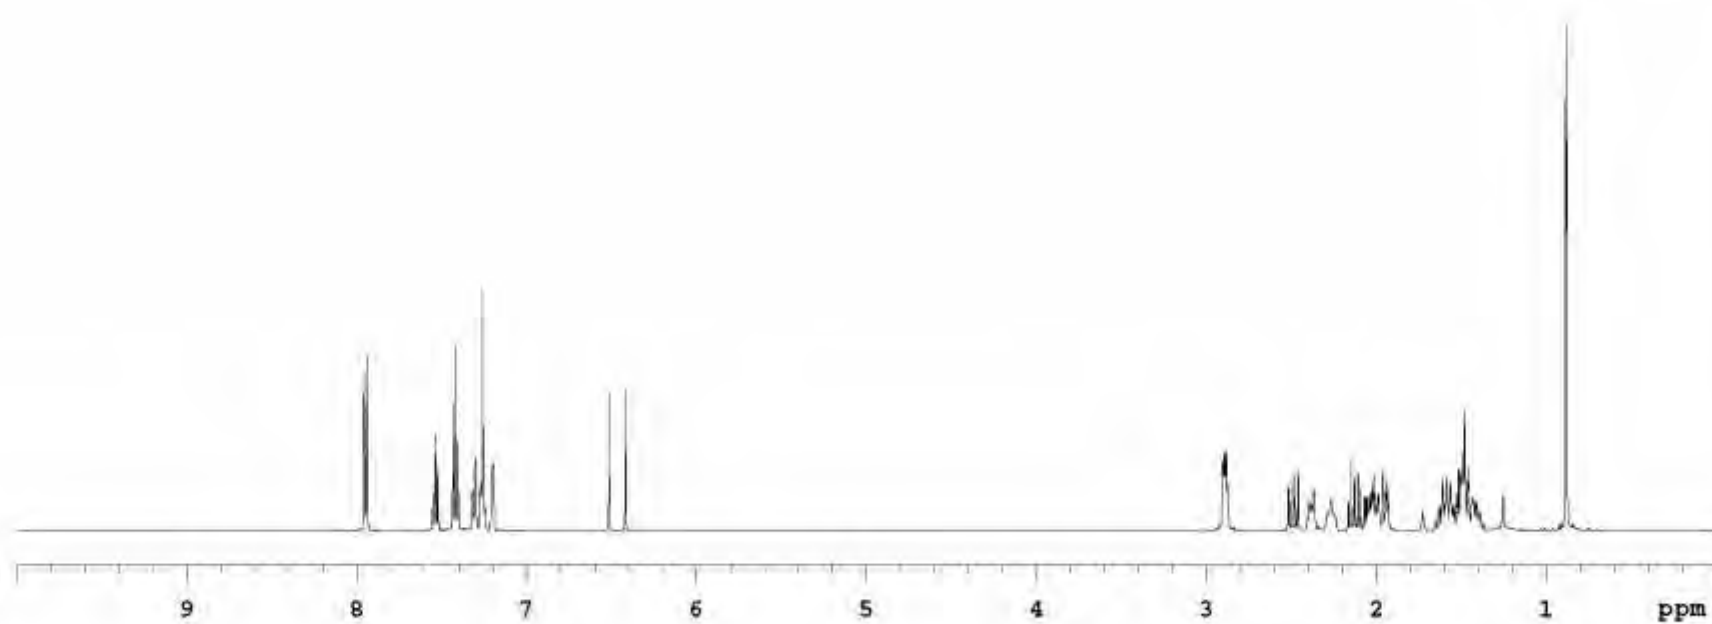

**$^{19}\text{F}$  NMR of (1-Fluoro-2-oxo-2-phenylethyl)-estrone (S4)**CDCl<sub>3</sub>, 25 °C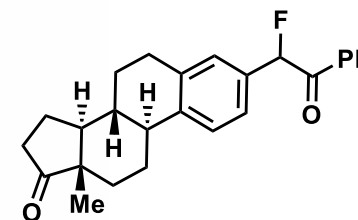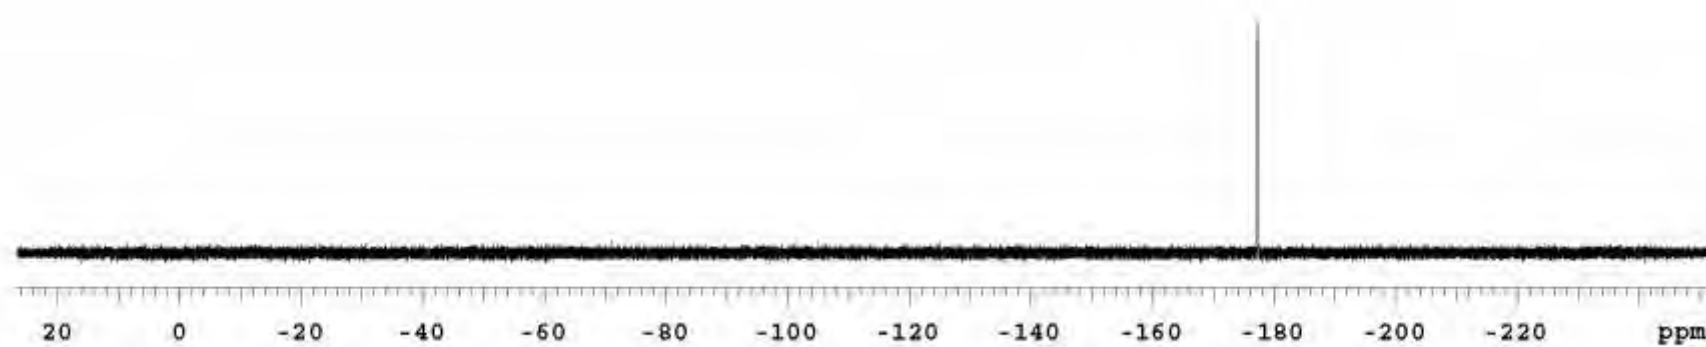

**$^{13}\text{C}$  NMR of (1-Fluoro-2-oxo-2-phenylethyl)-estrone (S4)**CDCl<sub>3</sub>, 25 °C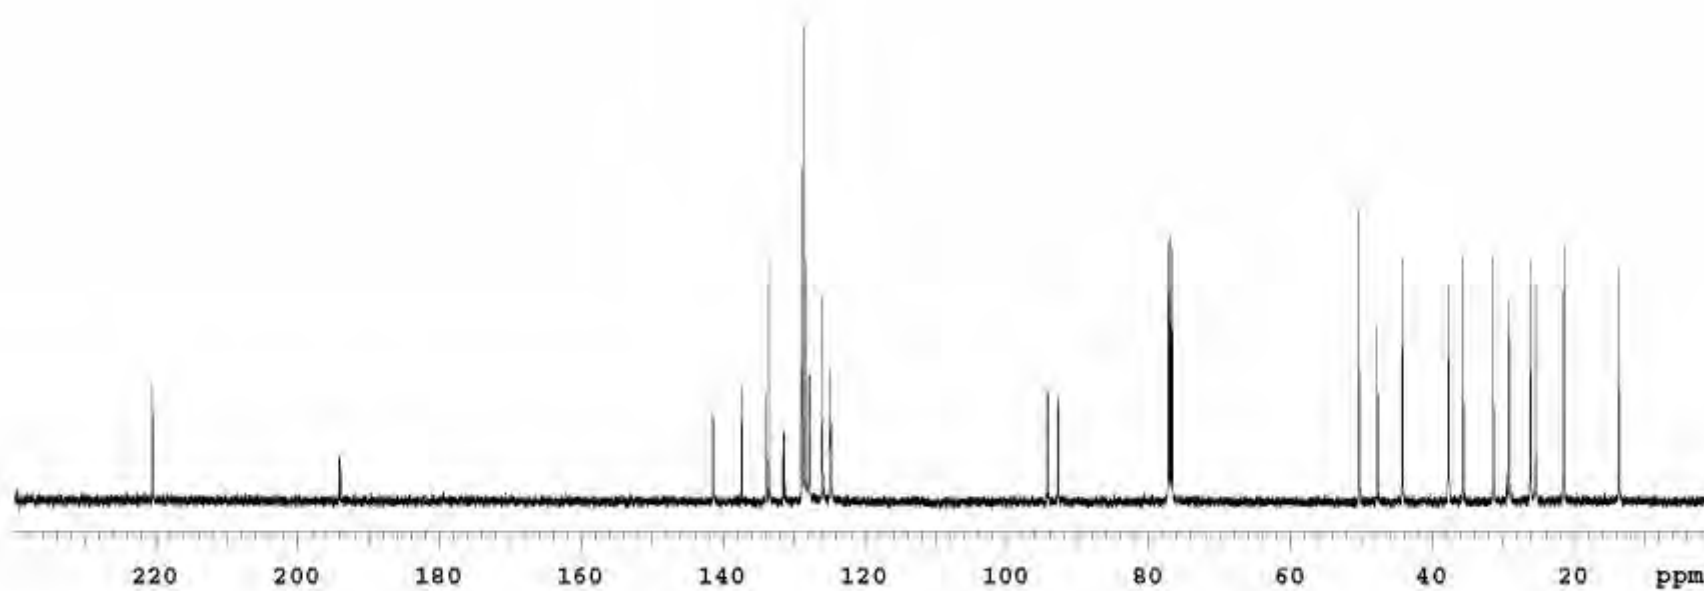

**$^1\text{H}$  NMR of (1-Fluoro-2-oxo-2-phenylethyl)-claritin (S5)**CDCl<sub>3</sub>, 24 °C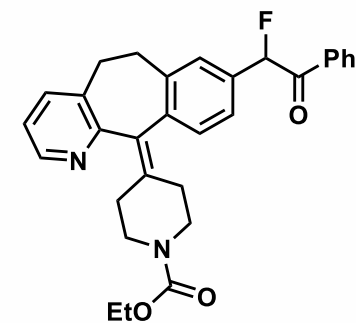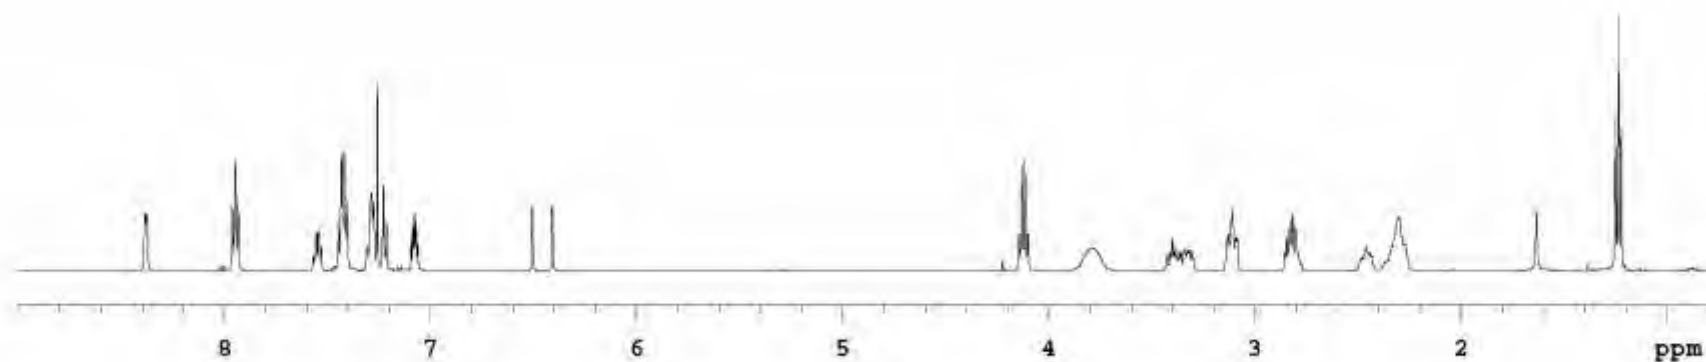

**$^{19}\text{F}$  NMR of (1-Fluoro-2-oxo-2-phenylethyl)-claritin (S5)**CDCl<sub>3</sub>, 24 °C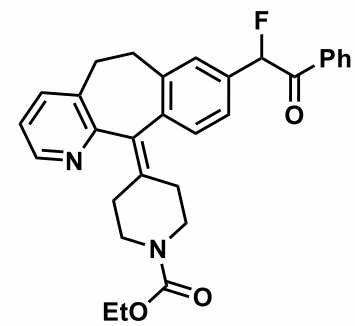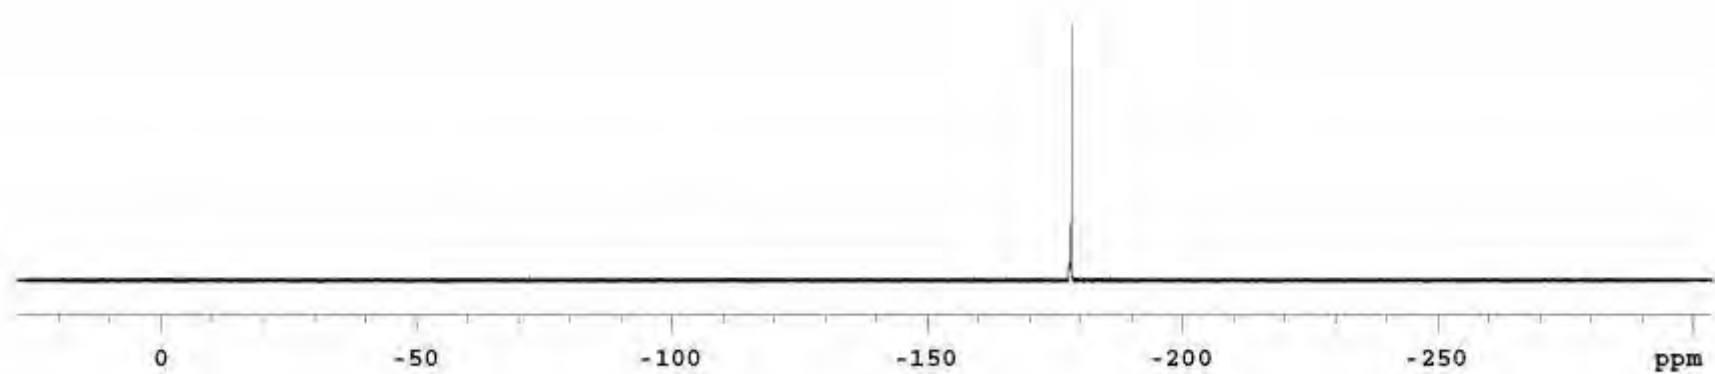



**$^{13}\text{C}$  NMR of (1-Fluoro-2-oxo-2-phenylethyl)-claritin (S5)**CDCl<sub>3</sub>, 25 °C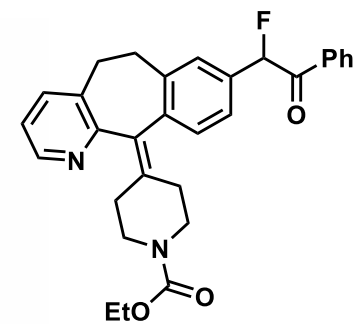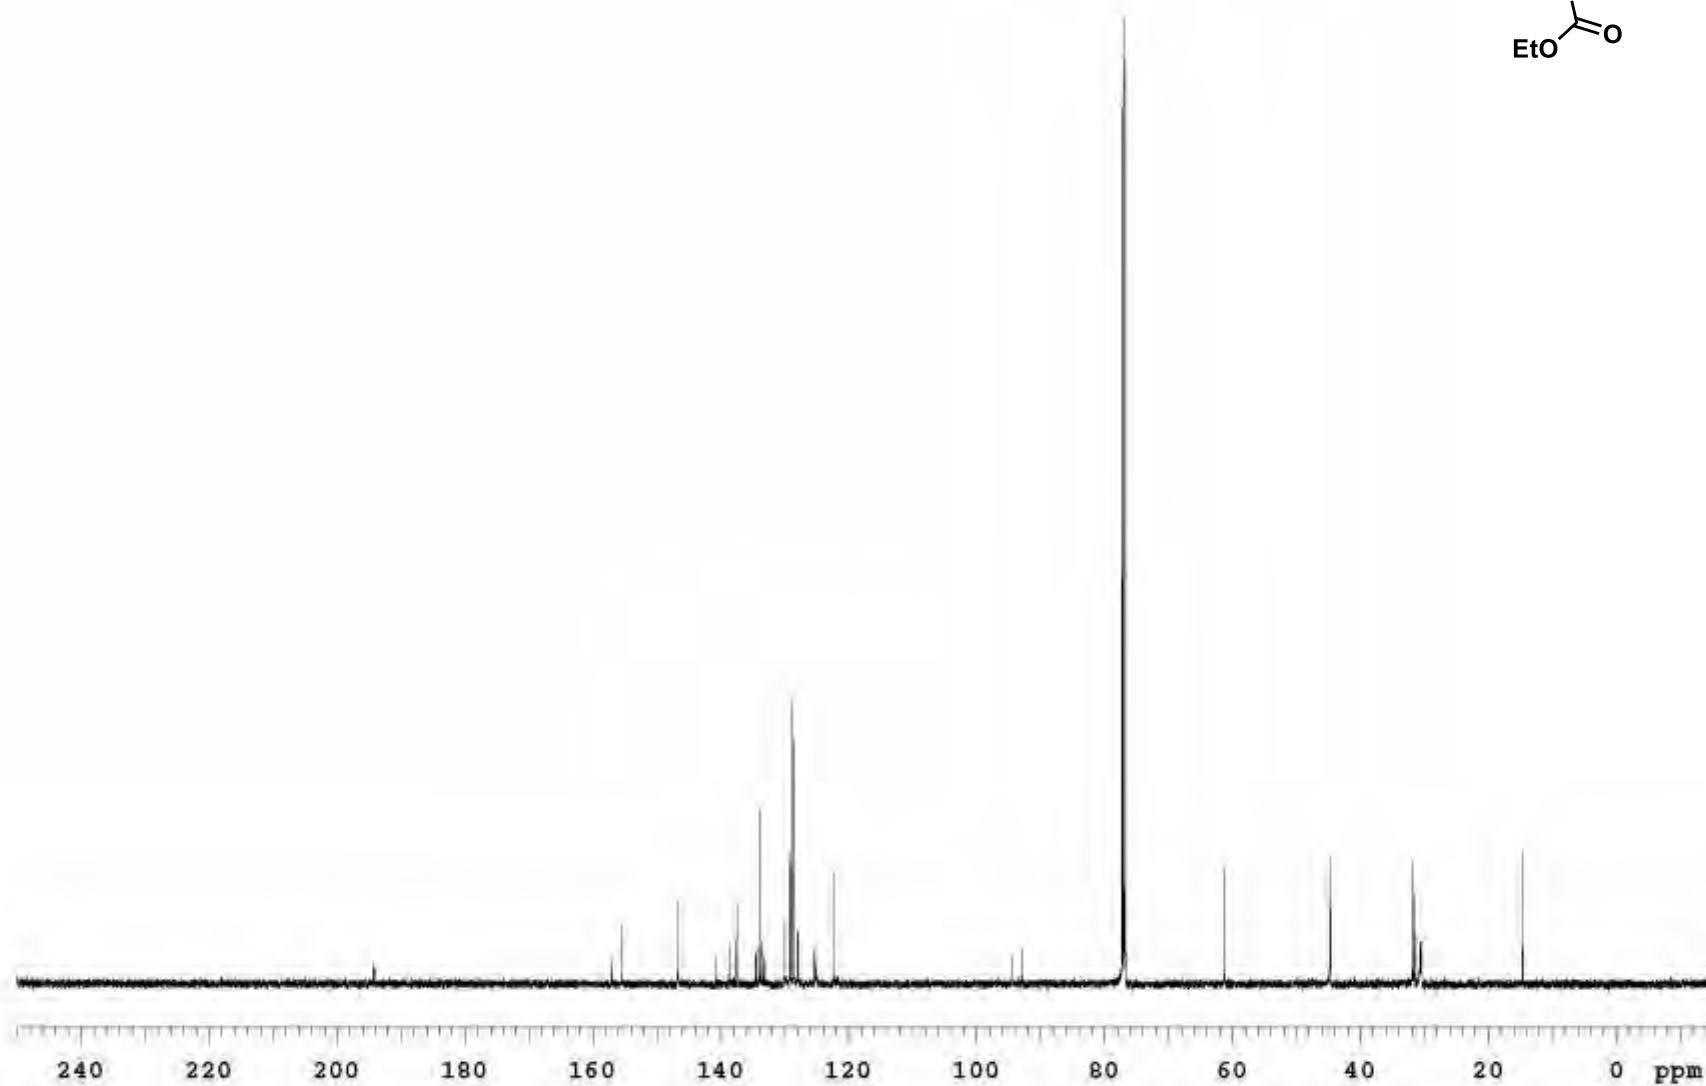

**<sup>1</sup>H NMR of 4-Bromo-*N,N*-diethyl-3-methoxybenzamide (S12)**CDCl<sub>3</sub>, -15°C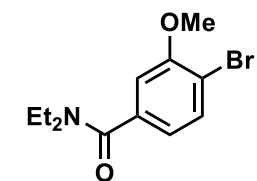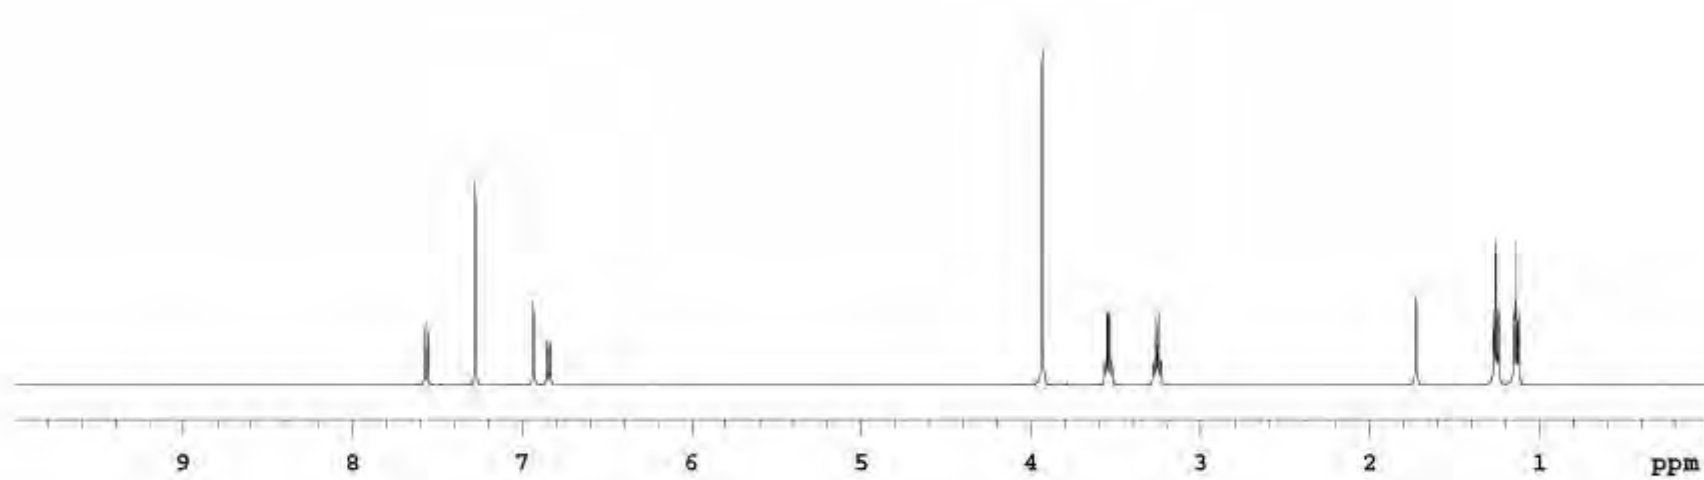

**$^{13}\text{C}$  NMR of 4-Bromo-*N,N*-diethyl-3-methoxybenzamide (S12)**CDCl<sub>3</sub>, -15 °C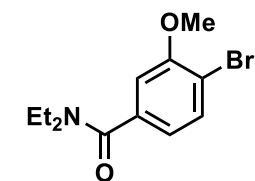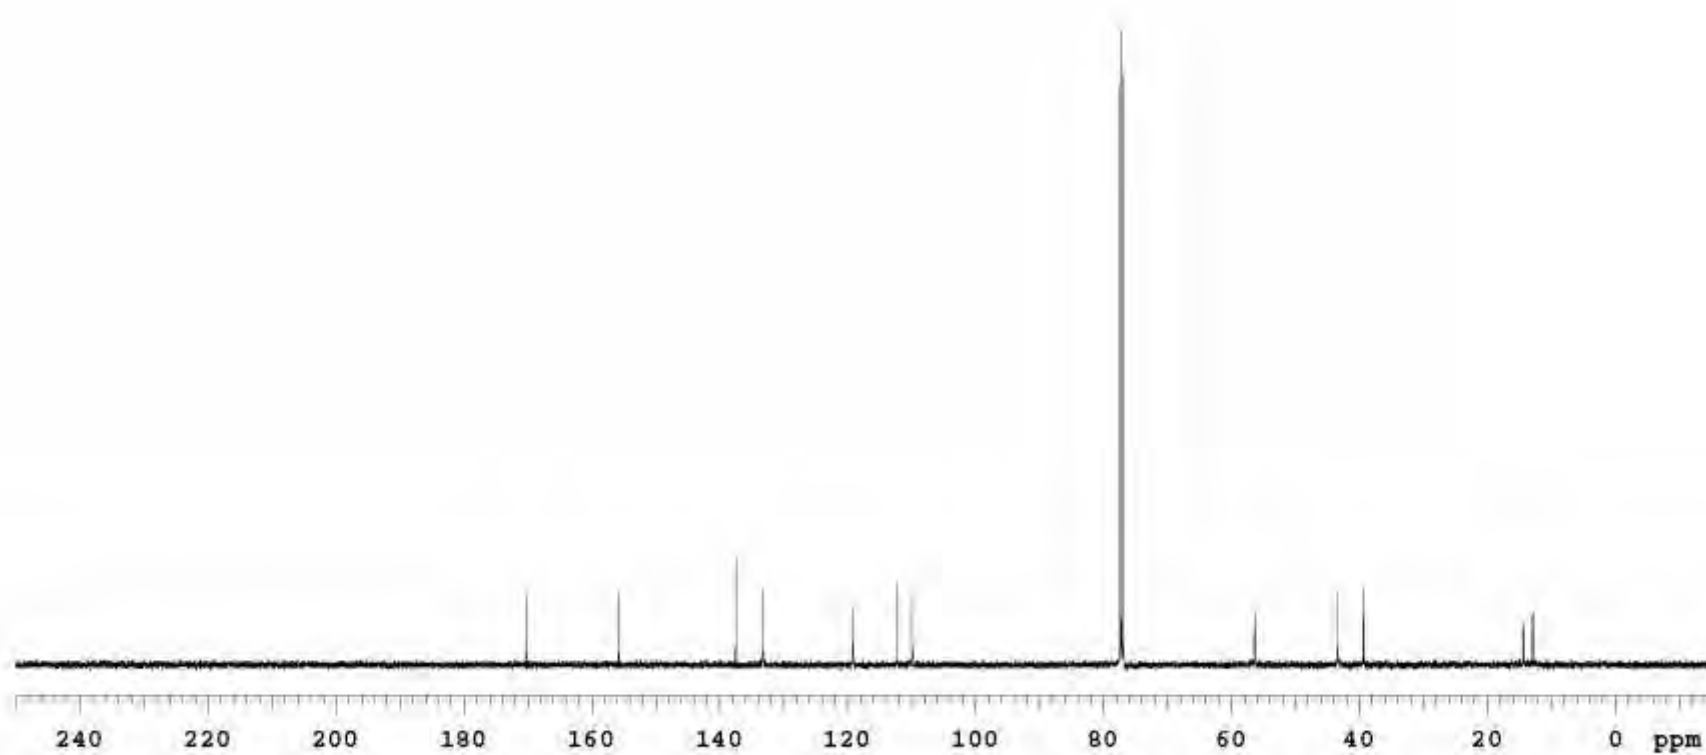

**$^1\text{H}$  NMR of (1-Fluoro-2-oxo-2-phenylethyl)-analepticon (S6)**CDCl<sub>3</sub>, -15 °C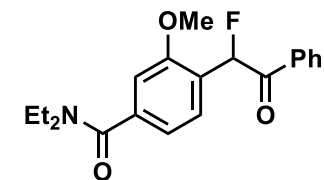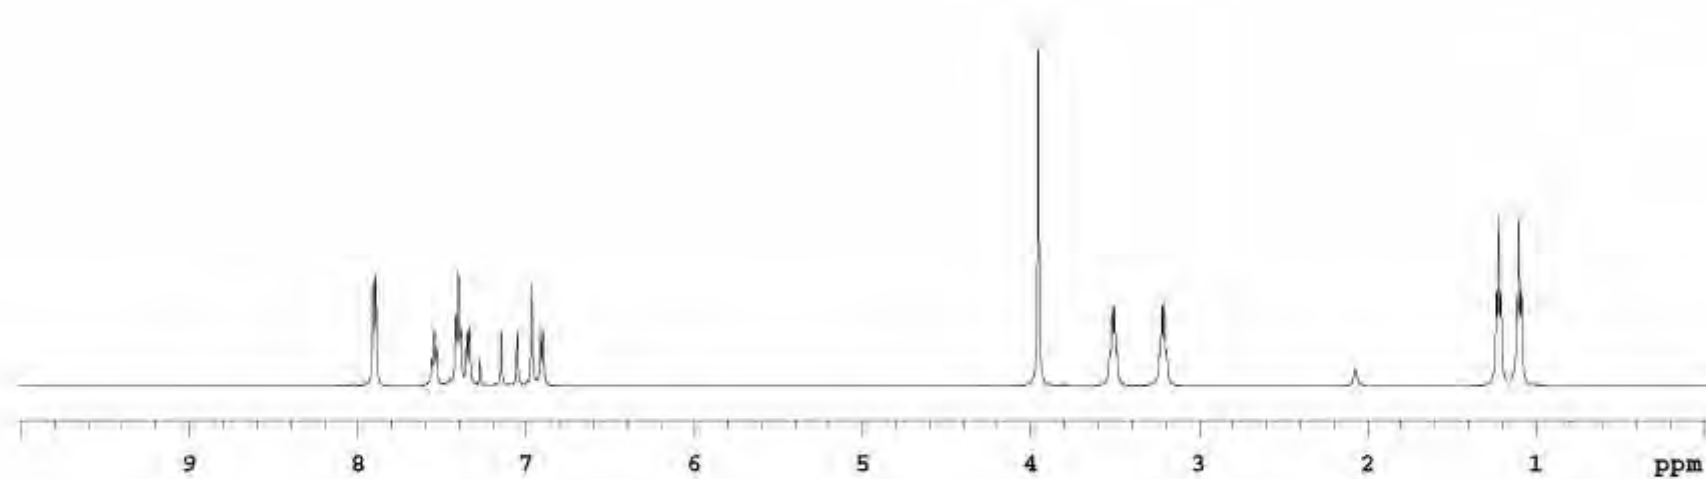

**$^{19}\text{F}$  NMR of (1-Fluoro-2-oxo-2-phenylethyl)-analepticon (S6)**CDCl<sub>3</sub>, 25 °C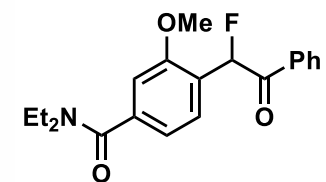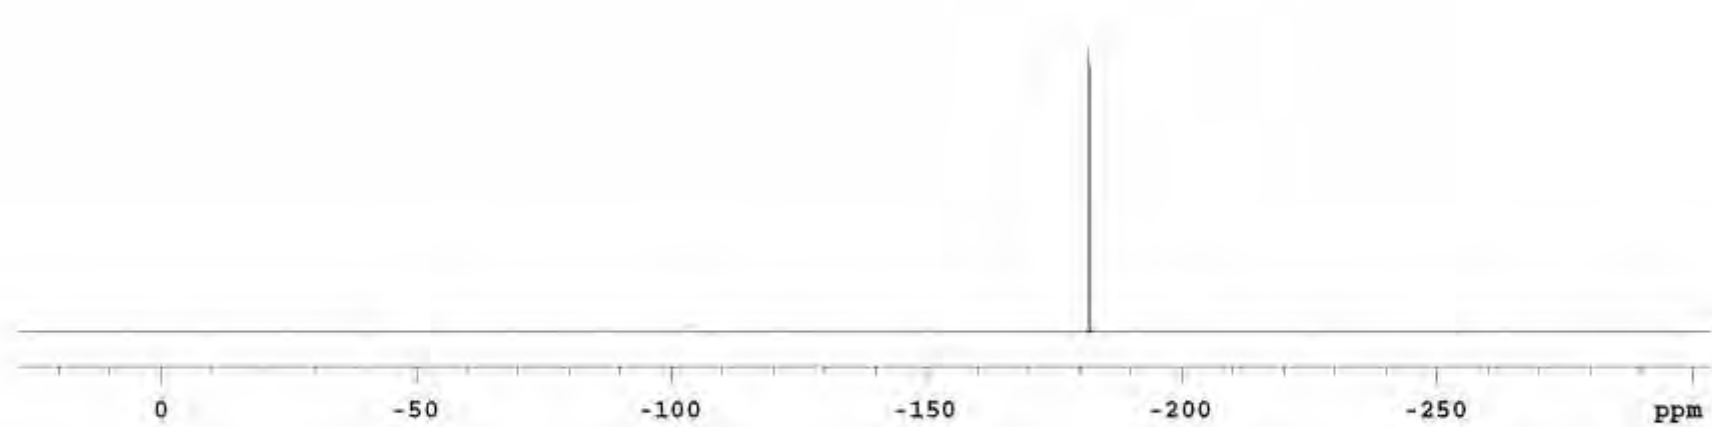

**$^{13}\text{C}$  NMR of (1-Fluoro-2-oxo-2-phenylethyl)-analepticon (S6)**CDCl<sub>3</sub>, -15 °C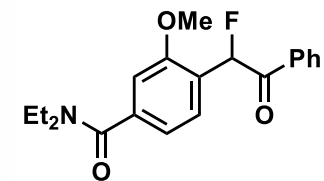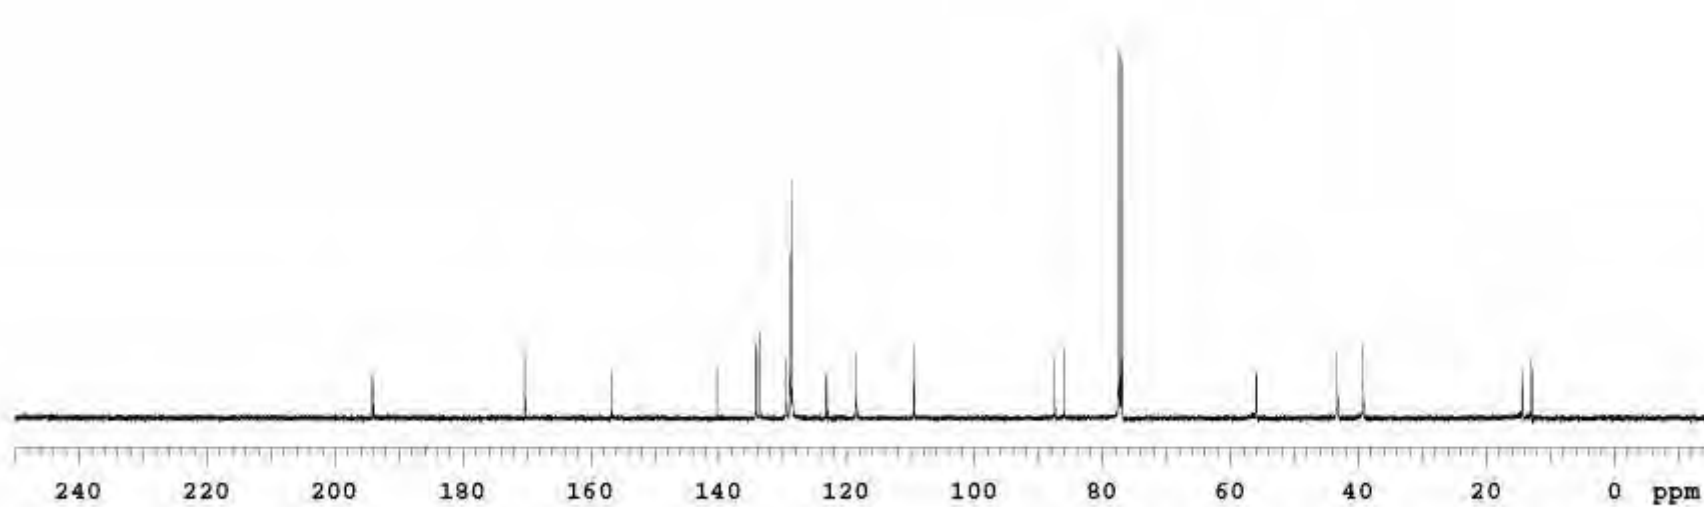

**$^1\text{H}$  NMR of (1-Fluoro-2-oxo-2-phenylethyl)-*N*-Boc-fluoxetine (S7)**CDCl<sub>3</sub>, 55 °C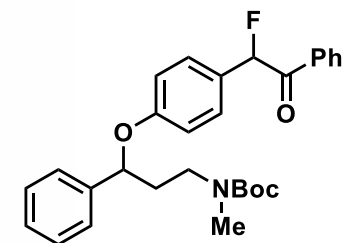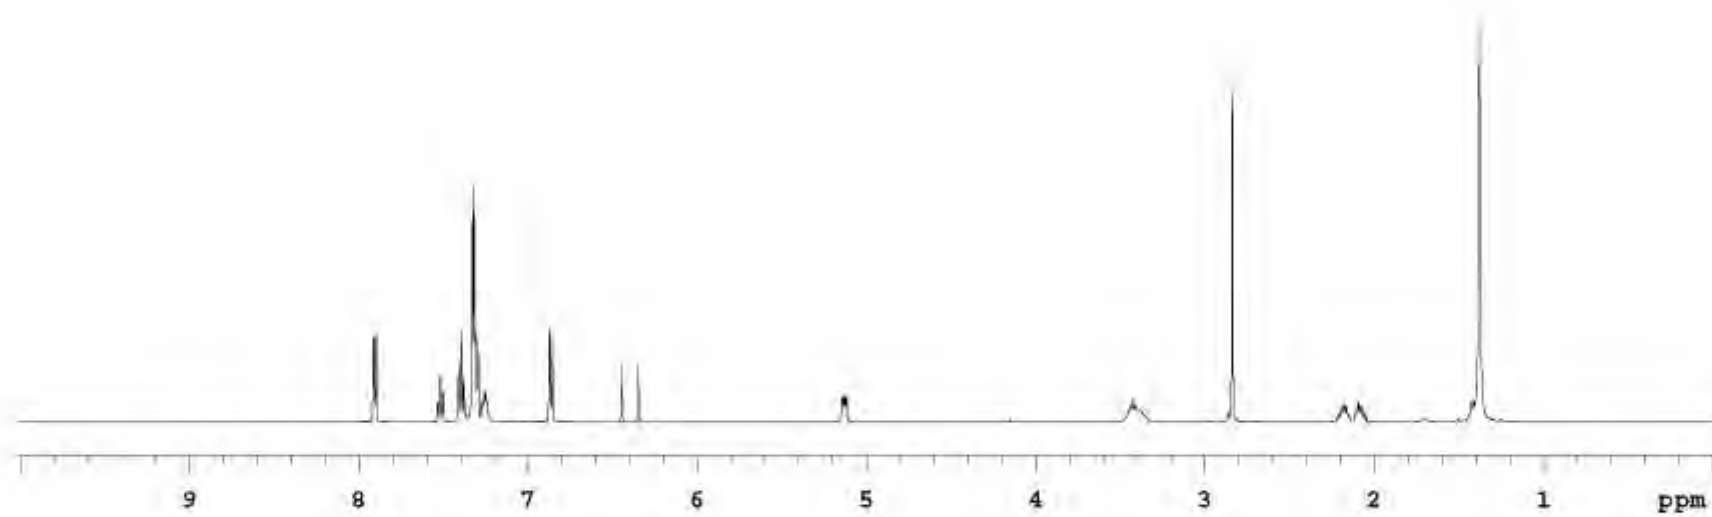

**$^{19}\text{F}$  NMR of (1-Fluoro-2-oxo-2-phenylethyl)-*N*-Boc-fluoxetine (S7)**CDCl<sub>3</sub>, 25 °C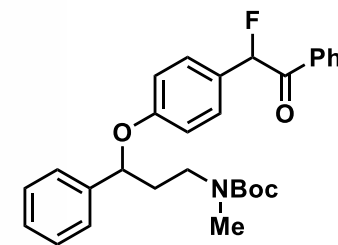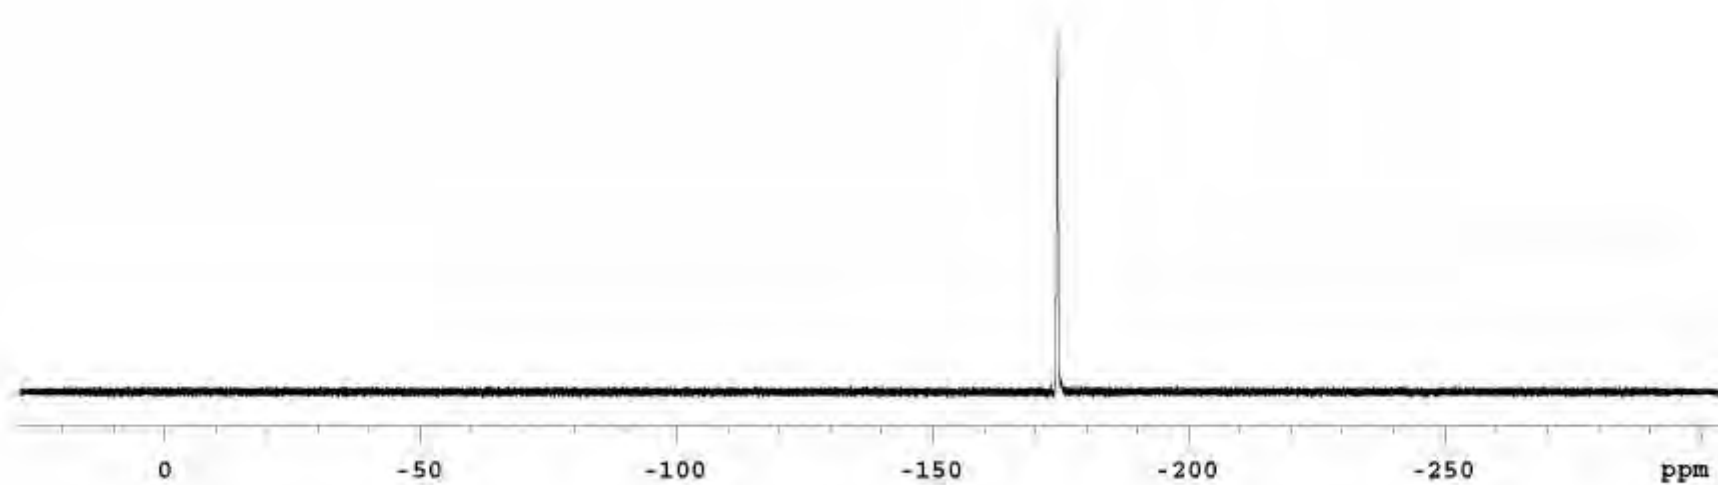



**$^{13}\text{C}$  NMR of (1-Fluoro-2-oxo-2-phenylethyl)-*N*-Boc-fluoxetine (S7)**CDCl<sub>3</sub>, 55 °C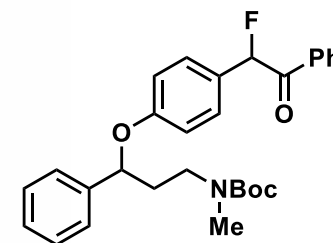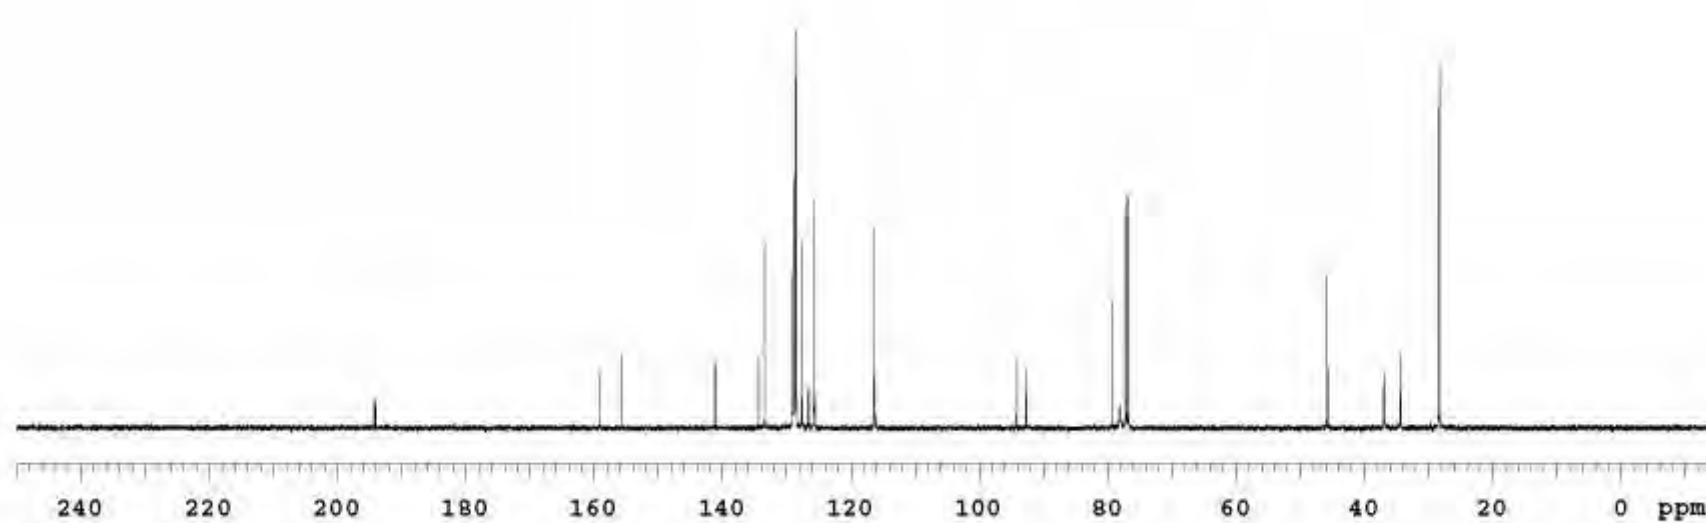

**$^1\text{H}$  NMR of (1-Fluoro-2-oxo-2-phenylethyl)-SC-58125 (S8)**CDCl<sub>3</sub>, 23 °C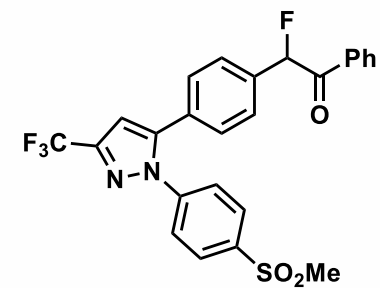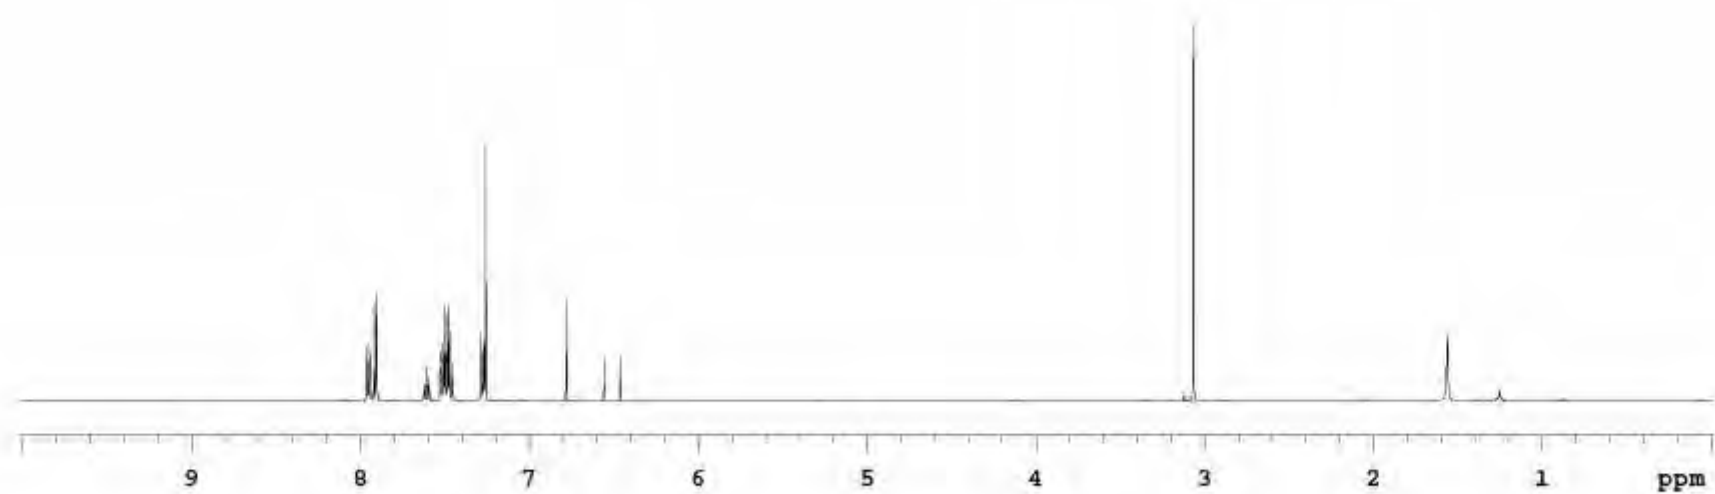

**$^{19}\text{F}$  NMR of (1-Fluoro-2-oxo-2-phenylethyl)-SC-58125 (S8)**CDCl<sub>3</sub>, 23 °C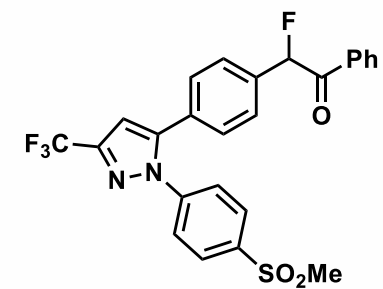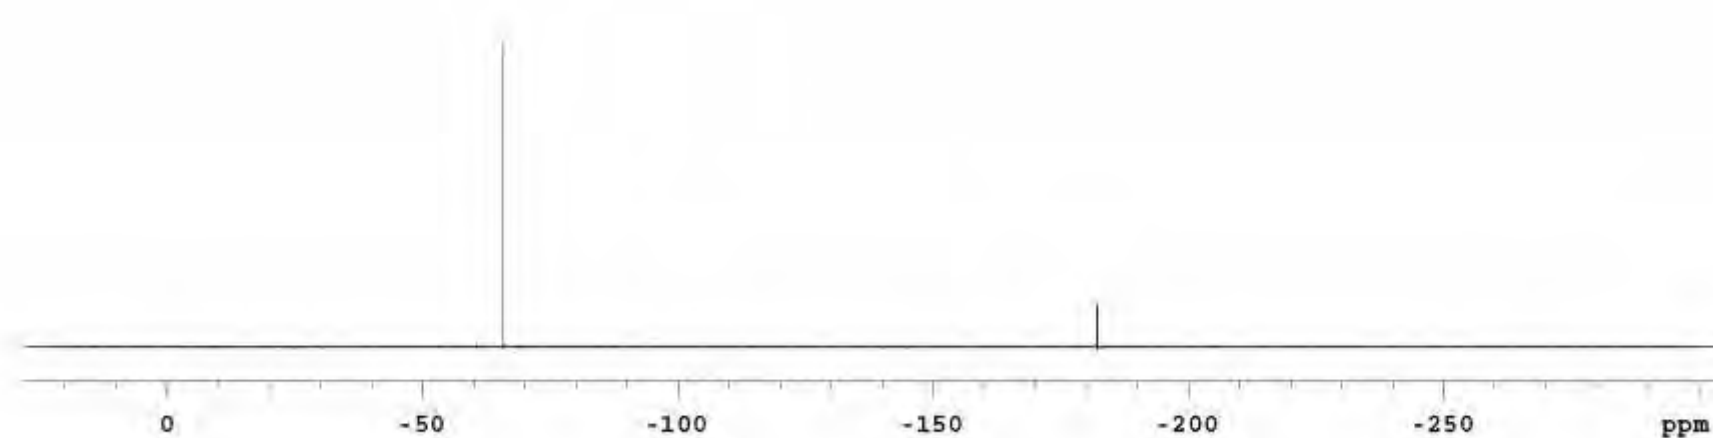

**$^{13}\text{C}$  NMR of (1-Fluoro-2-oxo-2-phenylethyl)-SC-58125 (S8)**CDCl<sub>3</sub>, 23 °C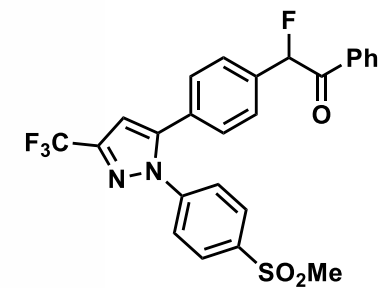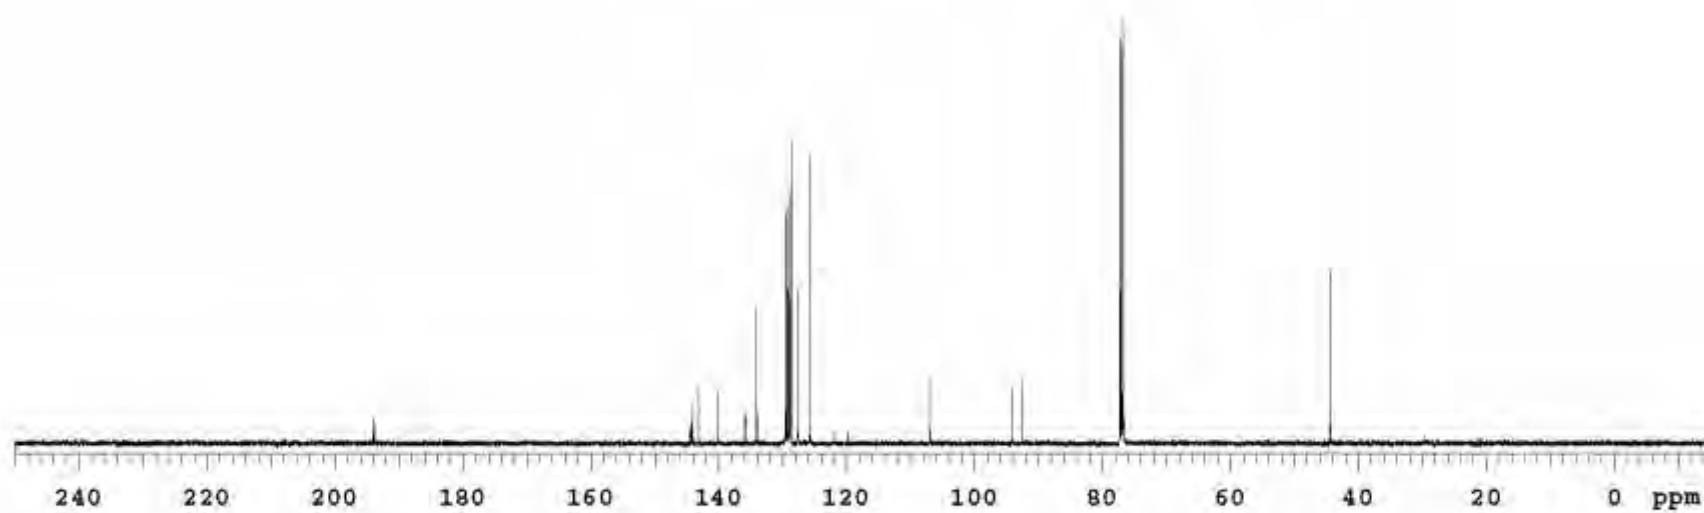

**$^1\text{H}$  NMR of Hydroquinidine 4-(1-Fluoro-2-oxo-2-phenylethyl)-benzoate (S9)**CDCl<sub>3</sub>, 55 °C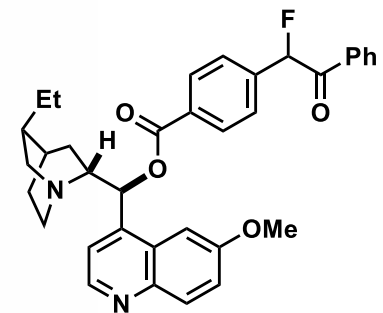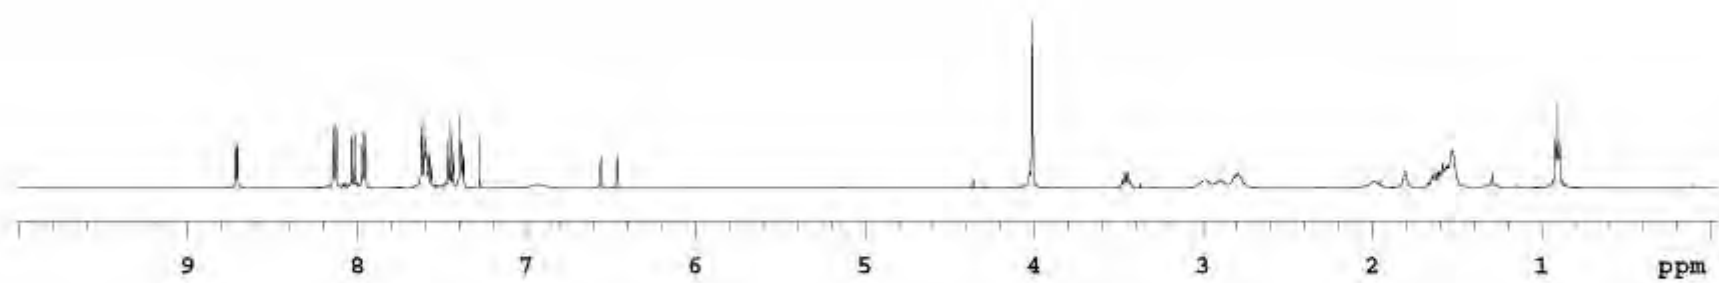

**$^{19}\text{F}$  NMR of Hydroquinidine 4-(1-Fluoro-2-oxo-2-phenylethyl)-benzoate (S9)**CDCl<sub>3</sub>, 23 °C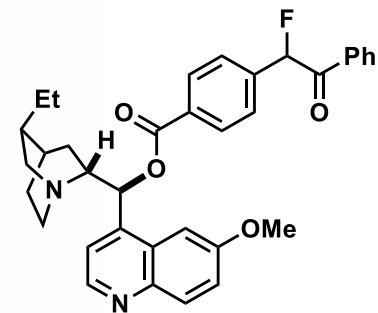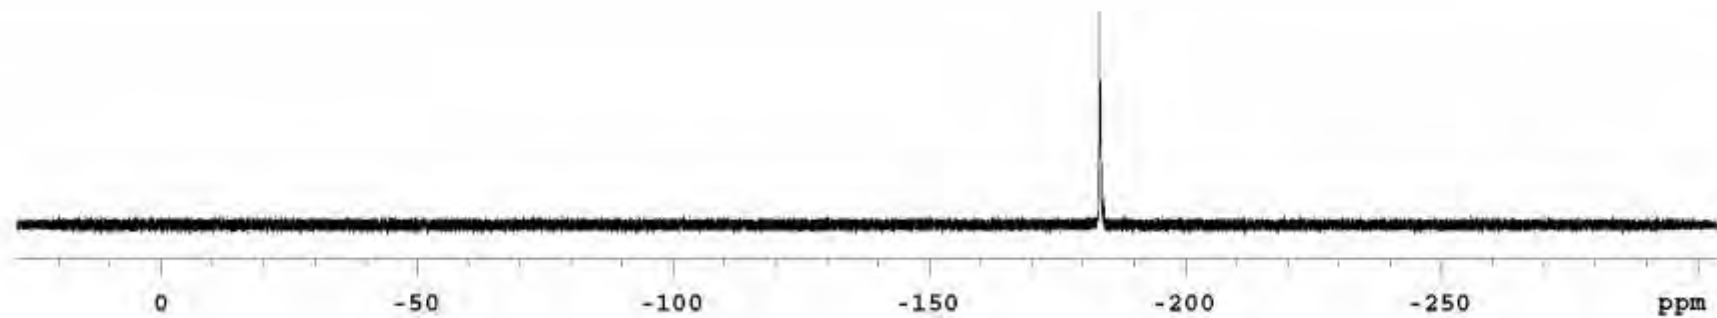

**$^{13}\text{C}$  NMR of Hydroquinidine 4-(1-Fluoro-2-oxo-2-phenylethyl)-benzoate (S9)**CDCl<sub>3</sub>, 25 °C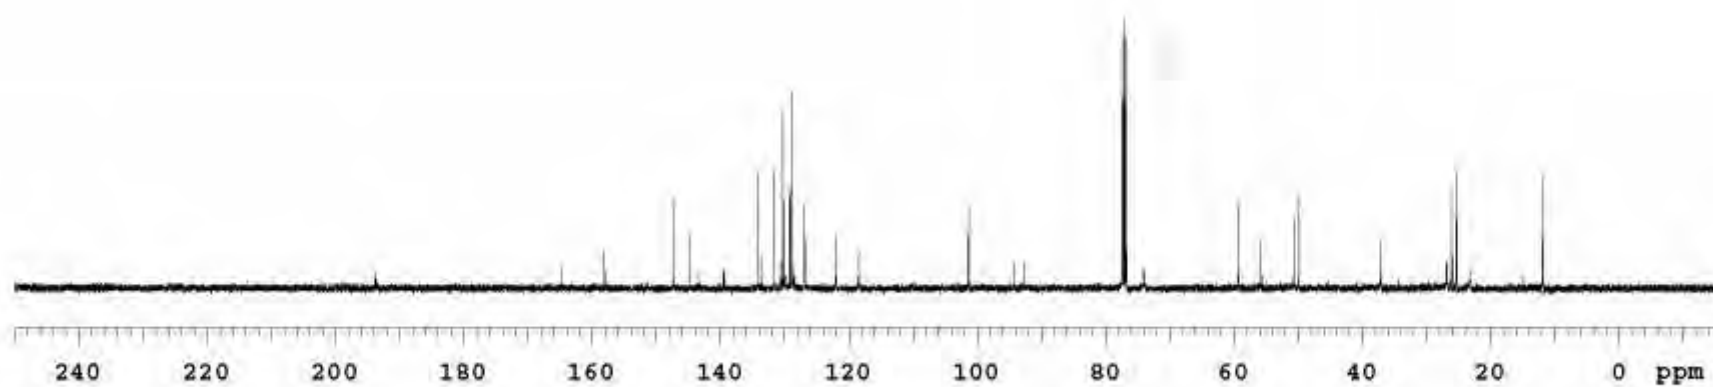

**$^1\text{H}$  NMR of Phenyl-bromo-fluoroacetophenone (2r')**CDCl<sub>3</sub>, 25 °C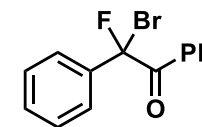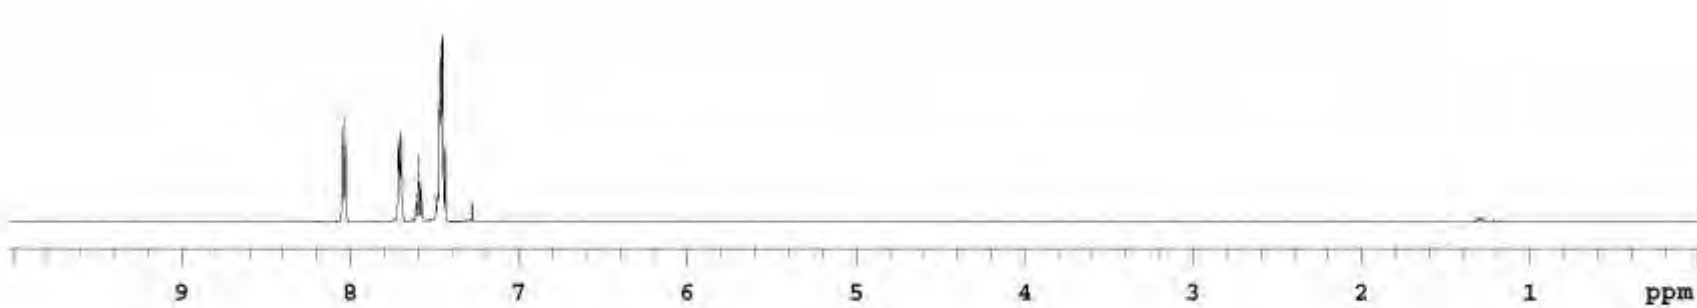



**$^{19}\text{F}$  NMR of Phenyl-bromo-fluoroacetophenone (2r')**CDCl<sub>3</sub>, 23 °C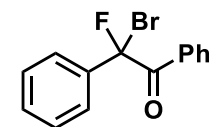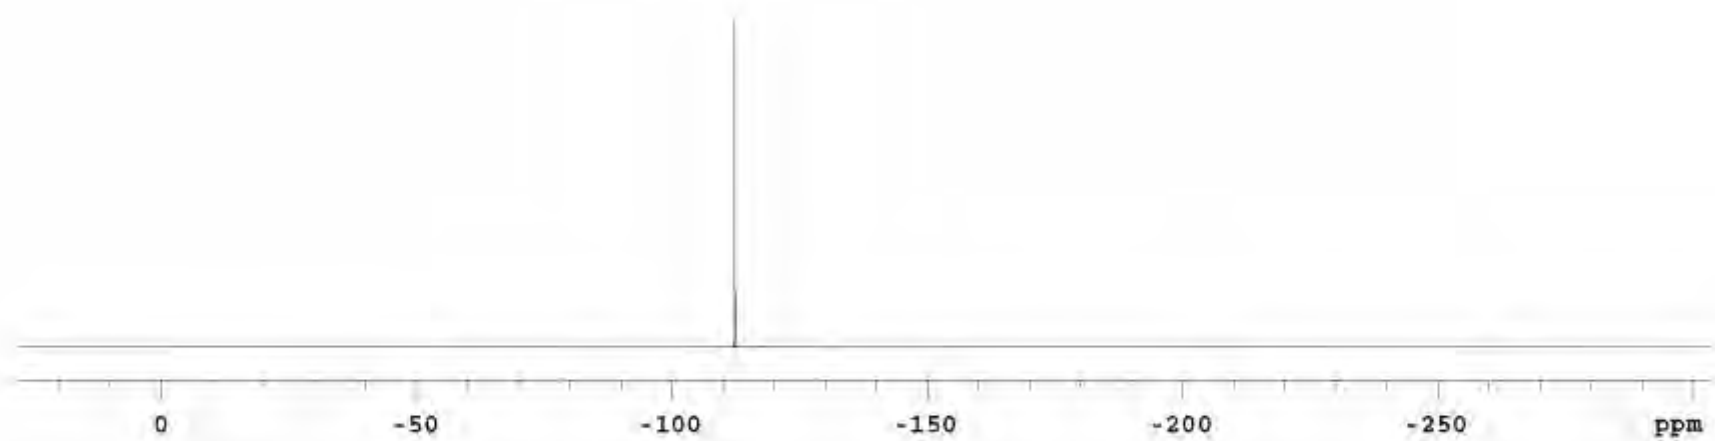

**$^{13}\text{C}$  NMR of Phenyl-bromo-fluoroacetophenone (2r')**CDCl<sub>3</sub>, 25 °C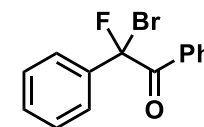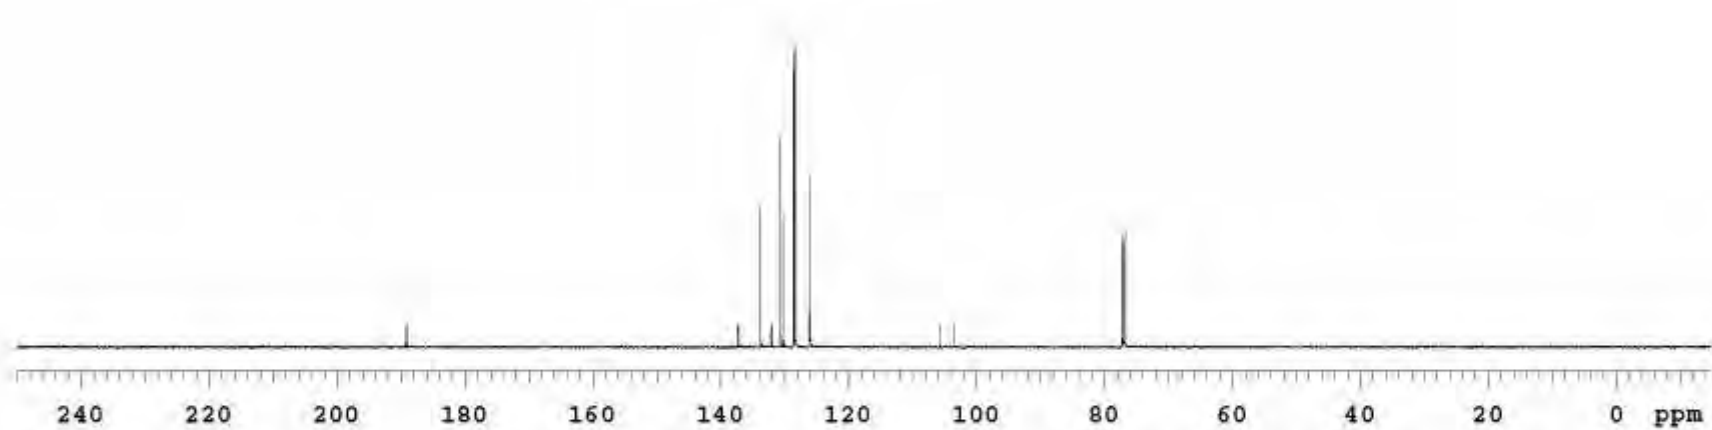

**$^1\text{H}$  NMR of Quinoline-6-bromo-fluoroacetophenone (2m')**CDCl<sub>3</sub>, 23 °C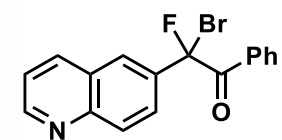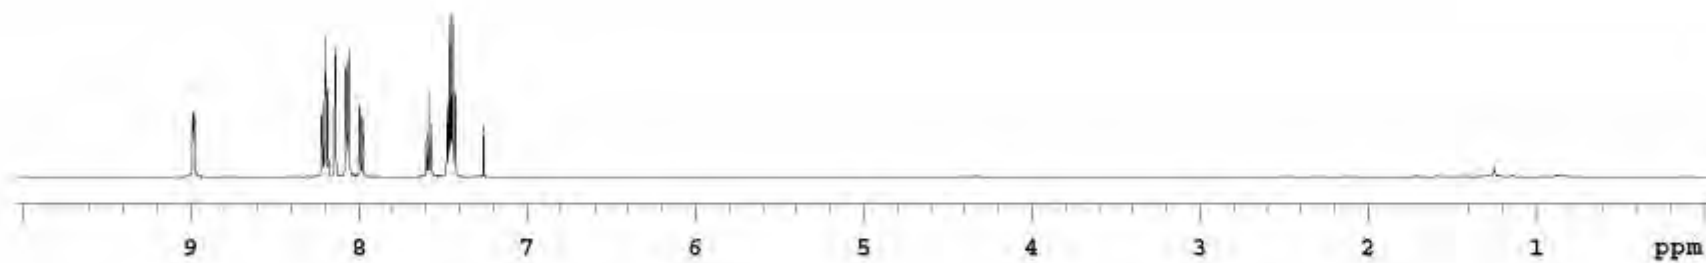

**$^{19}\text{F}$  NMR of Quinoline-6-bromo-fluoroacetophenone (2m')**CDCl<sub>3</sub>, 23 °C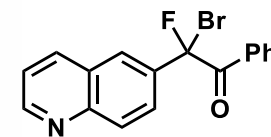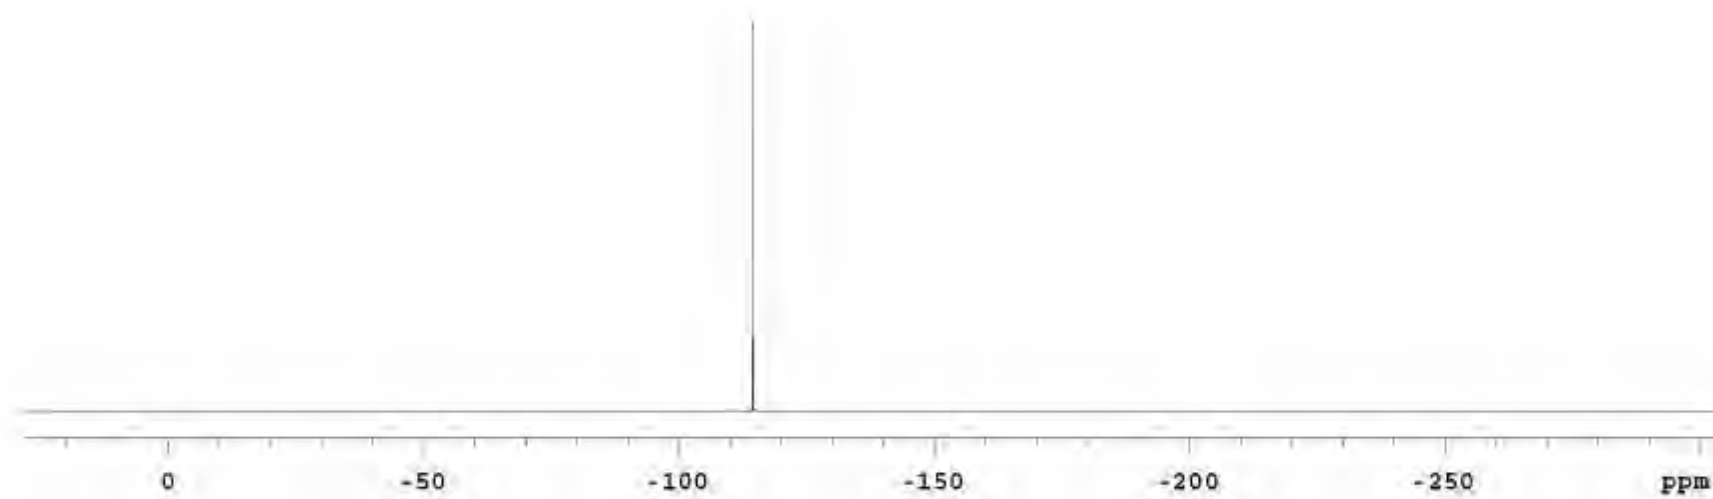

**$^{13}\text{C}$  NMR of Quinoline-6-bromo-fluoroacetophenone (2m')**CDCl<sub>3</sub>, 25 °C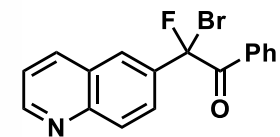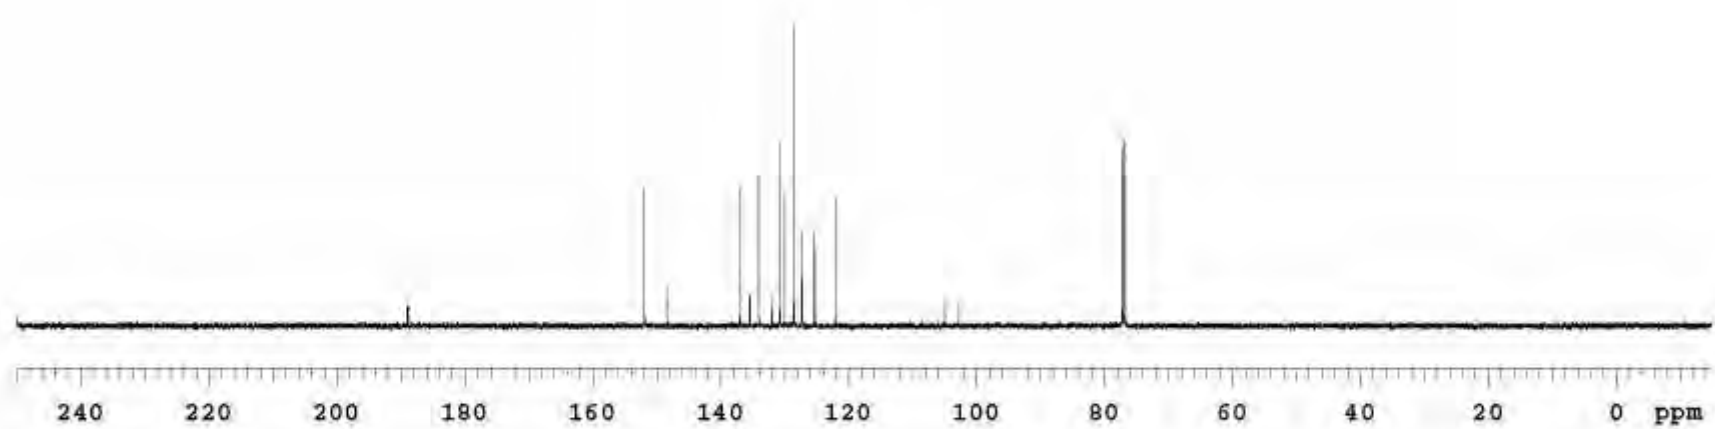

**$^1\text{H}$  NMR of Difluoromethyl-benzodioxole (3a)**CDCl<sub>3</sub>, 24 °C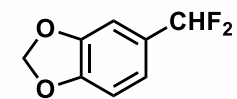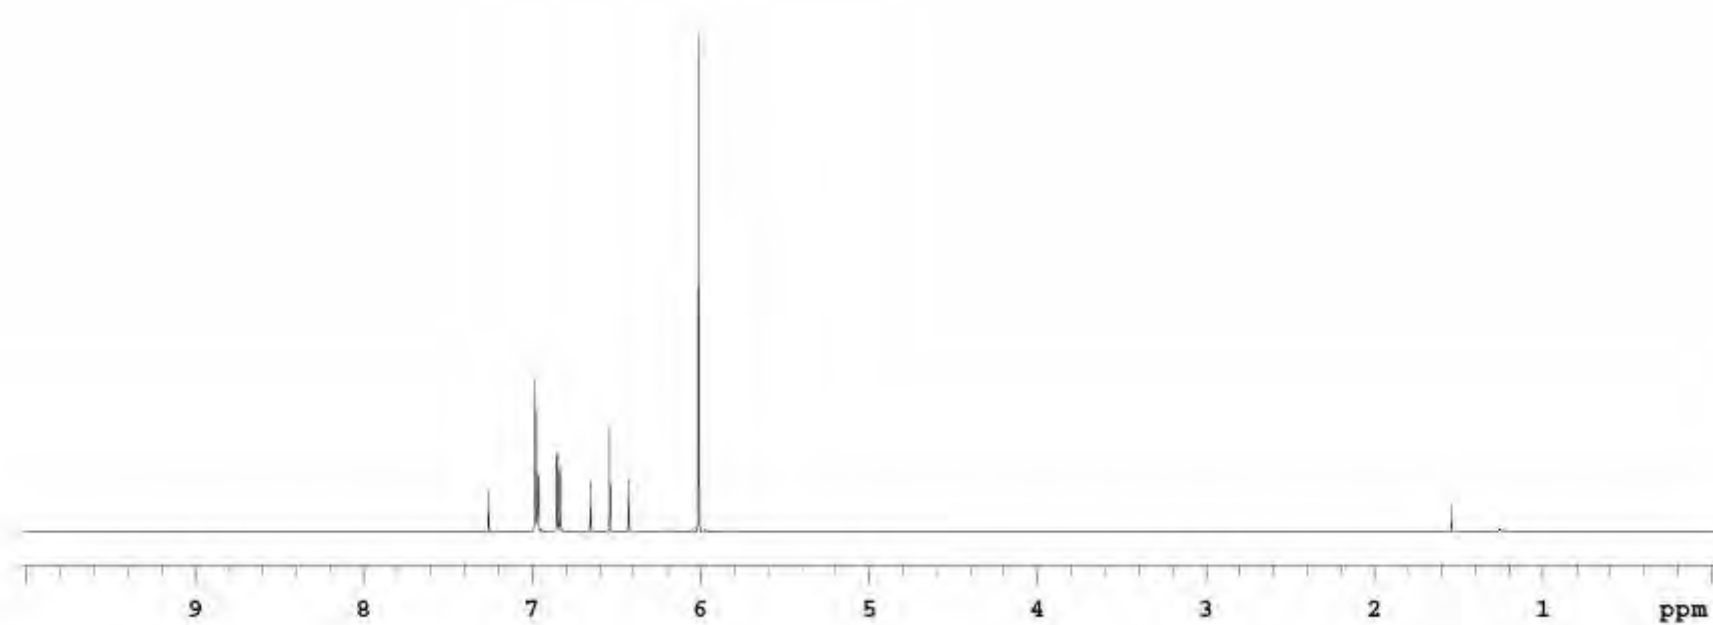

**$^{19}\text{F}$  NMR of Difluoromethyl-benzodioxole (3a)**CDCl<sub>3</sub>, 24 °C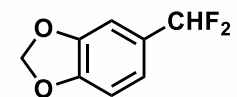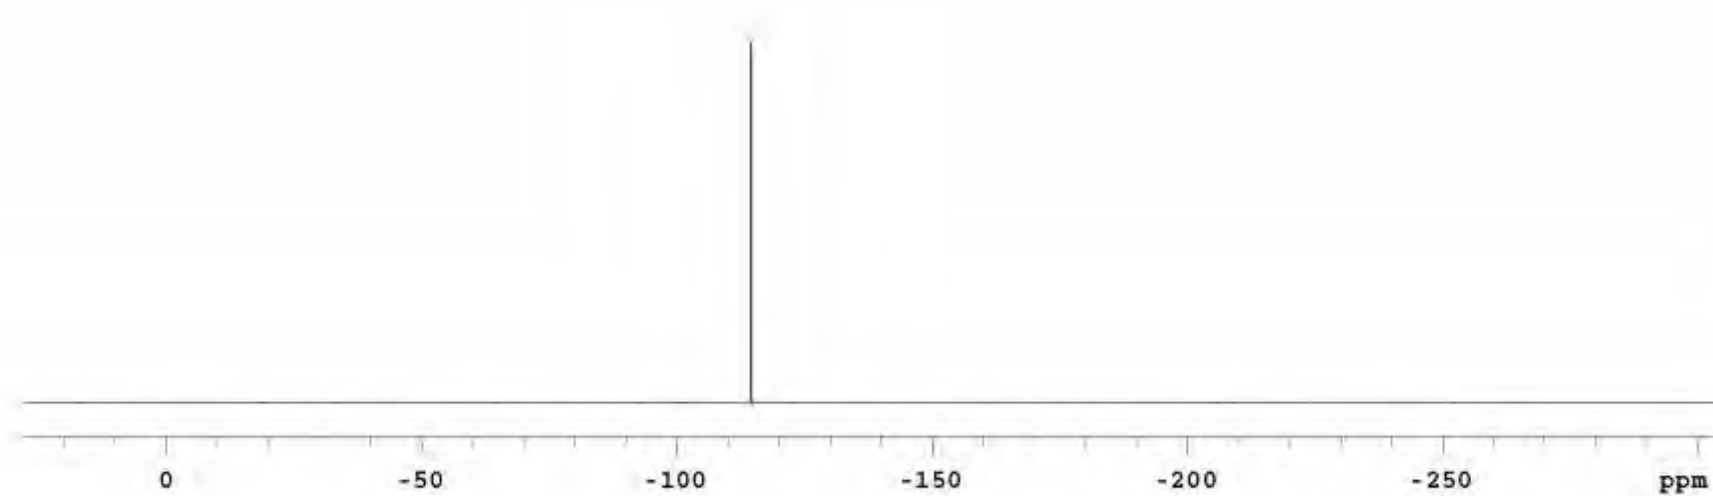

**$^{13}\text{C}$  NMR of Difluoromethyl-benzodioxole (3a)**CDCl<sub>3</sub>, 25 °C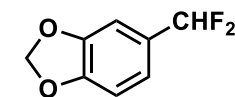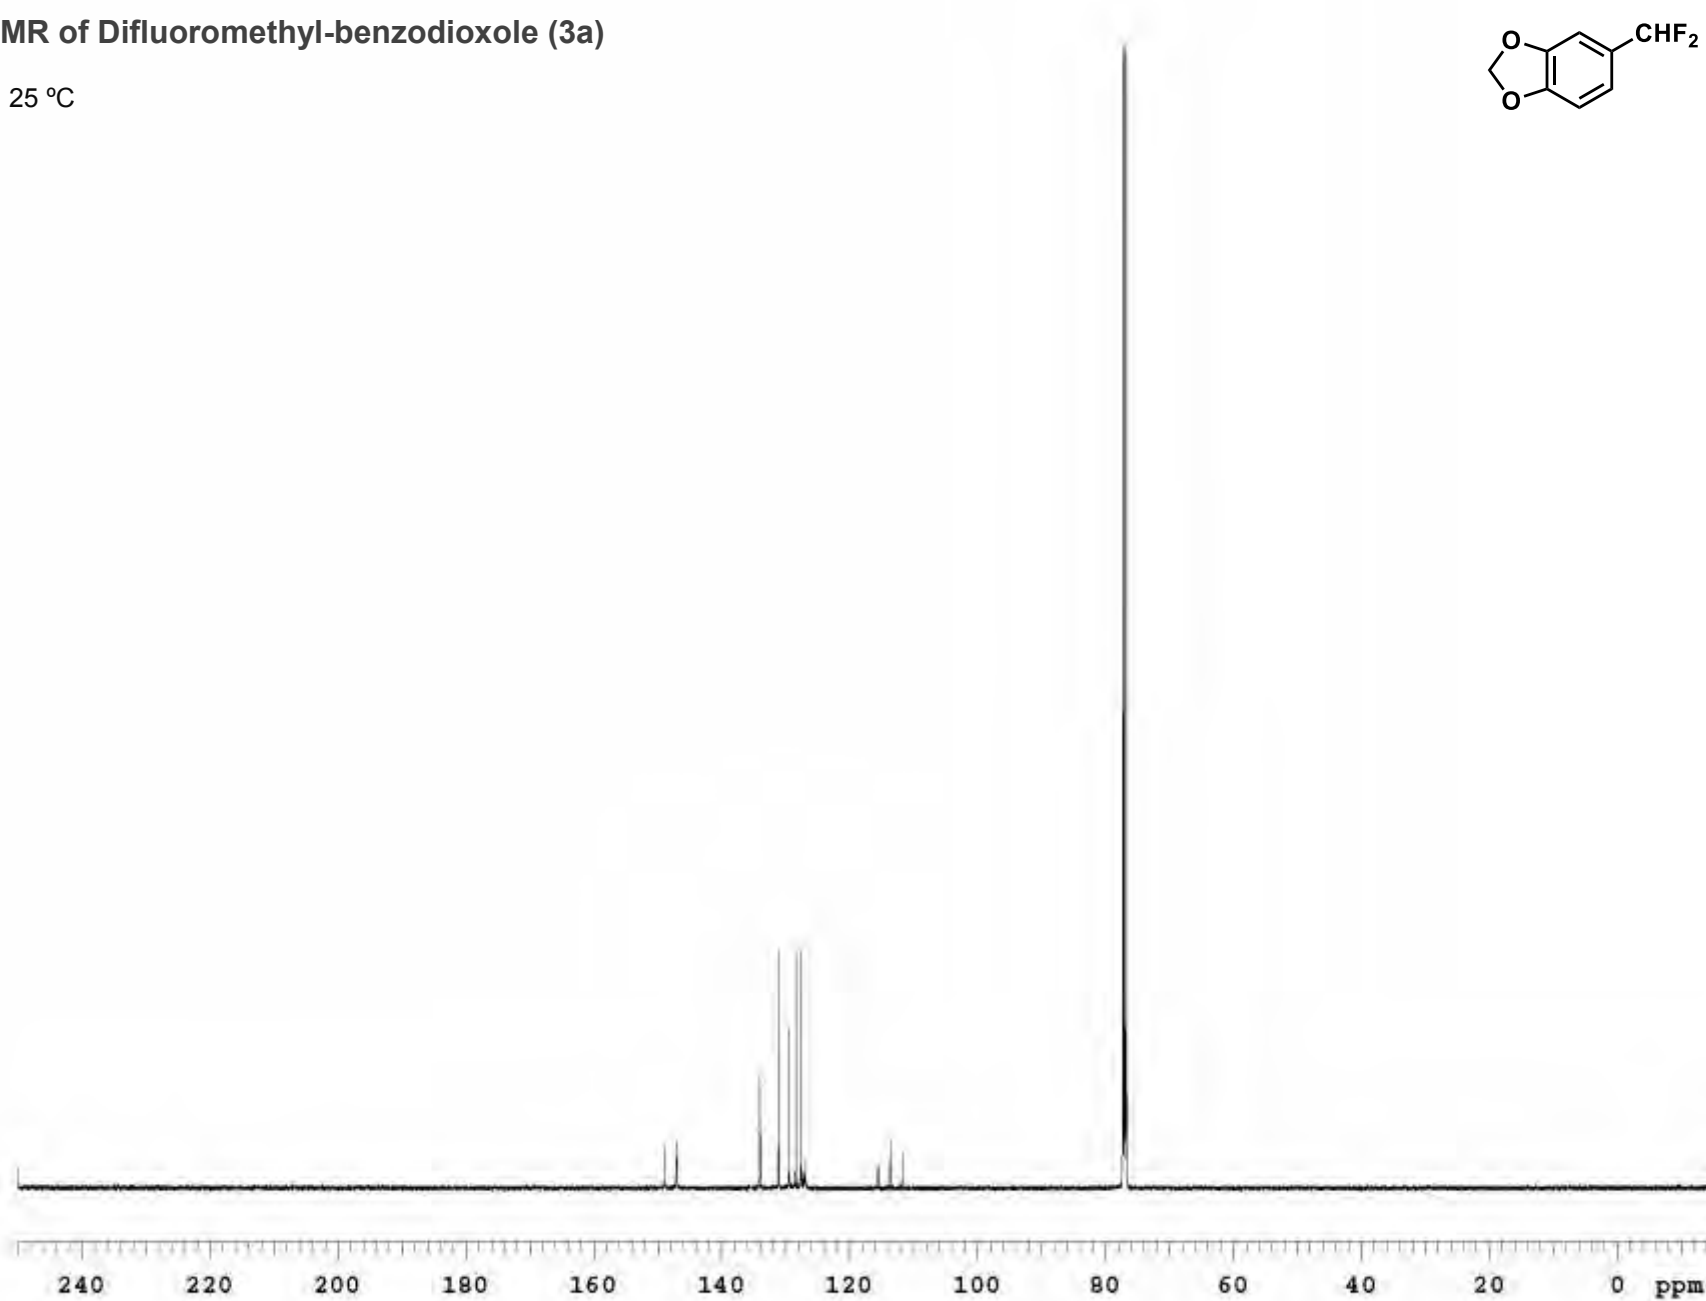



**$^1\text{H}$  NMR of 3-Cyanocyclopropyl-difluoromethylbenzene (3c)**CDCl<sub>3</sub>, 25 °C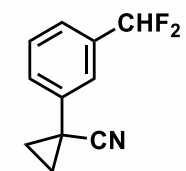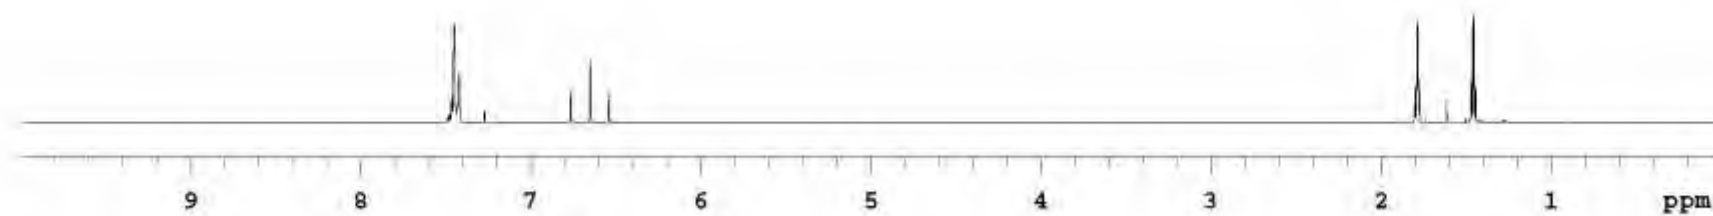

**$^{19}\text{F}$  NMR of 3-Cyanocyclopropyl-difluoromethylbenzene (3c)**CDCl<sub>3</sub>, 25 °C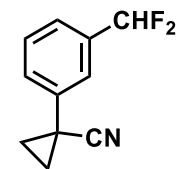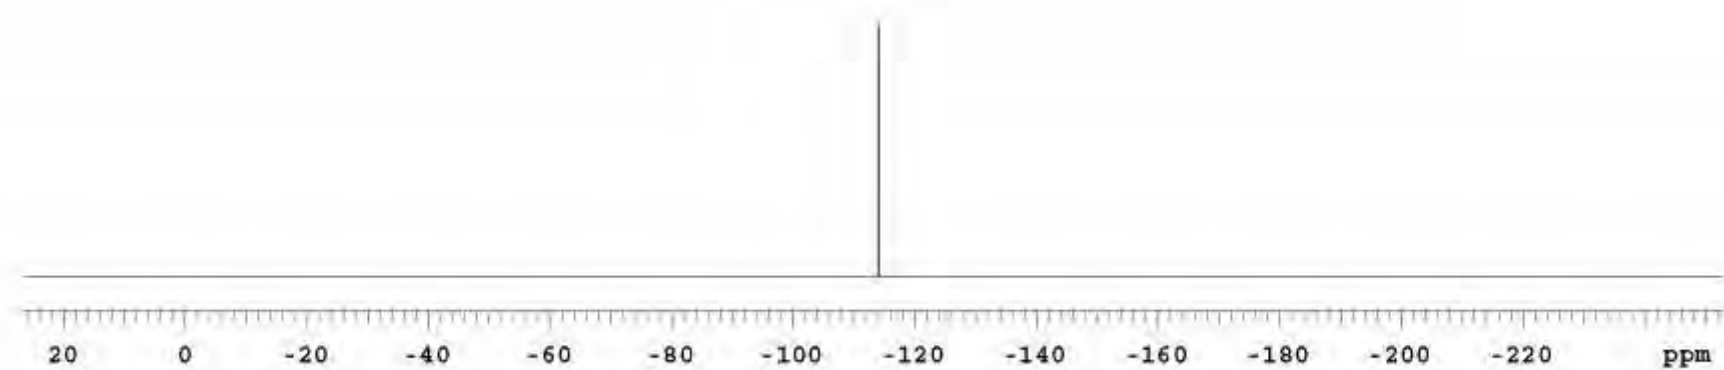

**$^{13}\text{C}$  NMR of 3-Cyanocyclopropyl-difluoromethylbenzene (3c)**CDCl<sub>3</sub>, 25 °C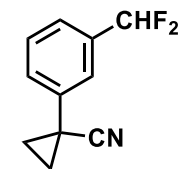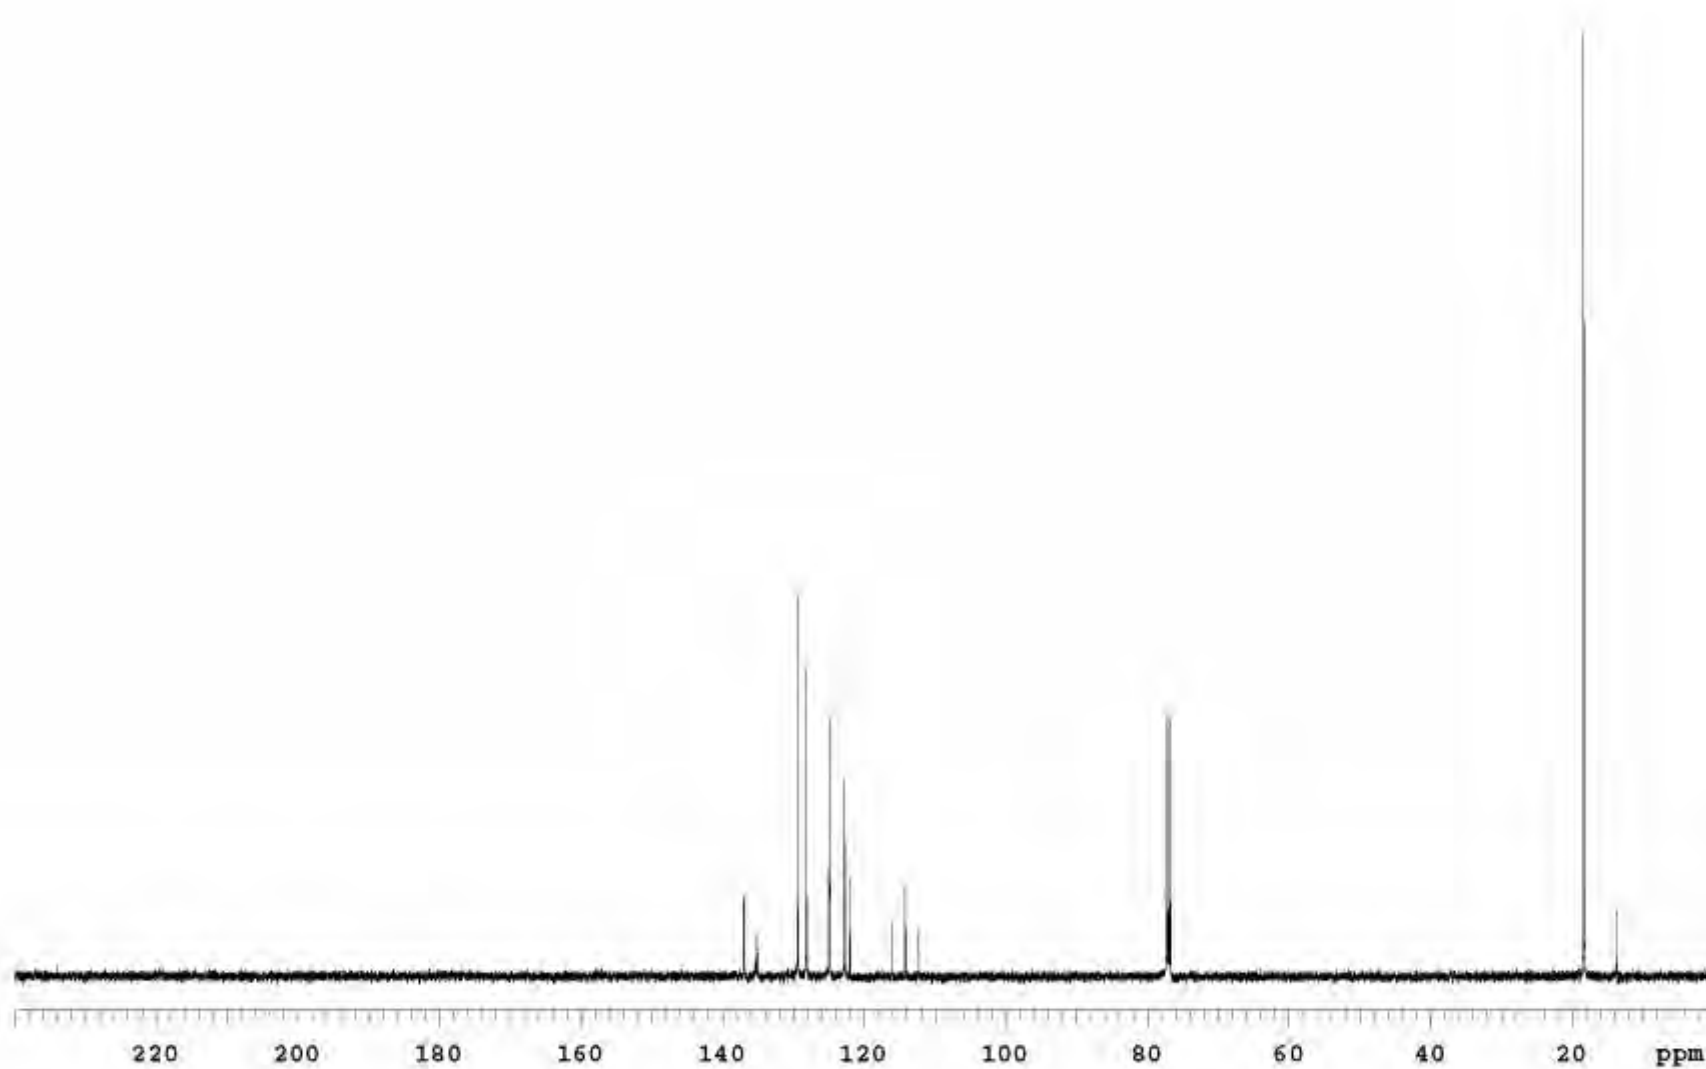

**$^1\text{H}$  NMR of 3-*isopropanolyl*-difluoromethylbenzene (3d)**CDCl<sub>3</sub>, 25 °C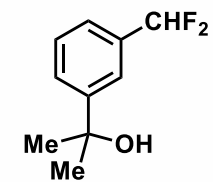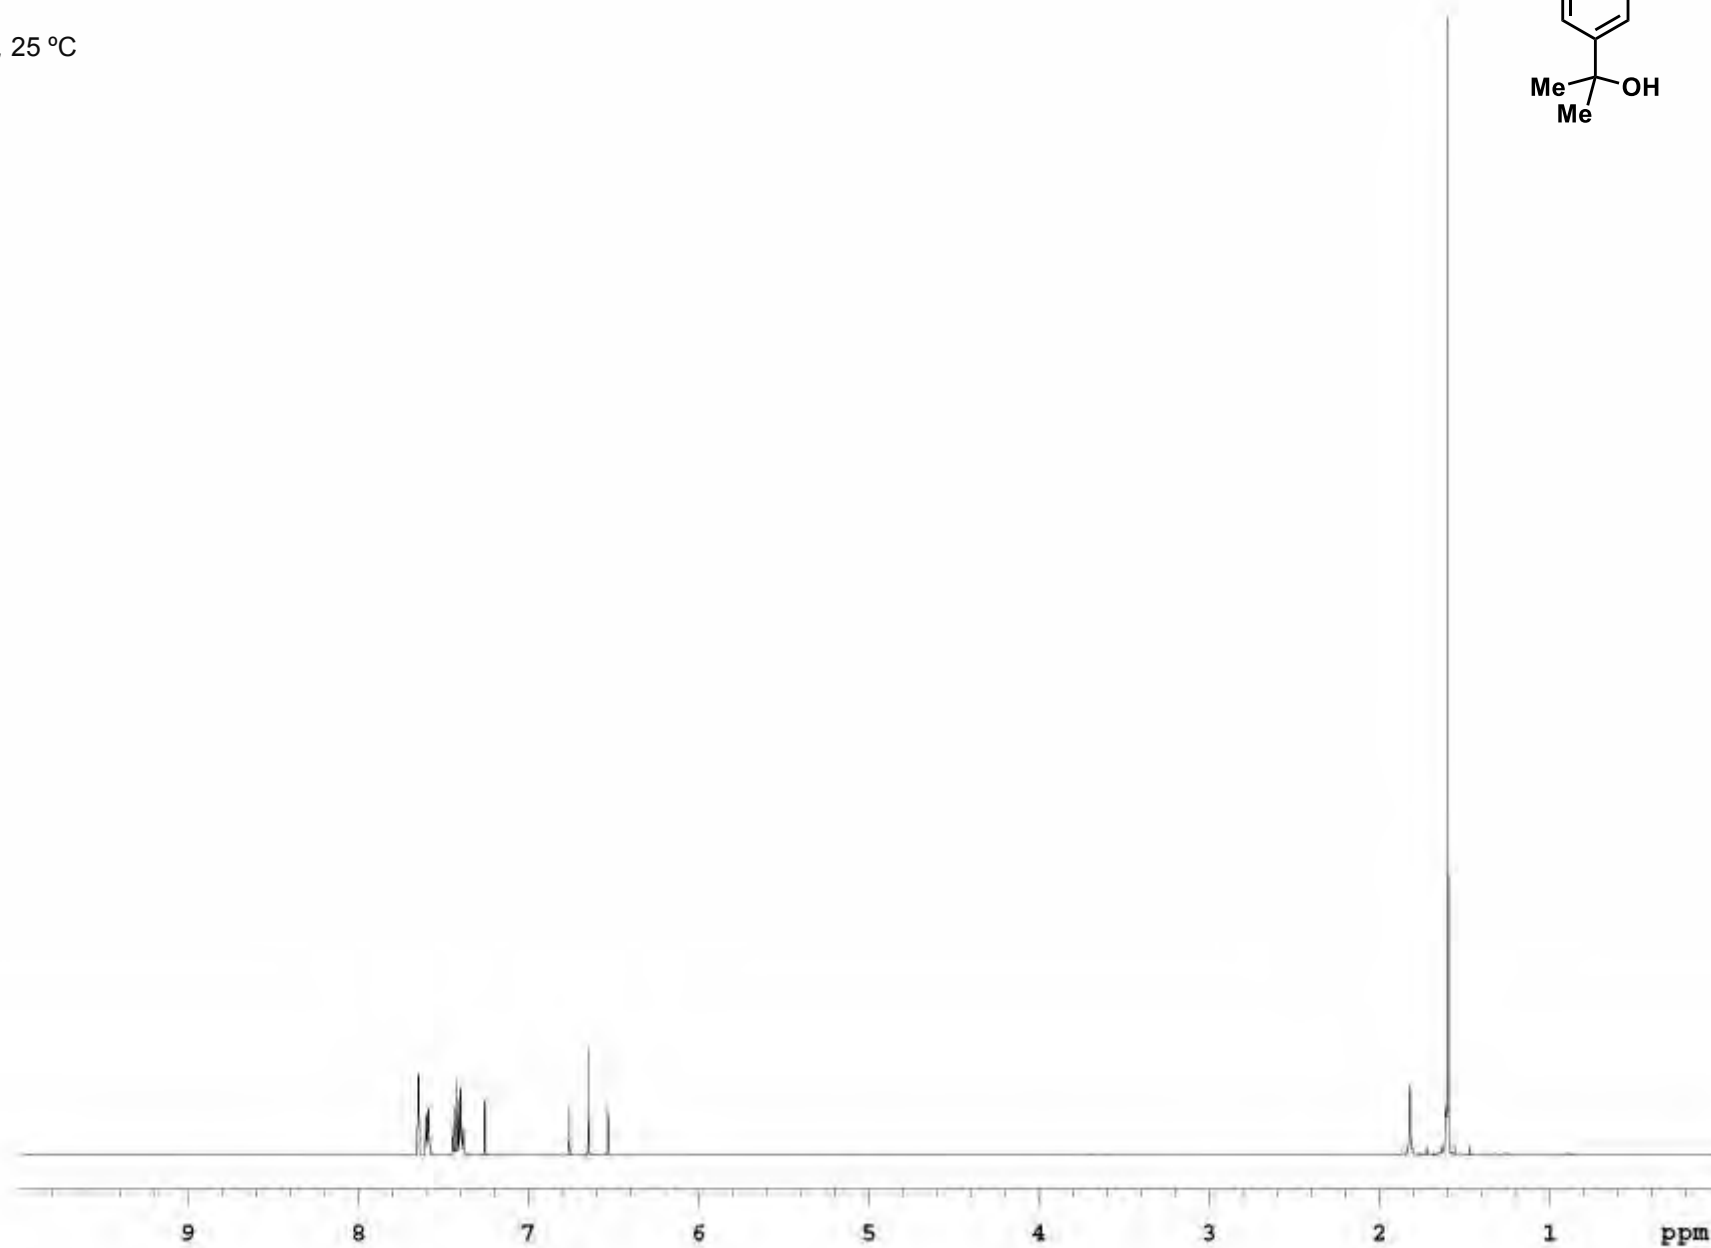

**$^{19}\text{F}$  NMR of 3-isopropanolyldifluoromethylbenzene (3d)**CDCl<sub>3</sub>, 25 °C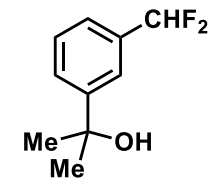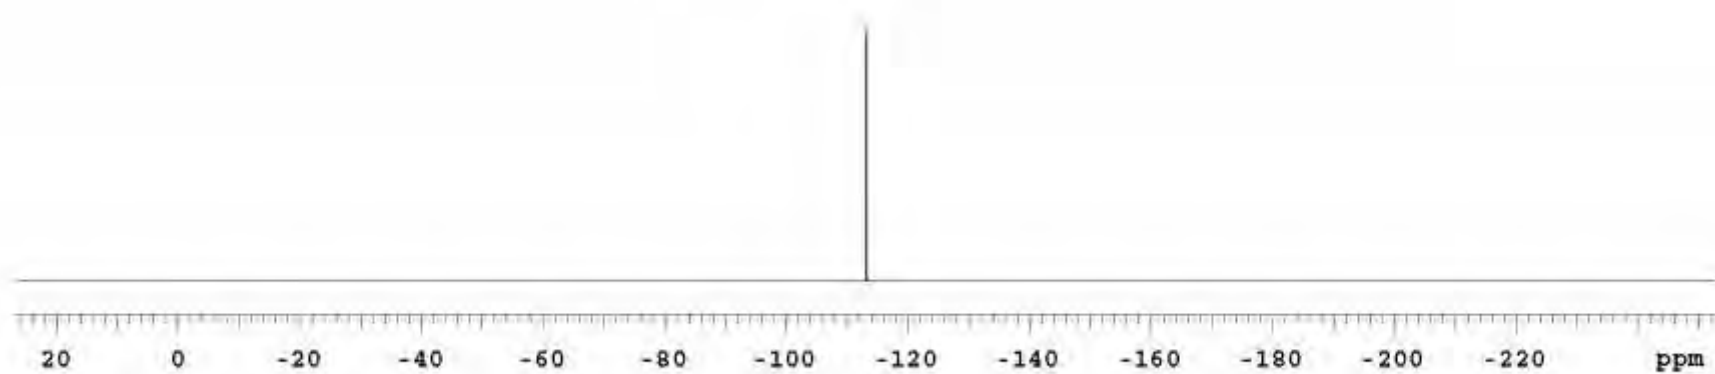

**$^{13}\text{C}$  NMR of 3-/isopropanolyl-difluoromethylbenzene (3d)**CDCl<sub>3</sub>, 25 °C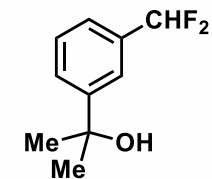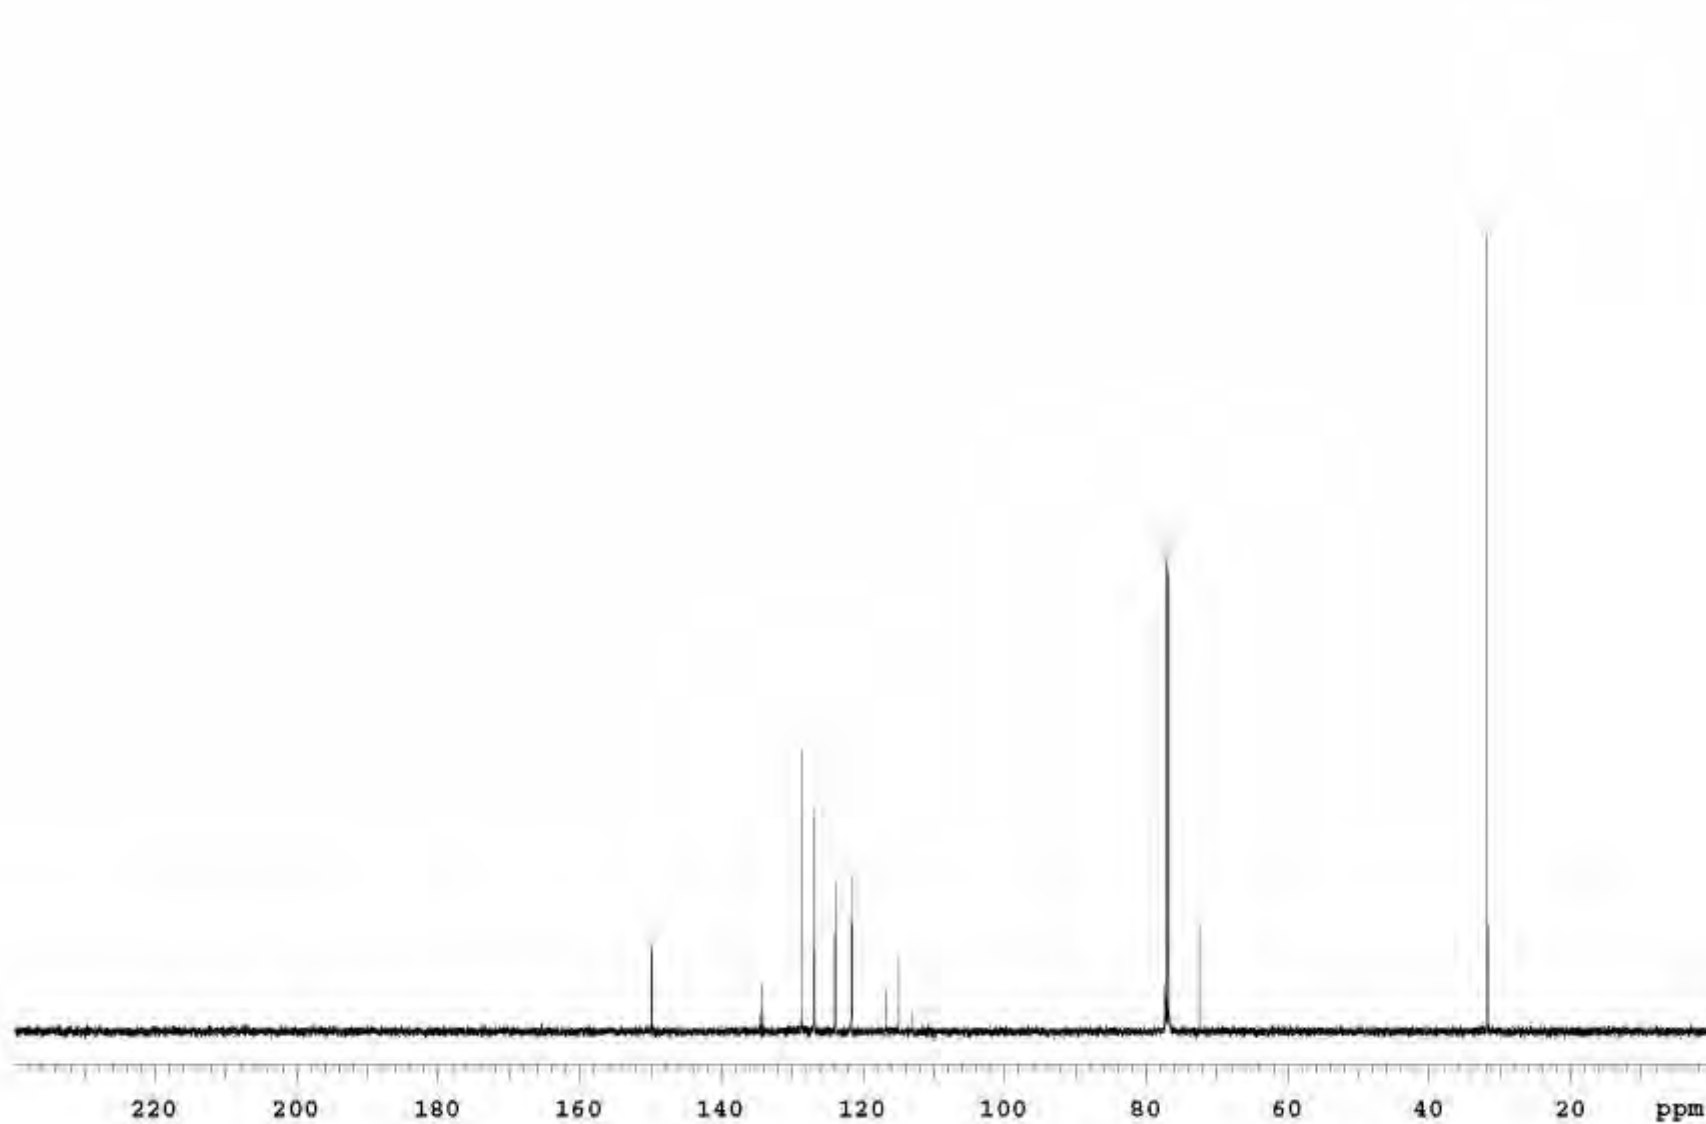

**$^1\text{H}$  NMR of 3-Chloro-5-(phenylethynyl)-difluoromethylbenzene (3e)**CDCl<sub>3</sub>, 23 °C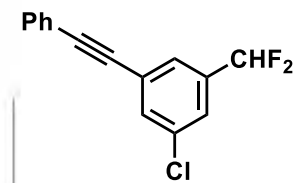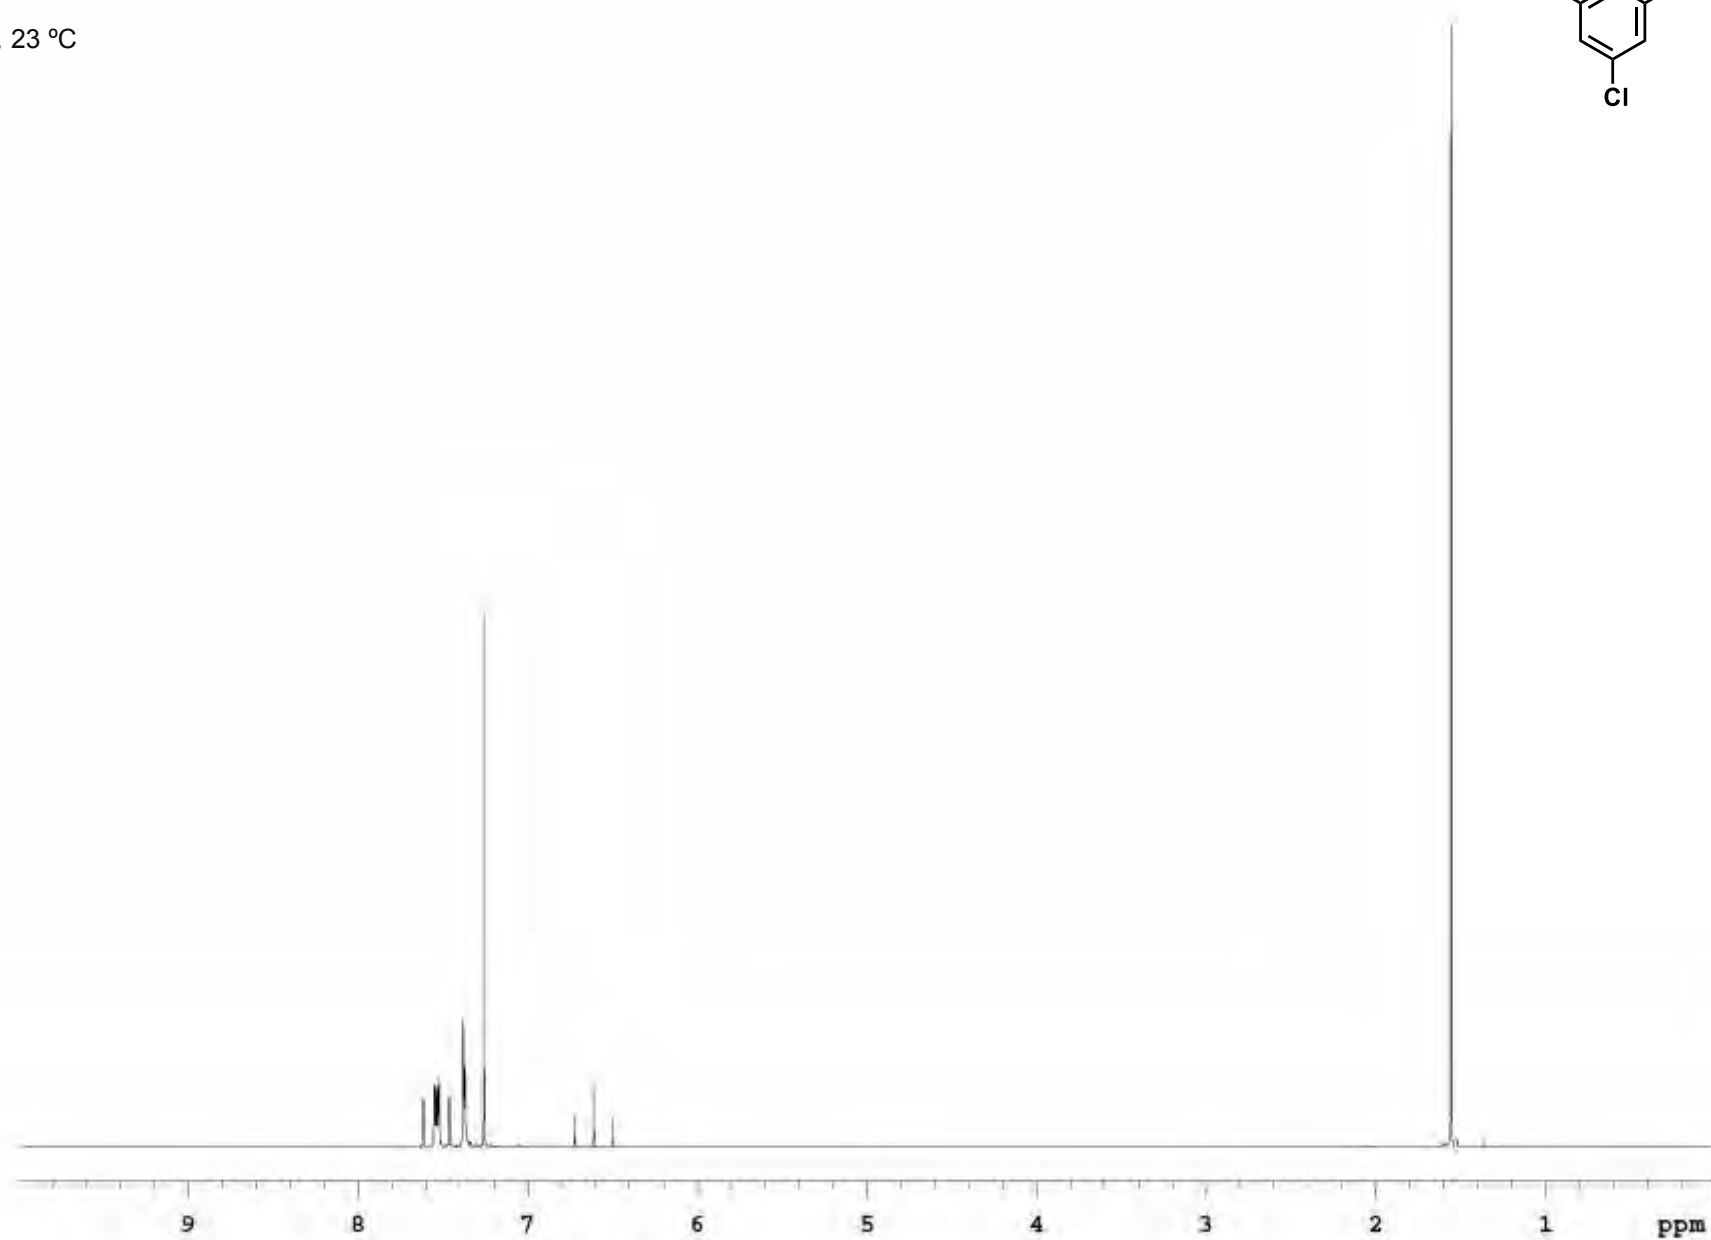

**$^{19}\text{F}$  NMR of 3-Chloro-5-(phenylethynyl)-difluoromethylbenzene (3e)**CDCl<sub>3</sub>, 23 °C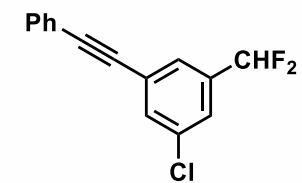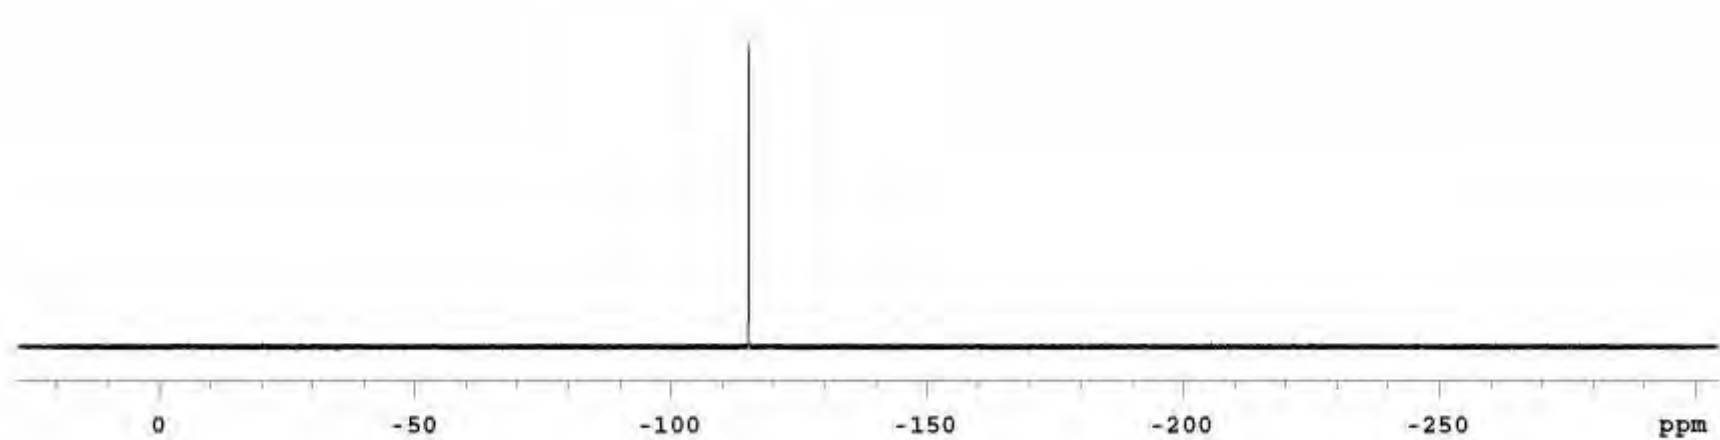



**$^{13}\text{C}$  NMR of 3-Chloro-5-(phenylethynyl)-difluoromethylbenzene (3e)**CDCl<sub>3</sub>, 23 °C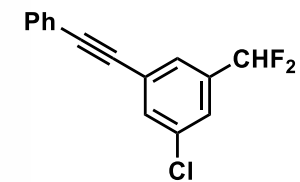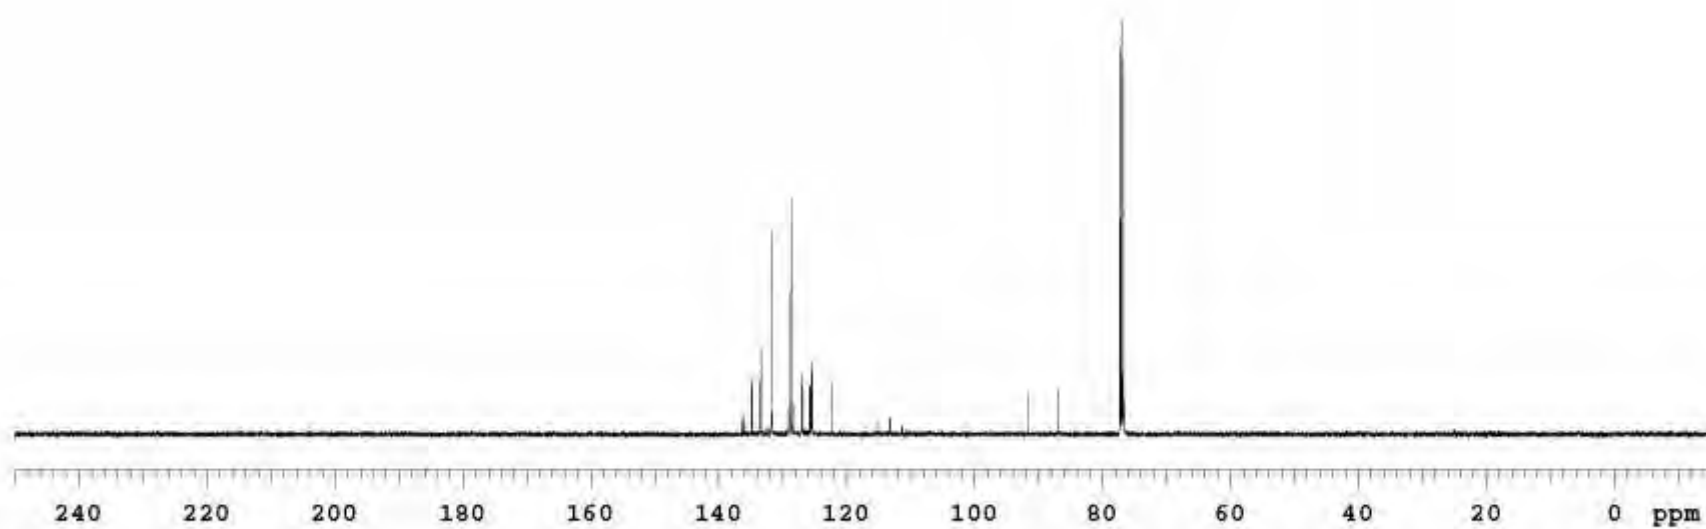

**$^1\text{H}$  NMR of 4-Pyrazolyl-difluoromethylbenzene (3f)**CDCl<sub>3</sub>, 23 °C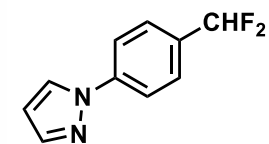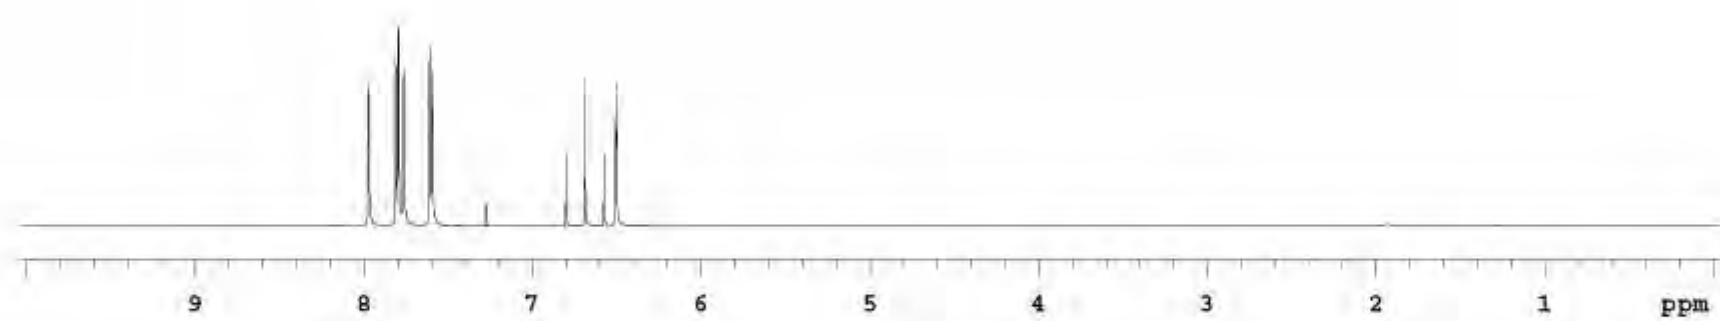

**$^{19}\text{F}$  NMR of 4-Pyrazolyl-difluoromethylbenzene (3f)**CDCl<sub>3</sub>, 21 °C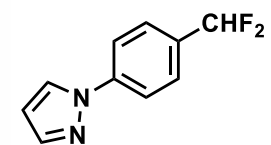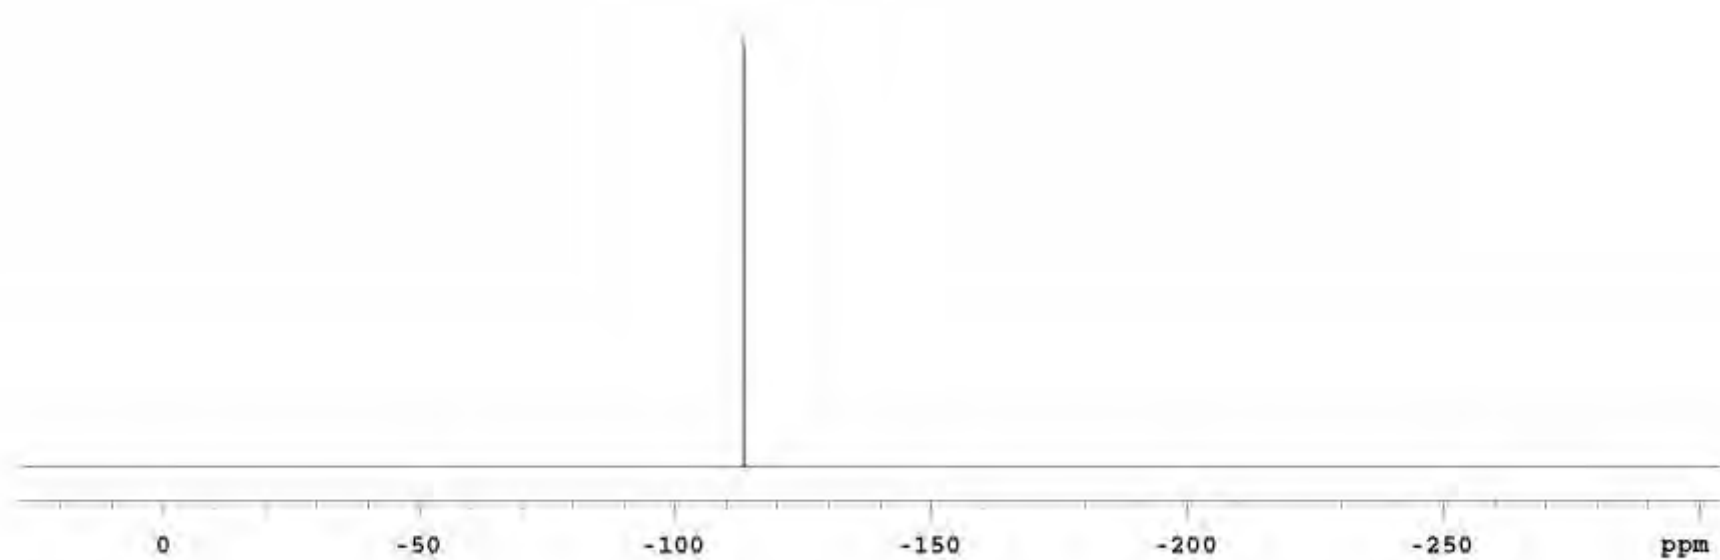

**$^{13}\text{C}$  NMR of 4-Pyrazolyl-difluoromethylbenzene (3f)**CDCl<sub>3</sub>, 23 °C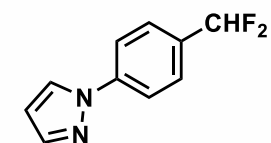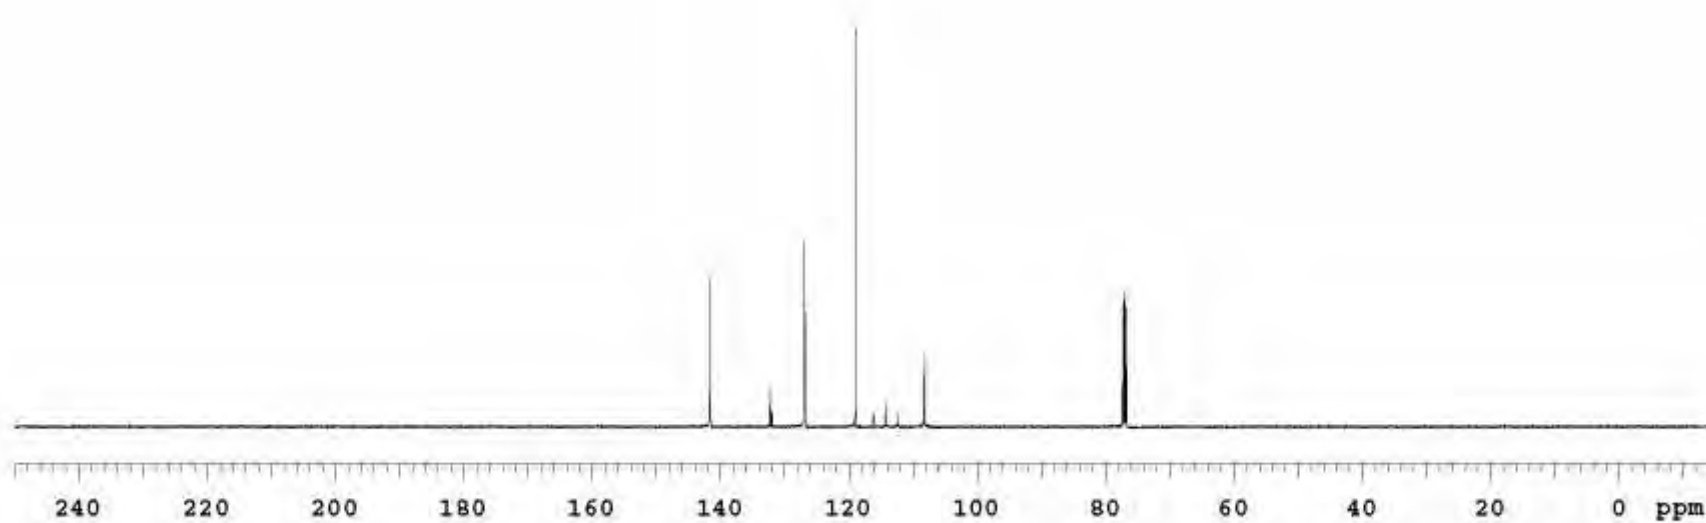

**$^1\text{H}$  NMR of 3-Morpholino-difluoromethylbenzene (3g)**CDCl<sub>3</sub>, 25 °C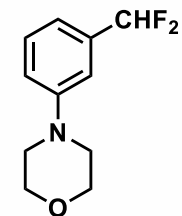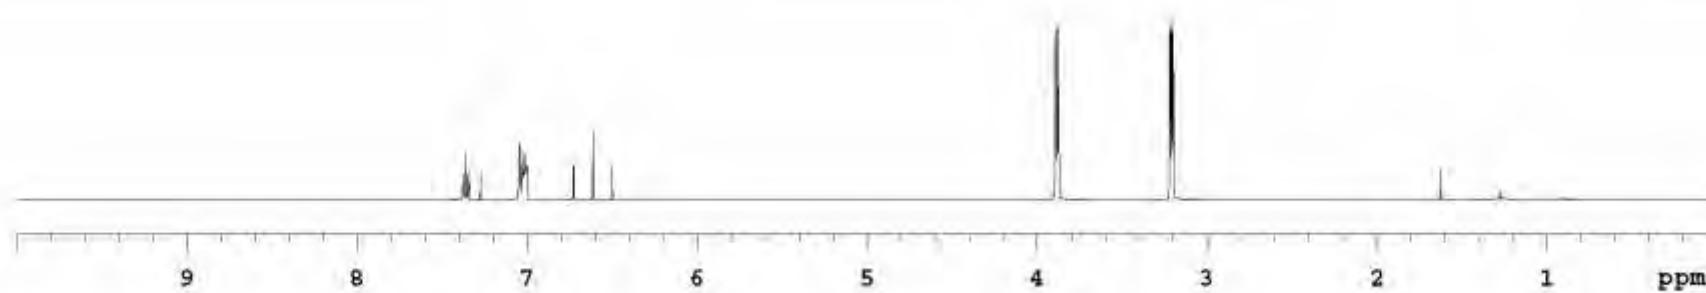

**$^{19}\text{F}$  NMR of 3-Morpholino-difluoromethylbenzene (3g)**CDCl<sub>3</sub>, 25 °C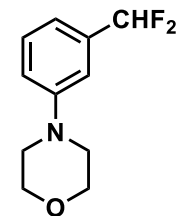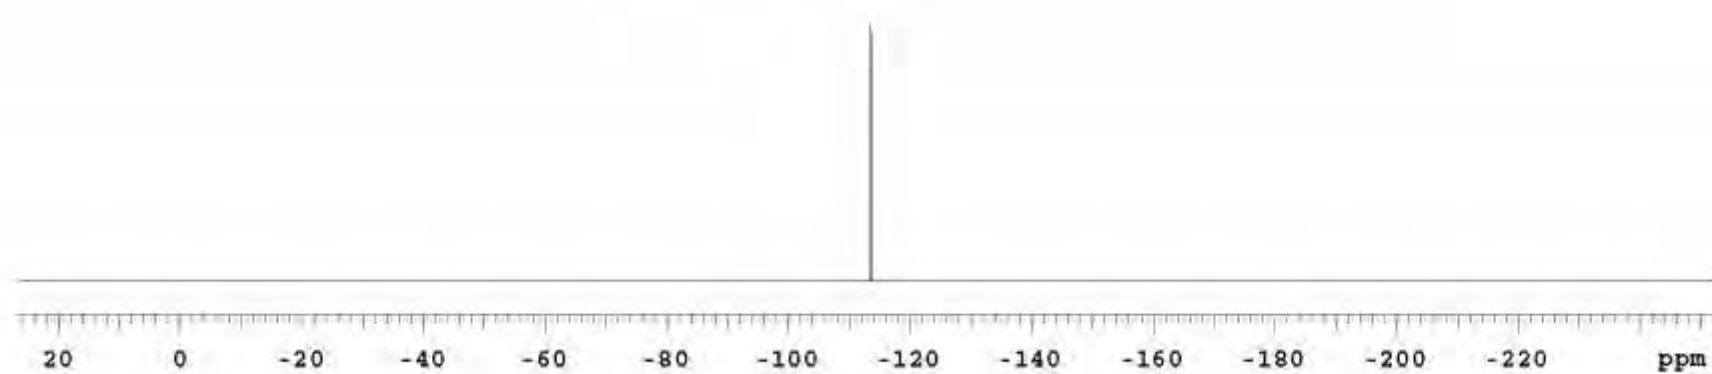

**$^{13}\text{C}$  NMR of 3-Morpholino-difluoromethylbenzene (3g)**CDCl<sub>3</sub>, 25 °C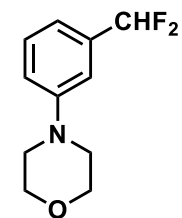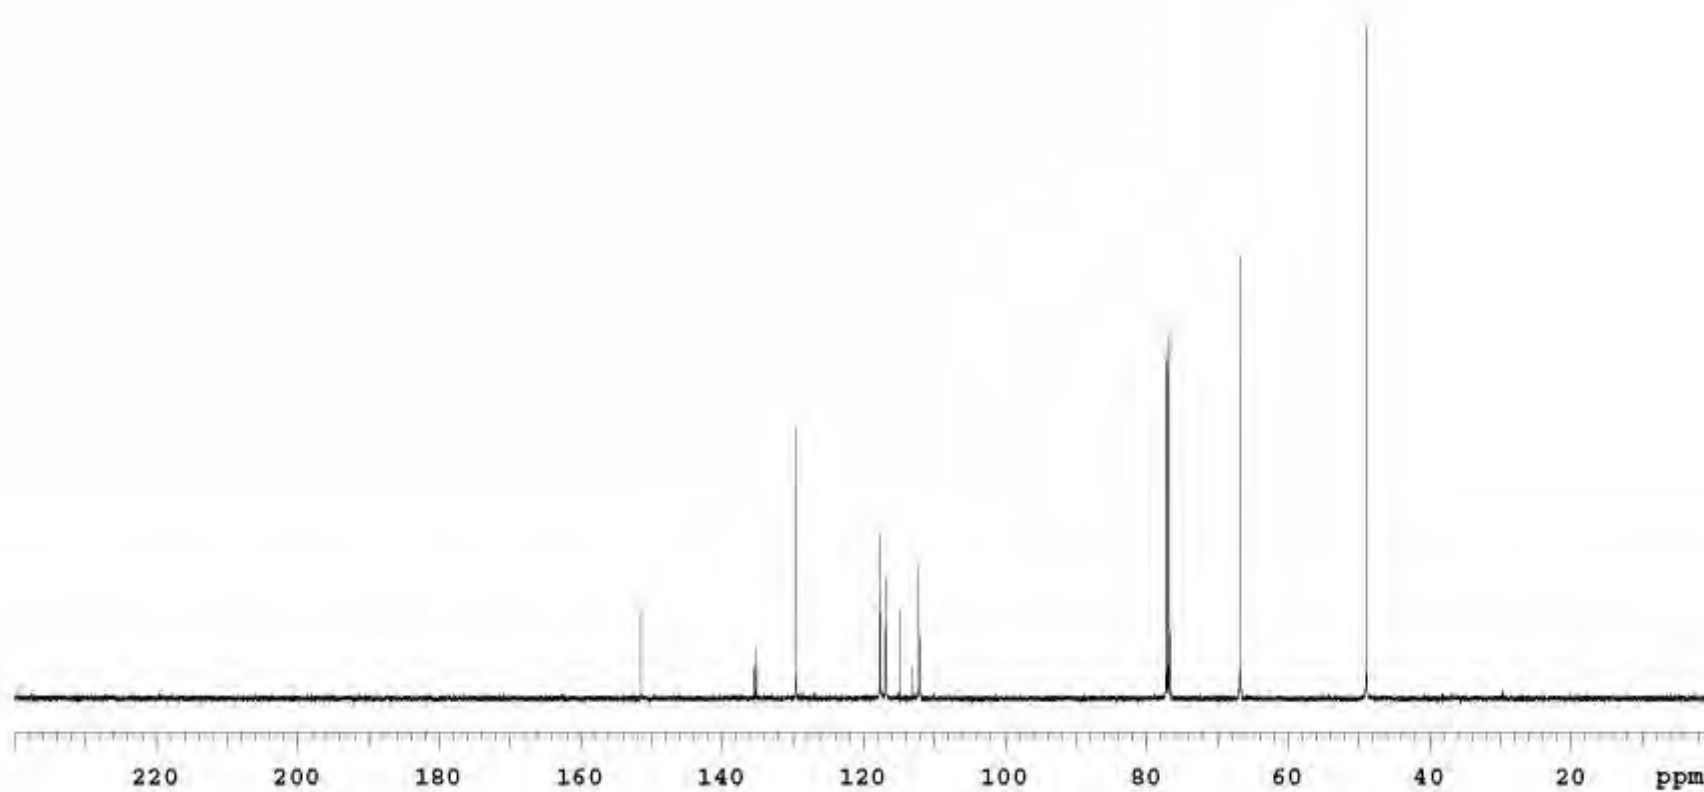

**$^1\text{H}$  NMR of 2-Difluoromethylfluoren-9-one (3i)**CDCl<sub>3</sub>, 25 °C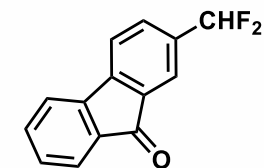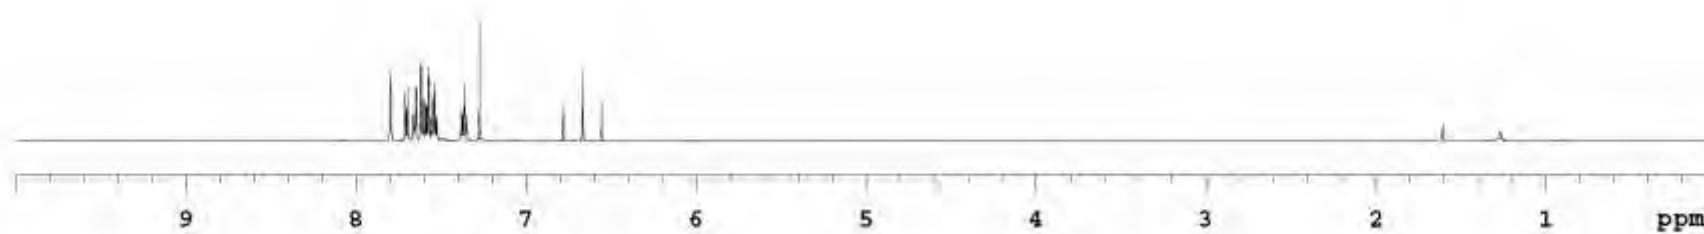



**$^{19}\text{F}$  NMR of 2-Difluoromethylfluoren-9-one (3i)**CDCl<sub>3</sub>, 25 °C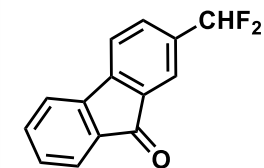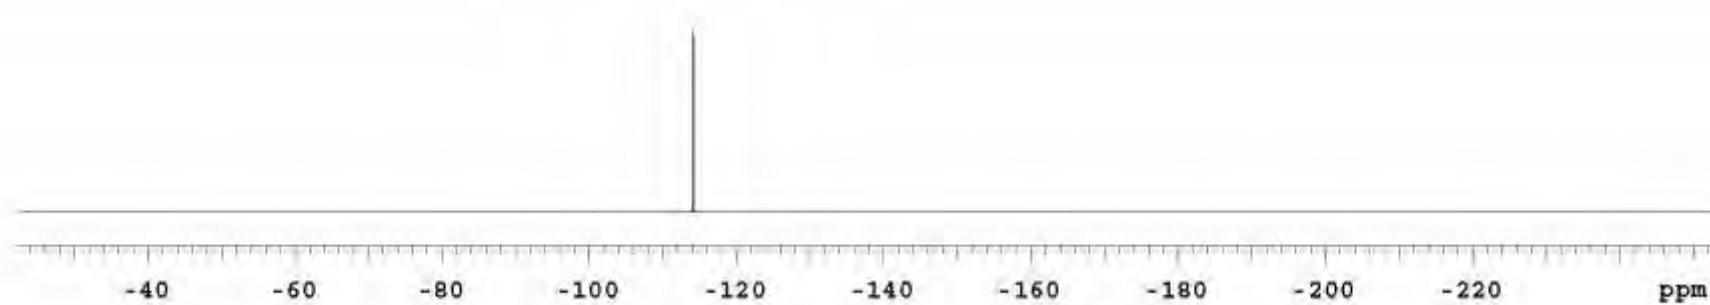

**$^{13}\text{C}$  NMR of 2-Difluoromethylfluoren-9-one (3i)**CDCl<sub>3</sub>, 25 °C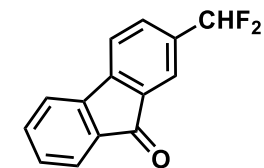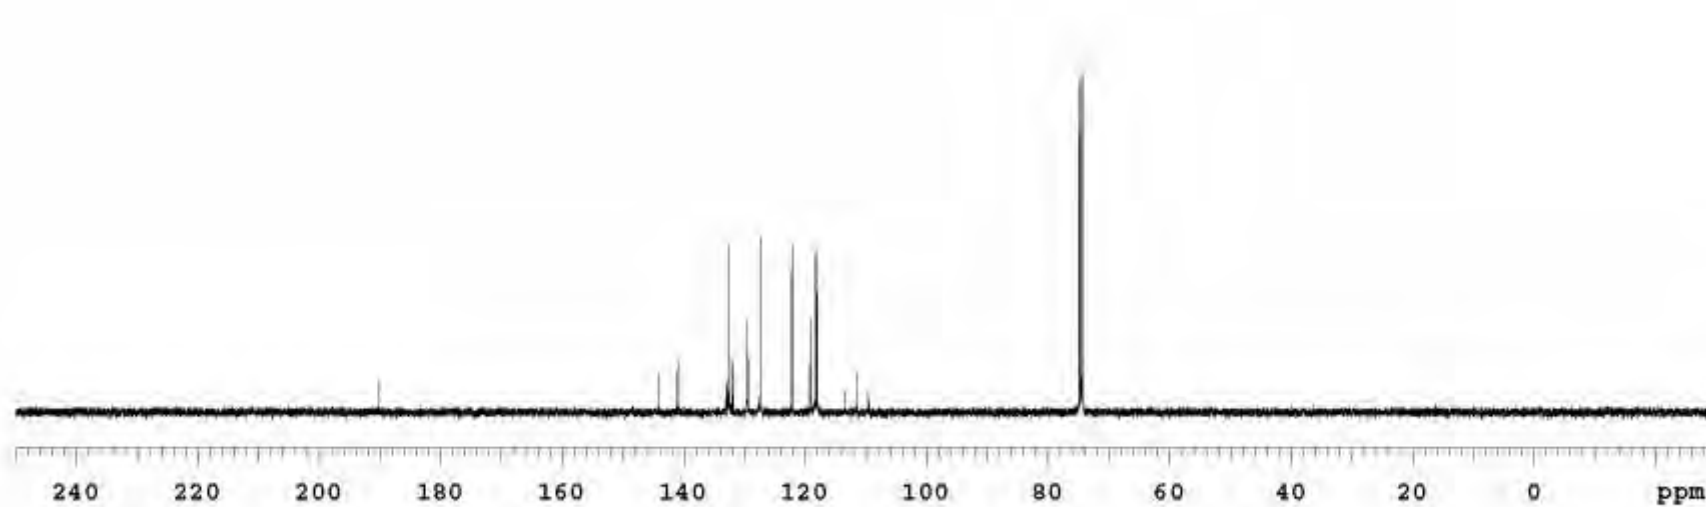

**$^1\text{H}$  NMR of 2-Chlorophenyl-(4-difluoromethyl)phenyl-methanone (3I)**CDCl<sub>3</sub>, 24 °C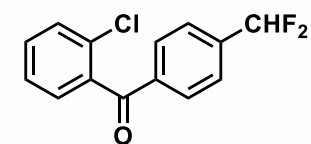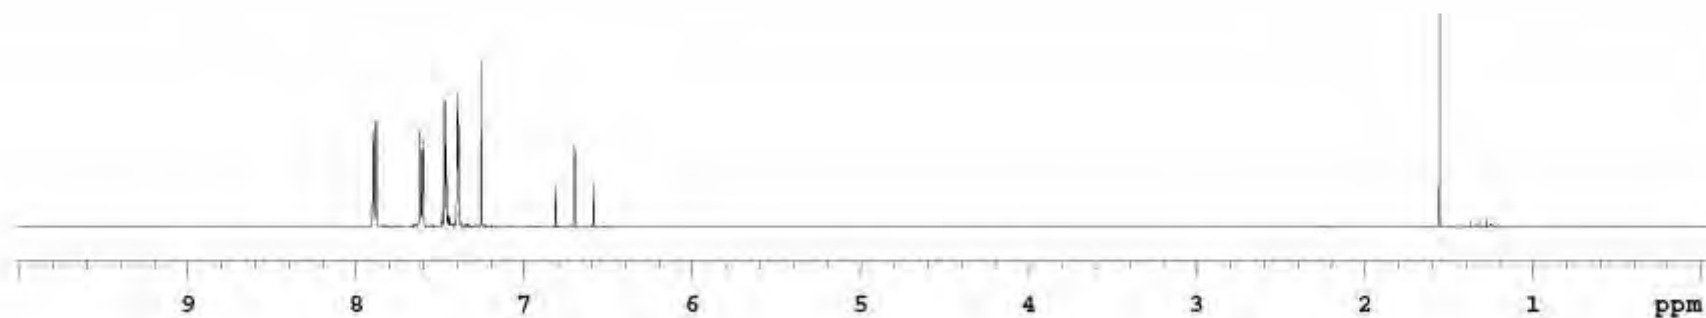

**$^{19}\text{F}$  NMR of 2-Chlorophenyl-(4-difluoromethyl)phenyl-methanone (3I)**CDCl<sub>3</sub>, 24 °C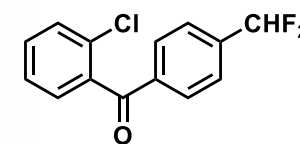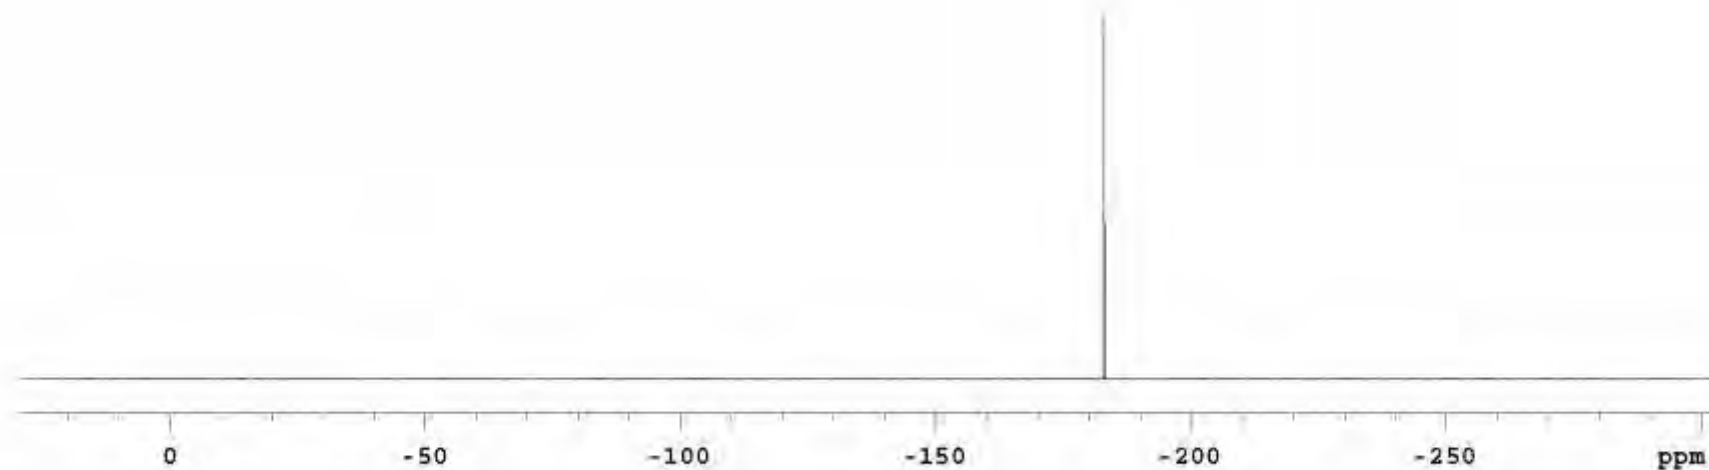

**$^{13}\text{C}$  NMR of 2-Chlorophenyl-(4-difluoromethyl)phenyl-methanone (3I)**CDCl<sub>3</sub>, 25 °C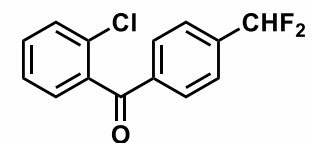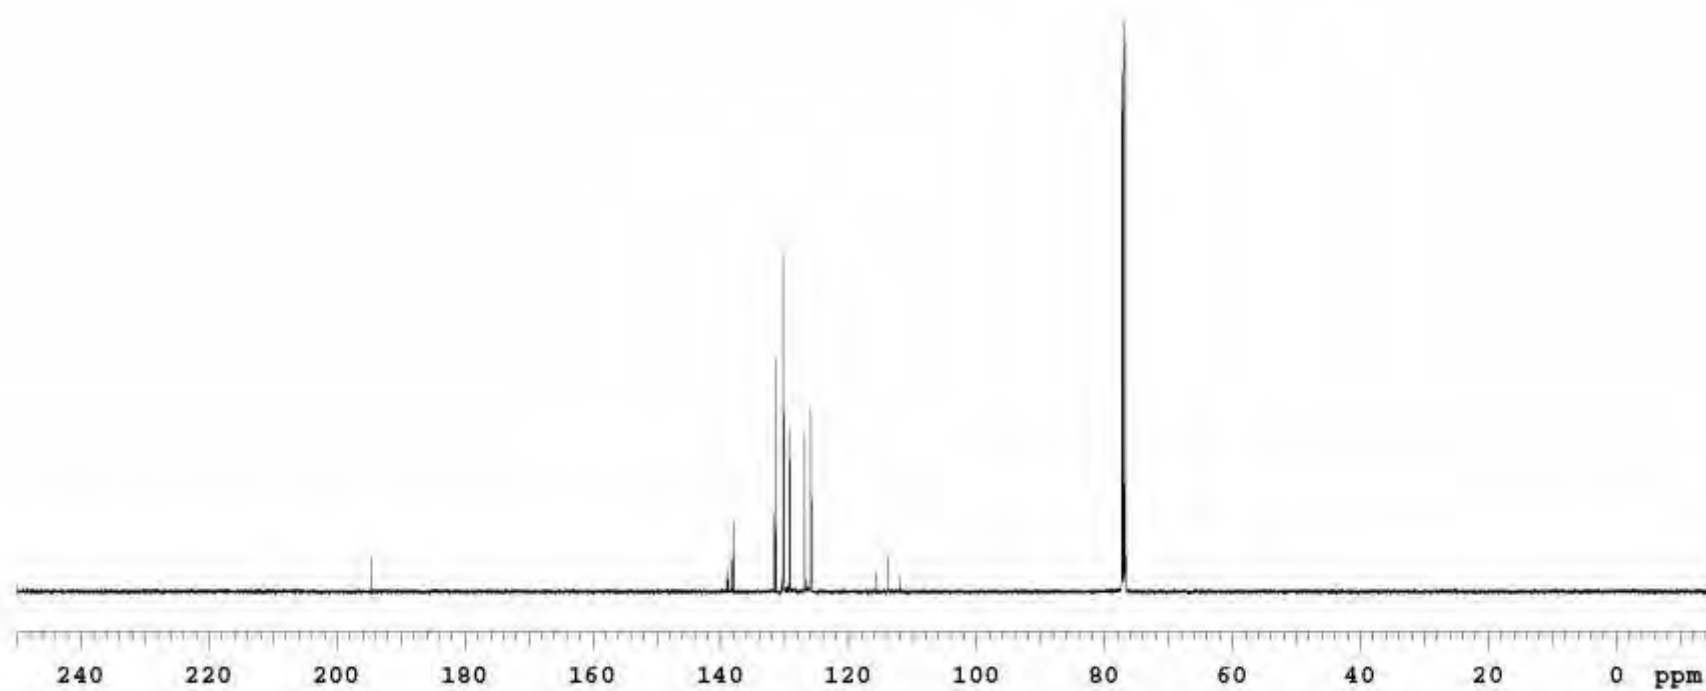

**$^1\text{H}$  NMR of 5-Difluoromethyl-2-methylbenzo[*d*]thiazole (3n)**CDCl<sub>3</sub>, 23 °C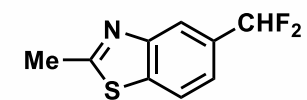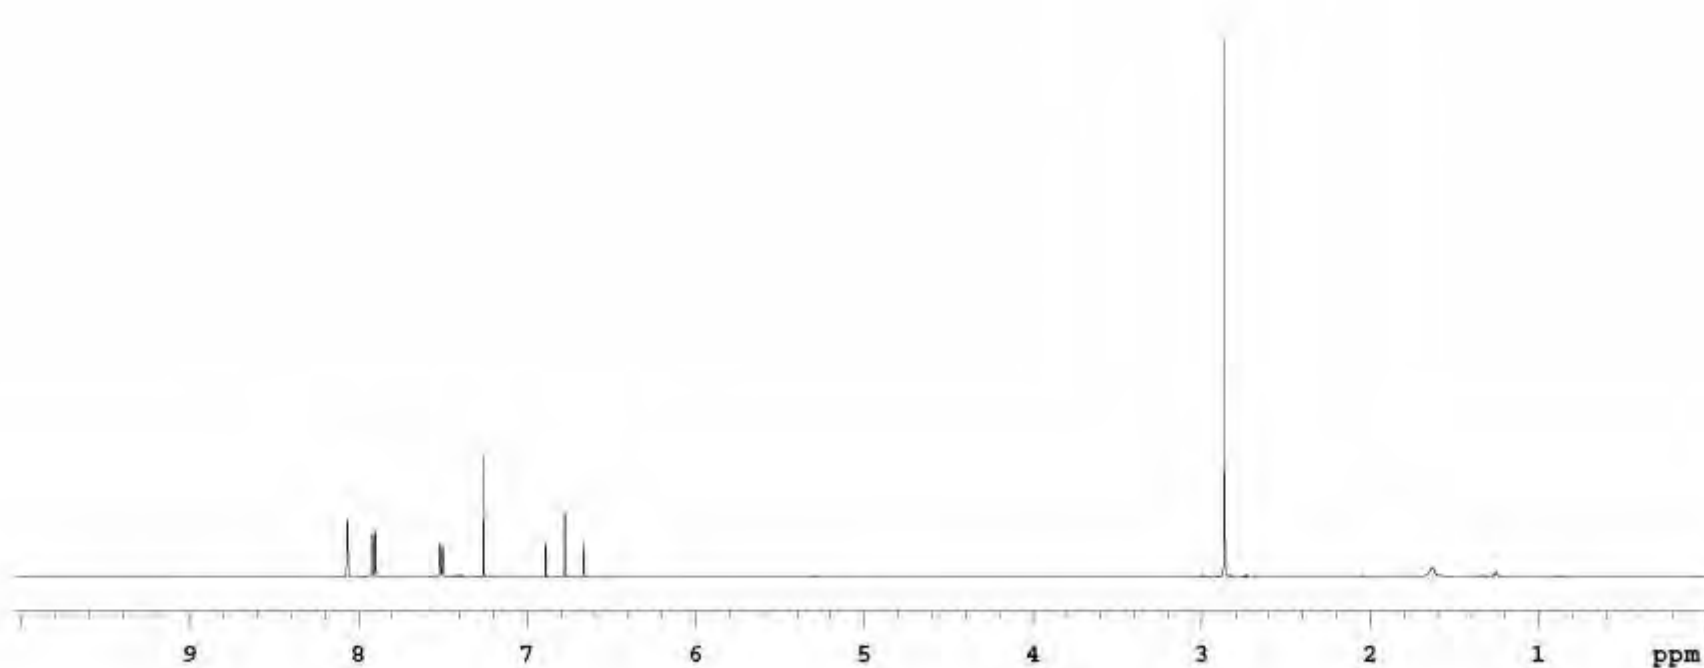

**$^{19}\text{F}$  NMR of 5-Difluoromethyl-2-methylbenzo[*d*]thiazole (3n)**CDCl<sub>3</sub>, 25 °C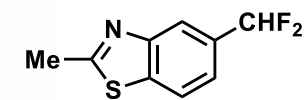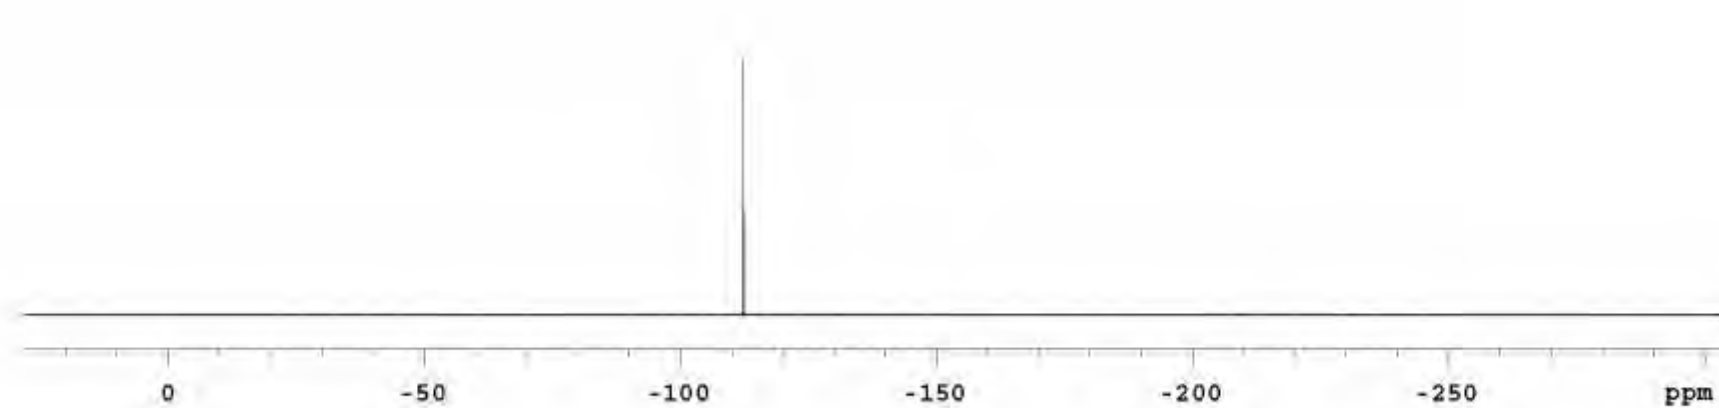

**$^{13}\text{C}$  NMR of 5-Difluoromethyl-2-methylbenzo[*d*]thiazole (3n)**CDCl<sub>3</sub>, 23 °C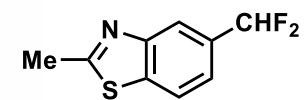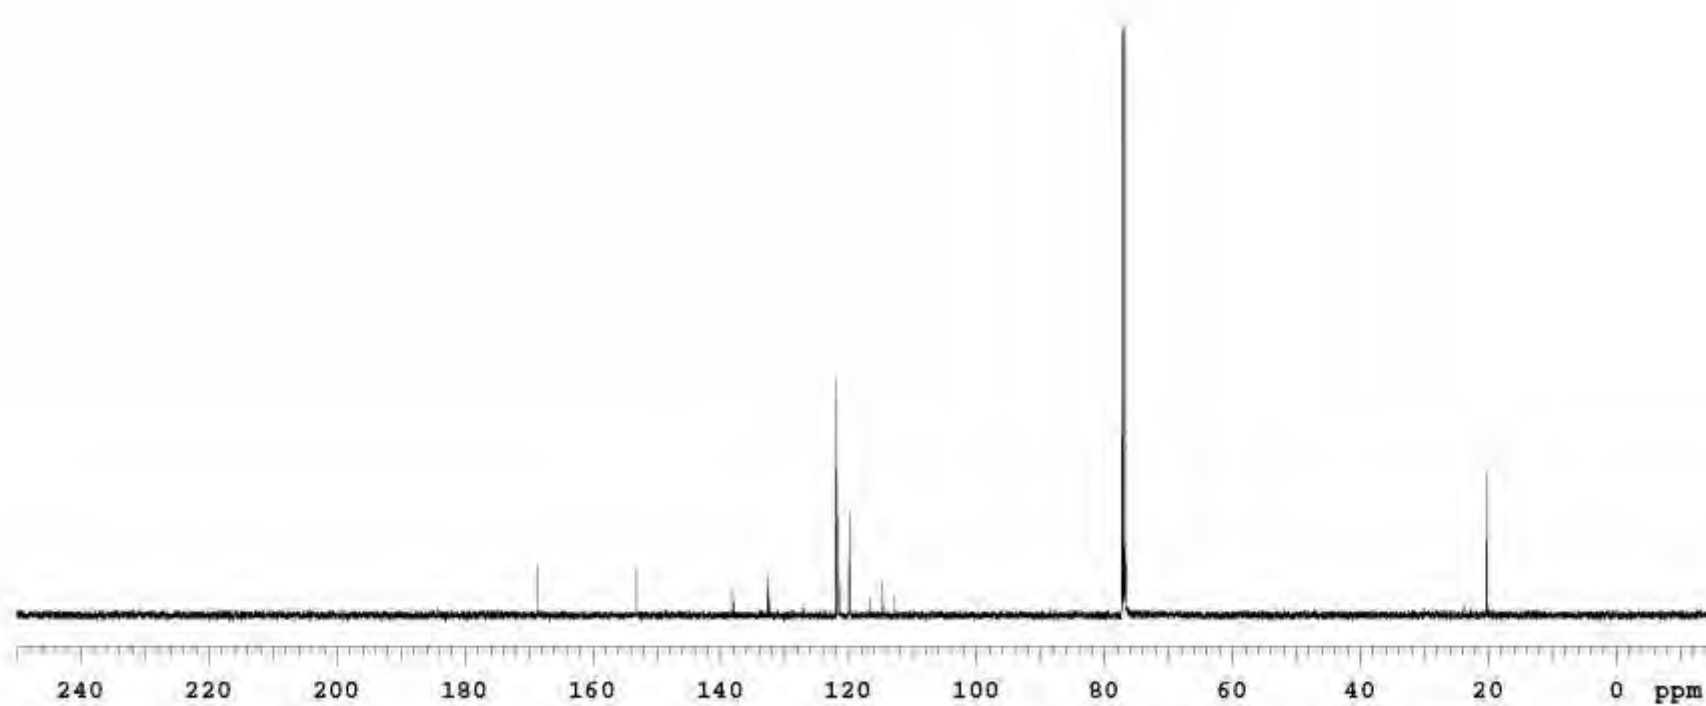



**$^1\text{H}$  NMR of 3-Difluoromethylquinoline (3p)**CDCl<sub>3</sub>, 23 °C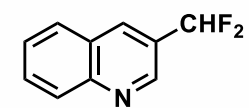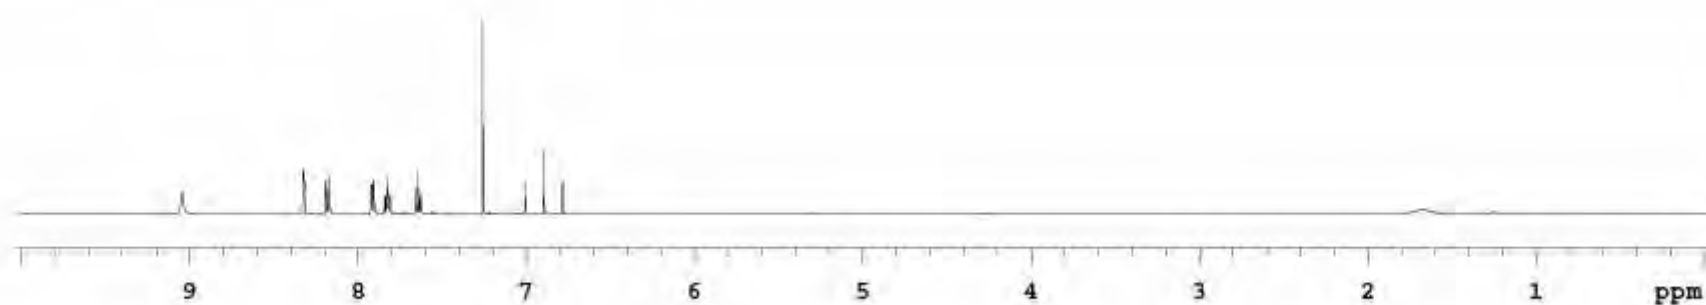

**$^{19}\text{F}$  NMR of 3-Difluoromethylquinoline (3p)**CDCl<sub>3</sub>, 23 °C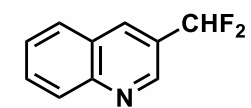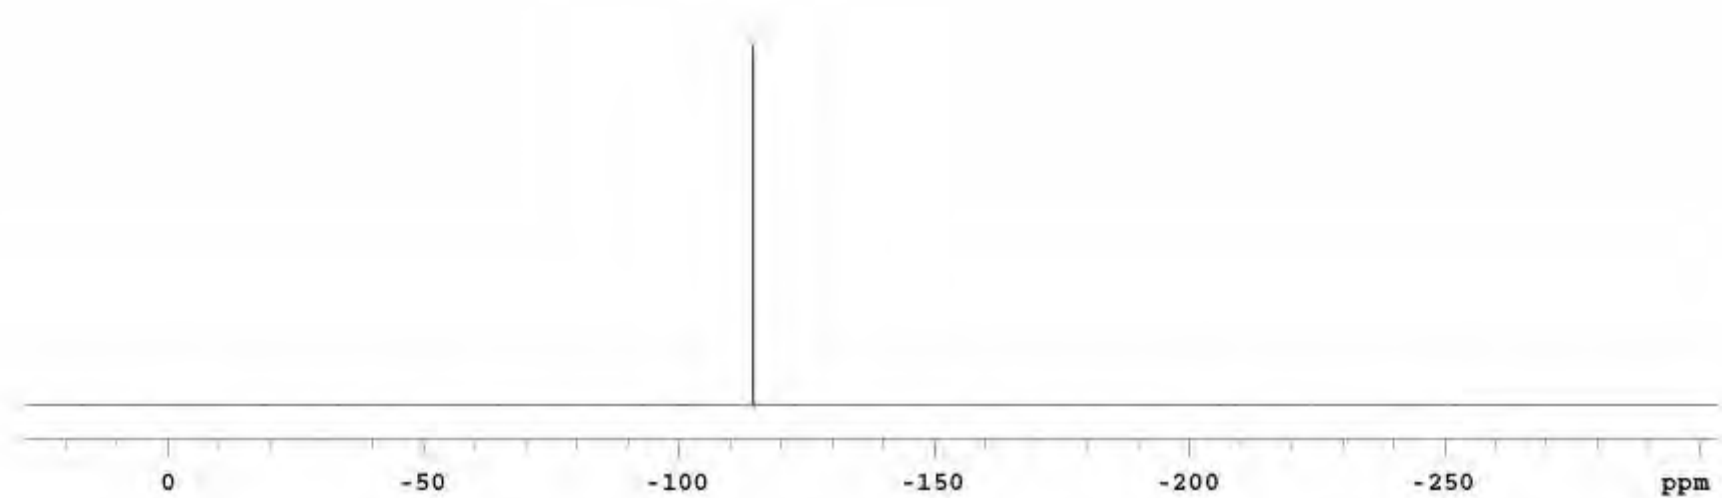

**$^{13}\text{C}$  NMR of 3-Difluoromethylquinoline (3p)**CDCl<sub>3</sub>, 23 °C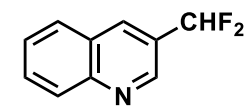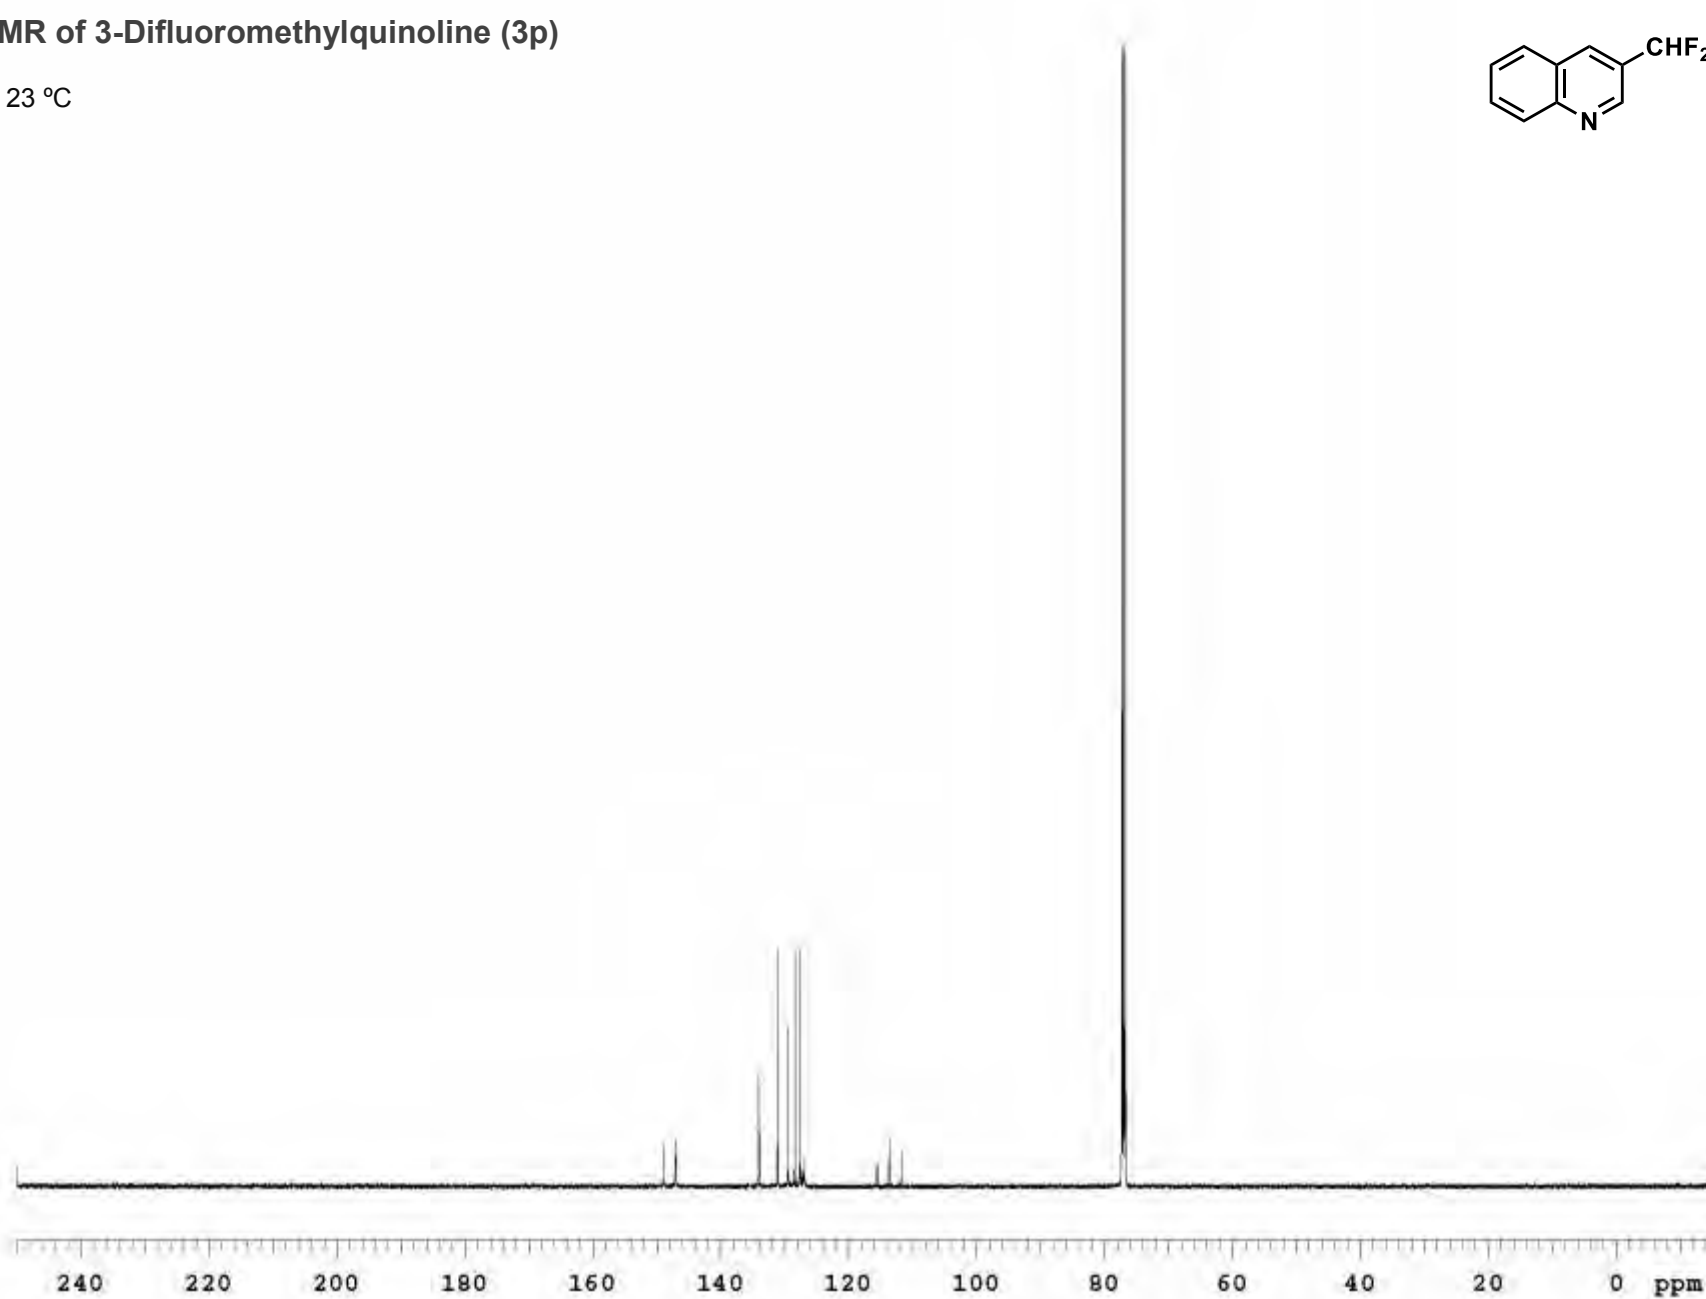

**$^1\text{H}$  NMR of 4-Morpholinomethyl-difluoromethylbenzene (3q)**CDCl<sub>3</sub>, 25 °C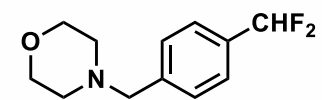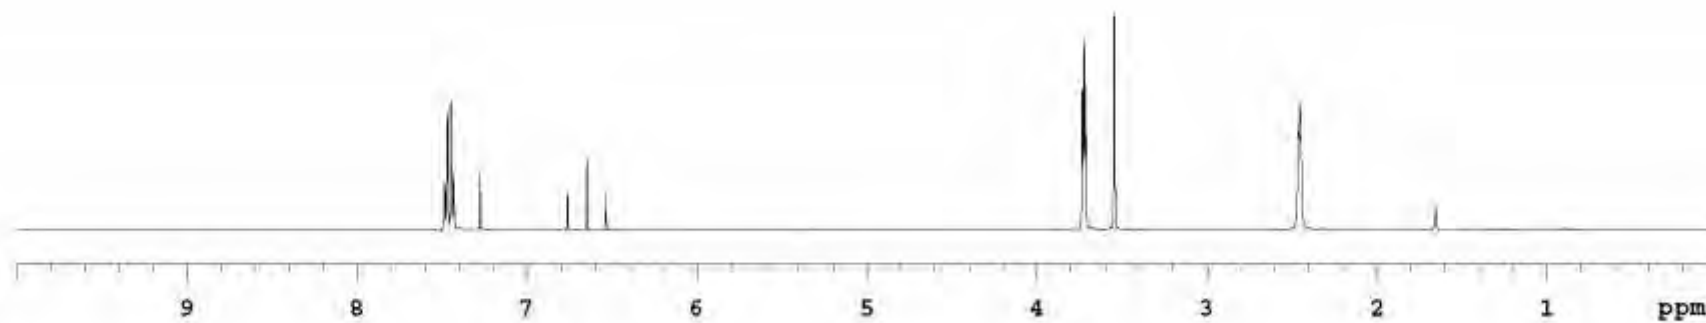

**$^{19}\text{F}$  NMR of 4-Morpholinomethyl-difluoromethylbenzene (3q)**CDCl<sub>3</sub>, 24 °C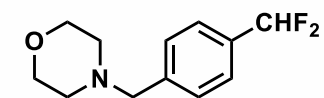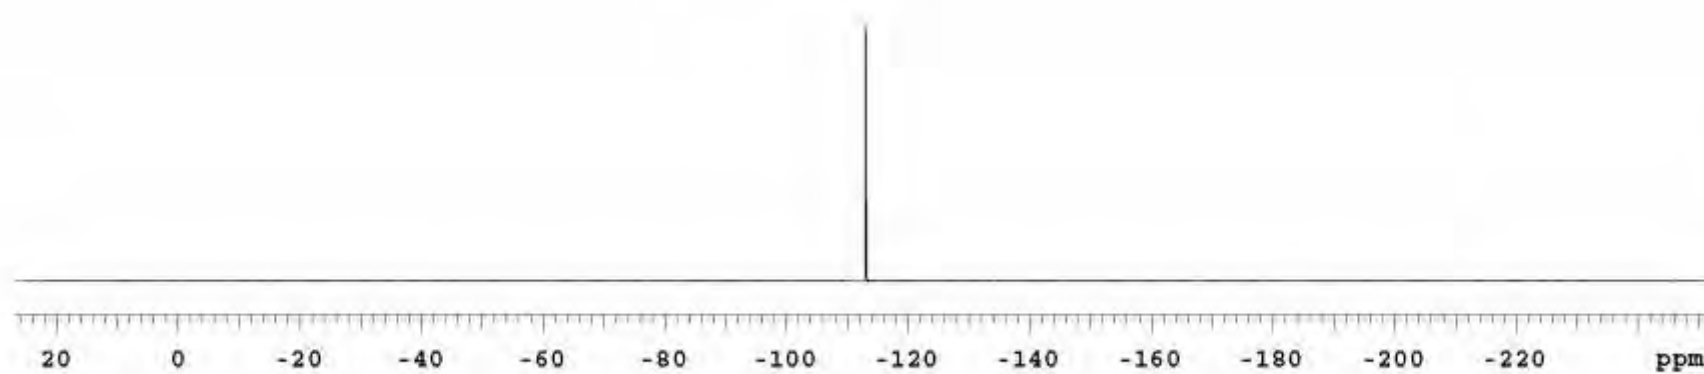

**$^{13}\text{C}$  NMR of 4-Morpholinomethyl-difluoromethylbenzene (3q)**CDCl<sub>3</sub>, 25 °C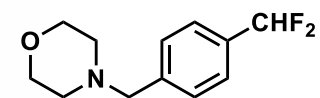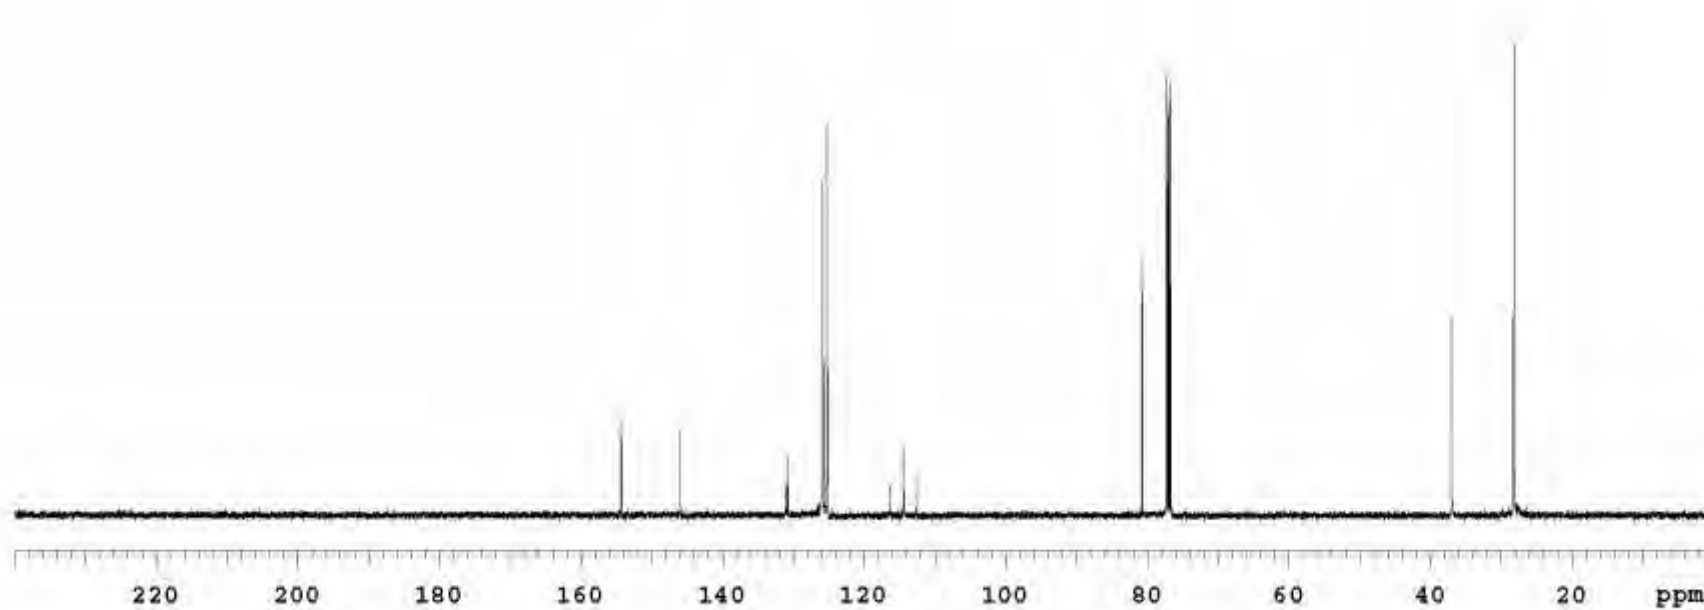

**$^1\text{H}$  NMR of Difluoromethyl-fenofibrate**CDCl<sub>3</sub>, 25 °C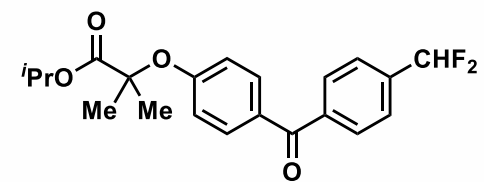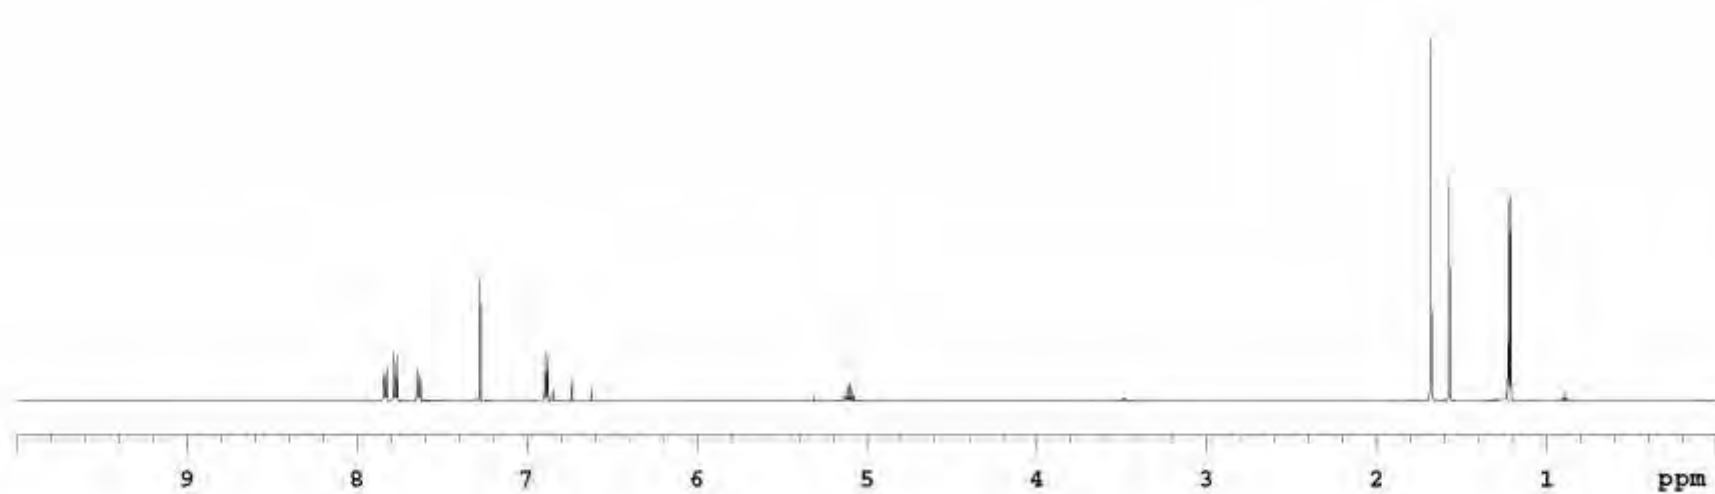

**$^{19}\text{F}$  NMR of Difluoromethyl-fenofibrate**CDCl<sub>3</sub>, 24 °C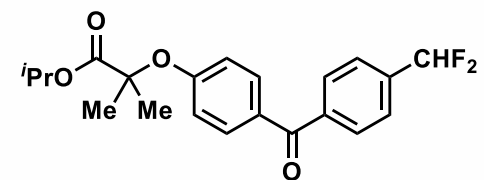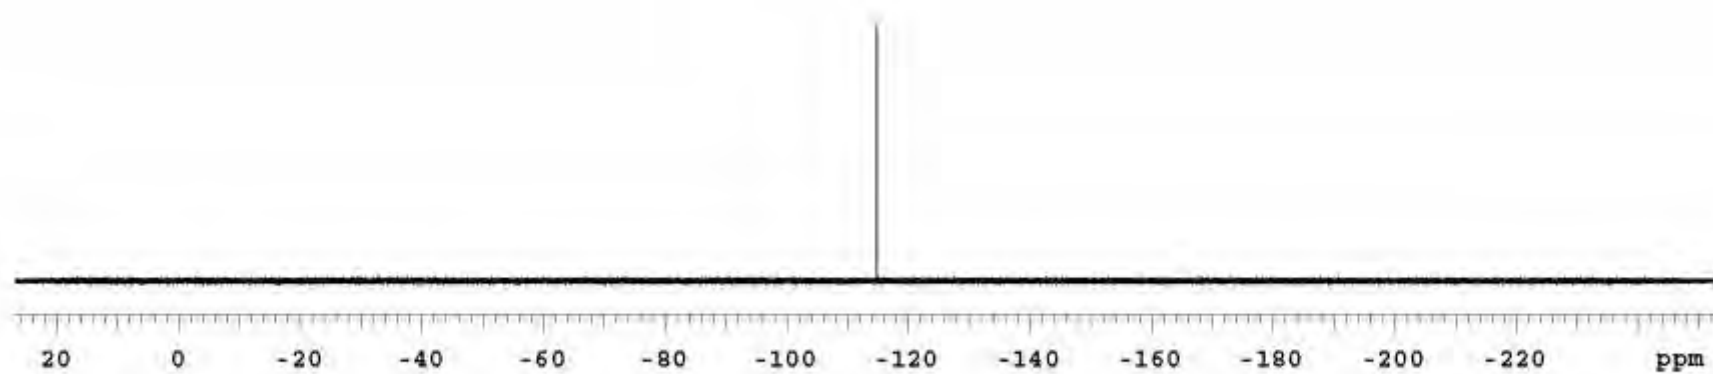



**$^{13}\text{C}$  NMR of Difluoromethyl-fenofibrate**CDCl<sub>3</sub>, 25 °C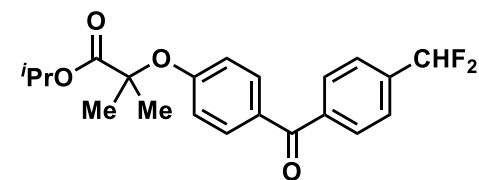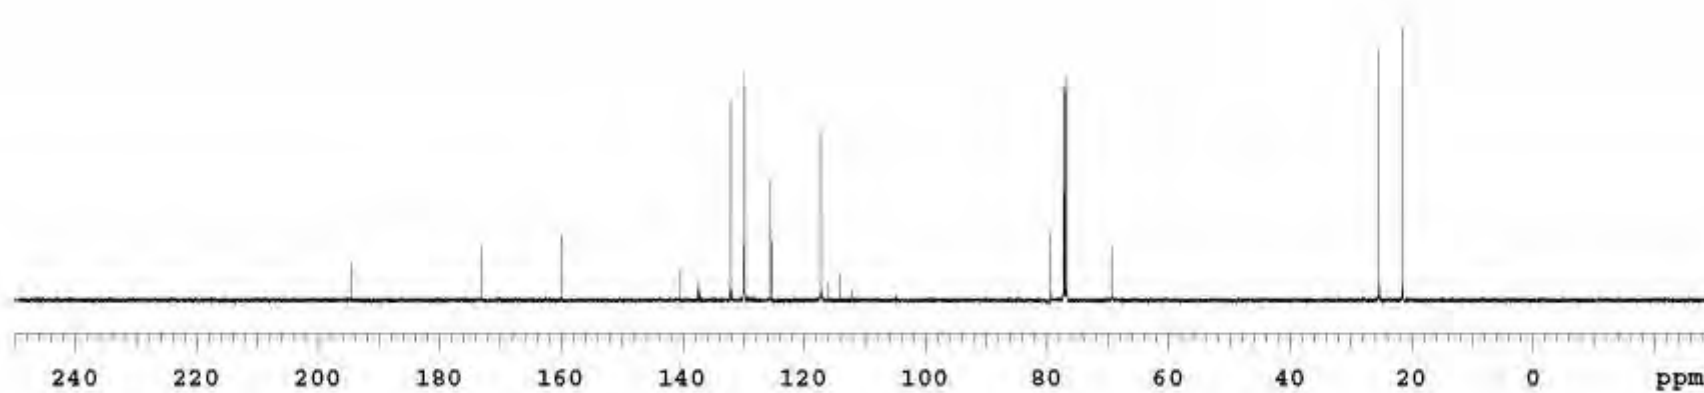

**$^1\text{H}$  NMR of Difluoromethyl-DAA1106**CDCl<sub>3</sub>, 55 °C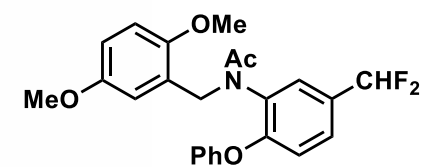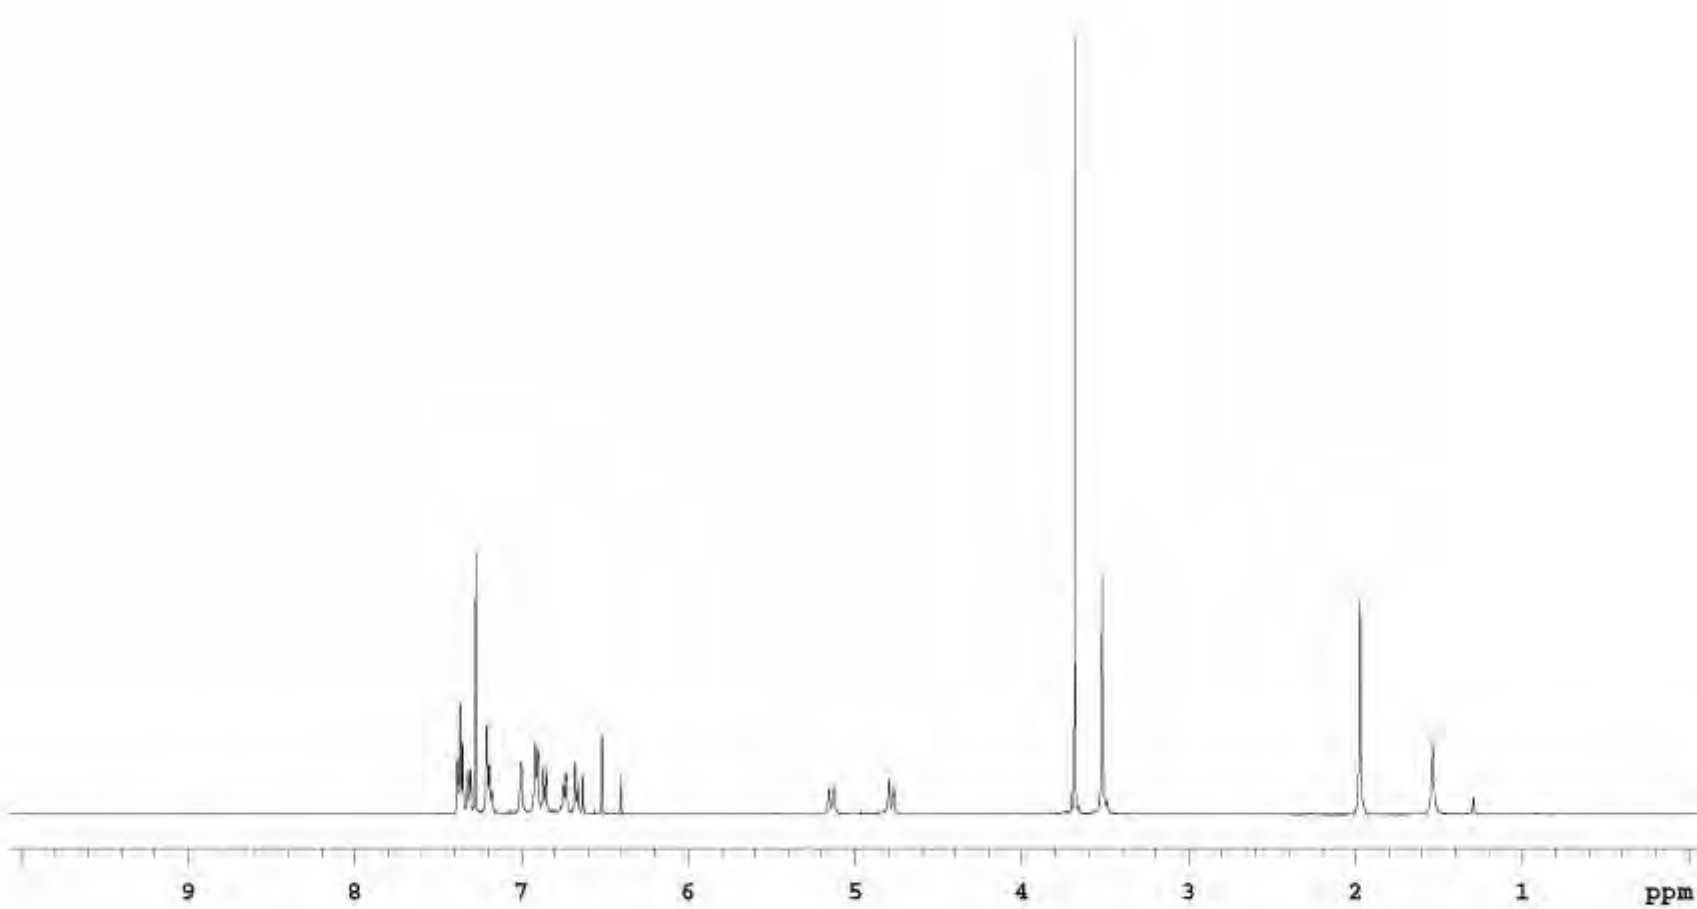

**$^{19}\text{F}$  NMR of Difluoromethyl-DAA1106**CDCl<sub>3</sub>, 25 °C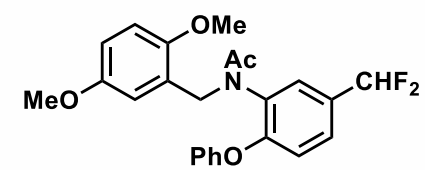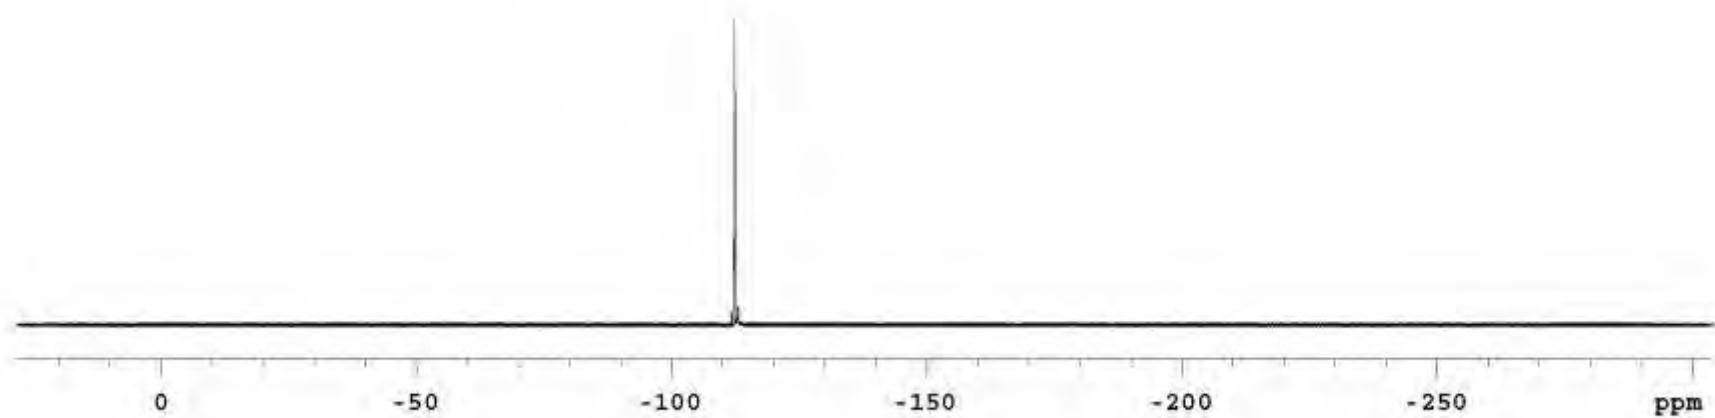

**$^{13}\text{C}$  NMR of Difluoromethyl-DAA1106**CDCl<sub>3</sub>, 23 °C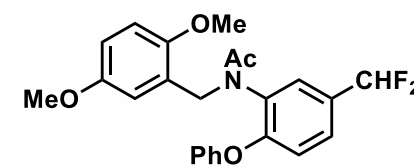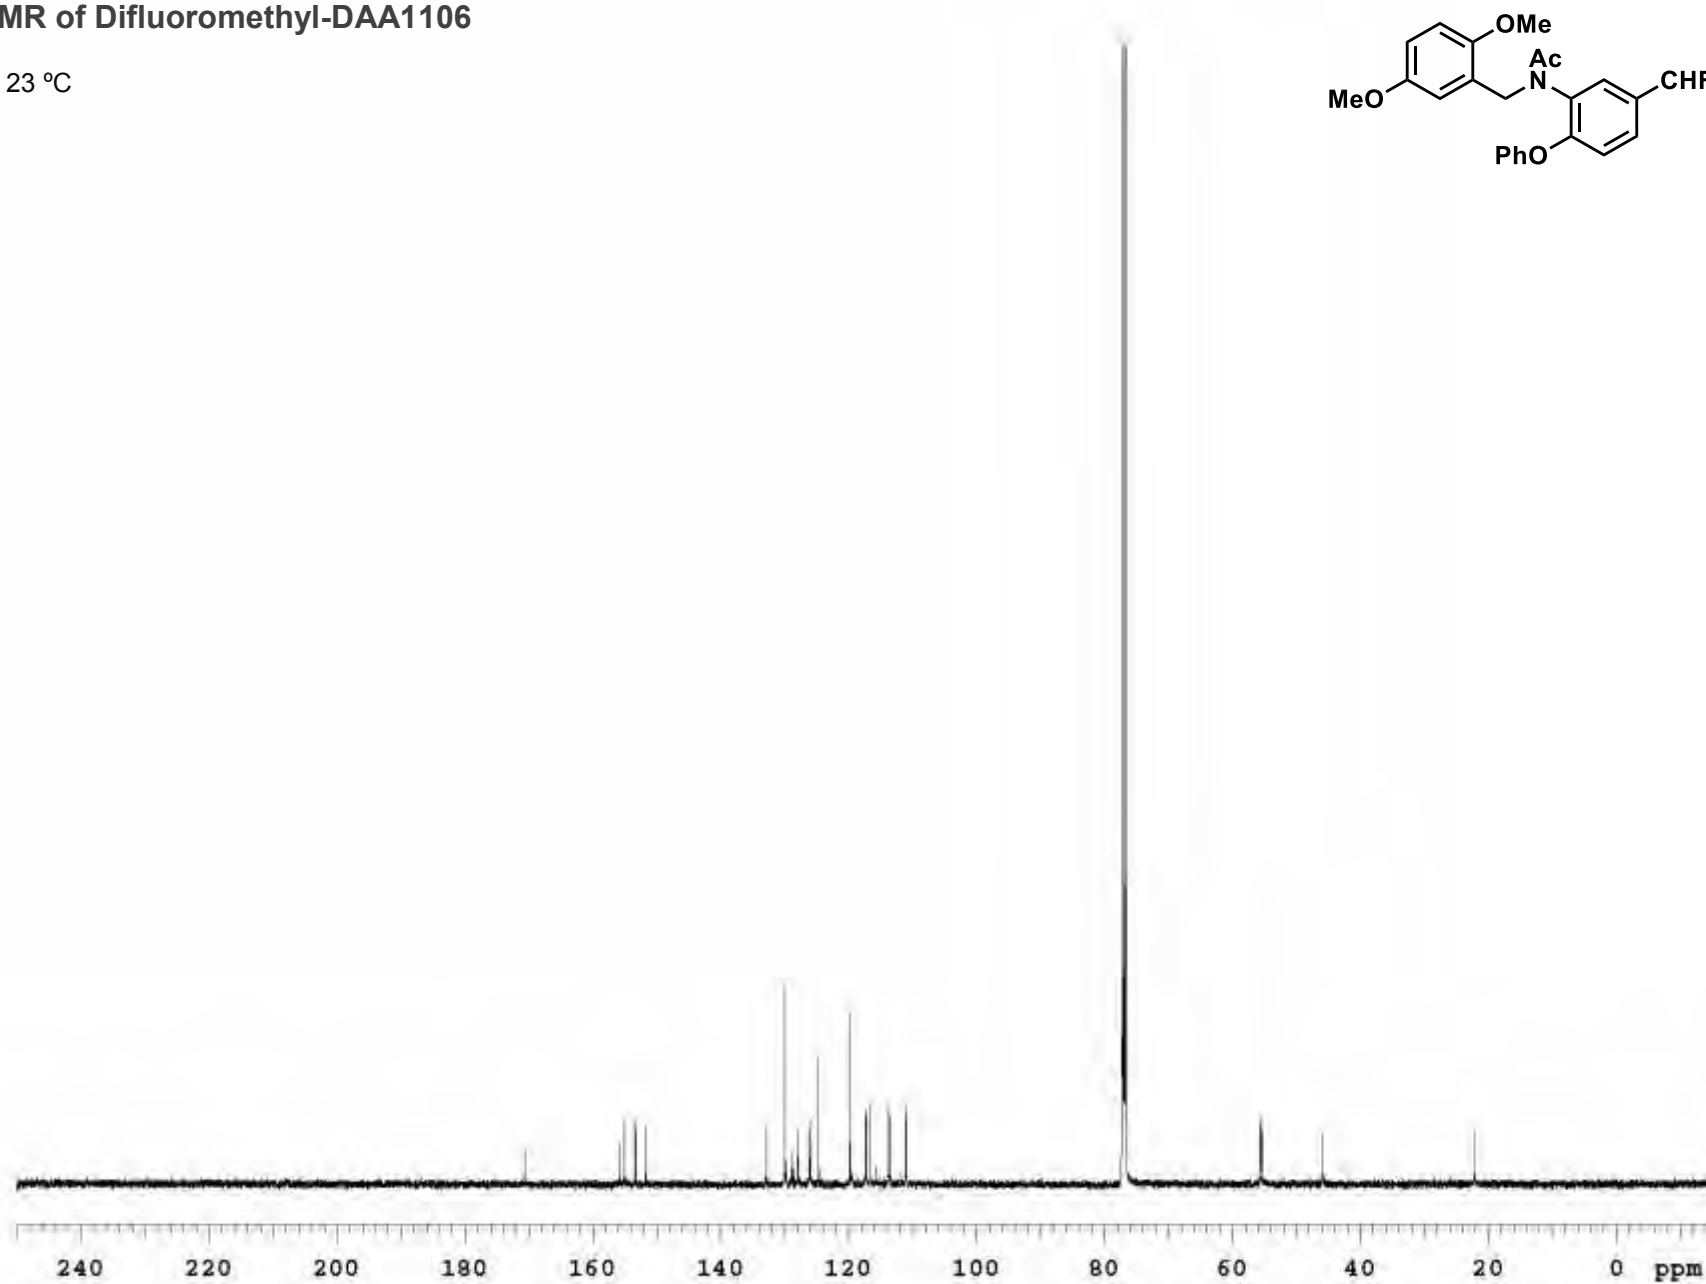

**$^1\text{H}$  NMR of Difluoromethyl-estrone**CDCl<sub>3</sub>, 23 °C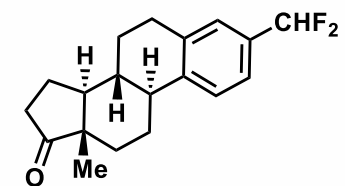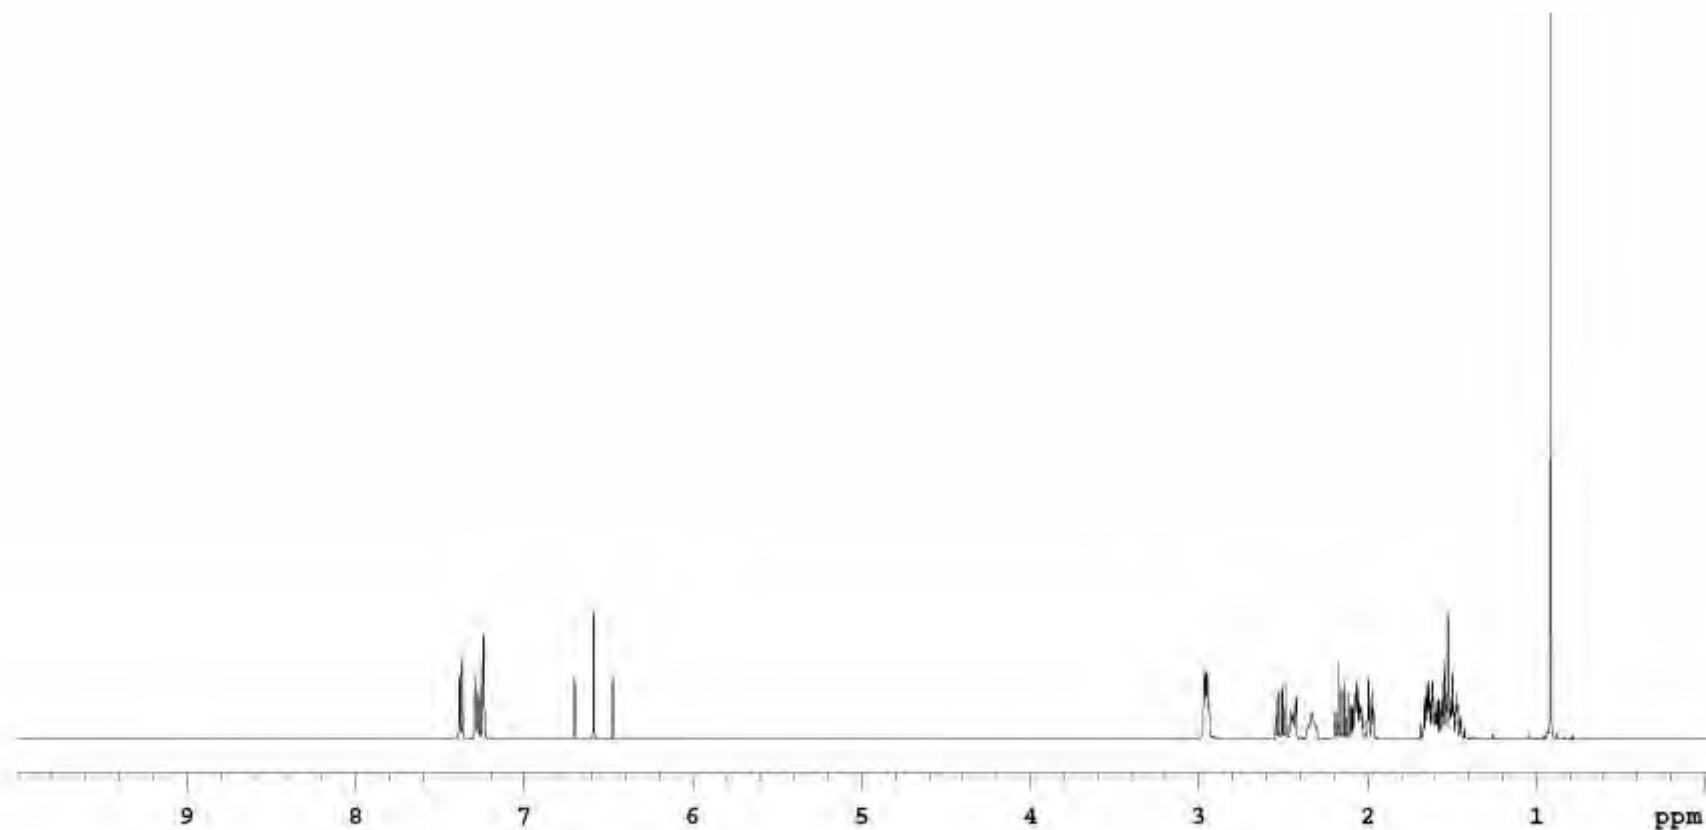

**$^{19}\text{F}$  NMR of Difluoromethyl-estrone**CDCl<sub>3</sub>, 25 °C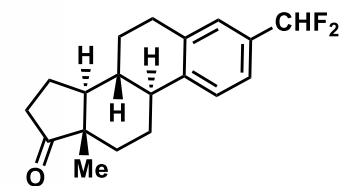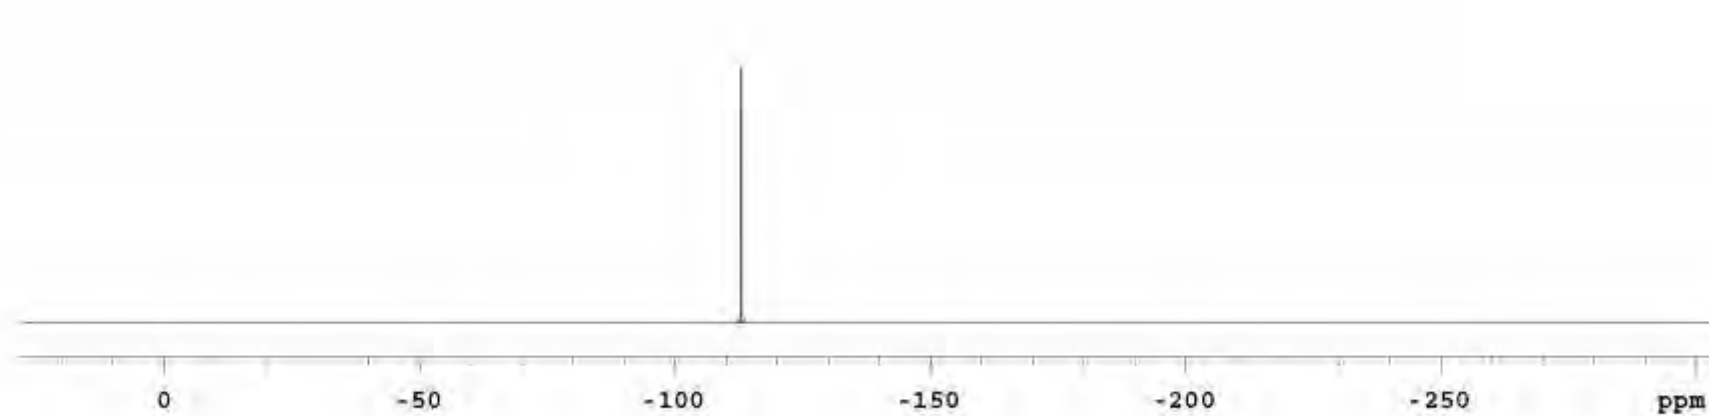

**$^{13}\text{C}$  NMR of Difluoromethyl-estrone**CDCl<sub>3</sub>, 25 °C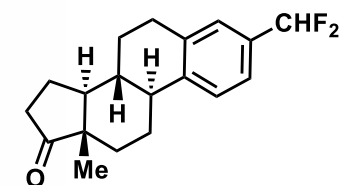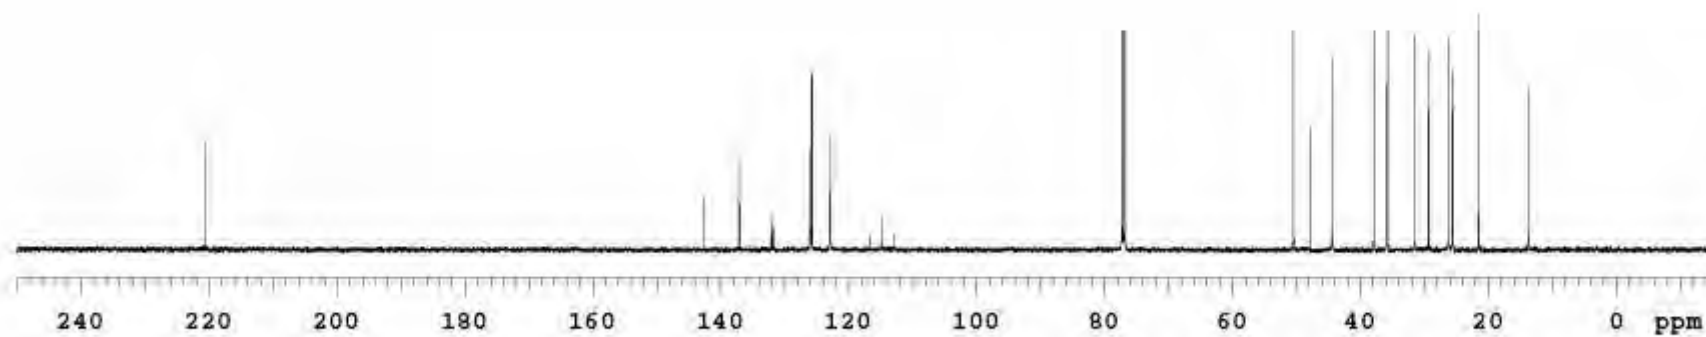

**$^1\text{H}$  NMR of Difluoromethyl-claritin**CDCl<sub>3</sub>, 25 °C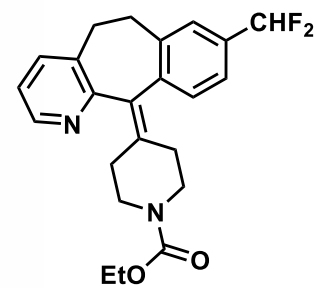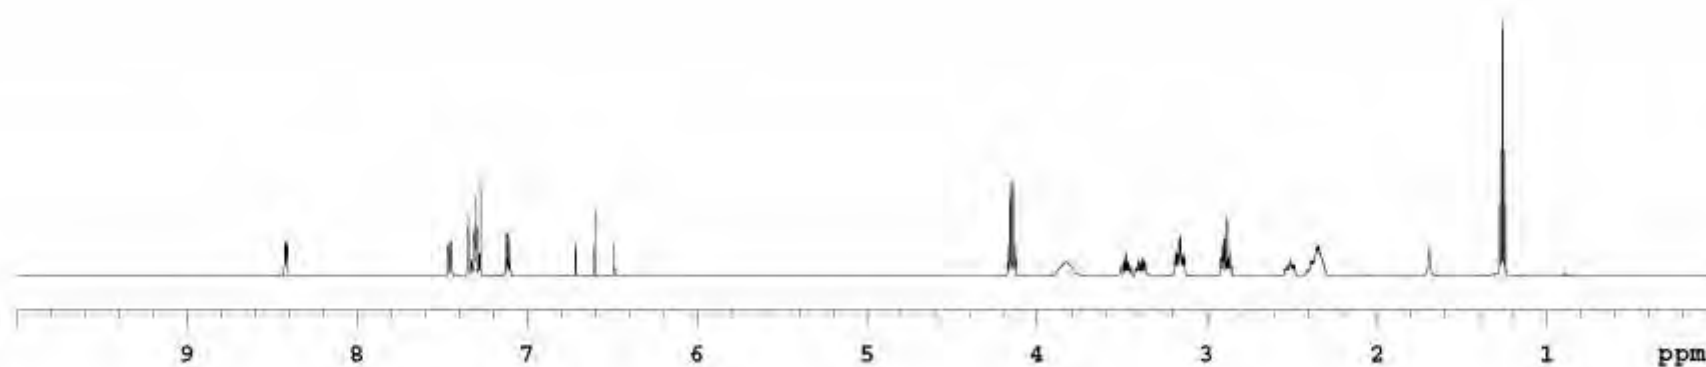



**$^{19}\text{F}$  NMR of Difluoromethyl-claritin**CDCl<sub>3</sub>, 24 °C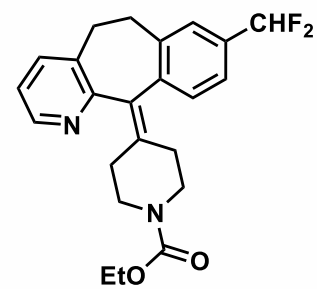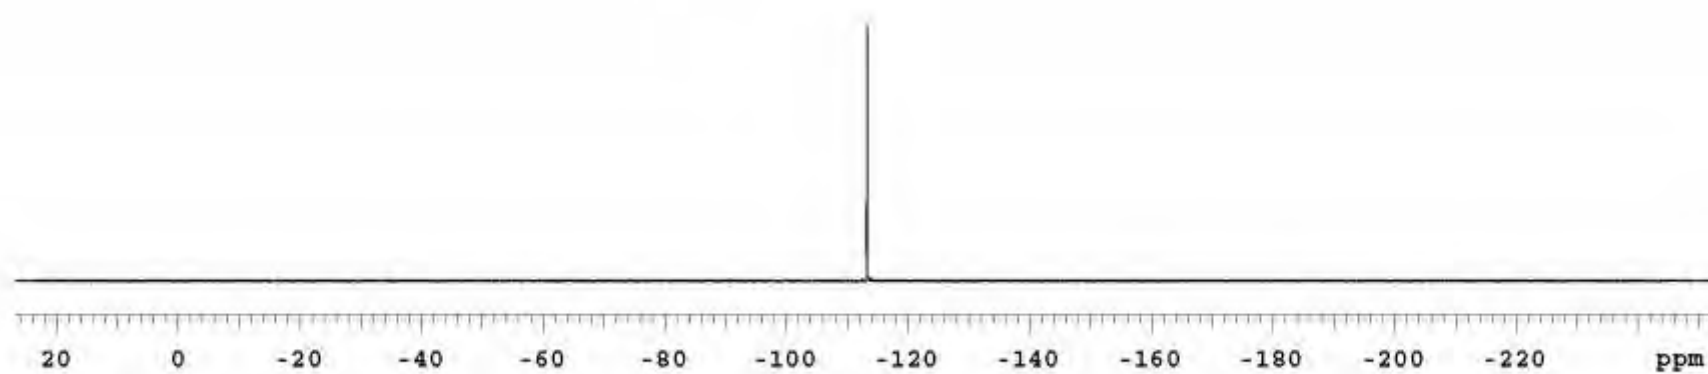

**$^{13}\text{C}$  NMR of Difluoromethyl-claritin**CDCl<sub>3</sub>, 25 °C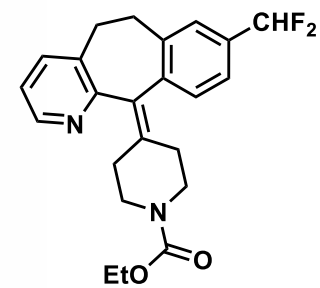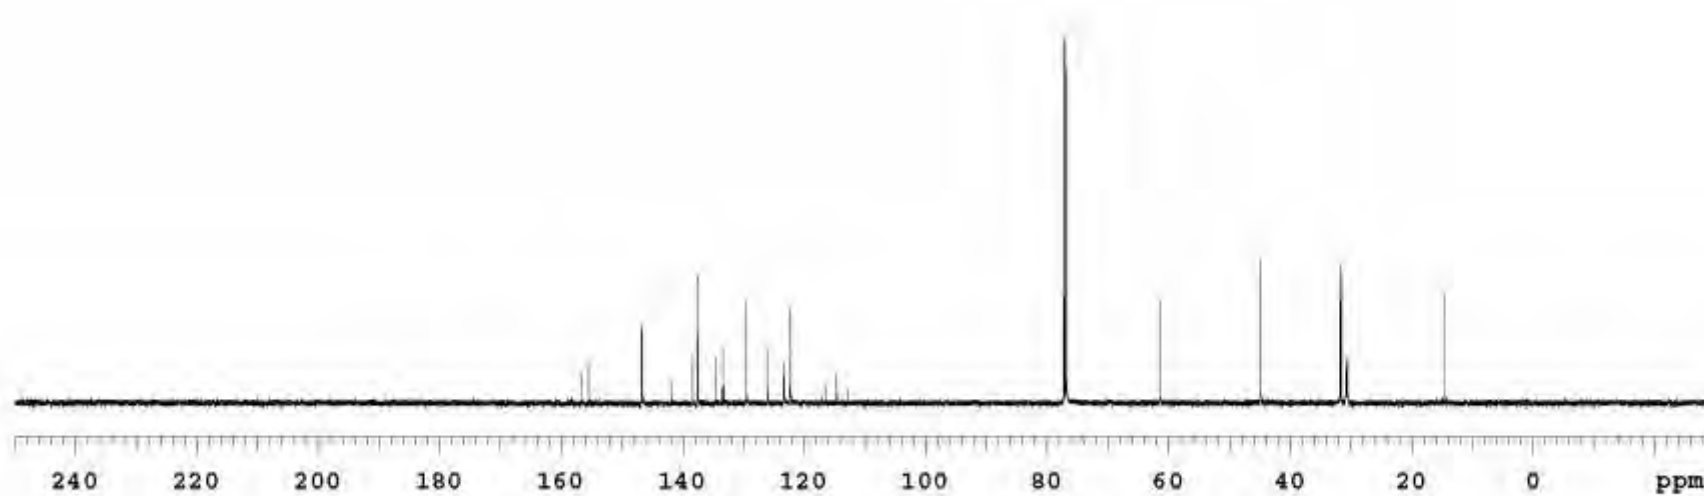

**$^1\text{H}$  NMR of Difluoromethyl-*N*-Boc-fluoxetine**CDCl<sub>3</sub>, 50 °C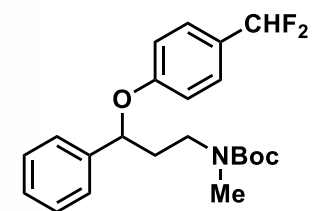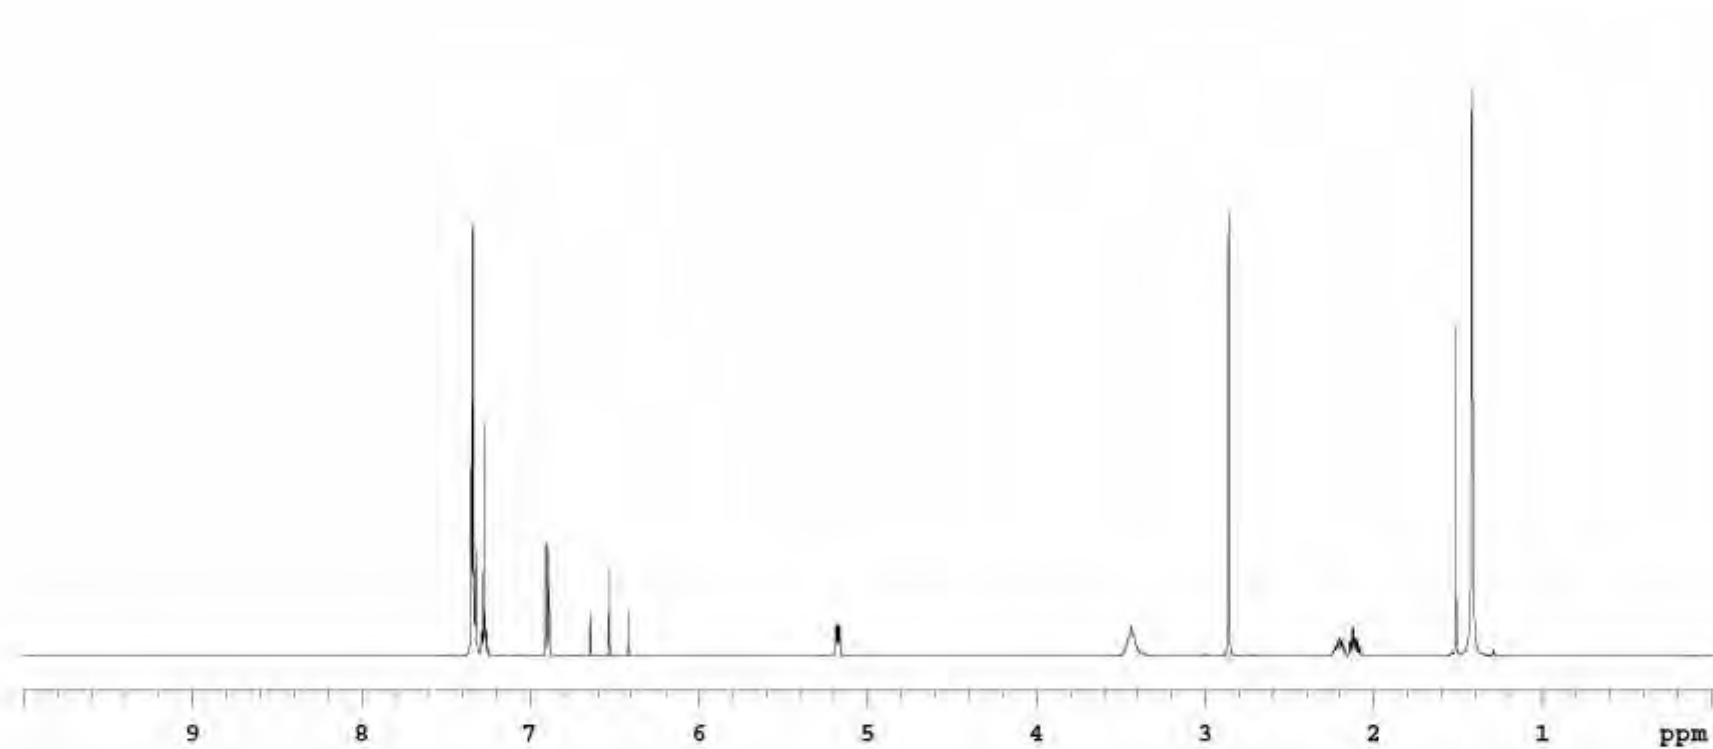

**$^{19}\text{F}$  NMR of Difluoromethyl-*N*-Boc-fluoxetine**CDCl<sub>3</sub>, 21 °C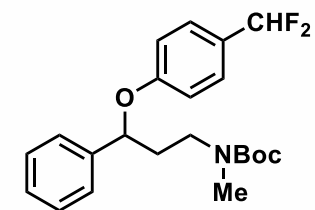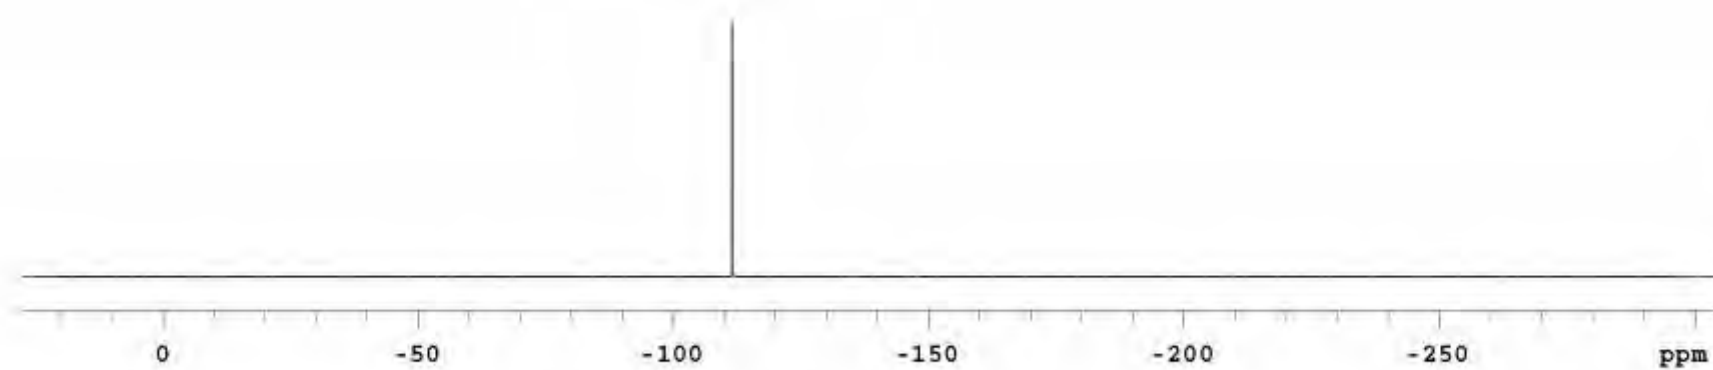

**$^{13}\text{C}$  NMR of Difluoromethyl-*N*-Boc-fluoxetine**CDCl<sub>3</sub>, 50 °C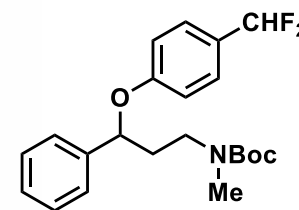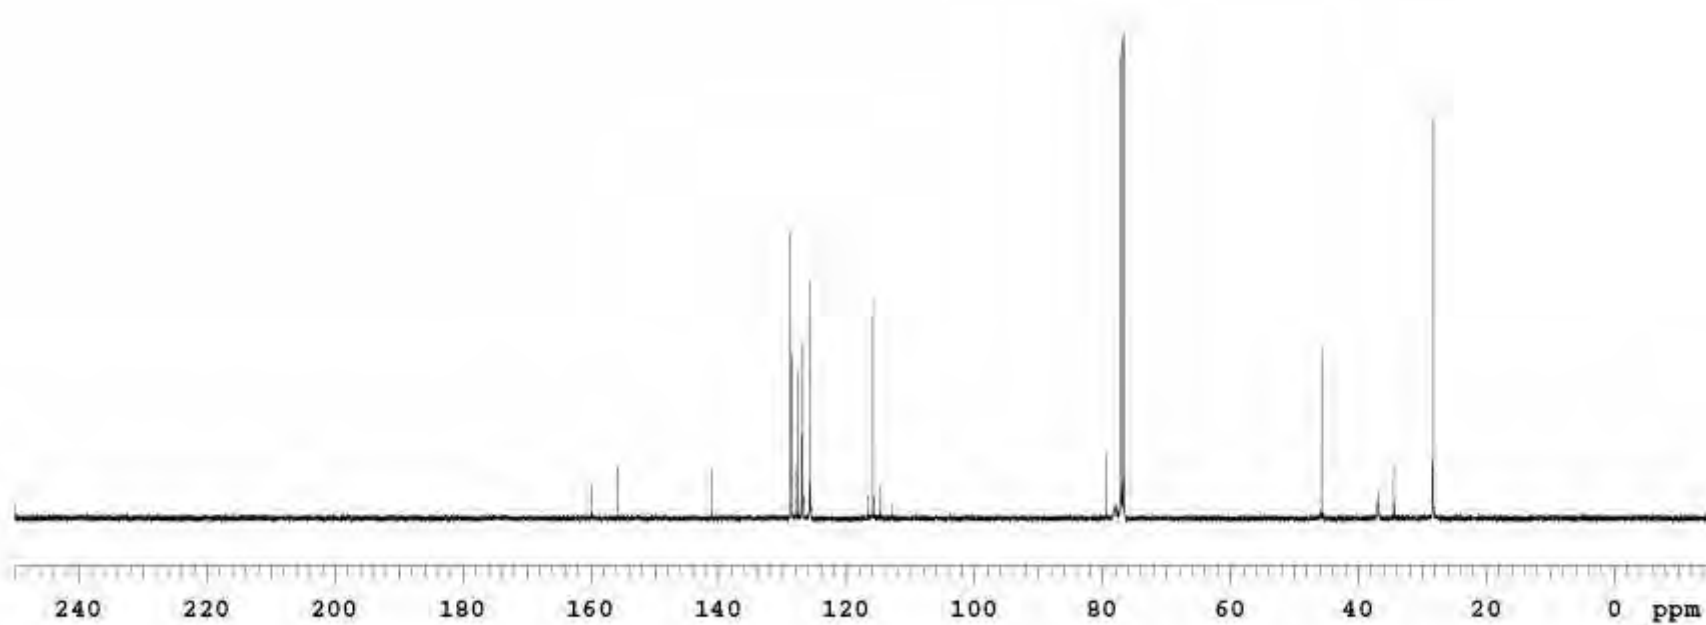

**$^1\text{H}$  NMR of Difluoromethyl-SC-58125**CDCl<sub>3</sub>, 25 °C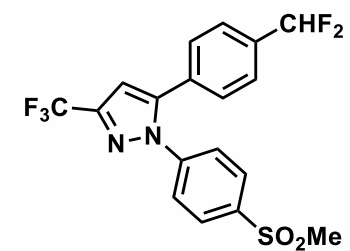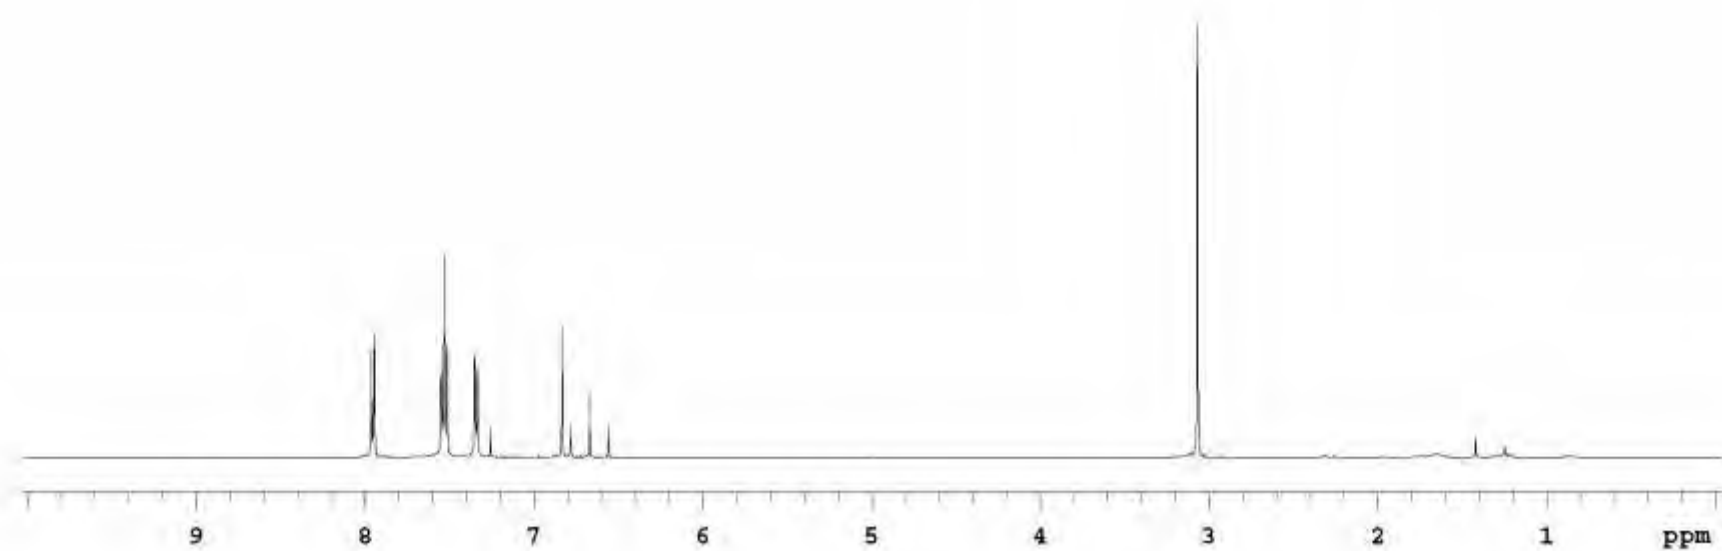

**$^{19}\text{F}$  NMR of Difluoromethyl-SC-58125**CDCl<sub>3</sub>, 25 °C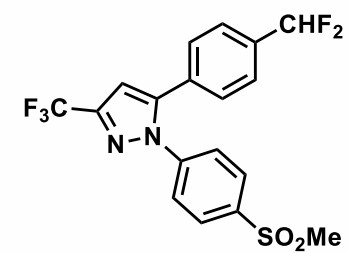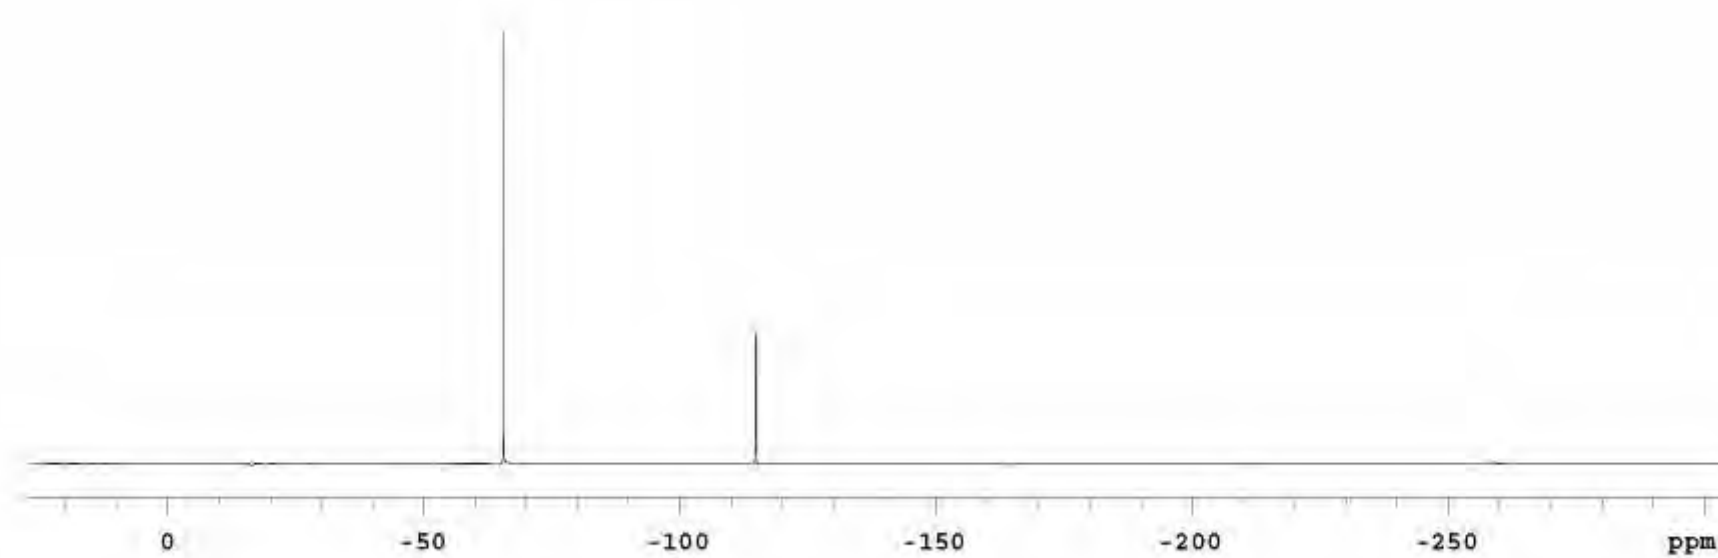

**$^{13}\text{C}$  NMR of Difluoromethyl-SC-58125**CDCl<sub>3</sub>, 23 °C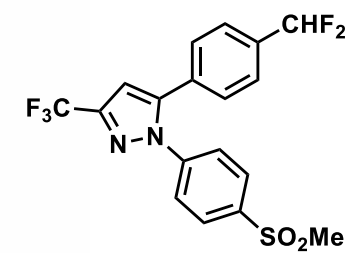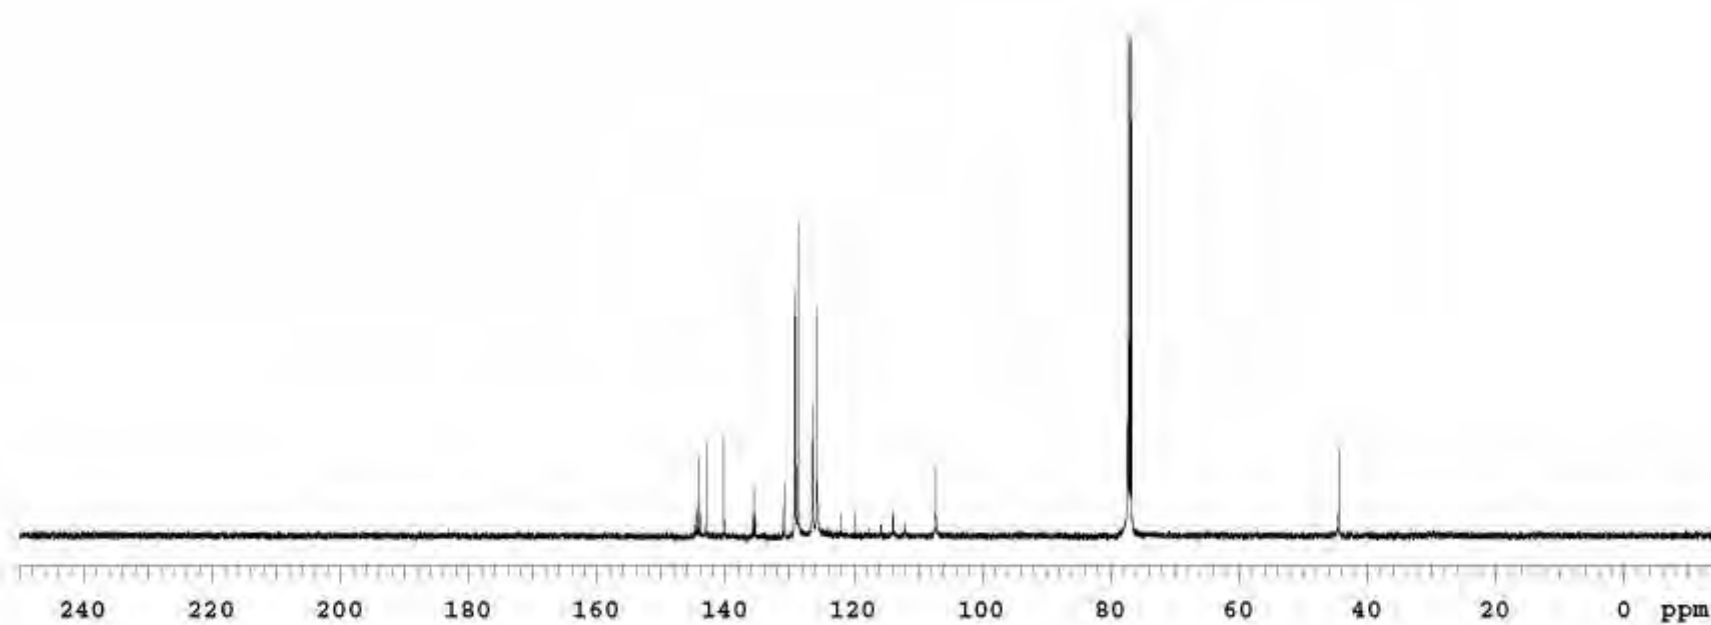



**$^1\text{H}$  NMR of Hydroquinidine 4-difluoromethylbenzoate**CDCl<sub>3</sub>, 25 °C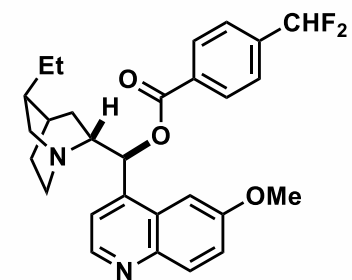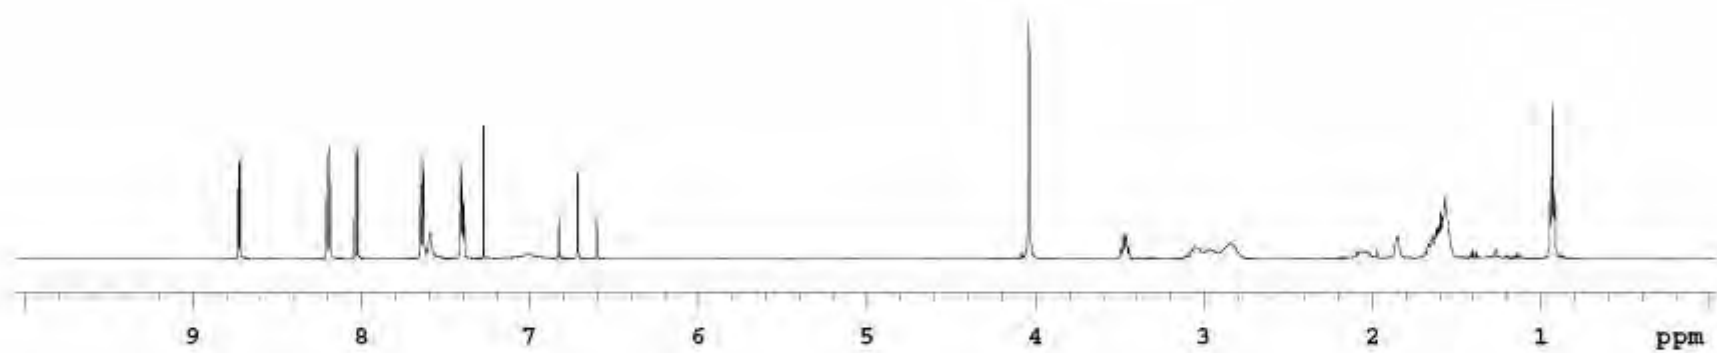

**$^{19}\text{F}$  NMR of Hydroquinidine 4-difluoromethylbenzoate**CDCl<sub>3</sub>, 25 °C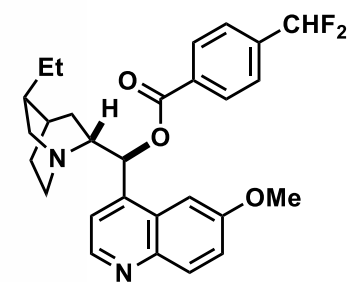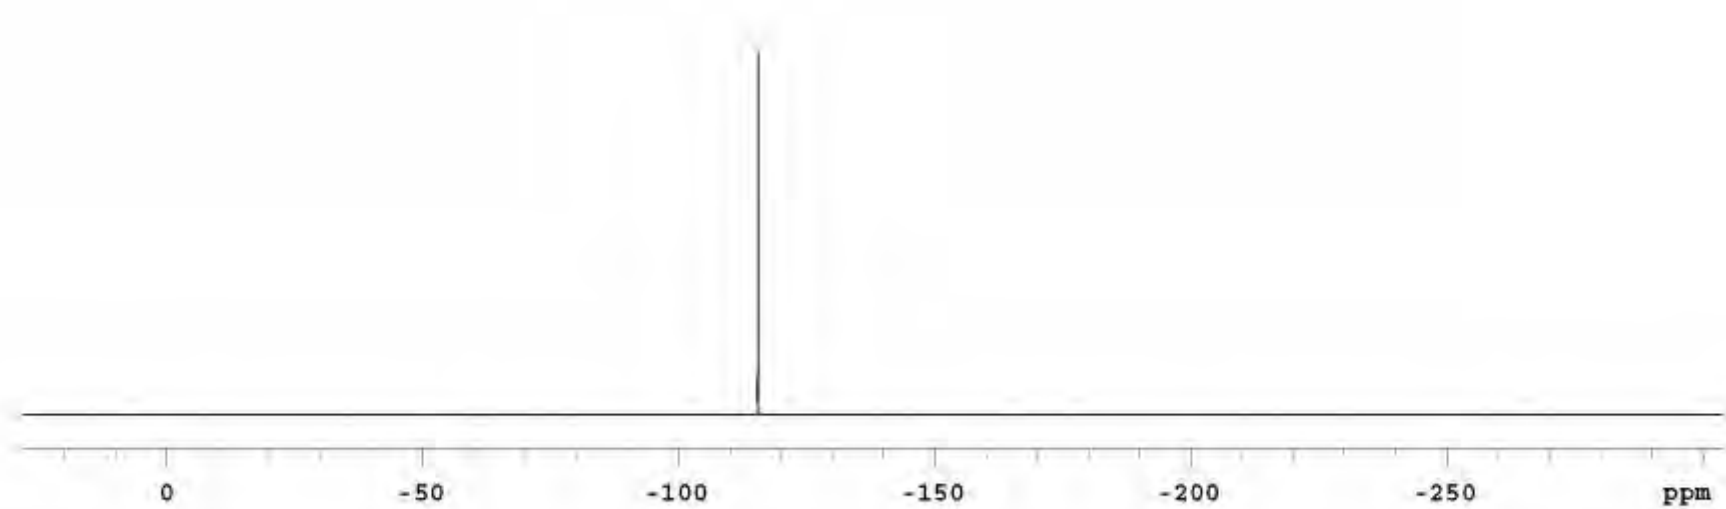

**$^{13}\text{C}$  NMR of Hydroquinidine 4-difluoromethylbenzoate**CDCl<sub>3</sub>, 25 °C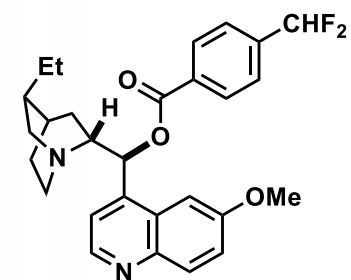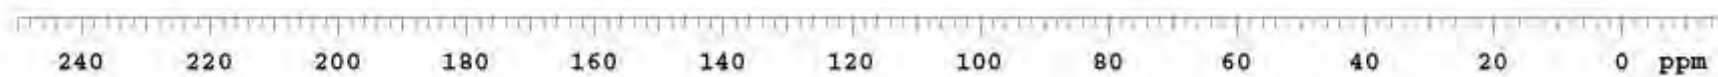

Supplement: NIHMS835874-supplement-Supporting_Information.pdf [file NIHMS835874-supplement-Supporting_Information.pdf]
